# Supplementary material
Source: Research Square preprint supplement (doi:10.21203/rs.3.rs-9258373/v1)
Supplement: Supplementary file 1 [file 01593c4cb6a84dc5d7c84674.xlsx]

## Sheet: Biological-rPSL DIA
Genes	Number of Unique Peptides	List of Peptides
C1QC	5	FQSVFTVTR, TNQVNSGGVLLR, QTHQPPAPNSLIR, GEPGIPAIPGIR, GEPGIPAIPGIRGPK
CDX2	1	KAELAATLGLSER
CEACAM5	9	QIIGYVIGTQQATPGPAYSGR, TLTLFNVTR, SDLVNEEATGQFR, CETQNPVSAR, SDSVILNVLYGPDAPTISPLNTSYR, AYVCGIQNSVSANR, INGIPQQHTQVLFIAK, RSDSVILNVLYGPDAPTISPLNTSYR, SDPVTLDVLYGPDTPIISPPDSSYLSGANLNLSCHSASNPSPQYSWR
CPQ	8	VGALASLIR, LALLVDTVGPR, IAILGLGSSIGTPPEGITAEVLVVTSFDELQR, LVLWTAEEQGGVGAFQYYQLHK, GEESAVMLEPR, TFEEIKEEIASCGDVAK, TQGAVEAAK, IVVYNQPYINYSR
CXCL10	2	SLEKLEIIPASQFCPR, LEIIPASQFCPR
EGF	1	YACNCVVGYIGER
ELF3	3	ASWLGEQPQFWSK, DILIHPELNEGLMK, NKYDASAIDFSR
ITGAV	20	MFLLVGAPK, VDLAVLAAVEIR, LTPITIFMEYR, YDPNVYSIK, GATDIDKNGYPDLIVGAFGVDR, VLLGGPGSFYWQGQLISDQVAEIVSK, SSASFNVIEFPYK, AGTQLLAGLR, AMLHLQWPYK, CQPIEFDATGNR, GGLMQCEELIAYLR, IYIGDDNPLTLIVK, ENPETEEDVGPVVQHIYELR, AQNQGEGAYEAELIVSIPLQADFIGVVR, TCSLPGTALK, LQEVGQVSVSLQR, TLGMVYIYDGK, QVVCDLGNPMK, DKLTPITIFMEYR, ILACAPLYHWR
ITGB1	11	SGEPQTFTLK, TVMPYISTTPAK, SAVTTVVNPK, GICECGVCK, GCPPDDIENPR, GEVFNELVGK, LKPEDITQIQPQQLVLR, DNTNEIYSGK, SLGTDLMNEMR, IGFGSFVEK, FCECDNFNCDR
ITGB6	4	DSGNILQLIISAYEELR, LGFGSFVEKPVSPFVK, DGSVSCSLQGENECLITFLITTDNEGK, VGDTASFSVTVNIPHCER
KPNA2	1	EKQPPIDNIIR
KRT17	1	YCVQLSQIQGLIGSVEEQLAQLR
KRT20	15	LGTTPSVYGGAGGR, GTEVQLTELR, TTEYQLSTLEER, TVVQEVVDGK, MAMQNLNDR, SLSSSLQAPVVSTVGMQR, VFDDLTLHK, CVLQIDNAK, LTVEADLQGLNK, GTEVQLTELRR, QWYETNAPR, VVSSEVKEVEENI, ESLEHTLEETK, QNNEYHILLDIK, HTVNYGSDLTGGGDLFVGNEK
MIA	4	LGYFPSSIVR, LGYFPSSIVREDQTLKPGK, GQVVYVFSK, TDKWDFYCQ
MMP2	1	AFQVWSDVTPLR
MMP3	3	TYFFVEDKYWR, FLGLEVTGKLDSDTLEVMR, LEPELHLISSFWPSLPSGVDAAYEVTSK
MMP9	12	SYSACTTDGR, QSTLVLFPGDLR, AFALWSAVTPLTFTR, FQTFEGDLK, AVIDDAFAR, EYSTCTSEGR, SLGPALLLLQK, MFPGVPLDTHDVFQYR, FGNADGAACHFPFIFEGR, QLAEEYLYR, SDGLPWCSTTANYDTDDRFGFCPSER, LGLGADVAQVTGALR
MUC1	4	YVPPSSTDR, QGGFLGLSNIK, DISEMFLQIYK, NYGQLDIFPAR
PFN1	7	DSPSVWAAVPGK, TFVNITPAEVGVLVGK, DSLLQDGEFSMDLR, TFVNITPAEVGVLVGKDR, STGGAPTFNVTVTK, TDKTLVLLMGK, SSFYVNGLTLGGQK
PLAUR	4	LWEEGEELELVEK, VEECALGQDLCR, SPEEQCLDVVTHWIQEGEEGRPK, ITSLTEVVCGLDLCNQGNSGR
PTEN	5	YVYYYSYLLK, TGVMICAYLLHR, YQEDGFDLDLTYIYPNIIAMGFPAER, EDKFMYFEFPQPLPVCGDIK, ADNDKEYLVLTLTK
S100A8	3	ALNSIIDVYHK, LLETECPQYIR, KLLETECPQYIR
S100A9	4	LGHPDTLNQGEFK, NIETIINTFHQYSVK, TCKMSQLER, VIEHIMEDLDTNADK
SATB1	3	AMQNFLQLPEAER, FLSLPQPER, TLWENLSMIR
TIMP1	4	GFQALGDAADIR, EPGLCTWQSLR, SEEFLIAGK, FVYTPAMESVCGYFHR
TP53	3	LLPENNVLSPLPSQAMDDLMLSPDDIEQWFTEDPGPDEAPR, VEYLDDRNTFR, MPEAAPPVAPAPAAPTPAAPAPAPSWPLSSSVPSQK
TYMS	2	EEGDLGPVYGFQWR, TGTGTLSVFGMQAR

## Sheet: rPSL DIA
Genes	Number of Unique Peptides	List of Peptides
C1QC	4	FQSVFTVTR, TNQVNSGGVLLR, QTHQPPAPNSLIR, NGPMGPPGMPGVPGPMGIPGEPGEEGR
CDX2	1	KAELAATLGLSER
CEACAM5	8	QIIGYVIGTQQATPGPAYSGR, CETQNPVSAR, SDLVNEEATGQFR, INGIPQQHTQVLFIAK, SDSVILNVLYGPDAPTISPLNTSYR, AYVCGIQNSVSANR, SDPVTLDVLYGPDTPIISPPDSSYLSGANLNLSCHSASNPSPQYSWR, ITPNNNGTYACFVSNLATGR
CPQ	6	LALLVDTVGPR, LVLWTAEEQGGVGAFQYYQLHK, GEESAVMLEPR, AIINLAVYGK, SVASFSIYSPHTGIQEYQDGVPK, TFEEIKEEIASCGDVAK
CXCL10	1	SLEKLEIIPASQFCPR
CXCL12	1	ILNTPNCALQIVAR
EGF	1	YACNCVVGYIGER
ELF3	2	TQVLDWISYQVEK, ASWLGEQPQFWSK
ITGAV	19	ILACAPLYHWR, MFLLVGAPK, IYIGDDNPLTLIVK, VDLAVLAAVEIR, LTPITIFMEYR, YDPNVYSIK, VLLGGPGSFYWQGQLISDQVAEIVSK, CQPIEFDATGNR, SQDIDADGQGFCQGGFSIDFTK, AMLHLQWPYK, SHQWFGASVR, SLLWTETFMNK, AQNQGEGAYEAELIVSIPLQADFIGVVR, GGLMQCEELIAYLR, QVVCDLGNPMK, QEREPVGTCFLQDGTK, ENQNHSYSLK, DLALSEGDIHTLGCGVAQCLK, SSASFNVIEFPYK
ITGB1	7	IGFGSFVEK, SGEPQTFTLK, DNTNEIYSGK, TVMPYISTTPAK, GICECGVCK, LKPEDITQIQPQQLVLR, FCECDNFNCDR
ITGB6	5	DSGNILQLIISAYEELR, VGDTASFSVTVNIPHCER, LGFGSFVEKPVSPFVK, ISANIDTPEGGFDAIMQAAVCK, TTPEEIANPCSSIPYFCLPTFGFK
KRT17	2	YCVQLSQIQGLIGSVEEQLAQLR, TMQALEIELQSQLSMK
KRT20	12	LGTTPSVYGGAGGR, GTEVQLTELR, TVVQEVVDGK, TTEYQLSTLEER, VFDDLTLHK, MAMQNLNDR, SLSSSLQAPVVSTVGMQR, QWYETNAPR, CVLQIDNAK, LTVEADLQGLNK, GTEVQLTELRR, ESLEHTLEETK
MIA	3	LGYFPSSIVR, LGYFPSSIVREDQTLKPGK, GQVVYVFSK
MMP2	3	LIADAWNAIPDNLDAVVDLQGGGHSYFFK, YESCTSAGR, QDIVFDGIAQIR
MMP3	4	TYFFVEDKYWR, LEPELHLISSFWPSLPSGVDAAYEVTSK, GEDTSMNLVQK, NSMEPGFPK
MMP9	13	AFALWSAVTPLTFTR, SYSACTTDGR, QSTLVLFPGDLR, AVIDDAFAR, SLGPALLLLQK, FQTFEGDLK, EYSTCTSEGR, MFPGVPLDTHDVFQYR, FGNADGAACHFPFIFEGR, DKLFGFCPTR, SDGLPWCSTTANYDTDDRFGFCPSER, QLAEEYLYR, LGLGADVAQVTGALR
MUC1	4	YVPPSSTDR, DISEMFLQIYK, QGGFLGLSNIK, NYGQLDIFPAR
PFN1	8	DSPSVWAAVPGK, DSLLQDGEFSMDLR, TFVNITPAEVGVLVGK, TFVNITPAEVGVLVGKDR, STGGAPTFNVTVTK, TDKTLVLLMGK, SSFYVNGLTLGGQK, CYEMASHLR
PLAUR	3	LWEEGEELELVEK, SPEEQCLDVVTHWIQEGEEGRPK, ITSLTEVVCGLDLCNQGNSGR
PTEN	4	YVYYYSYLLK, TGVMICAYLLHR, EDKFMYFEFPQPLPVCGDIK, ADNDKEYLVLTLTK
S100A8	2	LLETECPQYIR, ALNSIIDVYHK
S100A9	1	LGHPDTLNQGEFK
SATB1	2	EEDPKTASQSLLVNLR, AMQNFLQLPEAER
TIMP1	4	GFQALGDAADIR, EPGLCTWQSLR, FVYTPAMESVCGYFHR, SEEFLIAGK
TYMS	1	EEGDLGPVYGFQWR

## Sheet: Biological-library DIA-MS
Genes	Number of Unique Peptides	List of Peptides
C1QC	3	FQSVFTVTR, TNQVNSGGVLLR, QTHQPPAPNSLIR
CEACAM5	6	QIIGYVIGTQQATPGPAYSGR, SDLVNEEATGQFR, TLTLFNVTR, CETQNPVSAR, AYVCGIQNSVSANR, RSDSVILNVLYGPDAPTISPLNTSYR
CPQ	2	LALLVDTVGPR, VGALASLIR
ITGAV	7	MFLLVGAPK, YDPNVYSIK, CQPIEFDATGNR, SSASFNVIEFPYK, AGTQLLAGLR, TCSLPGTALK, QVVCDLGNPMK
ITGB1	11	GCPPDDIENPR, SAVTTVVNPK, DNTNEIYSGK, SGEPQTFTLK, LKPEDITQIQPQQLVLR, TVMPYISTTPAK, GICECGVCK, IGFGSFVEK, GEVFNELVGK, SLGTDLMNEMR, FCECDNFNCDR
KPNA2	2	TGVVPQLVK, LLGASELPIVTPALR
KRT20	11	LGTTPSVYGGAGGR, GTEVQLTELR, TTEYQLSTLEER, TVVQEVVDGK, CVLQIDNAK, MAMQNLNDR, VFDDLTLHK, SLSSSLQAPVVSTVGMQR, LTVEADLQGLNK, GTEVQLTELRR, TDLEIQIEELNK
MMP2	1	FQGTSYDSCTTEGR
MMP9	6	SLGPALLLLQK, AVIDDAFAR, QSTLVLFPGDLR, FQTFEGDLK, QLSLPETGELDSATLK, QLAEEYLYR
MUC1	4	YVPPSSTDR, QGGFLGLSNIK, DISEMFLQIYK, NYGQLDIFPAR
PFN1	7	STGGAPTFNVTVTK, DSPSVWAAVPGK, TFVNITPAEVGVLVGK, DSLLQDGEFSMDLR, TFVNITPAEVGVLVGKDR, TDKTLVLLMGK, CYEMASHLR
S100A8	3	ALNSIIDVYHK, LLETECPQYIR, KLLETECPQYIR
S100A9	4	LGHPDTLNQGEFK, NIETIINTFHQYSVK, TCKMSQLER, VIEHIMEDLDTNADK
TIMP1	3	GFQALGDAADIR, EPGLCTWQSLR, SEEFLIAGK
TP53	1	ALPNNTSSSPQPK

## Sheet: Library-free DIA-MS
Gene	Number of Unique Peptides	List of Peptides
C1QC	2	FQSVFTVTR, TNQVNSGGVLLR
CEACAM5	7	SDLVNEEATGQFR, TLTLFNVTR, QIIGYVIGTQQATPGPAYSGR, CETQNPVSAR, SDSVILNVLYGPDAPTISPLNTSYR, AYVCGIQNSVSANR, SDPVTLDVLYGPDTPIISPPDSSYLSGANLNLSCHSASNPSPQYSWR
CPQ	4	LALLVDTVGPR, LVLWTAEEQGGVGAFQYYQLHK, VGALASLIR, SVASFSIYSPHTGIQEYQDGVPK
CXCL10	1	SLEKLEIIPASQFCPR
EGF	1	YACNCVVGYIGER
ELF3	2	LVFGPLGDQLHAQLR, ASWLGEQPQFWSK
ITGAV	10	YDPNVYSIK, VDLAVLAAVEIR, MFLLVGAPK, VLLGGPGSFYWQGQLISDQVAEIVSK, LTPITIFMEYR, IYIGDDNPLTLIVK, ILACAPLYHWR, AQNQGEGAYEAELIVSIPLQADFIGVVR, AGTQLLAGLR, AMLHLQWPYK
ITGB1	10	IGFGSFVEK, SGEPQTFTLK, TVMPYISTTPAK, GCPPDDIENPR, SAVTTVVNPK, GEVFNELVGK, LKPEDITQIQPQQLVLR, DNTNEIYSGK, GICECGVCK, SLGTDLMNEMR
ITGB6	4	DSGNILQLIISAYEELR, VGDTASFSVTVNIPHCER, LGFGSFVEKPVSPFVK, TTPEEIANPCSSIPYFCLPTFGFK
KPNA2	1	STNENANTPAAR
KRT17	1	YCVQLSQIQGLIGSVEEQLAQLR
KRT20	11	LGTTPSVYGGAGGR, GTEVQLTELR, TTEYQLSTLEER, TVVQEVVDGK, VFDDLTLHK, MAMQNLNDR, SLSSSLQAPVVSTVGMQR, LTVEADLQGLNK, ESLEHTLEETK, CVLQIDNAK, QNNEYHILLDIK
MIA	3	LGYFPSSIVR, LGYFPSSIVREDQTLKPGK, LFWGGSVQGDYYGDLAAR
MMP3	2	GIHTLGFPPTVR, TYFFVEDKYWR
MMP9	11	AVIDDAFAR, SYSACTTDGR, FQTFEGDLK, SLGPALLLLQK, QSTLVLFPGDLR, EYSTCTSEGR, AFALWSAVTPLTFTR, MFPGVPLDTHDVFQYR, FGNADGAACHFPFIFEGR, SDGLPWCSTTANYDTDDRFGFCPSER, LGLGADVAQVTGALR
MUC1	3	YVPPSSTDR, QGGFLGLSNIK, DISEMFLQIYK
PFN1	6	STGGAPTFNVTVTK, TFVNITPAEVGVLVGK, DSPSVWAAVPGK, DSLLQDGEFSMDLR, TFVNITPAEVGVLVGKDR, AGWNAYIDNLMADGTCQDAAIVGYK
PLAUR	2	LWEEGEELELVEK, ITSLTEVVCGLDLCNQGNSGR
PTEN	2	TGVMICAYLLHR, YVYYYSYLLK
S100A8	2	ALNSIIDVYHK, LLETECPQYIR
S100A9	4	NIETIINTFHQYSVK, VIEHIMEDLDTNADK, TCKMSQLER, LGHPDTLNQGEFK
TIMP1	5	GFQALGDAADIR, EPGLCTWQSLR, SEEFLIAGK, FVYTPAMESVCGYFHR, LQSGTHCLWTDQLLQGSEK
TYMS	1	EEGDLGPVYGFQWR
