# Supplementary material
Source: Research Square preprint supplement (doi:10.21203/rs.3.rs-9258373/v1)
Supplement: Supplementary file 1 [file ab7e631a9aa4bf38b11c6d00.docx]

| **DIA-MS** | **Peptide number** | **Peptide Sequence (Protein)** |
| --- | --- | --- |
| **Biological-rPSL DIA-MS**  **rPSL DIA-MS**  **Biological-Library DIA-MS**  **Library-free DIA-MS** | **48** | CETQNPVSAR (**CEACAM5**), IGFGSFVEK **(ITGB1)**, DSLLQDGEFSMDLR **(PFN1)**, STGGAPTFNVTVTK (**PFN1)**, GFQALGDAADIR **(TIMP1)**, FQSVFTVTR **(C1QC)**, LLETECPQYIR **(S100A8)**, SAVTTVVNPK **(ITGB1)**, EPGLCTWQSLR **(TIMP1)**, GTEVQLTELR **(KRT20)**, VFDDLTLHK **(KRT20)**, GCPPDDIENPR **(ITGB1)**, CVLQIDNAK **(KRT20)**, SYSACTTDGR **(MMP9)**, VGALASLIR **(CPQ)**, MFLLVGAPK **(ITGAV)**, QIIGYVIGTQQATPGPAYSGR **(CEACAM5)**, TNQVNSGGVLLR **(C1QC)**, SDLVNEEATGQFR **(CEACAM5)**, TVMPYISTTPAK **(ITGB1)**, SEEFLIAGK **(TIMP1)**, DNTNEIYSGK **(ITGB1)**, YDPNVYSIK **(ITGAV)**, SLSSSLQAPVVSTVGMQR **(KRT20)**, LALLVDTVGPR **(CPQ)**, LGTTPSVYGGAGGR **(KRT20)**, YVPPSSTDR **(MUC1)**, GEVFNELVGK **(ITGB1)**, DSPSVWAAVPGK **(PFN1)**, TTEYQLSTLEER **(KRT20)**, TDKTLVLLMGK **(PFN1)**, SLGPALLLLQK **(MMP9)**, TFVNITPAEVGVLVGKDR **(PFN1)**, ALNSIIDVYHK **(S100A8)**, QSTLVLFPGDLR **(MMP9)**, TVVQEVVDGK **(KRT20)**, GICECGVCK **(ITGB1)**, FQTFEGDLK **(MMP9)**, SSASFNVIEFPYK **(ITGAV)**, FCECDNFNCDR **(ITGB1)**, AVIDDAFAR **(MMP9)**, TLTLFNVTR **(CEACAM5)**, DISEMFLQIYK **(MUC1)**, AYVCGIQNSVSANR **(CEACAM5)**, QGGFLGLSNIK **(MUC1)**, SGEPQTFTLK **(ITGB1)**, MAMQNLNDR **(KRT20)**, TFVNITPAEVGVLVGK **(PFN1)** |
| **Biological-rPSL DIA-MS**  **rPSL DIA-MS**  **Biological-Library DIA-MS** | **8** | GTEVQLTELRR **(KRT20)**, TCSLPGTALK **(ITGAV)**, SSFYVNGLTLGGQK **(PFN1)**, LKPEDITQIQPQQLVLR **(ITGB1)**, NYGQLDIFPAR **(MUC1)**, INGIPQQHTQVLFIAK **(CEACAM5)**, CQPIEFDATGNR **(ITGAV)**, LNGFEVFAR **(ITGAV)** |
| **Biological-rPSL DIA-MS**  **rPSL DIA-MS**  **Library-free DIA-MS** | **23** | SLEKLEIIPASQFCPR **(CXCL10)**, YACNCVVGYIGER **(EGF)**, TDKWDFYCQ **(MIA)**, LTPITIFMEYR **(ITGAV)**, EYSTCTSEGR **(MMP9)**, LGYFPSSIVR **(MIA)**, GEESAVMLEPR **(CPQ)**, IYIGDDNPLTLIVK **(ITGAV)**, EEGDLGPVYGFQWR **(TYMS)**, DSGNILQLIISAYEELR **(ITGB6)**, LVLWTAEEQGGVGAFQYYQLHK **(CPQ)**, FGNADGAACHFPFIFEGR **(MMP9)**, SDGLPWCSTTANYDTDDRFGFCPSER **(MMP9)**, QWYETNAPR **(KRT20)**, YVYYYSYLLK **(PTEN)**, VDLAVLAAVEIR **(ITGAV)**, LGFGSFVEKPVSPFVK **(ITGB6)**, IVVYNQPYINYSR **(CPQ)**, TYFFVEDKYWR **(MMP3)**, VLLGGPGSFYWQGQLISDQVAEIVSK **(ITGAV)**, VVSSEVKEVEENI **(KRT20)**, AFALWSAVTPLTFTR **(MMP9)**, MFPGVPLDTHDVFQYR **(MMP9)** |
| **Biological-rPSL DIA-MS**  **Biological-Library DIA-MS**  **Library-free DIA-MS** | **6** | LTVEADLQGLNK **(KRT20)**, VIEHIMEDLDTNADK **(S100A9)**, QLSLPETGELDSATLK **(MMP9)**, SLGTDLMNEMR **(ITGB1)**, NIETIINTFHQYSVK **(S100A9)**, LGHPDTLNQGEFK **(S100A9)** |
| **rPSL DIA-MS**  **Biological-Library DIA-MS**  **Library-free DIA-MS** | **1** | QLAEEYLYR **(MMP9)** |
| **Biological-rPSL DIA-MS**  **rPSL DIA-MS** | **24** | SMPPSFGYSMK **(ITGAV)**, LGLGADVAQVTGALR **(MMP9)**, AMQNFLQLPEAER **(SATB1)**, TQVLDWISYQVEK **(ELF3)**, HILPLTNDAER **(ITGB6)**, ASGDFQTTK **(ITGAV)**, TGVMICAYLLHR **(PTEN)**, QSQHMTEVVR **(TP53)**, GQVVYVFSK **(MIA)**, ILACAPLYHWR **(ITGAV)**, LEVSVDSDQK **(ITGAV)**, AMLHLQWPYK **(ITGAV)**, FQGTSYDSCTTEGR **(MMP2)**, TMQALEIELQSQLSMK **(KRT17)**, TLWENLSMIR **(SATB1)**, SHQWFGASVR **(ITGAV)**, KAELAATLGLSER **(CDX2)**, DKLTPITIFMEYR **(ITGAV)**, QDIVFDGIAQIR **(MMP2)**, ESLEHTLEETK **(KRT20)**, GGLMQCEELIAYLR **(ITGAV)**, TLTLNFTISNLQYSPDMGK **(MUC16)**, YCVQLSQIQGLIGSVEEQLAQLR **(KRT17)**, SPEEQCLDVVTHWIQEGEEGRPK **(PLAUR)** |
| **Biological-rPSL DIA-MS**  **Biological-Library DIA-MS** | **11** | EKQPPIDNIIR **(KPNA2)**, ALPNNTSSSPQPK **(TP53)**, TLGMVYIYDGK **(ITGAV)**, ITPNNNGTYACFVSNLATGR **(CEACAM5)**, QVVCDLGNPMK **(ITGAV)**, FLSLPQPER **(SATB1)**, KLLETECPQYIR **(S100A8)**, CYEMASHLR **(PFN1)**, EGVHGGLINK **(PFN1)**, LVFGPLGDQLHAQLR **(ELF3)**, LLGASELPIVTPALR **(KPNA2)** |
| **rPSL DIA-MS**  **Biological-Library DIA-MS** | **1** | AGTQLLAGLR **(ITGAV)** |
| **rPSL DIA-MS**  **Library-free DIA-MS** | **3** | ASWLGEQPQFWSK **(ELF3)**, TKSTGGAPTFNVTVTK **(PFN1)**, FVYTPAMESVCGYFHR **(TIMP1)** |
| **Biological-rPSL DIA-MS** | **20** | YGNADGEYCKFPFLFNGK (**MMP2**), QKFQSVFTVTR **(C1QC)**, GIHTLGFPPTVR **(MMP3)**, LEIIPASQFCPR **(CXCL10)**, GEPGIPAIPGIR **(C1QC)**, FVVAEQTPSCVCDEGYIGAR **(BTC)**, SLLWTETFMNK **(ITGAV)**, KPLDGEYFTLQIR **(TP53)**, AIINLAVYGK **(CPQ)**, LKWIQEYLEK **(CXCL12)**, NLYLSCVLK **(IL1B)**, LQEVGQVSVSLQR **(ITGAV)**, LNATHCQYNFPQVGR **(CXCR3)**, TAADTTGLQPILNQFTPANISR **(ITGAV)**, SLVMSGPYELK **(IL1B)**, RNSMEPGFPK **(MMP3)**, LYEGEADIMISFAVR **(MMP3)**, GAAPPKQEFLDIEDP **(TIMP2)**, WDTGENPIYK **(ITGB1)**, AFQVWSDVTPLR **(MMP2)** |
| **rPSL DIA-MS** | **27** | NGYPDLIVGAFGVDR **(ITGAV)**, VDAAFNWSK **(MMP2)**, VGDTASFSVTVNIPHCER **(ITGB6)**, VEYLDDRNTFR **(TP53)**, SDPVTLDVLYGPDTPIISPPDSSYLSGANLNLSCHSASNPSPQYSWR **(CEACAM5)**, GGLMQCEELIAYLRDESEFR **(ITGAV)**, QIAEDFPGIDSK **(MMP3)**, GATDIDKNGYPDLIVGAFGVDR **(ITGAV)**, IYSSNSGPTR **(PTEN)**, NVLSLTNKGEVFNELVGK **(ITGB1)**, LIADAWNAIPDNLDAVVDLQGGGHSYFFK **(MMP2)**, DAVDSAVEK **(MMP3)**, DADIVIQFGVAEHGDGYPFDGK **(MMP9)**, LDSDTLEVMR **(MMP3)**, ITSLTEVVCGLDLCNQGNSGR **(PLAUR)**, NSMEPGFPK **(MMP3)**, ADNDKEYLVLTLTK **(PTEN)**, FLGLEVTGKLDSDTLEVMR **(MMP3)**, TTPEEIANPCSSIPYFCLPTFGFK **(ITGB6)**, KGIVYIFNGR **(ITGAV)**, EAPDSLFAVR **(FOXP3)**, CDDLEALKK **(ITGB1)**, LLPENNVLSPLPSQAMDDLMLSPDDIEQWFTEDPGPDEAPR **(TP53)**, GEDTSMNLVQK **(MMP3)**, VEECALGQDLCR **(PLAUR)**, IVNYTPDLPK **(MMP3)**, EEDPKTASQSLLVNLR **(SATB1)** |
| **Biological-Library DIA-MS** | **7** | QTHQPPAPNSLIR (**C1QC**), QPPIDNIIR (**KPNA2**), VSAGNGGSSLSYTNPAVAATSANL (**MUC1**), GKMLLFSGR (**MMP9**), ISSLQTTEK (**ITGAV**), DKLFGFCPTR (**MMP9**), RSDSVILNVLYGPDAPTISPLNTSYR (**CEACAM5**) |
| **Library-free DIA-MS** | **2** | YSLRDEFPLLTTK (**TYMS**), MPEAAPPVAPAPAAPTPAAPAPAPSWPLSSSVPSQK (**TP53**) |
