# Supplementary material
Source: Research Square preprint supplement (doi:10.21203/rs.3.rs-9258373/v1)
Supplement: Supplementary file 2 [file 1efb739144cd242d746ad8fb.xlsx]

## Sheet: Library-free DIANN
Gene	Number of Unique Peptides Quantified	Peptide Sequence	Proteotypicity
IGLV4-69	1	FSGSSSGAER	1
IGLV8-61	2	FSGSILGNK	1
		TLIYSTNTR	1
IGLV4-60	1	FSGSSSGADR	1
IGLV2-18	1	VSWYQQPPGTAPK	1
IGKV3D-15	1	LLIYGASIR	1
IGHV1-45	1	SEDTAMYYCAR	1
IGHV6-1	1	ITINPDTSK	1
IGHV3-15	1	TDGGTTDYAAPVK	1
IGLV9-49	1	FSVLGSGLNR	1
IGHV3-72	1	TEDTAVYYCAR	1
IGKV3D-20	1	LLIYDASSR	1
IGHV4-28	1	VTMSVDTSK	1
IGHV3-35	1	AEDTAVYYCVR	1
IGHV3-38	1	AEGTAVYYCAR	1
IGKV1-8	1	MTQSPSSFSASTGDR	1
UBA6	4	LETGQFLTFR	1
		NFALLGVGTSK	1
		TVFFESLER	1
		VVQTDETAR	1
ESYT2	6	ALALLEDEER	1
		EPTPSIASDISLPIATQELR	1
		SSSSLLASPGHISVK	1
		VDVGQQPLR	1
		VGNQIFQSR	1
		VLVALASEELAK	1
SHTN1	2	LTQQLEEER	1
		SMPVLGSVSSVTK	1
C1orf226	1	ASSPSLIER	1
NDUFAF8	1	LAACGAEAAAYGR	1
NBAS	1	VAGENPEER	1
VWA8	1	VIALGLPVPR	1
VPS37C	1	NLEFQGPLEISR	1
CNOT1	7	DAIAALGLLQK	1
		EVTAAQVAR	1
		ILPDSGGVAK	1
		IVEPPENIQEK	1
		LPDPFTPNLK	1
		SNLQVSNEPGNR	1
		SPVTFLSDLR	1
FAM83G	1	SAADSVQSSTR	1
PGP	2	FIAGTGCLVR	1
		GETAVPGAPEALR	1
FBLL1	1	TNIIPVLEDAR	1
EPOP	1	GFALDTPSLR	1
SMCHD1	1	ANLGVFSVFAPR	1
CBY3	1	NPEVIPTAAAR	1
UNC119B	1	LMIENPYETR	1
PCP4L1	1	TSPATNQAAGQEEK	1
C16orf96	1	APSPPSQSLYDR	1
CLCA1	13	ALGGVNAAR	1
		CSAGITGTNVVK	1
		FPSPLVVYANIR	1
		GCEFVLQSR	1
		ISTSILDLR	1
		LAEYGPQGR	1
		LPAAASGGTSICSGLR	1
		MAYLQIPGIAK	1
		NVAILIPETWK	1
		TSSGGSFVASDVPNAPIPDLFPPGQITDLK	1
		TTPMTTQPPNPTFSLLQIGQR	1
		WGVFDEYNNDEK	1
		YFTTYDTNGR	1
NUDT19	1	FGLGPAPFSR	1
CIMAP1B	1	APAFTFGAR	1
MYO1G	2	LLYNSTDPTLR	1
		VIGFSPEEVESVHR	1
SPATA31C2	1	TPDPLACSPPPPK	1
TDRD15	1	TPVSSCTIK	1
TMEM238	1	APPPPAAGSR	1
C4orf54	1	ISGGGGGGK	1
PROB1	1	SPVGPAGVR	1
C3orf80	1	GGVAAEPDGGEGRYPLI	1
C19orf84	1	AGGPGAGPR	1
DNASE2	1	ALINSPEGAVGR	1
AGPS	1	TIISLDTSQMNR	1
KIF2A	1	AALQEEEQASK	1
PDLIM1	6	DFEQPLAISR	1
		LVGGKDFEQPLAISR	1
		SAMPFTASPASSTTAR	1
		VAASIGNAQK	1
		VTPPEGYEVVTVFPK	1
		VWSPLVTEEGK	1
ACOT7	3	LMDEVAGIVAAR	1
		MIEEAGAIISTR	1
		VLEVPPVVYSR	1
MYO1C	10	DGTIDFTPGSELLITK	1
		DNYPQSVPR	1
		DQAVMISGESGAGK	1
		LGTDEISPR	1
		LLQSNPVLEAFGNAK	1
		LLSVEGSTLR	1
		NPQSYLYLVK	1
		TLFATEDALEVR	1
		VLQALGSEPIQYAVPVVK	1
		VTMESALTAR	1
MYO1F	4	GFGDLAVLK	1
		GPPSTSLGASR	1
		VVMQNENER	1
		YAILTPETWPR	1
SNAP23	3	IEEGLDQINK	1
		ILGLAIESQDAGIK	1
		TITMLDEQK	1
AIP	2	GELPDFQDGTK	1
		VLELDPALAPVVSR	1
CCL24	1	VVSYQLSSR	1
GTPBP1	1	LVLVSPTSEQYDSLLR	1
LGALS9	2	NTQIDNSWGSEER	1
		SILLSGTVLPSAQR	1
STXBP3	3	IENESDMIR	1
		SAEETFQLSR	1
		VLLPVLLNK	1
AP3B1	3	LLDSITVPVAR	1
		NVEVIELAK	1
		QFAAATIQTIGR	1
NDUFS8	1	EPATINYPFEK	1
PSMD11	7	AQSLLSTDR	1
		DIQENDEEAVQVK	1
		EASIDILHSIVK	1
		EQSILELGSLLAK	1
		LYDNLLEQNLIR	1
		TGQAAELGGLLK	1
		TTANAIYCPPK	1
PSMD12	6	AIYDTPCIQAESEK	1
		DPNNLLNDWSQK	1
		LFTTMELMR	1
		LNSLMSLVNK	1
		TASDMVSTSR	1
		VEFILEQMR	1
PSMD9	4	ANYDVLESQK	1
		GIGMNEPLVDCEGYPR	1
		LGQSESQGPPR	1
		SDVDLYQVR	1
PGRMC1	2	FYGPEGPYGVFAGR	1
		GDQPAASGDSDDDEPPPLPR	1
SUPT5H	4	DNELIGQTVR	1
		DVTNFTVGGFAPMSPR	1
		QAIEGVGNLR	1
		VVSISSEHLEPITPTK	1
TAF4	2	GAAGAVTQSLSR	1
		TPTATTSGIR	1
DFFA	5	AAFGEEVDAVDTGISR	1
		ACDILAIDK	1
		ASPPGDLQNPK	1
		ETSSDVALASHILTALR	1
		TETVQEACER	1
HIP1	1	SVSVTAAGQCR	1
CLIC1	7	EEFASTCPDDEEIELAYEQVAK	1
		GFTIPEAFR	1
		GVTFNVTTVDTK	1
		IGNCPFSQR	1
		LAALNPESNTAGLDIFAK	1
		NSNPALNDNLEK	1
		VLDNYLTSPLPEEVDETSAEDEGVSQR	1
EIF3F	5	AYVSTLMGVPGR	1
		TMGVMFTPLTVK	1
		VIGLSSDLQQVGGASAR	1
		VIGTLLGTVDK	1
		VSADNTVGR	1
WWP2	2	DSSGTAVAPENR	1
		TTPATGEQSPGAR	1
PDHX	3	LTEDEEGNAK	1
		QLITVTMSSDSR	1
		VVDDELATR	1
QSOX1	4	DFNIPGFPTVR	1
		LAGAPSEDPQFPK	1
		SFYTAYLQR	1
		VLNTEANVVR	1
WASL	1	QAPPPPPPSR	1
IPO5	7	FLFDSVSSQNVGLR	1
		ITFLLQAIR	1
		LCGDTSLNNMQR	1
		NTTAAEEAR	1
		SLVEIADTVPK	1
		VAAAESMPLLLECAR	1
		VCDIAAELAR	1
SAP18	2	EIGSTMSGR	1
		GTDDSMTLQSQK	1
EML1	1	GDVILIGTTR	1
IGF2BP3	1	LLVPTQFVGAIIGK	1
DNM1L	5	AEELLAEEK	1
		DTLQSELVGQLYK	1
		SATLLQLITK	1
		SSVLESLVGR	1
		YIETSELCGGAR	1
RTCA	2	AFVAGVLPFK	1
		QLNPINLTER	1
GOLIM4	4	EADPESEADR	1
		FQSPYEEQLEQQR	1
		LAVQQVEEAQQLR	1
		QQEQQQQQVAR	1
MANBA	1	LPQSTDPLR	1
AGRN	4	LELGIGPGAATR	1
		SELFGETAR	1
		SFLAFPTLR	1
		STVPVNTNR	1
PLOD2	4	EFIAPVTLK	1
		GGDGINSIGGGQK	1
		IVGPEENLSQAEAR	1
		SEDYVDIVQGNR	1
EXOC5	1	LSDPSDLPR	1
HMGN4	1	DASTLQSQK	1
NR5A2	1	VETEALGLAR	1
PSMD14	1	AVAVVVDPIQSVK	1
BIN1	3	AQPSDNAPAK	1
		GVFPENFTER	1
		LDLPPGFMFK	1
KPNA3	2	DSQVVQVVLDGLK	1
		SGILPILVK	1
LAD1	9	ATASEQPLAQEPPASGGSPATTK	1
		GLPCTELFVAPVGVASK	1
		LPPVTLQVK	1
		NLSSTTDDEAPR	1
		QGASDPPTVASR	1
		QVVEAAQAPIQER	1
		SLAPGMALGSGR	1
		TLEDEEEQER	1
		TQESGDQDPQEAQK	1
FAAH	1	EEVYTSSQPLR	1
VWA5A	7	ASGGTSEFITGK	1
		FVLPAVLNPR	1
		LISYAQLTGR	1
		MLSPEQTVIFR	1
		SGSMQSPMSSQDTSQLR	1
		SSVDPAIFAF	1
		YVQELPLEADGALR	1
PES1	2	LAALSASLAR	1
		LAQEEESEAK	1
SDCBP	1	SLMDHTIPEV	1
DDX3X	2	QSSGASSSSFSSSR	1
		VGNLGLATSFFNER	1
RNASET2	2	ELDLNSVLLK	1
		VCEDGPVFYPPPK	1
PODXL	1	LASVPGSQTVVVK	1
FCN1	1	GDAGQSQSCATGPR	1
PIR	1	TPTLYLDFK	1
TRIM38	1	ASFSDTLRPYFQVYQYSPLFLPPPGD	1
PPP6C	1	LVTVWSAPNYCYR	1
CES2	7	EASQAALQK	1
		FAPPEPPESWSGVR	1
		FTEEEEQLSR	1
		IQELEEPEER	1
		LGVLGFFSTGDK	1
		MIPGVVDGVFLPR	1
		SFFGGNYIK	1
MAN2B1	3	DLFSTFTITR	1
		LPVSEGVFVVK	1
		LQETTLVANQLR	1
FBP2	1	IYSLNEGYAK	1
UBE2C	1	DPAATSVAAAR	1
PDXK	4	AQAGEGVRPSPMQLELR	1
		NPAGSVVMER	1
		VLSIQSHVIR	1
		YDYVLTGYTR	1
ARID1A	3	EEAGGEAAAAAAAER	1
		SAYPPPAPAYALSSPR	1
		TPQPSSPMDQMGK	1
ISLR	2	ALPGTPVASSQPR	1
		LPGLPEGAFR	1
DPYSL4	1	MDENEFVAVTSTNAAK	1
TRAFD1	2	LSNSDSQDIQGR	1
		VTPAAANYR	1
HSPB6	4	APSVALPVAQVPTDPGHFSVLLDVK	1
		ASAPLPGLSAPGR	1
		HFSPEEIAVK	1
		LPPGVDPAAVTSALSPEGVLSIQAAPASAQAPPPAAAK	1
NDUFAB1	1	LMCPQEIVDYIADKK	1
UBFD1	1	LPTVPLSGMYNK	1
COPE	2	DSIVAELDR	1
		LVLQYAPSA	1
AP3D1	3	ASCILQLVK	1
		LLESGDLSMSSIK	1
		VDSCASMYSR	1
CCS	3	ESAQPPAHL	1
		SAGLFQNPK	1
		SLIIDEGEDDLGR	1
ENPP3	1	VQPVSEILQLK	1
ABLIM1	2	FPAAQAPDPSETPK	1
		TLSPTPSAEGYQDVR	1
DVL2	1	AMAAPESGLEVR	1
TOR1B	1	GSAIDEDIVTR	1
STX16	1	LTDAFLLLR	1
ADAM10	2	AIDTIYQTTDFSGIR	1
		TITLQPGSPCNDFR	1
PTGES	1	AFANPEDALR	1
IMPA2	1	VSGETDLSK	1
CDIPT	1	MIDLSGNPVLR	1
PDCD5	4	AVENYLIQMAR	1
		LSNLALVKPEK	1
		NSILAQVLDQSAR	1
		VSEQGLIEILK	1
PRMT5	4	AAILPTSIFLTNK	1
		GPLVNASLR	1
		VPLVAPEDLR	1
		YSQYQQAIYK	1
NHERF1	5	AQEAPGQAEPPAAAEVQGAGNENEPR	1
		EALAEAALESPRPALVR	1
		LLVVDPETDEQLQK	1
		LVEPGSPAEK	1
		SVDPDSPAEASGLR	1
TPP1	1	AYPDVAALSDGYWVVSNR	1
TCERG1	6	ATFSEFAAK	1
		EALFNEFVAAAR	1
		GPPPPPTASEPTR	1
		SSDVSWSDTR	1
		VFFYNPTTR	1
		YLVLDCVPEER	1
APOL1	2	VNEPSILEMSR	1
		VTEPISAESGEQVER	1
POLR3A	2	LAPVYLSNR	1
		TVISPDPNLR	1
PSMA7	3	DIVVLGVEK	1
		ILNPEEIEK	1
		NYTDEAIETDDLTIK	1
SCAMP3	3	AQQEFAAGVFSNPAVR	1
		EPPPAYEPPAPAPLPPPSAPSLQPSR	1
		TAAANAAAGAAENAFR	1
OPLAH	6	DIPLNQGCLAPVR	1
		DQPLDSSHIASIR	1
		EEALLSVLTER	1
		GSILDPSPEAAVVGGNVLTSQR	1
		ITDPEILESR	1
		MGTTVATNALLER	1
AIM2	1	VLDAESDQK	1
BCKDK	1	LTPTMMLYAGR	1
TAX1BP3	1	VSEGGPAEIAGLQIGDK	1
GIPC1	2	GPATVEDLPSAFEEK	1
		NPDELAEALDER	1
HAT1	1	LLVTDMSDAEQYR	1
CASK	4	MLMLDPAER	1
		NPPSDAVQR	1
		NTDEPMGITLK	1
		VGDIIQIISK	1
HGS	2	ALQNAVTTFVNR	1
		VVQDTYQIMK	1
PPP1R12A	7	ETQTDSISR	1
		ITTGSSSAGTQSSTSNR	1
		LAYVAPTIPR	1
		QGVDIEAAR	1
		SGSYSYLEER	1
		STQGVTLTDLQEAEK	1
		YETSSTSAGDR	1
GAK	5	AMLQVNPEER	1
		AVVMTPVPLFSK	1
		GDLDISYITSR	1
		VASTSQEYDK	1
		VIQSVANYAK	1
HNRNPDL	3	MFIGGLSWDTSK	1
		QLAPLLPSLAPSSAR	1
		VFVGGLSPDTSEEQIK	1
XPO1	2	IYLDMLNVYK	1
		QMLPLNTNIR	1
SPTBN2	1	GPAPSAMPQSR	1
SEC16A	8	DAQGQPGLER	1
		GGIGASENLENPPK	1
		GLANPEPAPEPK	1
		NPSSAAPVQSR	1
		QALQSTPLGSSSK	1
		TMATMGDTLASR	1
		TVPDSEAPPGWDR	1
		YGPLPGPAVPR	1
PLXNB2	3	EASPNPEDGIVR	1
		FGAQLQCVTGPQATR	1
		IQPETGPLGGGIR	1
U2SURP	1	FEPPQSDSDGQR	1
SYNJ2	1	TALQVFDPLAK	1
SYNM	25	AALEALLGR	1
		AELQELNAR	1
		ATGPAAPPPR	1
		AVSSQTNVR	1
		DYQDLLQVK	1
		EALGLEQLR	1
		EGLWAEGQAR	1
		EGQGGPGSVSVDVK	1
		ELQEALGAR	1
		ENLLLEEELR	1
		ETVQLYEDEVR	1
		EVPISLEVSQDR	1
		EVPVYIGEDSTIAR	1
		GSQTGTSIGGDAR	1
		LCAQEAEALR	1
		LDAELGAQQR	1
		LGPTETETSEHIAIR	1
		NDQAVGVSFK	1
		SGEFHAEPTVIEK	1
		SPAPGSPDEEGGAEAPAAGIR	1
		TFSPTYGLLR	1
		TFVLAGSADSPELGK	1
		TQEAGALGVSDR	1
		VAAGASESTR	1
		YSWQDEIVQGTR	1
PFAS	6	AFSITQGLLK	1
		ATGLGPVDR	1
		ELSDPAGAIIYTSR	1
		FGEPVLAGFAR	1
		SLGLQLPDGQR	1
		VGPGPALMLR	1
MCF2L	1	AILDAASQK	1
ANKRD28	2	TPLDLAAFK	1
		TVSFEALPIMR	1
FYB1	3	FGTPASLTTR	1
		SGPTPPTSENEQK	1
		VTGPNSSSGIQAR	1
NPC1	1	DVEAPSSNDK	1
SCAMP1	1	AQQEFATGVMSNK	1
SCAMP2	2	AASSAAQGAFQGN	1
		ELQNTVANLHVR	1
ARPC1B	2	ASSEGGTAAGAGLDSLHK	1
		NSVSQISVLSGGK	1
ARPC2	7	DDETMYVESK	1
		DNTINLIHTFR	1
		DSIVHQAGMLK	1
		IIEETLALK	1
		NCFASVFEK	1
		VTVVFSTVFKDDDDVVIGK	1
		YFQFQEEGK	1
ARPC3	1	LIGNMALLPIR	1
POLR1C	3	FSPVATASYR	1
		ILLAEVPTMAVEK	1
		VVLGEFGVR	1
PLSCR1	2	SLDEQCVVGK	1
		VYFAAEDTDCCTR	1
PGRMC2	2	FYGPAGPYGIFAGR	1
		GLGAGAGAGEESPATSLPR	1
VILL	2	LPEEVPSFQPR	1
		SPATPIVLVK	1
ADAMDEC1	1	VVPSASTTFDNFLR	1
PFDN6	1	ETLAQLQQEFQR	1
LAMA5	8	AIEASNAYSR	1
		AVAAEAQDTATR	1
		DDAAICTTEYSR	1
		GQLQLVEGNFR	1
		IAASATCGEEAPAR	1
		LVGGPVAGGDPNQTIR	1
		VGFEGATCDR	1
		VSSYGGTLR	1
ZNF185	1	SQDPPALAR	1
MRPS12	1	GVVLCTFTR	1
VGF	1	VNLESPGPER	1
SURF4	1	SMFAGVPTMR	1
MAPK13	3	ASPQAADLLEK	1
		EIVNFSPIAR	1
		SYIQSLPQTPR	1
OGT	3	AATGEEVPR	1
		DSGNIPEAIASYR	1
		IIFSPVAPK	1
PMM2	5	IGVVGGSDFEK	1
		NGMLNVSPIGR	1
		TMGYSVTAPEDTR	1
		TMGYSVTAPEDTRR	1
		VQEQLGNDVVEK	1
MID1	1	ASVSGPNSPSETR	1
HMGB3	3	MSAYAFFVQTCR	1
		NPEVPVNFAEFSK	1
		STNPGISIGDVAK	1
PPM1G	4	ALEDAFLAIDAK	1
		AYTGFSSNSER	1
		NTAELQPESGK	1
		QLIVANAGDSR	1
EIF3D	3	DMPYQPFSK	1
		GAVIATELK	1
		LGDDIDLIVR	1
EIF3H	4	EFTAQNLGK	1
		EGTGSTATSSSSTAGAAGK	1
		GEPPLPEEDLSK	1
		VDEMSQDIVK	1
STX7	5	EFGSLPTTPSEQR	1
		ITQCSVEIQR	1
		QQYTNQLAK	1
		TLNQLGTPQDSPELR	1
		VSGSFPEDSSK	1
P4HA2	2	QLDAGEEATTTK	1
		TGVLTVASYR	1
CAPN5	2	AVTAADMEAR	1
		VFTDVPSNCR	1
YKT6	4	LYSLSVLYK	1
		NDSLAGVVIADNEYPSR	1
		SEVLGTQSK	1
		VQAELDETK	1
ARPC5	3	ALAAGGVGSIVR	1
		QGNMTAALQAALK	1
		VDVDEYDENK	1
POLR2D	1	ALIPSLEGR	1
TAPBP	3	FVPLPASAK	1
		VSLMPATLAR	1
		WASGLTPAQNCPR	1
RNF113A	1	DTSMGNASSGMVR	1
CLDN3	2	DFYNPVVPEAQK	1
		STGPGASLGTGYDR	1
DHX15	13	ASTNAMLISAGLPPLK	1
		EAMNDPLLER	1
		EVDDLGPEVGDIK	1
		IIPLYSTLPPQQQQR	1
		LDLGEDYPSGK	1
		LQLPVWEYK	1
		SLMSADNVR	1
		SNLGSVVLQLK	1
		TEMQDNTYPEILR	1
		TLATDILMGVLK	1
		TTQIPQWCVEYMR	1
		VAAMSVAQR	1
		VESLLVTAISK	1
CYB5B	1	GQEVETSVTYYR	1
PRPF4	3	ALGEPITLFGEGPAER	1
		APDDLVAPVVK	1
		DVNLASCAADGSVK	1
PHGDH	6	AGTGVDNVDLEAATR	1
		GGIVDEGALLR	1
		GTIQVITQGTSLK	1
		QIPQATASMK	1
		TLGILGLGR	1
		VTADVINAAEK	1
NDUFS4	1	LDITTLTGVPEEHIK	1
SEPTIN4	1	VNIVPILAK	1
DYNC1LI2	4	GGPASVPSSSPGTSVK	1
		NILVFGEDGSGK	1
		TGSPGSPGAGGVQSTAK	1
		TVLSNVQEELDR	1
PSMD3	9	AIQLEYSEAR	1
		AVQGFFTSNNATR	1
		EEAATGGGSTGEADGK	1
		EMIDIYSTR	1
		EQQDLEFAK	1
		FNQVLDQFGEK	1
		ISLADIAQK	1
		LQLDSPEDAEFIVAK	1
		TAAAAAEHSQR	1
PAPSS1	2	DIVPVDASYEVK	1
		TDAETLPALK	1
ZW10	1	DSVVLSLLK	1
SPINT1	3	GSSGAQATFPQGPSMER	1
		TQGFGGSGIPK	1
		VQPQEPLVLK	1
SART1	5	EAAGTTAAAGTGGATEQPPR	1
		IEYVDETGR	1
		LEQGGTADGLR	1
		LQAQSLSTVGPR	1
		SLPSAVYCIEDK	1
SPINT2	1	NAADSSVPSAPR	1
TGFB1I1	4	ASATSATLELDR	1
		DFLQLFAPR	1
		GSLCATCGLPVTGR	1
		LMASLSDFR	1
HSPA12A	3	ETAPTSAYSSPAR	1
		LDLTGTSGTAVPAR	1
		TPTTILLTPER	1
EEF1E1	1	AIVQQWLEYR	1
HNRNPR	6	DLYEDELVPLFEK	1
		ENILEEFSK	1
		GYAFITFCGK	1
		LMMDPLSGQNR	1
		NLATTVTEEILEK	1
		TLIEAGLPQK	1
PRPF3	3	LGLMPPPEPK	1
		QLSFISPPTPQPK	1
		VLGTEAVQDPTK	1
TXNL1	4	GYMDLMPFINK	1
		IAPAFSSMSNK	1
		IDQYQGADAVGLEEK	1
		SMDFEEAER	1
TPD52L2	7	GLLSDSMTDVPVDTGVAAR	1
		LGLSTLGELK	1
		TPAVEGLTEAEEEELR	1
		TPAVEGLTEAEEEELRAELTK	1
		TQETLSQAGQK	1
		TSAALSTVGSAISR	1
		VEEEIVTLR	1
EMC8	2	DASPNQVAEK	1
		ISASLLDSR	1
EIF4G3	1	VGVESTLER	1
PPIH	3	GPFADENFK	1
		IELFADVVPK	1
		IIDGLLVMR	1
MGAM	1	QLDFTLSPK	1
HTRA2	2	EPLPTLPLGR	1
		TQSQLAVQIR	1
AKR7A2	3	ALQAAYGASAPSVTSAALR	1
		MDAPASAAAVR	1
		VASVLGTMEMGR	1
PROM1	4	LSLSQLNSNPELR	1
		MNYDSYLAQTGK	1
		QTTTVVAGIK	1
		TLLNETPEQIK	1
EPB41L2	14	DSSQLGTDATK	1
		EEPLPEEQR	1
		EISPGSGPGEIR	1
		EQHPDMSVTR	1
		EVPIVQTETK	1
		GDAEEMAQK	1
		GLSPAQADSQFLENAK	1
		GSQPPPAAESQSSLR	1
		IVITGDGDIDHDQALAQAIR	1
		LVSPEQPPK	1
		SLDGAPIGVMDQSLMK	1
		TEMVTISDASQR	1
		VEGDNIYVR	1
		VEMQPTELVSK	1
TGOLN2	4	SGAEAQTPEDSPNR	1
		SGAEEQGPIDGPSK	1
		SSAEAQTPEDTPNK	1
		SSEPTEDVEPK	1
WIPF1	4	ALPATPQLPSR	1
		GAPPLPPIPR	1
		NLSLSSSTPPLPSPGR	1
		SGPLPPPPPVSR	1
SGCE	1	EVENPQNQLR	1
RGS14	1	SAAQPIGGSLNSTTDSAL	1
DENR	1	QEAGISEGQGTAGEEEEK	1
XPOT	2	ALAYFEQLK	1
		ASALQDMMR	1
DNPH1	1	YFEADPPGQVAASPDPTT	1
TIMM44	1	VTDLLGGLFSK	1
CHMP2A	1	ANIQAVSLK	1
NCK2	2	GVEGDFLIR	1
		TGYVPSNYVER	1
PLRG1	1	TAPSGSEYR	1
RGS10	1	ASSQVNVEGQSR	1
ZNF207	1	ETIDAVPNAIPGR	1
NDUFA2	2	ALENVLSGK	1
		ANPDLPILIR	1
GET3	2	LEETLPVIR	1
		LLNFPTIVER	1
BUB3	6	LNQPPEDGISSVK	1
		LYDVPANSMR	1
		QGYVLSSIEGR	1
		TPCNAGTFSQPEK	1
		VAVEYLDPSPEVQK	1
		VYTLSVSGDR	1
PLPP2	1	GNPADVTEAR	1
SULT1B1	5	FDAIYETEMSK	1
		NLNDEILDR	1
		NYFTVAQNEK	1
		TSGIEQLEK	1
		VPMLEMTLPGLR	1
ACTN4	18	ACLISLGYDVENDR	1
		AGTQIENIDEDFR	1
		DDPVTNLNNAFEVAEK	1
		DHALLEEQSK	1
		DYETATLSDIK	1
		ETTDTDTADQVIASFK	1
		GISQEQMQEFR	1
		KDDPVTNLNNAFEVAEK	1
		LSGSNPYTTVTPQIINSK	1
		LSNRPAFMPSEGK	1
		LVSIGAEEIVDGNAK	1
		MAPYQGPDAVPGALDYK	1
		MLDAEDIVNTARPDEK	1
		NFITAEELR	1
		QFASQANVVGPWIQTK	1
		SFSTALYGESDL	1
		STLPDADRER	1
		VLAGDKNFITAEELR	1
GATC	3	LALVDFGSR	1
		LDEQEPFPHS	1
		VVEEYFVAPPGNISLPK	1
HTATSF1	3	ESEEGNPVR	1
		GWEAFLNAPEANR	1
		TAEEPPQEK	1
AP1G1	4	AVEYNALFK	1
		VLAINILGR	1
		VLTTAGSYVR	1
		YVALTSLLK	1
STX6	1	AVNTAQGLFQR	1
SYNGR2	2	DVLVGADSVR	1
		FLTQPQVVAR	1
SGTA	5	AICIDPAYSK	1
		LGNYAGAVQDCER	1
		MGLALSSLNK	1
		TPPSEEDSAEAER	1
		TPSASNDDQQE	1
ENSA	3	NLVTGDHIPTPQDLPQR	1
		QEEENPAEETGEEK	1
		QLPSAGPDK	1
NARS1	5	EPFPTIYVDSQK	1
		IFDSEEILAGYK	1
		LEDLVCDVVDR	1
		LMTDTINEPILLCR	1
		NDPSLPEPK	1
MYO1B	3	LEDLATLIQK	1
		SEVPLVDVTK	1
		SLPIYSPEK	1
NUDT21	1	TINLYPLTNYTFGTK	1
LANCL1	2	AFPNPYADYNK	1
		SLAEGYFDAAGR	1
STRN	1	SVIDTSTIVR	1
SCO2	1	SAEQISDSVR	1
SLC37A4	1	NLDPMPSEGK	1
IDH3B	1	GELASYDMR	1
NRDC	2	LGADESEEEGR	1
		TVFQFDVQR	1
CALU	2	TFDQLTPEESK	1
		TFDQLTPEESKER	1
AHCYL1	2	TTDVMFGGK	1
		YSFMATVTK	1
CD5L	2	EATLQDCPSGPWGK	1
		LVGGDNLCSGR	1
XPNPEP2	2	LIFPAATSGR	1
		VLIGNIDLSR	1
TYROBP	1	ITETESPYQELQGQR	1
RAD21	2	DVIDEPIIEEPSR	1
		LQESVMEASR	1
AKR1B10	1	IVENIQVFDFK	1
TIMM8A	2	AEACFVNCVER	1
		FIDTSQFILNR	1
GMFG	1	ETDNAAIIMK	1
PPP1R12B	1	LESGGSNPTTSDSYGDR	1
PLIN1	3	ASGAPSAGPEPAPR	1
		DIDNPPAEVER	1
		VVEYLLPPDK	1
PCDH7	1	LAEEGPADVR	1
PRPSAP2	1	VQVYQEPNR	1
SMARCA5	3	EIQEPDPTYEEK	1
		FITDNTVEER	1
		NPELPNAAQAQK	1
SPAG9	3	AGPSAQEPGSQTPLK	1
		SSTLSQLPGDK	1
		VESLESQTR	1
AQR	2	AGMQPGLTMVVGPPGTGK	1
		QDIEDSVSR	1
ATP10A	1	VFPTQLQLAR	1
OPA1	5	GVEVDPSLIK	1
		MLAITANTLR	1
		QQLTNTEVR	1
		TSVLEMIAQAR	1
		VVVVGDQSAGK	1
PIP5K1C	1	SPSETSEQPR	1
MAPKBP1	1	VLGITVSGGR	1
KDM1A	2	IADQFLGAMYTLPR	1
		QATPGVPAQQSPSM	1
TBC1D4	1	ATDPSQVPDVISSIR	1
PPL	1	VVLQQDPQQAR	1
LY75	1	IPENFFEEESR	1
SNX3	2	GDDGIFDDNFIEER	1
		VVVPPLPGK	1
DOK2	1	VAEAGGEASSPR	1
OGA	1	EIPVESIEEVSK	1
SORBS3	2	FGTFPGNYVAPV	1
		QGIFPASYVQVSR	1
SYNCRIP	3	EQILEEFSK	1
		LMMDPLTGLNR	1
		NLANTVTEEILEK	1
NEMF	2	AAEPLLTLER	1
		LTEIVASAPK	1
GMDS	2	FYQASTSELYGK	1
		GYEVHGIVR	1
NMT2	1	AMELLSACQGPAR	1
CCNT1	1	EQLENSPSR	1
GREM1	1	GSQGAIPPPDK	1
PLOD3	6	GLDYEGGGCR	1
		LLLLDYPPDR	1
		LVGPEEALSPGEAR	1
		SEDYVELVQR	1
		TLPGGQPPPR	1
		YDCVISSPR	1
EIF4E2	1	VLNLPPNTIMEYK	1
DIAPH1	5	AMDPAVPNMMIDAAK	1
		DDAMAAVPAK	1
		FQPLLDGLK	1
		NSETFPTILEEAK	1
		SPDELPSAGGDGGK	1
SELENOF	1	FPQVQAFVR	1
EXOC3	3	DIVVPSLNVAK	1
		IEGTQADTR	1
		NIFSVPEIVR	1
PLIN3	8	DTVATQLSEAVDATR	1
		GAVQSGVDK	1
		IATSLDGFDVASVQQQR	1
		LEPQIASASEYAHR	1
		LGQMVLSGVDTVLGK	1
		SVVTGGVQSVMGSR	1
		TLTAAAVSGAQPILSK	1
		VSGAQEMVSSAK	1
SLC16A7	1	VSNAQSVTSER	1
PRMT3	1	ALSAEAALAR	1
KPNA6	3	EPSPPIDEVINTPR	1
		NNALNPEEMR	1
		VSPCLPVLSR	1
UGDH	9	ASVGFGGSCFQK	1
		ESSSIYISK	1
		FSLQDPPNK	1
		IAILGFAFK	1
		ILTTNTWSSELSK	1
		IPYAPSGEIPK	1
		LAANAFLAQR	1
		VLIGGDETPEGQR	1
		VTVVDVNESR	1
CTNND1	7	GSLASLDSLR	1
		GYELLFQPEVVR	1
		LVENCVCLLR	1
		QDVYGPQPQVR	1
		SDFQVNLNNASR	1
		SGDLGDMEPLK	1
		VGGSSVDLHR	1
SNX2	6	AVNTQALSGAGILR	1
		ELSANTAAFAK	1
		QFLESSELPR	1
		QQQFENLDQQLR	1
		SAAMLGNSEDHTALSR	1
		SMSAPVIFDR	1
DPM1	3	EGNFDIVSGTR	1
		LGGNEIVSFLK	1
		YSVLLPTYNER	1
USO1	11	DSEQVAELK	1
		EQDLQLEELR	1
		IVAFENAFER	1
		LMDLLADSR	1
		LSALLQETK	1
		NDGVLLLQALTR	1
		NQELLQSQLTEK	1
		SQLNSQSVEITK	1
		SSQTSGTNEQSSAIVSAR	1
		VASSTLLDDR	1
		VLVSPTNPPGATSSCQK	1
TOM1	4	AGLQSLEASGR	1
		LPNLSSPSAEGPPGPPSGPAPR	1
		SELEMVSGNVR	1
		YEAPQATDGLAGALDAR	1
PFKFB2	2	NSFTPLSSSNTIR	1
		VSSPDYPER	1
CCDC22	2	AVELLPDGTANLAK	1
		LVVPELSSR	1
PRAF2	2	ALDDFVLGSAR	1
		LAAPDPCDPQR	1
EIF5B	5	DAQEMADSLGVR	1
		GLLLPPPMK	1
		IEPIPGESPK	1
		LLQAQGVEVPSK	1
		VTVDTGVIPASEEK	1
ZG16	1	VWSDYVGGR	1
EDF1	1	AIPNNQVLGK	1
DIAPH2	1	LLGAITTAAER	1
BRD4	2	DAQEFGADVR	1
		VQPPTPLLPSVK	1
CUTA	1	TQSSLVPALTDFVR	1
PFDN1	1	LADIQIEQLNR	1
PPP1R11	1	ATLGPTPTTPPQPPDPSQPPPGPMQH	1
WDR1	7	DYSGQGVVK	1
		LATGSDDNCAAFFEGPPFK	1
		LYSILGTTLK	1
		MTVDESGQLISCSMDDTVR	1
		VFASLPQVER	1
		YAPSGFYIASGDVSGK	1
		YEYQPFAGK	1
SLIT1	1	TNPIETSGAR	1
ATP9A	4	LPTAADLLQIR	1
		SSTIPEQLGR	1
		SVMNTSNPR	1
		VPADMIFLR	1
CPNE3	3	SPLGEVAIR	1
		SSPVEFECINEK	1
		VVLFEMEAR	1
ICOSLG	1	GLYDVVSVLR	1
HIP1R	1	SSQEQGELQGR	1
RNF40	3	EGPSLGPPPVASALSR	1
		EMAPVPGTTTTTTSVK	1
		TTTTLIEPIR	1
ZC3H11A	2	EASGETTGVDITK	1
		TVVLPPIVASR	1
CLUH	3	FNPDIFSPGVR	1
		SVEGLQEGSVLR	1
		VVEEPYTVR	1
DNAJC13	2	ADTVGLACEAINR	1
		MQELALSEGALPR	1
PPP6R2	2	AASAMDAVSR	1
		EAPPLPTVAR	1
CNOT3	1	STDSEVSQSPAK	1
COQ9	1	LVQLGQAEK	1
GGCT	6	AIEPNDYTGK	1
		ENGLPLEYQEK	1
		NPSAAFFCVAR	1
		SNLNSLDEQEGVK	1
		SYLMTNYESAPPSPQYK	1
		VSEEIEDIIK	1
NDUFS7	1	VYDQMPEPR	1
SMIM24	1	AEDEEETTFR	1
NDUFS2	4	GSGIQWDLR	1
		LDELEELLTNNR	1
		LVMELSGEMVR	1
		TYLQALPYFDR	1
ZPR1	4	AISGLEQDQPAR	1
		FTTLEGLLK	1
		GALTTVEGLITR	1
		SGGAVEPLGTR	1
NIPSNAP2	2	SGPNIYELR	1
		YEGGYPALTEVMNK	1
PDCD6	4	AGVNFSEFTGVWK	1
		LSDQFHDILIR	1
		QALSGFGYR	1
		YITDWQNVFR	1
TBCA	3	AEDGENYDIK	1
		LEAAYLDLQR	1
		QAEILQESR	1
ATP6V1G1	2	EEAQAEIEQYR	1
		MTILQTYFR	1
VPS4B	1	LLEPVVSMSDMLR	1
MPDU1	1	LLVPILLPEK	1
BCAS1	4	ANFTSQETQGAGK	1
		TGDQAADSSLGSVK	1
		TITPPEPEPTGAPQK	1
		VPGDSQQEAK	1
MACROH2A1	5	AASADSTTEGTPADGFTVLSTK	1
		GVTIASGGVLPNIHPELLAK	1
		LEAIITPPPAK	1
		QTAAQLILK	1
		SIAFPSIGSGR	1
SH3BGRL	8	DIAANEENR	1
		DIAANEENRK	1
		EAEVQAKQQA	1
		ENNAVYAFLGLTAPPGSK	1
		GDYDAFFEAR	1
		QQDVLGFLEANK	1
		VYIASSSGSTAIK	1
		VYIASSSGSTAIKK	1
FLNB	40	AAGSGELGVTMK	1
		ADIEMPFDPSK	1
		AGLAPLEVR	1
		AGPGTLSVTIEGPSK	1
		APSVATVGSICDLNLK	1
		CLATGPGIASTVK	1
		FADEHVPGSPFTVK	1
		FVPQEMGVHTVSVK	1
		GAGIGGLGITVEGPSESK	1
		GEAGVPAEFSIWTR	1
		GIEPTGNMVK	1
		IAGPGLGSGVR	1
		IEYNDQNDGSCDVK	1
		IFAQDGEGQR	1
		IFFAGDTIPK	1
		IPEINSSDMSAHVTSPSGR	1
		LDVTILSPSR	1
		LVSPGSANETSSILVESVTR	1
		SPFEVQVGPEAGMQK	1
		SPFEVSVDK	1
		SPFTVGVAAPLDLSK	1
		SSFLVDCSK	1
		SSTETCYSAIPK	1
		TFEMSDFIVDTR	1
		TYSVEYLPK	1
		VAVTEGCQPSR	1
		VDIQTEDLEDGTCK	1
		VEPAVDTSR	1
		VFGPGIEGK	1
		VKVEPAVDTSR	1
		VLFASQEIPASPFR	1
		VLPTYDASK	1
		VLQSFTVDSSK	1
		VMYTPMAPGNYLISVK	1
		VNQPASFAIR	1
		VQAQGPGLK	1
		VSYFPTVPGVYIVSTK	1
		VTEAEIVPMGK	1
		VVASGPGLEHGK	1
		VVPCLVTPVTGR	1
NCOR1	1	ALDPAAAAYLFQR	1
PEX14	2	GGDGQINEQVEK	1
		IPSWQIPVK	1
CS	6	DILADLIPK	1
		DYIWNTLNSGR	1
		GFSIPECQK	1
		GLVYETSVLDPDEGIR	1
		IVPNVLLEQGK	1
		SMSTEGLMK	1
SEC22B	4	DLQQYQSQAK	1
		GEALSALDSK	1
		IMVANIEEVLQR	1
		NLGSINTELQDVQR	1
PRPF40A	4	EPAFEDITLESER	1
		FTNMLGQPGSTALDLFK	1
		LAFNSLLEK	1
		STTLDAGNIK	1
TACC1	1	SAGLEQPTDPVAR	1
MTX2	1	ANAEYMSPSGK	1
VPS26A	3	EITGIGPSTTTETETIAK	1
		ELALPGELTQSR	1
		LFLAGYDPTPTMR	1
PMPCB	6	IDAVNAETIR	1
		IPIPELEAR	1
		LCTSVTESEVAR	1
		SPAIAAVGPIK	1
		TILGPTENIK	1
		VTCLESGLR	1
ERLIN1	1	EALEPSGENVIQNK	1
GPC4	1	TFAQGLAVAGDVVSK	1
NDUFS3	3	DFPLSGYVELR	1
		SLVDLTAVDVPTR	1
		VVAEPVELAQEFR	1
HSBP1	1	FQTMSDQIIGR	1
EED	1	EVSTAPAGTDMPAAK	1
BANF1	2	AYVVLGQFLVLK	1
		DFVAEPMGEKPVGSLAGIGEVLGK	1
SF3B1	11	ATVNTFGYIAK	1
		GGDSIGETPTPGASK	1
		GSETPGATPGSK	1
		IVDDLKDEAEQYR	1
		LDPFADGGK	1
		QQAADLISR	1
		TEILPPFFK	1
		VLPPPAGYVPIR	1
		VQENCIDLVGR	1
		VVNGAAASQPPSK	1
		WDQTADQTPGATPK	1
CSDE1	1	NITLDDASAPR	1
PRKRA	3	AAEAAINILK	1
		LESFMETGK	1
		VTVGDITCTGEGTSK	1
PGLYRP1	1	AAQGLLACGVAQGALR	1
LYPLA1	2	ASFPQGPIGGANR	1
		TLVNPANVTFK	1
LEFTY1	1	AQYVALLQR	1
SNRNP200	21	ADEVLEILK	1
		CQLPDGSFR	1
		DEPTGEVLSLVGK	1
		DIDAFWLQR	1
		EGSASTEVLR	1
		ESIEEPSAK	1
		FYDDAIVSQK	1
		GNIIISTPEK	1
		GTQVYSPEK	1
		IVALSSSLSNAK	1
		LTAIDILTTCAADIQR	1
		MEADPELSK	1
		MLLQSSEGR	1
		NALLQLTDSQIADVAR	1
		NIEMTQEDVR	1
		SLVQEMVGSFGK	1
		TGNFQVTELGR	1
		TLVEDLFADK	1
		TNVALMCMLR	1
		VFSLSSEFK	1
		YAQAGFEGFK	1
TIPRL	1	IDPNPADSQK	1
TOM1L1	1	YNLPLDIQNR	1
PPM1B	2	NVIEAVYSR	1
		SGSTAVGVMISPK	1
NUP155	1	AAPQSPSVPK	1
RP2	1	APDFLPLLNK	1
SLC25A12	1	YMTPEDFVQR	1
PALM	3	ENAAAPSPVR	1
		TVDGSPMMK	1
		VLSSTTLLPR	1
RNASEH2A	1	LSSPVPAVCR	1
UGT2B17	2	LCEDAVLNK	1
		SVINDPIYK	1
EIF3G	2	LPGELEPVQATQNK	1
		VTNLSEDTR	1
EIF3J	1	VLTPEEQLADK	1
CBR3	4	ILVNACCPGPVK	1
		SDDPMPFDIK	1
		VALVTGANR	1
		VVNISSLQCLR	1
AP1G2	2	GGLPITQLFR	1
		GYALTALMK	1
ZMPSTE24	2	DIQEDSGMEPR	1
		NEEEGNSEEIK	1
IDH1	11	ATDFVVPGPGK	1
		CATITPDEK	1
		DATNDQVTK	1
		DIFQEIYDK	1
		GWPLYLSTK	1
		ISGGSVVEMQGDEMTR	1
		LIDDMVAQAMK	1
		SDYLNTFEFMDK	1
		SEGGFIWACK	1
		TVEAEAAHGTVTR	1
		VEITYTPSDGTQK	1
GATB	1	SQTLIDLNR	1
ATRN	1	SEAACLAAGPGIR	1
RBBP9	1	NMPDPITAR	1
DHRS3	1	ENVLITGGGR	1
ARL6IP5	1	AWDDFFPGSDR	1
BCAS2	2	EMESNWVSLVSK	1
		YELPAPSSGQK	1
DCTN3	2	VQVALGNISSK	1
		WVYGPGGAR	1
DNAJC8	1	ALDVIQAGK	1
SMNDC1	1	SIFASPESVTGK	1
ATP5PD	2	AGLVDDFEK	1
		SWNETLTSR	1
FLOT1	6	AQQVAVQEQEIAR	1
		GEAEAFAIGAR	1
		ITLVSSGSGTMGAAK	1
		SPPVMVAGGR	1
		VFVLPCIQQIQR	1
		VTGEVLDILTR	1
ATP5MG	2	IVNSAQTGSFK	1
		VELVPPTPAEIPR	1
CPD	3	EAAAAGLPGLAR	1
		IVIVPSLNPDGR	1
		SQEGDSISVIGR	1
GLRX3	3	ELPQVSFVK	1
		GELVGGLDIVK	1
		LEAEGVPEVSEK	1
WFS1	2	DAAAPAEPQAQHTR	1
		GDMEIPFEEVLER	1
NEBL	2	NTQVVSDAAYK	1
		TGMLPANYIEFVN	1
SNCG	3	EKEEVAEEAQSGGD	1
		ENVVQSVTSVAEK	1
		TVEEAENIAVTSGVVR	1
SRP72	2	GTQGATAGASSELDASK	1
		TIESANQQTDK	1
JTB	1	TTPECGPTGYVEK	1
DDAH1	5	DENATLDGGDVLFTGR	1
		DYAVSTVPVADGLHLK	1
		GAEILADTFK	1
		TPEEYPESAK	1
		VDGLLTCCSVLINK	1
MTA2	9	ALDCSSSIR	1
		AMSTLVPQGGPVLCR	1
		DISSSLNSLADSNAR	1
		LNPADAPNPVVFVATK	1
		LVEGESDNR	1
		QTFLLQTTK	1
		TLLADQGEIR	1
		TPTQLEGATR	1
		VWDPDNPLTDR	1
STK10	1	LSEEAECPNPSTPSK	1
TPPP	1	VDLVDESGYVSGYK	1
KBTBD11	3	GEAQAAGPSGVSVSR	1
		LPGGPTGLQPFR	1
		VQGVSLTALR	1
TOMM70	3	AAAFEQLQK	1
		NVDLSTFYQNR	1
		YMAEALLLR	1
MYO1D	7	LMYNSSNPVLK	1
		LNQPQPDFTK	1
		SGFILSVPGN	1
		SIPASDLPQVR	1
		SNCVLEAFGNAK	1
		TLFTLEELR	1
		VIVQQPGER	1
SEC24D	2	GGQVYATNTR	1
		STMLPAAVR	1
UFL1	8	AQFAEATQR	1
		AVFVPDIYSR	1
		ELQELSSSIK	1
		EYITPAQISK	1
		LGIPDAVSYIK	1
		QISTLESVSTSK	1
		SVFMSSTTSASGTGR	1
		TQSTWVDSFFR	1
SORBS2	6	ESDVIDVMEK	1
		FFGTFPGNYVK	1
		SFTSSSPSSPSR	1
		SIFEYEPGK	1
		SYSSTLTDMGR	1
		VDLPGSSTTLTK	1
SASH1	1	LEGSIAASGR	1
TMEM63A	2	IALVSEADSESR	1
		TLFITGLPR	1
UBXN7	2	EQITLPEQAK	1
		FELLTNFPR	1
PLPBP	4	APLEVAQEH	1
		IGSTIFGER	1
		ILSLCPEIK	1
		VMVQINTSGEESK	1
ERLIN2	1	VAQVAEITYGQK	1
PRPF6	9	AAQDLCEEALR	1
		AAVELEEPEDAR	1
		AGSVATCQAVMR	1
		DANDPVDDR	1
		ESLEALLQR	1
		LESENDEYER	1
		LSQVSDSVSGQTVVDPK	1
		LTPVPDSFFAK	1
		SEDVWLEAAR	1
FRYL	3	SASLVVPSDIPK	1
		SIFPQQSLR	1
		TDLIELLAR	1
GLS	2	DGPGETDAFGNSEGK	1
		VADYIPQLAK	1
KDM4B	1	VGTPLATEDSGR	1
MTCL2	1	LEEENEELR	1
AP2A2	5	AVDLLYAMCDR	1
		EMAEAFAGEIPK	1
		LEPNLQAQMYR	1
		LLQCYPPPDPAVR	1
		VLVAGDTMDSVK	1
SEC31A	7	CLSSATDPQTK	1
		EQTLSPTITSGLHNIAR	1
		IDASQTEFEK	1
		ISVYSIMGGSTDGLR	1
		NPAVLSAASFDGR	1
		TQPPEDISCIAWNR	1
		TTFEDLIQR	1
CLSTN1	1	GNLAGLTLR	1
TJP3	2	AVGVGPGSSAGSNAR	1
		SSEPVQADESQSPR	1
UBR5	1	VQAMQPAFASK	1
AGFG2	1	GPGPGGGVSGGK	1
SCAF4	2	DLSIGNPIPTVVSGAR	1
		TTPTQPSEQK	1
TSPOAP1	1	NAELAVIAK	1
AKR7A3	1	ALQAAYGASAPSMTSATLR	1
UBE4B	1	LAGGQTSQPTTPLTSPQR	1
ZFPL1	1	LCNIPLASR	1
UBL3	1	ETLPEPNSQGQR	1
NDUFA3	1	ATPYNYPVPVR	1
NDUFB4	2	GLIENPALLR	1
		TLPETLDPAEYNISPETR	1
NDUFB8	1	DMFPGPYPR	1
NDUFA7	1	AVTPAPPIK	1
LETM1	3	AMYLPDTLSPADQLK	1
		STLQTLPEIVAK	1
		VAEVEGEQVDNK	1
STBD1	1	VAVMPAGSQQVSVR	1
ZRANB2	2	AVGPASILK	1
		TGYGGGFNER	1
SNX4	1	QLQPAPLEPLGSPDAGLGAAVGK	1
LUC7L3	4	LALSQNQQSSGAAGPTGK	1
		STTSTIESFAAQEK	1
		VEEAQGMMK	1
		YLQSLLAEVER	1
MBD4	1	GAAPTVTSSER	1
KAT7	1	SQQQPTPVTPK	1
VAPB	3	SLSSSLDDTEVK	1
		TVQSNSPISALAPTGK	1
		VEQVLSLEPQHELK	1
NDUFA10	1	LQSWLYSSR	1
FKBP9	3	DSTFNVFVGK	1
		ISQSGDFLR	1
		TIQVSDFVR	1
PGLS	5	AACCLAGAR	1
		ELPAAVAPAGPASLAR	1
		LVPFDHAESTYGLYR	1
		TVIFVATGEGK	1
		VTLTLPVLNAAR	1
PAPSS2	2	AEAETLPSLSITK	1
		AMDFYDPAR	1
ZBTB7A	1	SVLAACSQYFK	1
IPO7	5	AIFQTIQNR	1
		ETENDDLTNVIQK	1
		QLQDIATLADQR	1
		SDQNLQTALELTR	1
		YGSPGNVSK	1
SLU7	1	LQEELASGK	1
PGM3	3	AFVRPSGTEDVVR	1
		IATLISSFLK	1
		VISTTDAER	1
MOCS3	3	LASALLAEQEPQPER	1
		LVPVSPLPPK	1
		SLQLLSPEER	1
CD2BP2	2	GNLGVYQETR	1
		LSGLADQMVAR	1
TNFRSF6B	1	DSPTTCGPCPPR	1
SVIL	6	AAEFGEPTSEQTGTAAGK	1
		DASSLYPGTETMGLR	1
		FSSSIENSDSPVR	1
		NSPELASESVTQR	1
		SAEGPGLPTGVER	1
		SNEEEETSDSSLEK	1
PAPLN	1	DGQPVSSPR	1
AHSA1	3	EAMGIYISTLK	1
		ETFLTSPEELYR	1
		GIPAPEEER	1
APOM	1	NQEACELSNN	1
PSMG1	1	TSESTGSLPSPFLR	1
SGPL1	1	ASGTVYSGEEK	1
H6PD	5	GSAVVGQYQSYSEQVR	1
		LANDIEATAVR	1
		MSLSLPLINR	1
		QAVAQILPFR	1
		TSFYEEYGVIR	1
SEC24A	1	SMTASLSDAR	1
SEC24B	1	SVSSSLSDAR	1
VNN1	3	EEALALMNR	1
		FGQTPVQER	1
		TTNLNTCGDSAETASTR	1
TDP2	2	SLDLLGLEK	1
		SQEIIPFPSTK	1
SFT2D2	1	VLSGQDTEDR	1
ETHE1	5	EAVLIDPVLETAPR	1
		GGSGAPILLR	1
		LTLSCEEFVK	1
		SLLPGCQSVISR	1
		TDFQQGCAK	1
ACSL3	2	IGYSSPQTLADQSSK	1
		LLLCGGAPLSATTQR	1
POLR1A	1	TALSAVDMTQR	1
ASMTL	3	ETLPPFPTR	1
		VDASACGMER	1
		VVLASASPR	1
CDS2	2	AESAPLPVSADDTPEVLNR	1
		VDGETASDSESR	1
KRT75	1	EYQELMNIK	1
PPP1R3D	1	GPSSAVLPSALGSR	1
SNAP29	3	DLPDGPDAPADR	1
		GAGSAMSTDAYPK	1
		VGVASSEELAR	1
OXSR1	5	DLVIVAANLQK	1
		IVEEPQSNR	1
		LASGVEGSDIPDDGK	1
		SGVLDESTIATILR	1
		TAQALSSGSGSQETK	1
GGPS1	1	GGNPELVALVK	1
HSPA4L	4	AVMEQANLQR	1
		EDISSIEIVGGATR	1
		SFDDPIVQTER	1
		SGGIETIANEYSDR	1
PTBP3	1	TDNLPNQAR	1
LSM8	2	AEPLNSVAH	1
		TVAVITSDGR	1
AP2A1	6	DFLTPPLLSVR	1
		EMGEAFAADIPR	1
		ILVAGDSMDSVK	1
		LEPNAQAQMYR	1
		LLQCYPPPEDAAVK	1
		YGGAPQALTLK	1
WIZ	1	SAGGEPGPEAGR	1
RIGI	1	SLQAFQDYIR	1
STAU1	5	ATVTAMIAR	1
		ELLYGGTSPTAETILK	1
		ILQNEPLPER	1
		LPPLPAVER	1
		NLPVNFEVAR	1
CAVIN2	3	SDGDPVQPAVLQVHQTS	1
		YEGSYALTSEEAER	1
		YQASTSNTVSK	1
BAG2	4	EAATAVEQEK	1
		LLESLDQLELR	1
		NPQQQESLK	1
		TLQQNAESR	1
BAG3	2	GMPETTQPDK	1
		TEAAAAAPQR	1
MLYCD	2	AVPPTPAYELR	1
		EAAVLLQAEDR	1
AIFM1	5	AALSASEGEEVPQDK	1
		ALGTEVIQLFPEK	1
		ELWFSDDPNVTK	1
		ISGLGLTPEQK	1
		SATEQSGTGIR	1
EML2	8	AQFVTCGQDK	1
		AVCCVGFSK	1
		DGTLVSGGGR	1
		LLASADDFGK	1
		LQEVEVPEDFGPVR	1
		QITSADAVR	1
		TVAEGHGDTLYVGTTR	1
		VVLWGSDYSK	1
BPNT1	6	ASAYVFASPGCK	1
		LAQMSICSSLAR	1
		LVASAYSIAQK	1
		LVTDCVAAMNPDAVLR	1
		TCATDLQTK	1
		VIAEGDLGIVEK	1
DDAH2	7	DFAVSTVPVSGPSHLR	1
		GAEIVADTFR	1
		GGGDLPNSQEALQK	1
		GLCGMGGPR	1
		GVPESLASGEGAGAGLPALDLAK	1
		LSDVTLVPVSCSELEK	1
		TVVAGSSDAAQK	1
ABHD16A	2	GTADTLLNR	1
		YQGPVLLIR	1
WDPCP	1	GELALAEVAR	1
TXNDC12	2	EAAASGLPLMVIIHK	1
		ILFLDPSGK	1
EFEMP2	2	CLCPASNPLCR	1
		IGPECVDIDECR	1
SCGB1D2	1	FDAPPEAVAAK	1
TOP3B	1	MSALAAYFV	1
NUDT3	2	EVCEEAGVK	1
		LVGIFENQER	1
AGR2	2	LYAYEPADTALLLDNMK	1
		LYAYEPADTALLLDNMKK	1
BCL10	1	GLDTLVESIR	1
NDUFB10	2	EVEQFTQVAK	1
		YQDLGAYSSAR	1
CLPTM1	1	GPAPQDQAGPGGAPR	1
TOMM40	2	ELFPIQMEGVK	1
		MAIQTQQSK	1
PAK4	1	AGPPASIVPLMR	1
ACTL6A	5	ENMEAISPLK	1
		LIANNTTVER	1
		QGGPTYYIDTNALR	1
		SPLAGDFITMQCR	1
		VDFPTAIGMVVER	1
MOCS2	1	SETISVPQEIK	1
CYB5A	2	EQAGGDATENFEDVGHSTDAR	1
		YYTLEEIQK	1
ADH1C	1	INEGFDLLR	1
LDHA	7	DLADELALVDVIEDK	1
		DQLIYNLLK	1
		DYNVTANSK	1
		LVIITAGAR	1
		QVVESAYEVIK	1
		SADTLWGIQK	1
		VTLTSEEEAR	1
ALDH1A1	5	ANNTFYGLSAGVFTK	1
		GYFVQPTVFSNVTDEMR	1
		QAFQIGSPWR	1
		TIPIDGNFFTYTR	1
		VAFTGSTEVGK	1
GLUD1	2	GFIGPGIDVPAPDMSTGER	1
		NYTDNELEK	1
CYB5R3	2	GPSGLLVYQGK	1
		STPAITLESPDIK	1
GSR	4	ALLTPVAIAAGR	1
		GIYAVGDVCGK	1
		LNAIYQNNLTK	1
		TLSGLEVSMVTAVPGR	1
MT-CO2	2	IFEMGPVFTL	1
		VVLPIEAPIR	1
SOD1	2	GDGPVQGIINFEQK	1
		LACGVIGIAQ	1
CP	9	ALYLQYTDETFR	1
		DIASGLIGPLIICK	1
		DIFTGLIGPMK	1
		EVGPTNADPVCLAK	1
		EYTDASFTNR	1
		GAYPLSIEPIGVR	1
		MFTTAPDQVDKEDEDFQESNK	1
		MYYSAVEPTK	1
		QSEDSTFYLGER	1
OTC	2	GYEPDASVTK	1
		VLSSMADAVLAR	1
F13A1	7	AVPPNNSNAAEDDLPTVELQGVVPR	1
		CGPASVQAIK	1
		FQEGQEEER	1
		GTYIPVPIVSELQSGK	1
		LIASMSSDSLR	1
		STVLTIPEIIIK	1
		VGSAMVNAK	1
PNP	6	FEVGDIMLIR	1
		FPAMSDAYDR	1
		LGADAVGMSTVPEVIVAR	1
		LTQAQIFDYGEIPNFPR	1
		VFGFSLITNK	1
		VIMDYESLEK	1
HPRT1	5	NVLIVEDIIDTGK	1
		SIPMTVDFIR	1
		SYCNDQSTGDIK	1
		TMQTLLSLVR	1
		VIGGDDLSTLTGK	1
GOT2	6	DAGMQLQGYR	1
		FVTVQTISGTGALR	1
		IAAAILNTPDLR	1
		MNLGVGAYR	1
		TCGFDFTGAVEDISK	1
		VGAFTMVCK	1
ABL1	1	GSALGTPAAAEPVTPTSK	1
EGFR	1	IPLENLQIIR	1
PGK1	15	ACANPAAGSVILLENLR	1
		AHSSMVGVNLPQK	1
		ALESPERPFLAILGGAK	1
		DCVGPEVEK	1
		GCITIIGGGDTATCCAK	1
		IQLINNMLDK	1
		ITLPVDFVTADK	1
		ITLPVDFVTADKFDENAK	1
		LTLDKLDVK	1
		NNQITNNQR	1
		TGQATVASGIPAGWMGLDCGPESSK	1
		VLNNMEIGTSLFDEEGAK	1
		VLPGVDALSNI	1
		VNEMIIGGGMAFTFLK	1
		YSLEPVAVELK	1
AK1	4	ATEPVIAFYEK	1
		EVQQGEEFER	1
		IIFVVGGPGSGK	1
		VDDNEETIK	1
F2	9	ELLESYIDGR	1
		ETAASLLQAGYK	1
		ETWTANVGK	1
		GDACEGDSGGPFVMK	1
		NPDSSTTGPWCYTTDPTVR	1
		SEGSSVNLSPPLEQCVPDR	1
		SGIECQLWR	1
		SPQELLCGASLISDR	1
		TATSEYQTFFNPR	1
C1R	2	LPVANPQACENWLR	1
		YTTTMGVNTYK	1
HP	7	HYEGSTVPEK	1
		SPVGVQPILNEHTFCAGMSK	1
		TEGDGVYTLNNEK	1
		VGYVSGWGR	1
		VMPICLPSKDYAEVGR	1
		VTSIQDWVQK	1
		YVMLPVADQDQCIR	1
F9	2	SALVLQYLR	1
		SCEPAVPFPCGR	1
F10	1	MNVAPACLPER	1
PLG	6	ATTVTGTPCQDWAAQEPHR	1
		EAQLPVIENK	1
		FVTWIEGVMR	1
		LSSPAVITDK	1
		QLGAGSIEECAAK	1
		VIPACLPSPNYVVADR	1
F12	1	VVGGLVALR	1
CFB	11	ALFVSEEEK	1
		DAQYAPGYDK	1
		DISEVVTPR	1
		EELLPAQDIK	1
		FLCTGGVSPYADPNTCR	1
		LEDSVTYHCSR	1
		LPPTTTCQQQK	1
		LQDEDLGFL	1
		STGSWSTLK	1
		VSEADSSNADWVTK	1
		YGLVTYATYPK	1
ADA	1	AYGMPPSASAGQNL	1
CA1	4	ADGLAVIGVLMK	1
		GGPFSDSYR	1
		VLDALQAIK	1
		YSSLAEAASK	1
CA2	4	GGPLDGTYR	1
		QSPVDIDTHTAK	1
		SADFTNFDPR	1
		VVDVLDSIK	1
ASS1	2	FELSCYSLAPQIK	1
		NQAPPGLYTK	1
OAS1	1	GSSYPVCVSK	1
SERPINC1	6	ATEDEGSEQKIPEATNR	1
		DDLYVSDAFHK	1
		DIPMNPMCIYR	1
		EVPLNTIIFMGR	1
		LPGIVAEGR	1
		TSDQIHFFFAK	1
SERPINA1	7	DTEEEDFHVDQVTTVK	1
		GTEAAGAMFLEAIPMSIPPEVK	1
		ITPNLAEFAFSLYR	1
		LSITGTYDLK	1
		LSSWVLLMK	1
		SVLGQLGITK	1
		VFSNGADLSGVTEEAPLK	1
SERPINA3	6	ADLSGITGAR	1
		DEELSCTVVELK	1
		EIGELYLPK	1
		ITLLSALVETR	1
		MEEVEAMLLPETLK	1
		NLAVSQVVHK	1
AGT	4	ALQDQLVLVAAK	1
		DPTFIPAPIQAK	1
		SLDFTELDVAAEK	1
		VLSALQAVQGLLVAQGR	1
A2M	15	AIGYLNTGYQR	1
		DMYSFLEDMGLK	1
		FEVQVTVPK	1
		LLLQQVSLPELPGEYSMK	1
		LPPNVVEESAR	1
		NEDSLVFVQTDK	1
		QFSFPLSSEPFQGSYK	1
		QGIPFFGQVR	1
		QTVSWAVTPK	1
		SASNMAIVDVK	1
		TEHPFTVEEFVLPK	1
		VGFYESDVMGR	1
		VSVQLEASPAFLAVPVEK	1
		VTAAPQSVCALR	1
		YDVENCLANK	1
C3	34	ACEPGVDYVYK	1
		ADIGCTPGSGK	1
		AELQCPQPAAR	1
		AGDFLEANYMNLQR	1
		CAEENCFIQK	1
		DFDFVPPVVR	1
		DICEEQVNSLPGSITK	1
		DSCVGSLVVK	1
		EDIPPADLSDQVPDTESETR	1
		ENEGFTVTAEGK	1
		FISLGEACK	1
		GYTQQLAFR	1
		ILLQGTPVAQMTEDAVDAER	1
		IPIEDGSGEVVLSR	1
		ISLPESLKR	1
		LVAYYTLIGASGQR	1
		NTMILEICTR	1
		QELSEAEQATR	1
		QPSSAFAAFVK	1
		QPVPGQQMTLK	1
		SGIPIVTSPYQIHFTK	1
		SGSDEVQVGQQR	1
		SNLDEDIIAEENIVSR	1
		SSLSVPYVIVPLK	1
		TELRPGETLNVNFLLR	1
		TGLQEVEVK	1
		TIYTPGSTVLYR	1
		TVMVNIENPEGIPVK	1
		VFLDCCNYITELR	1
		VLLDGVQNPR	1
		VPVAVQGEDTVQSLTQGDGVAK	1
		VTIKPAPETEK	1
		VYAYYNLEESCTR	1
		YYTYLIMNK	1
C5	5	DINYVNPVIK	1
		DSSVPNTGTAR	1
		ESYSGVTLDPR	1
		LQGTLPVEAR	1
		TDAPDLPEENQAR	1
TIMP1	4	EPGLCTWQSLR	1
		FVYTPAMESVCGYFHR	1
		GFQALGDAADIR	1
		SEEFLIAGK	1
CST3	3	ALDFAVGEYNK	1
		LVGGPMDASVEEEGVR	1
		LVGGPMDASVEEEGVRR	1
KNG1	7	AATGECTATVGK	1
		DIPTNSPELEETLTHTITK	1
		EGDCPVQSGK	1
		ENFLFLTPDCK	1
		IASFSQNCDIYPGK	1
		QVVAGLNFR	1
		TVGSDTFYSFK	1
HRAS	1	SYGIPYIETSAK	1
KRAS	1	VEDAFYTLVR	1
EGF	1	YACNCVVGYIGER	1
TGFB1	1	EAVPEPVLLSR	1
TG	20	AQQQAIALAK	1
		ASCWQPGTR	1
		EAFAEQFLR	1
		FATSCPPTIK	1
		FLAVQSVISGR	1
		FSPDDSAGASALLR	1
		GGADVASIHLLTAR	1
		GGFIPGSLTAR	1
		LAAQSTLSFYQR	1
		LALQFTTNPK	1
		LQQNLFGGK	1
		LRNEDLGLPPLFPPR	1
		QVDQFLGVPYAAPPLAER	1
		SGNPNYPYEFSR	1
		SQAIQVGTSWK	1
		TTISAGAFSQTHCVTDCQR	1
		VIFDANAPVAVR	1
		VSPGYVPACR	1
		VTGGQPACESPR	1
		WESQLPQPR	1
VIP	1	IPFEGANEPDQVSLK	1
JCHAIN	4	CYTAVVPLVYGGETK	1
		FVYHLSDLCK	1
		MVETALTPDACYPD	1
		SSEDPNEDIVER	1
IGKV1-17	1	LIYAASSLQSGVPSR	1
IGKV3-20	1	LLIYGASSR	1
IGLV1-47	1	SGTSASLAISGLR	1
IGLV3-19	1	ITCQGDSLR	1
IGHV1-46	1	DTSTSTVYMELSSLR	1
IGHV3-7	1	GLEWVANIK	1
PIGR	15	ADEGWYWCGVK	1
		AFVNCDENSR	1
		ASVDSGSSEEQGGSSR	1
		CPLLVDSEGWVK	1
		DGSFSVVITGLR	1
		EEFVATTESTTETK	1
		GGCITLISSEGYVSSK	1
		GVAGGSVAVLCPYNR	1
		IIEGEPNLK	1
		ILLNPQDKDGSFSVVITGLR	1
		LVSLTLNLVTR	1
		NADLQVLKPEPELVYEDLR	1
		QSSGENCDVVVNTLGK	1
		TDISMSDFENSR	1
		TVTINCPFK	1
IGKC	1	TVAAPSVFIFPPSDEQLK	1
IGHG3	1	SCDTPPPCPR	1
IGHG4	1	TTPPVLDSDGSFFLYSR	1
IGHM	1	ESDWLGQSMFTCR	1
IGHA1	6	DASGVTFTWTPSSGK	1
		GDTFSCMVGHEALPLAFTQK	1
		NFPPSQDASGDLYTTSSQLTLPATQCLAGK	1
		QEPSQGTTTFAVTSILR	1
		TFTCTAAYPESK	1
		TPLTATLSK	1
HLA-B	1	DGEDQTQDTELVETRPAGDR	1
HLA-DRA	2	EPNVLICFIDK	1
		FASFEAQGALANIAVDK	1
HLA-DRB1	1	YFYNQEESVR	1
HLA-DQB1	2	FDSDVEVYR	1
		VEPTVTISPSR	1
HBD	4	EFTPQMQAAYQK	1
		LLGNVLVCVLAR	1
		TAVNALWGK	1
		VNVDAVGGEALGR	1
COL1A1	23	DGEAGAQGPPGPAGPAGER	1
		EGAPGAEGSPGR	1
		GDAGPAGPK	1
		GEAGPQGPR	1
		GESGPSGPAGPTGAR	1
		GETGPAGPAGPVGPVGAR	1
		GETGPAGPPGAPGAPGAPGPVGPAGK	1
		GFSGLDGAK	1
		GPAGPQGPR	1
		GPPGPMGPPGLAGPPGESGR	1
		GPPGSAGAPGK	1
		GQAGVMGFPGPK	1
		GSAGPPGATGFPGAAGR	1
		GSEGPQGVR	1
		GSPGADGPAGAPGTPGPQGIAGQR	1
		GVPGPPGAVGPAGK	1
		GVQGPPGPAGPR	1
		GVVGLPGQR	1
		NCPGAEVPEGECCPVCPDGSESPTDQETTGVEGPK	1
		QGPSGASGER	1
		SLSQQIENIR	1
		STGGISVPGPMGPSGPR	1
		VLCDDVICDETK	1
COL3A1	5	DGVPGGPGMR	1
		GDAGAPGAPGGK	1
		GPVGPSGPPGK	1
		INTDEIMTSLK	1
		SVNGQIESLISPDGSR	1
CRYAB	3	APSWFDTGLSEMR	1
		EEKPAVTAAPK	1
		VLGDVIEVHGK	1
LMNA	21	AAYEAELGDAR	1
		AQNTWGCGNSLR	1
		ASASGSGAQVGGPISSGSSASSVTVTR	1
		EAALSTALSEK	1
		EDLQELNDR	1
		EGDLIAAQAR	1
		IDSLSAQLSQLQK	1
		ITESEEVVSR	1
		LADALQELR	1
		LEAALGEAK	1
		LQEKEDLQELNDR	1
		LSPSPTSQR	1
		QNGDDPLLTYR	1
		SGAQASSTPLSPTR	1
		SLETENAGLR	1
		SNEDQSMGNWQIK	1
		SVGGSGGGSFGDNLVTR	1
		TALINSTGEEVAMR	1
		TVLCGTCGQPADK	1
		VAVEEVDEEGK	1
		VAVEEVDEEGKFVR	1
SPTA1	2	ETVVESSGPK	1
		VLETAEEIQER	1
APOA1	10	ATEHLSTLSEK	1
		DLATVYVDVLK	1
		DSGRDYVSQFEGSALGK	1
		DYVSQFEGSALGK	1
		LLDNWDSVTSTFSK	1
		LSPLGEEMR	1
		QGLLPVLESFK	1
		VQPYLDDFQK	1
		VSFLSALEEYTK	1
		WQEEMELYR	1
APOE	10	AATVGSLAGQPLQER	1
		GEVQAMLGQSTEELR	1
		LAVYQAGAR	1
		LEEQAQQIR	1
		LGADMEDVCGR	1
		LGPLVEQGR	1
		LQAEAFQAR	1
		QQTEWQSGQR	1
		SELEEQLTPVAEETR	1
		VQAAVGTSAAPVPSDNH	1
APOA2	1	SPELQAEAK	1
APOC1	1	EFGNTLEDK	1
APOC2	1	TYLPAVDEK	1
APOC3	2	DALSSVQESQVAQQAR	1
		GWVTDGFSSLK	1
FGA	13	ALTDMPQMR	1
		EKVTSGSTTTTR	1
		EVDLKDYEDQQK	1
		GDFSSANNR	1
		GGSTSYGTGSETESPR	1
		GLIDEVNQDFTNR	1
		GSESGIFTNTK	1
		HPDEAAFFDTASTGK	1
		MELERPGGNEITR	1
		NPSSAGSWNSGSSGPGSTGNR	1
		QFTSSTSYNR	1
		TVIGPDGHK	1
		VTSGSTTTTR	1
FGB	7	DNDGWLTSDPR	1
		DNENVVNEYSSELEK	1
		EEAPSLRPAPPPISGGGYR	1
		LESDVSAQMEYCR	1
		QDGSVDFGR	1
		QGFGNVATNTDGK	1
		TPCTVSCNIPVVSGK	1
FGG	9	AIQLTYNPDESSKPNMIDAATLK	1
		DNCCILDER	1
		FGSYCPTTCGIADFLSTYQTK	1
		LDGSVDFKK	1
		TSTADYAMFK	1
		VAQLEAQCQEPCK	1
		VELEDWNGR	1
		YEASILTHDSSIR	1
		YLQEIYNSNNQK	1
SLC4A1	6	AAATLMSER	1
		ADFLEQPVLGFVR	1
		ASTPGAAAQIQEVK	1
		IDAYMAQSR	1
		IPPDSEATLVLVGR	1
		LQEAAELEAVELPVPIR	1
CRP	1	GYSIFSYATK	1
APCS	5	AYSLFSYNTQGR	1
		GYVIIKPLVWV	1
		IVLGQEQDSYGGK	1
		QGYFVEAQPK	1
		VGEYSLYIGR	1
C1QA	1	SLGFCDTTNK	1
C1QB	2	GNLCVNLMR	1
		LEQGENVFLQATDK	1
C1QC	2	FQSVFTVTR	1
		TNQVNSGGVLLR	1
C9	4	AIEDYINEFSVR	1
		DGNTLTYYR	1
		LSPIYNLVPVK	1
		VVEESELAR	1
APOH	3	ATVVYQGER	1
		TCPKPDDLPFSTVVPLK	1
		TDASDVKPC	1
LRG1	3	DLLLPQPDLR	1
		GQTLLAVAK	1
		VAAGAFQGLR	1
FN1	30	DLQFVEVTDVK	1
		DSMIWDCTCIGAGR	1
		EESPLLIGQQSTVSDVPR	1
		ESKPLTAQQTTK	1
		FLATTPNSLLVSWQPPR	1
		FTNIGPDTMR	1
		FTQVTPTSLSAQWTPPNVQLTGYR	1
		GDSPASSKPISINYR	1
		GEWTCIAYSQLR	1
		GLAFTDVDVDSIK	1
		HTSVQTTSSGSGPFTDVR	1
		IAWESPQGQVSR	1
		ITYGETGGNSPVQEFTVPGSK	1
		IYLYTLNDNAR	1
		NLQPASEYTVSLVAIK	1
		QYNVGPSVSK	1
		SSPVVIDASTAIDAPSNLR	1
		STTPDITGYR	1
		SYTITGLQPGTDYK	1
		TEIDKPSQMQVTDVQDNSISVK	1
		TFYSCTTEGR	1
		TTPPTTATPIR	1
		TYLGNALVCTCYGGSR	1
		VGDTYERPK	1
		VPGTSTSATLTGLTR	1
		VTIMWTPPESAVTGYR	1
		VTWAPPPSIDLTNFLVR	1
		WLPSSSPVTGYR	1
		YEVSVYALK	1
		YSFCTDHTVLVQTR	1
RBP4	2	DPNGLPPEAQK	1
		FSGTWYAMAK	1
AMBP	5	EYCGVPGDGDEELLR	1
		GECVPGEQEPEPILIPR	1
		GVCEETSGAYEK	1
		TVAACNLPIVR	1
		VVAQGVGIPEDSIFTMADR	1
ORM1	2	SDVVYTDWK	1
		TYMLAFDVNDEK	1
AHSG	2	CDSSPDSAEDVR	1
		TVVQPSVGAAAGPVVPPCPGR	1
TTR	3	AADDTWEPFASGK	1
		YTIAALLSPYSYSTTAVVTNPK	1
		YTIAALLSPYSYSTTAVVTNPKE	1
ALB	24	AAFTECCQAADK	1
		ADDKETCFAEEGK	1
		AEFAEVSKLVTDLTK	1
		AVMDDFAAFVEK	1
		CCAAADPHECYAK	1
		CCTESLVNR	1
		DVCKNYAEAK	1
		DVFLGMFLYEYAR	1
		EFNAETFTFHADICTLSEK	1
		ETCFAEEGK	1
		ETYGEMADCCAK	1
		ETYGEMADCCAKQEPER	1
		HPYFYAPELLFFAK	1
		KVPQVSTPTLVEVSR	1
		LAKTYETTLEK	1
		LDELRDEGK	1
		LVAASQAALGL	1
		LVNEVTEFAK	1
		QNCELFEQLGEYK	1
		QTALVELVK	1
		TCVADESAENCDK	1
		VFDEFKPLVEEPQNLIK	1
		VPQVSTPTLVEVSR	1
		YICENQDSISSK	1
GC	5	CCESASEDCMAK	1
		DVCDPGNTK	1
		EVVSLTEACCAEGADPDCYDTR	1
		LPDATPTELAK	1
		VCSQYAAYGEK	1
CXCL10	1	SLEKLEIIPASQFCPR	1
TFRC	6	LAVDEEENADNNTK	1
		LDSTDFTGTIK	1
		LLNENSYVPR	1
		LTTDFGNAEK	1
		SSGLPNIPVQTISR	1
		YNSQLLSFVR	1
TF	19	ADRDQYELLCLDNTR	1
		APNHAVVTR	1
		CDEWSVNSVGK	1
		CSTSSLLEACTFR	1
		DGAGDVAFVK	1
		DQYELLCLDNTR	1
		DSGFQMNQLR	1
		DYELLCLDGTR	1
		EDPQTFYYAVAVVK	1
		EGTCPEAPTDECKPVK	1
		EGYYGYTGAFR	1
		FDEFFSEGCAPGSK	1
		HQTVPQNTGGK	1
		IECVSAETTEDCIAK	1
		LCMGSGLNLCEPNNK	1
		MYLGYEYVTAIR	1
		SASDLTWDNLK	1
		SVIPSDGPSVACVK	1
		TAGWNIPMGLLYNK	1
LTF	16	CGLVPVLAENYK	1
		CLAENAGDVAFVK	1
		DGAGDVAFIR	1
		DSPIQCIQAIAENR	1
		FDEYFSQSCAPGSDPR	1
		FFSASCVPGADK	1
		FQLFGSPSGQK	1
		GEADAMSLDGGYVYTAGK	1
		GGSFQLNELQGLK	1
		NLLFNDNTECLAR	1
		SDTSLTWNSVK	1
		SNLCALCIGDEQGENK	1
		SVQWCAVSQPEATK	1
		VVWCAVGEQELR	1
		YLGPQYVAGITNLK	1
		YYGYTGAFR	1
HPX	8	DYFMPCPGR	1
		EVGTPHGIILDSVDAAFICPGSSR	1
		GECQAEGVLFFQGDR	1
		GGYTLVSGYPK	1
		LLQDEFPGIPSPLDAAVECHR	1
		NFPSPVDAAFR	1
		VDGALCMEK	1
		YYCFQGNQFLR	1
FTL	2	LGGPEAGLGEYLFER	1
		LNQALLDLHALGSAR	1
FTH1	4	ELGDHVTNLR	1
		HTLGDSDNES	1
		MGAPESGLAEYLFDK	1
		NVNQSLLELHK	1
KLKB1	4	IAYGTQGSSGYSLR	1
		LSMDGSPTR	1
		VLTPDAFVCR	1
		YSPGGTPTAIK	1
MMP1	2	IENYTPDLPR	1
		SQNPVQPIGPQTPK	1
C4BPA	7	EDVYVVGTVLR	1
		FSAICQGDGTWSPR	1
		GYILVGQAK	1
		LMQCLPNPEDVK	1
		LSLEIEQLELQR	1
		TPSCGDICNFPPK	1
		YTCLPGYVR	1
VTN	6	DVWGIEGPIDAAFTR	1
		FEDGVLDPDYPR	1
		GQYCYELDEK	1
		RVDTVDPPYPR	1
		SIAQYWLGCPAPGHL	1
		VDTVDPPYPR	1
CAT	12	ADVLTTGAGNPVGDK	1
		AFYVNVLNEEQR	1
		DLFNAIATGK	1
		DPILFPSFIHSQK	1
		DYPLIPVGK	1
		FNTANDDNVTQVR	1
		FSTVAGESGSADTVR	1
		FSTVAGESGSADTVRDPR	1
		LFAYPDTHR	1
		LNVITVGPR	1
		LSQEDPDYGIR	1
		NLSVEDAAR	1
GBA1	3	NFVDSPIIVDITK	1
		SYFSEEGIGYNIIR	1
		VPMASCDFSIR	1
FUCA1	3	DGLIVPIFQER	1
		DLVGELGTALR	1
		ITMLGIQGDLK	1
ALDOA	10	AAQEEYVKR	1
		ADDGRPFPQVIK	1
		ALANSLACQGK	1
		GILAADESTGSIAK	1
		GILAADESTGSIAKR	1
		GVVPLAGTNGETTTQGLDGLSER	1
		IGEHTPSALAIMENANVLAR	1
		LQSIGTENTEENR	1
		LQSIGTENTEENRR	1
		QLLLTADDR	1
CSTB	1	SQVVAGTNYFIK	1
ANXA1	9	DITSDTSGDFR	1
		GGPGSAVSPYPTFNPSSDVAALHK	1
		GLGTDEDTLIEILASR	1
		GTDVNVFNTILTTR	1
		GVDEATIIDILTK	1
		ILVALCGGN	1
		SEDFGVNEDLADSDAR	1
		SEIDMNDIK	1
		TPAQFDADELR	1
APOB	33	ALVEQGFTVPEIK	1
		AVSMPSFSILGSDVR	1
		DLKVEDIPLAR	1
		DNVFDGLVR	1
		EELCTMFIR	1
[truncated: 11,250 more rows]

## Sheet: Biological-Library DIANN
Gene	Number of Unique Peptides Quantified	Peptide Sequence	Proteotypicity
IGKV3-7	1	EIVMTQSPPTLSLSPGER	1
IGLV4-69	1	FSGSSSGAER	1
IGLV8-61	2	FSGSILGNK	1
		TLIYSTNTR	1
IGLV2-18	1	VSWYQQPPGTAPK	1
IGLV3-16	1	ITCSGEALPK	1
IGLV3-9	1	DSNRPSGIPER	1
IGHV1-45	1	SEDTAMYYCAR	1
IGHV3-49	1	AYGGTTEYAASVK	1
IGHV6-1	1	ITINPDTSK	1
IGLV9-49	1	FSVLGSGLNR	1
IGHV3-72	1	TEDTAVYYCAR	1
IGKV6-21	1	YASQSFSGVPSR	1
IGKV3D-20	1	LLIYDASSR	1
IGHV1-3	1	DTSASTAYMELSSLR	1
IGHV1-18	1	VTMTTDTSTSTAYMELR	1
IGHV4-28	1	VTMSVDTSK	1
IGHV3-35	1	AEDTAVYYCVR	1
IGHV3-38	1	AEGTAVYYCAR	1
IGKV1-8	1	MTQSPSSFSASTGDR	1
IGLV5-39	1	SGINVGTYR	1
IGHV3-64D	1	NTLYLQMSSLR	1
MMP24OS	1	GAPEPAQTQPQPQPQPAAPEGPEQPR	1
RBM47	2	LLGVCCSVDNCR	1
		VPEGVAGAPNEAALLALMER	1
UBA6	8	ACIGDTLCQK	1
		AILSNEATK	1
		LETGQFLTFR	1
		MYSIEPADR	1
		NFALLGVGTSK	1
		QDVIITALDNVEAR	1
		TVFFESLER	1
		YVLGDTAMQK	1
ESYT2	6	AQPPEAGPQGLHDLGR	1
		EPTPSIASDISLPIATQELR	1
		NLIAFSEDGSDPYVR	1
		VDVGQQPLR	1
		VGNQIFQSR	1
		VLVALASEELAK	1
SHTN1	3	QLQLITSLK	1
		SMPVLGSVSSVTK	1
		TVLNSEVLEQR	1
ANO9	1	ADNSVFGLYR	1
BICDL2	3	AVELEGDVEALR	1
		ELSASASSSTPR	1
		SEAGEALSALR	1
ARHGEF37	1	LLEVGSVTYQEEAAR	1
ILVBL	1	TDFRDGSIAV	1
C1orf226	1	SVLQETFPR	1
NDUFAF8	1	LAACGAEAAAYGR	1
SSC5D	3	GLGQLGEAVK	1
		LGPTLGAGTTRSPGSPPTLR	1
		LTQVVEQER	1
SH3PXD2B	6	AAAASVPNADGLK	1
		FEGRPVPDGDAK	1
		GAVVEVIQK	1
		GSLGPWGTGK	1
		SFLPGEGPGR	1
		YTVIYPYTAR	1
NBAS	4	DIVQSAIMK	1
		NQNIVLSAR	1
		STTPEELYQR	1
		VLSGSPYYK	1
TARS3	1	VNTATTTVYR	1
TYW5	1	TLPFDQLVQR	1
VWA8	2	GPALINIQEYPIER	1
		IILDNLQAK	1
SBNO1	2	EFSDFIQAVER	1
		VVSNDDGSISYESR	1
WDR91	1	LSPAQGPPQPQSSAK	1
MBLAC1	1	ADGSVTLVLPQTR	1
MTMR11	2	LEAVSGLSR	1
		VPDTLTFLR	1
VPS37C	2	NLEFQGPLEISR	1
		SLAERNLEFQGPLEISR	1
CNOT1	14	AVQELVHPVVDR	1
		DAIAALGLLQK	1
		EVTAAQVAR	1
		GNAPEGLPQLMEVVR	1
		IAMTTCEQIVR	1
		ILPDSGGVAK	1
		IVEPPENIQEK	1
		LAEVGQYEQVK	1
		LPDPFTPNLK	1
		NLILSAFPR	1
		SNLQVSNEPGNR	1
		SNYEAMIDR	1
		SPVTFLSDLR	1
		VDMLSEINIAPR	1
CCDC88B	5	EALVEALAAAGR	1
		IQAPQLLGGETEGR	1
		LGADGAGSTESLGGPPETELPEGR	1
		LSDGALLLR	1
		VLEPVPLPR	1
C2orf72	1	AAGAAGAAAAAAR	1
FAM83G	1	TVPVADVLAR	1
PGP	3	FIAGTGCLVR	1
		GETAVPGAPEALR	1
		LGFITNNSSK	1
ZNF316	1	GPSSAGPGER	1
TUBAL3	1	SICMLSNTTAIVEAWAR	1
FBLL1	1	TNIIPVLEDAR	1
SMCHD1	4	GLAPIECYNR	1
		GMVFGAPVPK	1
		LQIFSVEGQK	1
		VQLISGPPAK	1
UNC119B	1	LMIENPYETR	1
SOWAHD	1	APTASLAPTSQSLR	1
GLOD5	1	ACDVPIEEGPVPR	1
ARHGAP32	3	LSGVASNIQR	1
		TGLLSVAEGK	1
		YAASGQESLR	1
POM121C	1	TLFASPPAK	1
CLCA1	19	ALGGVNAAR	1
		CSAGITGTNVVK	1
		GCEFVLQSR	1
		IHLTPDFIAGK	1
		ISTSILDLR	1
		KLAEYGPQGR	1
		LAEYGPQGR	1
		LPAAASGGTSICSGLR	1
		MAYLQIPGIAK	1
		NVAILIPETWK	1
		QSGAIIHTVALGPSAAQELEELSK	1
		RLPAAASGGTSICSGLR	1
		TSSGGSFVASDVPNAPIPDLFPPGQITDLK	1
		TTPMTTQPPNPTFSLLQIGQR	1
		TVTLELLDNGAGADATK	1
		VDLKSEISNIAR	1
		WGVFDEYNNDEK	1
		YFTTYDTNGR	1
		YIIRISTSILDLR	1
HIDE1	1	GGQVVQLLQAPTDQR	1
MIF4GD	1	LAQPDSLSK	1
MYO1G	4	LISVEPRPEQPEPDFR	1
		LLYNSTDPTLR	1
		TLVTLEQSR	1
		VIGFSPEEVESVHR	1
PPP1R3G	1	SFSLPADPILQAAK	1
TMEM238	1	APPPPAAGSR	1
MCRIP1	1	SPPSSSEIFTPAHEENVR	1
NACA	1	GGLATPPHK	1
C11orf98	1	VVGAVIDQGLITR	1
C19orf84	1	AGGPGAGPR	1
SMIM22	1	GVDNLALEP	1
ASDURF	1	IVVDELSNLK	1
DNASE2	2	ALINSPEGAVGR	1
		YLDESSGGWR	1
AGPS	2	AASAATAAPTATPAAQESGTIPK	1
		TIISLDTSQMNR	1
KIF2A	3	DLDVITIPSK	1
		FSLIDLAGNER	1
		QQVQVVGLQER	1
DDX39A	1	NCPHVVVGTPGR	1
PDLIM1	7	DFEQPLAISR	1
		GCTDNLTLTVAR	1
		LVGGKDFEQPLAISR	1
		SAMPFTASPASSTTAR	1
		VAASIGNAQK	1
		VTPPEGYEVVTVFPK	1
		VWSPLVTEEGK	1
ACOT7	4	LMDEVAGIVAAR	1
		MIEEAGAIISTR	1
		SLPVPQLVPETEDEK	1
		VLEVPPVVYSR	1
MYO1C	14	DGTIDFTPGSELLITK	1
		DNYPQSVPR	1
		DQAVMISGESGAGK	1
		GDVVLQSDHVIETLTK	1
		IICDLVEEK	1
		LGTDEISPR	1
		LLQSNPVLEAFGNAK	1
		LLSVEGSTLR	1
		NPIMSQCFDR	1
		NPQSYLYLVK	1
		TLFATEDALEVR	1
		VLQALGSEPIQYAVPVVK	1
		VTMESALTAR	1
		YLGLLENLR	1
MYO1F	4	GFGDLAVLK	1
		GPPSTSLGASR	1
		TEFVSLLCK	1
		YAILTPETWPR	1
SNAP23	6	MDNLSSEEIQQR	1
		IEEGLDQINK	1
		ILGLAIESQDAGIK	1
		ITDKADTNR	1
		TITMLDEQK	1
		TITMLDEQKEQLNR	1
HAX1	1	IFGGVLESDAR	1
AIP	3	GELPDFQDGTK	1
		VLELDPALAPVVSR	1
		YYDAIACLK	1
CCL24	1	VVSYQLSSR	1
GTPBP1	3	LVLVSPTSEQYDSLLR	1
		SAMDSPVPASMFAPEPSSPGAAR	1
		VAVVGNVDAGK	1
LGALS9	1	SILLSGTVLPSAQR	1
STXBP3	2	SAEETFQLSR	1
		VLLPVLLNK	1
ARVCF	1	GGGPVATLSR	1
RAB27B	1	LLALGDSGVGK	1
AP3B1	7	ALKDPNQLIR	1
		EASADLSPYVR	1
		LLDSITVPVAR	1
		NVEVIELAK	1
		QFAAATIQTIGR	1
		TVIGSVLLR	1
		VVNVANVGAVPSGQDNIHR	1
APBB1	1	LQATAVGPK	1
LGALS8	2	LNTPMGPGR	1
		SFNVDLLAGK	1
NDUFS8	3	EPATINYPFEK	1
		LCEAICPAQAITIEAEPR	1
		TLLWTELFR	1
PSMD11	8	AQSLLSTDR	1
		DIQENDEEAVQVK	1
		EASIDILHSIVK	1
		EQSILELGSLLAK	1
		LYDNLLEQNLIR	1
		TGQAAELGGLLK	1
		TTANAIYCPPK	1
		YQEALHLGSQLLR	1
PSMD12	6	AIYDTPCIQAESEK	1
		LFTTMELMR	1
		LNSLMSLVNK	1
		MEVDYSATVDQR	1
		TASDMVSTSR	1
		VEFILEQMR	1
PSMD9	6	ANYDVLESQK	1
		GIGMNEPLVDCEGYPR	1
		GLLGCNIIPLQR	1
		KLGQSESQGPPR	1
		LGQSESQGPPR	1
		SDVDLYQVR	1
ATOX1	1	YDIDLPNKK	1
MEN1	2	GLGTGQGAVSGPPR	1
		GQTVNAGVAER	1
CBX4	1	SNVLTGLQDSSTDNR	1
PGRMC1	4	FYGPEGPYGVFAGR	1
		GDQPAASGDSDDDEPPPLPR	1
		RDFTPAELR	1
		RFDGVQDPR	1
SUPT5H	8	DNELIGQTVR	1
		DVTNFTVGGFAPMSPR	1
		FEGDTGLIVR	1
		QAIEGVGNLR	1
		TPAQSGAWDPNNPNTPSR	1
		TPMYGSQTPLQDGSR	1
		TPMYGSQTPMYGSGSR	1
		VVSISSEHLEPITPTK	1
TAF4	2	GAAGAVTQSLSR	1
		TPTATTSGIR	1
DFFA	9	MEVTGDAGVPESGEIR	1
		AAFGEEVDAVDTGISR	1
		ACDILAIDK	1
		ASPPGDLQNPK	1
		EQHGVAASCLEDLR	1
		ETSSDVALASHILTALR	1
		FVALASNEK	1
		LQHTLQQVLDQR	1
		LQQTQSLHSLR	1
HIP1	4	AIGEELLPR	1
		AINTQEVAVK	1
		APPEPADSLTEACK	1
		GVGAGLEAAER	1
CLIC1	10	EEFASTCPDDEEIELAYEQVAK	1
		FLDGNELTLADCNLLPK	1
		GFTIPEAFR	1
		GVTFNVTTVDTK	1
		IGNCPFSQR	1
		KFLDGNELTLADCNLLPK	1
		LAALNPESNTAGLDIFAK	1
		LHIVQVVCK	1
		NSNPALNDNLEK	1
		VLDNYLTSPLPEEVDETSAEDEGVSQR	1
EIF3F	5	AYVSTLMGVPGR	1
		TMGVMFTPLTVK	1
		VIGLSSDLQQVGGASAR	1
		VIGTLLGTVDK	1
		VSADNTVGR	1
WWP2	1	AGVALPFEK	1
PDHX	4	GIQEIADSVK	1
		HSLDASQGTATGPR	1
		QLITVTMSSDSR	1
		VSVNDFIIK	1
MATN2	3	AAIVFTDGR	1
		SLGEENFEVVK	1
		VGLLQYGSTVK	1
QSOX1	5	DFNIPGFPTVR	1
		EVALDLSQHK	1
		LAGAPSEDPQFPK	1
		NGSGAVFPVAGADVQTLR	1
		VLNTEANVVR	1
SLC33A1	1	EALLGDTGTGDFLK	1
WASL	2	GAPPPPPSR	1
		QAPPPPPPSR	1
IPO5	8	ENVNATENCISAVGK	1
		FLFDSVSSQNVGLR	1
		HIVENAVQK	1
		LCGDTSLNNMQR	1
		MLVQCMQDQEHPSIR	1
		STACQMLVCYAK	1
		VAAAESMPLLLECAR	1
		VCDIAAELAR	1
EEF2K	1	ASAVALEVQR	1
SAP18	2	EIGSTMSGR	1
		VKEIGSTMSGR	1
EML1	6	EPVFSAEEGYVK	1
		GDVILIGTTR	1
		ITIATGQVAGTSK	1
		LLSTGDDFGK	1
		QVVSVETTR	1
		VQMQEDDIQLLK	1
IGF2BP3	1	ALQSGPPQSR	1
DNM1L	9	MEALIPVINK	1
		ALQGASQIIAEIR	1
		DTLQSELVGQLYK	1
		GVSPEPIHLK	1
		LGIIGVVNR	1
		LYTDFDEIR	1
		SATLLQLITK	1
		SSVLESLVGR	1
		YIETSELCGGAR	1
RTCA	2	AFVAGVLPFK	1
		QLNPINLTER	1
PIK3C2A	4	GMVELVPASDTLR	1
		SLSVATVTR	1
		TADVTSLFGGEDTSR	1
		VSNLQVSPK	1
LST1	1	LPVPSSEGPDLR	1
PIK3R2	1	IFEEQGQTQEK	1
GOLIM4	3	EADPESEADR	1
		FQSPYEEQLEQQR	1
		LAVQQVEEAQQLR	1
MANBA	2	LPQSTDPLR	1
		YSFDITNVVR	1
AGRN	10	EAACLQQTQIEEAR	1
		FGALCEAETGR	1
		LELGIGPGAATR	1
		SAGDVDTLAFDGR	1
		SELFGETAR	1
		SGCTPCSCDPQGAVR	1
		STVPVNTNR	1
		TPSLDAEGSNCPATK	1
		VLGAPVPAFEGR	1
		VLPEGGAQCECPLGR	1
PLOD2	5	EFIAPVTLK	1
		GGDGINSIGGGQK	1
		IVGPEENLSQAEAR	1
		SEDYVDIVQGNR	1
		VVFAADGILWPDKR	1
MEIS1	1	SANLTDQPSWNR	1
EXOC5	2	IKEAADIIQK	1
		LSDPSDLPR	1
BTN3A3	1	GSSGGGVSCIIR	1
HMGN4	1	DASTLQSQK	1
NDUFA4	1	FYSVNVDYSK	1
PSMD14	3	AVAVVVDPIQSVK	1
		LINANMMVLGHEPR	1
		MTPEQLAIK	1
ZNF593	1	AAGMGSYVPPR	1
BIN1	5	GPPVPPPPK	1
		GVFPENFTER	1
		LDLPPGFMFK	1
		SPSPPDGSPAATPEIR	1
		VNHEPEPAGGATPGATLPK	1
KPNA3	1	SGILPILVK	1
LAD1	9	ATASEQPLAQEPPASGGSPATTK	1
		GLPCTELFVAPVGVASK	1
		LPPVTLQVK	1
		NLSSTTDDEAPR	1
		NSLSPVQATQKPLVSK	1
		QGASDPPTVASR	1
		QVVEAAQAPIQER	1
		RATASEQPLAQEPPASGGSPATTK	1
		SLAPGMALGSGR	1
FAAH	2	EEVYTSSQPLR	1
		GCVYGQEAVR	1
CHL1	2	VEEVKPLEGR	1
		VIAVNEVGR	1
VWA5A	9	ASGGTSEFITGK	1
		DVPRPILLGASAPLK	1
		FVLPAVLNPR	1
		LISYAQLTGR	1
		MLSPEQTVIFR	1
		SGSMQSPMSSQDTSQLR	1
		SSVDPAIFAF	1
		YTQQTMEEALGR	1
		YVQELPLEADGALR	1
SDCBP	1	SLMDHTIPEV	1
PITPNM1	3	EGPGTPPTTLAR	1
		ILDTIDIVR	1
		TNQAYSAFLR	1
NOP56	3	IINDNATYCR	1
		LLLETHLPSK	1
		LSFYETGEIPR	1
DDX3X	3	QSSGASSSSFSSSR	1
		SDYDGIGSR	1
		VGNLGLATSFFNER	1
RNASET2	3	ELDLNSVLLK	1
		VCEDGPVFYPPPK	1
		VCEDGPVFYPPPKK	1
PODXL	1	LASVPGSQTVVVK	1
FCN1	1	VVGLEGSDK	1
CCN1	1	ELGFDASEVELTR	1
PIR	1	MVEPQYQELK	1
NFIB	1	SGVFNVSELVR	1
CES2	7	ADHGDELPFVFR	1
		EEILAINKPFK	1
		FAPPEPPESWSGVR	1
		IQELEEPEER	1
		LGVLGFFSTGDK	1
		MIPGVVDGVFLPR	1
		SFFGGNYIK	1
MAN2B1	5	DLFSTFTITR	1
		LEHQFAVGEDSGR	1
		LPVSEGVFVVK	1
		LQETTLVANQLR	1
		TVDQYFYGIK	1
UBE2C	1	DPAATSVAAAR	1
PDXK	5	AQAGEGVRPSPMQLELR	1
		DIEDPEIVVQATVL	1
		NPAGSVVMER	1
		VLSIQSHVIR	1
		YDYVLTGYTR	1
PLPP3	1	EILSPVDIIDR	1
ARID1A	5	AAAGQESEGPAVGPPQPLGK	1
		AAGPGLGNVAMGPR	1
		ITATMDDMLSTR	1
		SAYPPPAPAYALSSPR	1
		TPQPSSPMDQMGK	1
ISLR	3	ALPGTPVASSQPR	1
		LPGLPEGAFR	1
		MDSNELTFIPR	1
C2CD2L	1	LDSPSRSPSK	1
DPYSL4	2	MDENEFVAVTSTNAAK	1
		QIGENLIVPGGIK	1
TRAFD1	2	LDSQPQETSPELPR	1
		VTPAAANYR	1
COX7A2L	1	GLPDQMLYR	1
GAPDHS	1	VPTPDVSVVDLTCR	1
HSPB6	5	MEIPVPVQPSWLR	1
		APSVALPVAQVPTDPGHFSVLLDVK	1
		ASAPLPGLSAPGR	1
		HFSPEEIAVK	1
		RASAPLPGLSAPGR	1
NDUFAB1	4	LMCPQEIVDYIADK	1
		LMCPQEIVDYIADKK	1
		LSVNSHFMK	1
		LYDKIDPEK	1
UBFD1	2	FPLDSTGSELK	1
		LPTVPLSGMYNK	1
CIT	2	LLMIAGEER	1
		LTQGLQEALDR	1
COPE	4	DSIVAELDREMSR	1
		FGVVLDEIKPSSAPELQAVR	1
		LVLQYAPSA	1
		MFADYLAHESR	1
EIF1AY	1	LEALCFDGVK	1
AP3D1	6	ALDLLYGMVSK	1
		ASCILQLVK	1
		LLESGDLSMSSIK	1
		LYASILQQK	1
		VDSCASMYSR	1
		VPGLPMSDQYVK	1
CCS	1	SAGLFQNPK	1
ENPP3	2	TYLPTFETTI	1
		VQPVSEILQLK	1
ABLIM1	5	FPAAQAPDPSETPK	1
		GVSMPNMLEPK	1
		STSQGSINSPVYSR	1
		TASLPGYGR	1
		TLSPTPSAEGYQDVR	1
DVL2	3	AMAAPESGLEVR	1
		DLGSVPPELTASR	1
		GSTGGAPNLR	1
CHD1	1	SSPSILAVQR	1
GOSR2	2	MDPLFQQTHK	1
		YDVQHLQTALR	1
TOR1A	1	VAEEMTFFPK	1
TOR1B	1	VAEEMTFFPR	1
STX16	2	LTDAFLLLR	1
		SIAAELDELADDR	1
ADAM10	4	AIDTIYQTTDFSGIR	1
		GGTFYVEPAER	1
		LVDADGPLAR	1
		TITLQPGSPCNDFR	1
TP53I11	1	ISQVLGNEIK	1
PTGES	1	AFANPEDALR	1
KMT2D	1	APVAPTPPTLIK	1
ITGB1BP1	1	SVDSSLGGLSR	1
APAF1	3	SVLAAEAVR	1
		SVTDSVMGPK	1
		YVVPVESSLGK	1
IMPA2	2	ALVLTEIGPK	1
		FIAEEAAASGAK	1
CDIPT	2	MIDLSGNPVLR	1
		NMAALDAADR	1
PDCD5	4	AVENYLIQMAR	1
		LSNLALVKPEK	1
		NSILAQVLDQSAR	1
		VSEQGLIEILK	1
PRMT5	5	DLNCVPEIADTLGAVAK	1
		DWNTLIVGK	1
		GPLVNASLR	1
		VPLVAPEDLR	1
		YSQYQQAIYK	1
NHERF1	7	AQEAPGQAEPPAAAEVQGAGNENEPR	1
		EALAEAALESPRPALVR	1
		IVEVNGVCMEGK	1
		LLVVDPETDEQLQK	1
		LVEPGSPAEK	1
		QHGDVVSAIR	1
		SVDPDSPAEASGLR	1
CHEK1	1	ILVENPSAR	1
FPGT	1	CSVAPGSVVEYSR	1
TPP1	4	AYPDVAALSDGYWVVSNR	1
		ILSGRPPLGFLNPR	1
		LFGGNFAHQASVAR	1
		LYQQHGAGLFDVTR	1
TCERG1	5	ATFSEFAAK	1
		EALFNEFVAAAR	1
		GPPPPPTASEPTR	1
		VFFYNPTTR	1
		YLVLDCVPEER	1
NRP1	1	FVTAVGTQGAISK	1
APOL1	2	LNILNNNYK	1
		VNEPSILEMSR	1
POLR3A	8	AEALVLMGTK	1
		ESVLMLASFEK	1
		LAPVYLSNR	1
		LEVNAETVR	1
		NELILTTESIMK	1
		TAETGYMQR	1
		TVISPDPNLR	1
		VVVQGIPEVSR	1
CAPN9	1	NPEFILGGATR	1
PSMA7	2	DIVVLGVEK	1
		ILNPEEIEK	1
SCAMP3	2	AQQEFAAGVFSNPAVR	1
		TAAANAAAGAAENAFR	1
OPLAH	12	AGDFGAAFVER	1
		DIPLNQGCLAPVR	1
		DLLHIGTQAR	1
		DQPLDSSHIASIR	1
		EEALLSVLTER	1
		FMSIAEQMGR	1
		GGPVTVTDANLVLGR	1
		GSILDPSPEAAVVGGNVLTSQR	1
		ILEQEAGMLLPR	1
		ITDPEILESR	1
		LLSEDPANYADAPTEGIR	1
		MGTTVATNALLER	1
BCKDK	1	YLQQELPVR	1
IFIT3	1	SPCQTDVLR	1
GEMIN2	1	SQQLDSNVTMPK	1
TAX1BP3	2	TDKGIYVTR	1
		VSEGGPAEIAGLQIGDK	1
GIPC1	2	DTELAATMVELGK	1
		GPATVEDLPSAFEEK	1
IKBKB	2	GPVSGSPDSMNASR	1
		LGTGGFGNVIR	1
HAT1	1	LLVTDMSDAEQYR	1
CASK	5	ETGQQFAVK	1
		FTSSPGLSTEDLK	1
		MLMLDPAER	1
		NTDEPMGITLK	1
		VGDIIQIISK	1
HGS	4	ALQNAVTTFVNR	1
		LYYEGLQDK	1
		VCEPCYEQLNR	1
		VVQDTYQIMK	1
PPP1R12A	5	ETQTDSISR	1
		ITTGSSSAGTQSSTSNR	1
		LAYVAPTIPR	1
		STQGVTLTDLQEAEK	1
		WIGSETDLEPPVVK	1
GAK	5	AMLQVNPEER	1
		GDLDISYITSR	1
		GPLSCDTVLK	1
		IAVMSFPAEGVESALK	1
		VIQSVANYAK	1
HNRNPDL	3	QLAPLLPSLAPSSAR	1
		SAAAAAATR	1
		VFVGGLSPDTSEEQIK	1
XPO1	5	DLLGLCEQK	1
		DTDSINLYK	1
		MAQEVLTHLK	1
		QMLPLNTNIR	1
		VDTILEFSQNMNTK	1
SYN3	1	QLMADLVVSK	1
SPTBN2	3	DLNAAEALQR	1
		GPAPSAMPQSR	1
		LVSQDNFGLELAAVEAAVR	1
MAST4	1	SPSATGQSSFR	1
SEC16A	11	FATNEAIQR	1
		FGPGGQLIK	1
		GGIGASENLENPPK	1
		LLPSAPQTLPDGPLASPAR	1
		NPSSAAPVQSR	1
		QALQSTPLGSSSK	1
		TMATMGDTLASR	1
		TVPDSEAPPGWDR	1
		VDVINFAQNK	1
		YGPLPGPAVPR	1
		YVDVLNPSGTQR	1
PLXNB2	7	AITEIYLTR	1
		AMTLQEAEAFVGAER	1
		EASPNPEDGIVR	1
		FGAQLQCVTGPQATR	1
		IQPETGPLGGGIR	1
		LVECGSLFK	1
		SQLEGLEESVR	1
TECPR2	1	LESPNSGSCSLPER	1
SETD1A	3	EVPVPTPAPVEVPVPER	1
		LIVDPALDPALR	1
		TLPTAGTVGR	1
SYNJ2	1	TALQVFDPLAK	1
SYNM	32	AALEALLGR	1
		AELQELNAR	1
		ATGPAAPPPR	1
		AVSSQTNVR	1
		DYQDLLQVK	1
		EALGLEQLR	1
		EGLWAEGQAR	1
		EGQGGPGSVSVDVK	1
		EIIFQGPISAAGK	1
		ELQEALGAR	1
		ELYIPSGESEVAGGASHSSGQR	1
		ENLLLEEELR	1
		EREVPISLEVSQDR	1
		ETVQLYEDEVR	1
		EVPISLEVSQDR	1
		EVPVYIGEDSTIAR	1
		GRLDAELGAQQR	1
		GSQTGTSIGGDAR	1
		LCAQEAEALR	1
		LCAQEAEALRR	1
		LDAELGAQQR	1
		LGPTETETSEHIAIR	1
		MREELSALTR	1
		NDQAVGVSFK	1
		SGEFHAEPTVIEK	1
		SPAPGSPDEEGGAEAPAAGIR	1
		SRTQEAGALGVSDR	1
		TFSPTYGLLR	1
		TFVLAGSADSPELGK	1
		TQEAGALGVSDR	1
		VAAGASESTRSNER	1
		YSWQDEIVQGTR	1
PFAS	8	AFSITQGLLK	1
		ATGLGPVDR	1
		ELSDPAGAIIYTSR	1
		FCDNSSAIQGK	1
		FGEPVLAGFAR	1
		IVLVDDRECPVR	1
		SLGLQLPDGQR	1
		VGPGPALMLR	1
MCF2L	1	ELENYTDCPELVGR	1
DCLK1	2	AVSSLATAK	1
		TLSDNVNLPQGVR	1
ANKRD28	2	TPLDLAAFK	1
		TVSFEALPIMR	1
ARHGEF11	5	ASNPLAAEFK	1
		DVVAGLTQR	1
		EISDLMLAR	1
		LSSLSSLGDSAPER	1
		NPIHLAFPGPLFMEGLADSALEDVENLR	1
FYB1	3	FGTPASLTTR	1
		GSPAPLGVR	1
		VTGPNSSSGIQAR	1
SCAMP1	2	AQQEFATGVMSNK	1
		DPSVTQVTR	1
SCAMP2	2	AASSAAQGAFQGN	1
		ELQNTVANLHVR	1
ARPC1B	3	ASSEGGTAAGAGLDSLHK	1
		NSVSQISVLSGGK	1
		TWKPTLVILR	1
ARPC2	7	DNTINLIHTFR	1
		DSIVHQAGMLK	1
		ELQAHGADELLK	1
		IIEETLALK	1
		NCFASVFEK	1
		VTVVFSTVFKDDDDVVIGK	1
		YFQFQEEGK	1
ARPC3	2	LIGNMALLPIR	1
		VFDPQNDKPSK	1
POLR1C	4	FSPVATASYR	1
		ILLAEVPTMAVEK	1
		LGLIPIHADPR	1
		VVLGEFGVR	1
PLSCR1	2	SLDEQCVVGK	1
		VYFAAEDTDCCTR	1
TRIM24	1	SPSASSVGSR	1
PGRMC2	2	FYGPAGPYGIFAGR	1
		GLGAGAGAGEESPATSLPR	1
VILL	6	AGAVALQALK	1
		APDLMQIMEAVLGR	1
		LPEEVPSFQPR	1
		LQDELGGQTVLHR	1
		QAGAEAQGAAEAFQQR	1
		SPATPIVLVK	1
ADAMDEC1	1	VVPSASTTFDNFLR	1
RGL2	3	AGTLEALVR	1
		GVGGGSADLIR	1
		VSCEVEPPGSSDPPAPR	1
PFDN6	2	ETLAQLQQEFQR	1
		LEAQLTENNIVK	1
NKRF	1	GAVEDVISR	1
LAMA5	20	AGALLPAIHEQLR	1
		AHPASNAIDGTER	1
		AIEASNAYSR	1
		ASPDGLCQVSLQQGR	1
		CDIGGALGQSCEPR	1
		DLGAPQAAAEAELAAAQR	1
		GALDQLCGAGGLCR	1
		GPPPELQPQPEGPPR	1
		GQLQLVEGNFR	1
		GYAQMAPVQPR	1
		IAASATCGEEAPAR	1
		LAASLDGAR	1
		LCDELTGQCICPPR	1
		LELEEAATPEGHAVR	1
		LGGQAVGTR	1
		LVGGPVAGGDPNQTIR	1
		MQTFSPAGSK	1
		VGFEGATCDR	1
		VQSQLQAMQENVER	1
		VSSYGGTLR	1
ZNF185	5	GGQGDPAVPAQQPADPSTPER	1
		MSISALGGR	1
		QSSPSGSEQLVR	1
		SEAASGVLR	1
		SQDPPALAR	1
MRPS12	1	GVVLCTFTR	1
VGF	3	LLQQGLAQVEAGR	1
		TLQPPSALR	1
		VNLESPGPER	1
CLIC2	1	FNVTTVDMTR	1
SURF4	1	SMFAGVPTMR	1
MAPK13	4	ASPQAADLLEK	1
		EIVNFSPIAR	1
		SYIQSLPQTPR	1
		VTGVPGTEFVQK	1
SPTLC1	1	LLQEIVDQCMNR	1
SPTLC2	3	DAIVYGQPR	1
		ECVQQLAENTR	1
		VLEEYGAGVCSTR	1
OGT	4	AFLDSLPDVK	1
		DSGNIPEAIASYR	1
		GSVAEAEDCYNTALR	1
		IIFSPVAPK	1
PPM1D	1	MAGLYSLGVSVFSDQGGR	1
PMM2	5	IEFYELDKK	1
		IGVVGGSDFEK	1
		NGMLNVSPIGR	1
		TMGYSVTAPEDTR	1
		TMGYSVTAPEDTRR	1
TM9SF1	1	MAESLYEIR	1
MID1	3	ASVSGPNSPSETR	1
		EIPIEPAPHLR	1
		LIEPIPDSHIR	1
HMGB3	2	NPEVPVNFAEFSK	1
		STNPGISIGDVAK	1
PPM1G	7	ALEDAFLAIDAK	1
		AYTGFSSNSER	1
		GTEAGQVGEPGIPTGEAGPSCSSASDK	1
		NLPPEEQMISALPDIK	1
		NTAELQPESGKR	1
		QLIVANAGDSR	1
		VNGGLNLSR	1
INPPL1	8	AAAEELLAR	1
		ALQDMSSTAPPAPQPSTR	1
		ASGLGEAGMSAWLR	1
		LLLDTLQLSK	1
		SALLPGPLELQPPR	1
		TIPVQAFEVK	1
		TLSEVDYAPAGPAR	1
		VFDQQSSPMVTR	1
EIF3D	5	DMPYQPFSK	1
		GAVIATELK	1
		IFHTVTTTDDPVIR	1
		LGDDIDLIVR	1
		VADWTGATYQDK	1
EIF3H	3	EFTAQNLGK	1
		LFKPPQPPAR	1
		TAQGSLSLK	1
HDAC3	1	VSPTNMQGFTK	1
YY2	1	LPPGGLPGIDLSDPK	1
TMPRSS2	2	TSEVLNAAK	1
		VLTQASNPVVCTQPK	1
IPO8	2	IINFAPSLLR	1
		YGSPGNVTK	1
STX7	5	EFGSLPTTPSEQR	1
		ITQCSVEIQR	1
		QQYTNQLAK	1
		TLNQLGTPQDSPELR	1
		VSGSFPEDSSK	1
TNRC18	3	GLGEPGPSLAAPTPGAR	1
		GVVDLTQEAR	1
		LGPGLVDQER	1
ABCC3	4	MDALCGSGELGSK	1
		GVVAEFDSPANLIAAR	1
		IDGLNVADIGLHDLR	1
		SPQSFFDTTPSGR	1
TLR3	1	NVDSSPSPFQPLR	1
P4HA2	2	LLSLDPSHER	1
		TGVLTVASYR	1
CAPN5	2	GTSTPEYNVK	1
		VFTDVPSNCR	1
YKT6	2	NDSLAGVVIADNEYPSR	1
		VQAELDETK	1
NUP42	1	YSNVIQPSSFSK	1
ARPC5	2	ALAAGGVGSIVR	1
		QGNMTAALQAALK	1
POLR2D	2	AGDVEEDASQLIFPK	1
		ALIPSLEGR	1
TAPBP	3	FVPLPASAK	1
		VSLMPATLAR	1
		WASGLTPAQNCPR	1
CLDN3	2	DFYNPVVPEAQK	1
		STGPGASLGTGYDR	1
DHX15	9	ASTNAMLISAGLPPLK	1
		IIPLYSTLPPQQQQR	1
		LDLGEDYPSGK	1
		SLMSADNVR	1
		SNLGSVVLQLK	1
		TEMQDNTYPEILR	1
		TLATDILMGVLK	1
		VAAMSVAQR	1
		VESLLVTAISK	1
RNMT	1	MQALEPYPANESSK	1
ZZEF1	5	EAAAALLPTPPCESLVSR	1
		GEESVTLEQFR	1
		LDPLEGLDEPTR	1
		LISSTESELQQSYAK	1
		VNEATAVLYAR	1
ASAP2	1	APTASSFTTR	1
PLXNB1	2	GQNLDVVQTPR	1
		GVGGGIPPITTR	1
SIPA1L1	1	ASVVGTDGTPK	1
CYB5B	1	GQEVETSVTYYR	1
PRPF4	5	ALGEPITLFGEGPAER	1
		APDDLVAPVVK	1
		DVNLASCAADGSVK	1
		NILSVVGTDALK	1
		QAEVLAEFER	1
PHGDH	8	AGTGVDNVDLEAATR	1
		GGIVDEGALLR	1
		GTIQVITQGTSLK	1
		ILQDGGLQVVEK	1
		QIPQATASMK	1
		TLGILGLGR	1
		VLISDSLDPCCR	1
		VTADVINAAEK	1
NDUFS4	2	EDAVSFAEK	1
		LDITTLTGVPEEHIK	1
ARHGAP6	1	SVPIQSLSELER	1
SEPTIN4	1	VNIVPILAK	1
DYNC1LI2	4	DAVFIPAGWDNEK	1
		GGPASVPSSSPGTSVK	1
		NILVFGEDGSGK	1
		TGSPGSPGAGGVQSTAK	1
PSMD3	9	AIQLEYSEAR	1
		AVQGFFTSNNATR	1
		EMIDIYSTR	1
		EPQLAFHQR	1
		EQQDLEFAK	1
		FNQVLDQFGEK	1
		ISLADIAQK	1
		LQLDSPEDAEFIVAK	1
		TGVRMISLSYSR	1
PAPSS1	5	MEIPGSLCK	1
		DIVPVDASYEVK	1
		EGQKPPEGFMAPK	1
		NLGFSPEDREENVR	1
		TDAETLPALK	1
ZW10	2	DSVVLSLLK	1
		LSEDIDLLK	1
SPINT1	4	EGFINYLTR	1
		TQGFGGSGIPK	1
		VQPQEPLVLK	1
		YTSGFDELQR	1
SART1	7	EAAGTTAAAGTGGATEQPPR	1
		GLLETTVQK	1
		LASEYLTPEEMVTFK	1
		LEQGGTADGLR	1
		LQAQSLSTVGPR	1
		QLQQLQQLR	1
		TPYIVLSGSGK	1
SPINT2	1	NAADSSVPSAPR	1
DAPK3	1	LQGVECGLR	1
TGFB1I1	4	ASATSATLELDR	1
		DFLQLFAPR	1
		GSLCATCGLPVTGR	1
		LMASLSDFR	1
AP5Z1	1	DANTALPLALR	1
HSPA12A	3	ETAPTSAYSSPAR	1
		LDLTGTSGTAVPAR	1
		TPTTILLTPER	1
CTIF	1	SPDTLAPVASER	1
MTSS1	1	SSNLAQQAPVR	1
PPIP5K2	2	SSVYSPESNVR	1
		TPRTLVEQK	1
MAP3K7	2	MSADMSEIEAR	1
		SIQDLTVTGTEPGQVSSR	1
EEF1E1	1	AIVQQWLEYR	1
HNRNPR	7	DLYEDELVPLFEK	1
		ENILEEFSK	1
		LMMDPLSGQNR	1
		NLATTVTEEILEK	1
		STAYEDYYYHPPPR	1
		TLIEAGLPQK	1
		YGGPPPDSVYSGVQPGIGTEVFVGK	1
PRPF3	5	LFEAVEEGR	1
		LGLMPPPEPK	1
		QCPTENMAR	1
		QLSFISPPTPQPK	1
		VLGTEAVQDPTK	1
TXNL1	3	GYMDLMPFINK	1
		IAPAFSSMSNK	1
		IDQYQGADAVGLEEK	1
TPD52L2	7	MDSAGQDINLNSPNK	1
		GLLSDSMTDVPVDTGVAAR	1
		LGLSTLGELK	1
		TPAVEGLTEAEEEELRAELTK	1
		TQETLSQAGQK	1
		TSAALSTVGSAISR	1
		VEEEIVTLR	1
EMC8	1	ISASLLDSR	1
COCH	1	GVISNSGGPVR	1
ERI3	1	EGLLDPNVK	1
SYNJ1	1	TGMGGATGNK	1
EIF4G3	4	AAIIADSSTFR	1
		FSALQPPAPSGSTPSTPVEFDSR	1
		LDQPANLLR	1
		VGVESTLER	1
PPIH	4	GPFADENFK	1
		IELFADVVPK	1
		IIDGLLVMR	1
		LPVVISQCGEM	1
HTRA2	2	EPLPTLPLGR	1
		SQYNFIADVVEK	1
AKR7A2	4	ALQAAYGASAPSVTSAALR	1
		MDAPASAAAVR	1
		RMDAPASAAAVR	1
		VASVLGTMEMGR	1
PROM1	5	LSLSQLNSNPELR	1
		MNYDSYLAQTGK	1
		QLPPVDAELDNVNNVLR	1
		QTTTVVAGIK	1
		TLLNETPEQIK	1
EPB41L2	14	APHLQLIEGK	1
		EISPGSGPGEIR	1
		EQHPDMSVTR	1
		EVPIVQTETK	1
		FYPPDPSQLTEDITR	1
		GLSPAQADSQFLENAK	1
		GSQPPPAAESQSSLR	1
		IVITGDGDIDHDQALAQAIR	1
		LVSPEQPPK	1
		SLDGAPIGVMDQSLMK	1
		TEMVTISDASQR	1
		VEGDNIYVR	1
		VEMQPTELVSK	1
		VITEEMNGKEISPGSGPGEIR	1
TGOLN2	1	SHPEPQTPK	1
LAMTOR5	2	MEATLEQHLEDTMK	1
		GTLSDEHAGVISVLAQQAAK	1
B4GAT1	2	EPGEFALLR	1
		TALASGGVLDASGDYR	1
WIPF1	5	ALPATPQLPSR	1
		GAPPLPPIPR	1
		GTALGGGSIR	1
		NLSLSSSTPPLPSPGR	1
		SGPLPPPPPVSR	1
ATP8B1	3	GADTVIYER	1
		GYADLISSGR	1
		TQNTITISELGTER	1
SGCE	2	EVENPQNQLR	1
		VPLPINDLK	1
PSTPIP1	1	GFVPGSYLEK	1
XPOT	3	ALAYFEQLK	1
		ASALQDMMR	1
		ILMAIDSELVDR	1
DNPH1	3	FGTVLTEHVAAAELGAR	1
		ILCLFRPQSGR	1
		YFEADPPGQVAASPDPTT	1
TIMM44	1	ILDIDNVDLAMGK	1
CHMP2A	2	ANIQAVSLK	1
		SNNSMAQAMK	1
NCK2	3	GVEGDFLIR	1
		TGYVPSNYVER	1
		VQLVDNVYCIGQR	1
RGS10	1	LQDQIFNLMK	1
ZNF207	1	ETIDAVPNAIPGR	1
NDUFB3	1	IEGTPLETIQK	1
NDUFA2	5	ALENVLSGK	1
		ALENVLSGKA	1
		ANPDLPILIR	1
		GVGAKLGLR	1
		YAFGQETNVPLNNFSADQVTR	1
GET3	3	LEETLPVIR	1
		LLNFPTIVER	1
		LPLLPHEVR	1
BUB3	6	LNQPPEDGISSVK	1
		LYDVPANSMR	1
		QGYVLSSIEGR	1
		TPCNAGTFSQPEK	1
		VAVEYLDPSPEVQK	1
		VYTLSVSGDR	1
SULT1B1	5	FDAIYETEMSK	1
		NYFTVAQNEK	1
		THLPTDLLPK	1
		TSGIEQLEK	1
		VPMLEMTLPGLR	1
ACTN4	16	ACLISLGYDVENDR	1
		AGTQIENIDEDFRDGLK	1
		DDPVTNLNNAFEVAEK	1
		DYETATLSDIK	1
		ETTDTDTADQVIASFK	1
		GISQEQMQEFR	1
		LSGSNPYTTVTPQIINSK	1
		LSNRPAFMPSEGK	1
		MAPYQGPDAVPGALDYK	1
		MLDAEDIVNTARPDEK	1
		NFITAEELR	1
		QFASQANVVGPWIQTK	1
		SFSTALYGESDL	1
		STLPDADRER	1
		VLAGDKNFITAEELR	1
		VLAVNQENEHLMEDYEK	1
GSTZ1	2	DFQALNPMK	1
		QPDTPTELRA	1
BUD23	1	EVRPDTQYTGR	1
GATC	1	LALVDFGSR	1
HTATSF1	1	MQELYGDGK	1
PRKAB2	1	DLSSSPPGPYGQEMYAFRSEER	1
CHP2	1	ETGFSQASLLR	1
AP1G1	4	ADCASGIFLAAEK	1
		AVEYNALFK	1
		TVQTDHNAVQR	1
		VLTTAGSYVR	1
STX6	2	AVNTAQGLFQR	1
		DQMSTSSVQALAER	1
SYNGR2	3	MESGAYGAAK	1
		DVLVGADSVR	1
		FLTQPQVVAR	1
SYNGR3	2	AGAALDPVSFAR	1
		TAPGPATTQAGDAAR	1
SGTA	4	AICIDPAYSK	1
		LGNYAGAVQDCER	1
		MGLALSSLNK	1
		TPPSEEDSAEAER	1
ENSA	2	NLVTGDHIPTPQDLPQR	1
		QLPSAGPDK	1
NARS1	5	EPFPTIYVDSQK	1
		IFDSEEILAGYK	1
		LEDLVCDVVDR	1
		LMTDTINEPILLCR	1
		SPAGSIVHELNPNFQPPK	1
MYO1B	8	LEDLATLIQK	1
		LGNIEFKPESR	1
		QAYEPCLER	1
		SEVPLVDVTK	1
		SLFPEGNPAK	1
		SLPIYSPEK	1
		SLPIYSPEKVEEYR	1
		YNYLSLDSAK	1
SSNA1	1	TIAETEAAYLK	1
NUDT21	2	LFLVQLQEK	1
		YIQQTKPLTLER	1
LANCL1	3	AFPNPYADYNK	1
		IDPHAPNEMLYGR	1
		SLAEGYFDAAGR	1
STRN	3	GLGPLAEAAAAGDGAAAAGAAR	1
		GYTSIFNMETQQR	1
		SVIDTSTIVR	1
RRP9	3	DAVSGLAFR	1
		EIQAPASADIR	1
		LKEDVLEQR	1
SCO2	2	LLGLTGSTK	1
		SAEQISDSVR	1
AKAP8	1	IQFACSVCK	1
IDH3B	3	DMGGYSTTTDFIK	1
		GELASYDMR	1
		NIANPTAMLLSASNMLR	1
NRDC	3	ANLVLLSGANEGK	1
		GSLSNAGDPEIVK	1
		TVFQFDVQR	1
CALU	3	TEREQFVEFR	1
		TFDQLTPEESK	1
		TFDQLTPEESKER	1
ATP9B	2	SAALGQFVMHR	1
		VAAVVESLER	1
AHCYL1	2	EIEIAEQDMSALISLR	1
		TTDVMFGGK	1
CD5L	2	EATLQDCPSGPWGK	1
		LVGGDNLCSGR	1
XPNPEP2	3	DSIQAYSLGDVR	1
		LIFPAATSGR	1
		VLIGNIDLSR	1
KIF1C	1	YPPYTTPPR	1
TYROBP	1	ITETESPYQELQGQR	1
ORC4	1	YPNCPTDVR	1
RAD21	2	CLTPLVPEDLR	1
		LQESVMEASR	1
AKR1B10	1	IVENIQVFDFK	1
TIMM8A	3	AEACFVNCVER	1
		FIDTSQFILNR	1
		SKPVFSESLSD	1
KALRN	2	LNSGKADGNIK	1
		LQGFEGTLTAQGK	1
DHX16	3	EQLEGLLER	1
		LGNEVGYSIR	1
		VAAMSVAAR	1
GMFG	2	ETDNAAIIMK	1
		TTDDLTEAWLQEK	1
PPP1R12B	3	LESGGSNPTTSDSYGDR	1
		LQEAQLELADIK	1
		LYESALTENQK	1
PLIN1	4	AMSLSDALK	1
		ASGAPSAGPEPAPR	1
		VGALTNTLSR	1
		VLHLTPAPAVSSTK	1
PRPSAP2	1	VQVYQEPNR	1
GNG7	1	MSATNNIAQAR	1
SMARCA5	6	FEDSPSYVK	1
		FITDNTVEER	1
		IGKDEMLQMIR	1
		NPELPNAAQAQK	1
		QNLLSVGDYR	1
		SVCLIGDKEQR	1
SPAG9	3	AGPSAQEPGSQTPLK	1
		LFSSSSNTTK	1
		SSTLSQLPGDK	1
SIPA1L3	1	STISASELSLADGR	1
ZFC3H1	1	LDSSPVSSPR	1
AQR	2	VGVPTVDLDAQGR	1
		VIEDGPEPRPNLR	1
MAST3	1	LQEFLTAYAPGAR	1
OPA1	6	EFDLTKEEDLAALR	1
		GVEVDPSLIK	1
		MLAITANTLR	1
		QQLTNTEVR	1
		TSVLEMIAQAR	1
		VVVVGDQSAGK	1
KIF1B	1	IMSTPGGEEAIER	1
KDM1A	2	QATPGVPAQQSPSM	1
		STSQTFIYK	1
TBC1D4	2	ATDPSQVPDVISSIR	1
		ILEDSGFDEQQEFR	1
PPL	3	FTEVYAINR	1
		NLLDEIASR	1
		VVLQQDPQQAR	1
GSDME	1	NPVLQQVLEGR	1
LY75	2	GQTSPGNCVLLDPK	1
		IPENFFEEESR	1
ACSL4	1	VGAPLICCEIK	1
SNX3	3	KQGLEQFINK	1
		VAGHPLAQNER	1
		VVVPPLPGK	1
STX10	2	LPAGDLQER	1
		SPSDLLDASAVSATSR	1
OGA	1	GGLAGEFQR	1
SORBS3	4	DFVYPSSTR	1
		FDFQAQSPK	1
		FGTFPGNYVAPV	1
		QGIFPASYVQVSR	1
SYNCRIP	5	DLFEDELVPLFEK	1
		EQILEEFSK	1
		LDEIYVAGLVAHSDLDER	1
		LMMDPLTGLNR	1
		NLANTVTEEILEK	1
EIF4EBP3	1	DQLPDCYSTTPGGTLYATTPGGTR	1
NEMF	2	AAEPLLTLER	1
		NVAAVQPMK	1
GMDS	2	EMVHADVELMR	1
		FYQASTSELYGK	1
GREM1	1	GSQGAIPPPDK	1
PLOD3	5	LLLLDYPPDR	1
		LVGPEEALSPGEAR	1
		SEDYVELVQR	1
		TLPGGQPPPR	1
		YDCVISSPR	1
SPINK4	1	TKQDIQIMK	1
TLR2	1	ITYISNSDLQR	1
DIAPH1	8	MEPPGGSLGPGR	1
		AMDPAVPNMMIDAAK	1
		DMPLLSCLESLR	1
		EMVSQYLYTSK	1
		FQPLLDGLK	1
		NSETFPTILEEAK	1
		QMPEPEQLK	1
		SAMMYIQELR	1
SELENOF	1	FPQVQAFVR	1
TSPAN1	1	VEGCFNQLLYDIR	1
EXOC3	5	AAIQSQLDGVR	1
		DIQQSLADVSK	1
		DIVVPSLNVAK	1
		EAVATAVQR	1
		NIFSVPEIVR	1
PLIN3	8	DTVATQLSEAVDATR	1
		GLDKLEENLPILQQPTEK	1
		IATSLDGFDVASVQQQR	1
		LEPQIASASEYAHR	1
		LGQMVLSGVDTVLGK	1
		SVVTGGVQSVMGSR	1
		TLTAAAVSGAQPILSK	1
		VSGAQEMVSSAK	1
SLC16A7	1	VSNAQSVTSER	1
RAD1	1	VQEESVTFR	1
PRMT3	2	ALSAEAALAR	1
		TLISEPCGIK	1
KPNA6	3	EPSPPIDEVINTPR	1
		GKNPPPEFAK	1
		VSPCLPVLSR	1
UGDH	12	EQIVVDLSHPGVSEDDQVSR	1
		ESSSIYISK	1
		FSLQDPPNK	1
		IAILGFAFK	1
		ILTTNTWSSELSK	1
		INAWNSPTLPIYEPGLK	1
		IPYAPSGEIPK	1
		IVQNSNGYK	1
		IVTEKSTVPVR	1
		LAANAFLAQR	1
		VLIGGDETPEGQR	1
		VTVVDVNESR	1
CTNND1	12	ALSAIADLLTNEHER	1
		FVGDADLER	1
		GSLASLDSLR	1
		GYELLFQPEVVR	1
		KNGNGGPGPYVGQAGTATLPR	1
		LVENCVCLLR	1
		NCDGVPALVR	1
		QDVYGPQPQVR	1
		SDFQVNLNNASR	1
		SGDLGDMEPLK	1
		SLDNNYSTPNER	1
		VGGSSVDLHR	1
SNX2	9	AVNTQALSGAGILR	1
		ELSANTAAFAK	1
		EPILSSEPSPAVTPVTPTTLIAPR	1
		QFLESSELPR	1
		QQQFENLDQQLR	1
		SAAMLGNSEDHTALSR	1
		SMSAPVIFDR	1
		VGDGMNAYMAYR	1
		YLESLVQTQQQLIK	1
DPM1	2	EGNFDIVSGTR	1
		YSVLLPTYNER	1
USO1	10	IVAFENAFER	1
		LMDLLADSR	1
		LSALLQETK	1
		NDGVLLLQALTR	1
		NQELLQSQLTEK	1
		SQLNSQSVEITK	1
		SSQTSGTNEQSSAIVSAR	1
		VASSTLLDDR	1
		VASSTLLDDRR	1
		VLVSPTNPPGATSSCQK	1
MRPS14	1	ILQDVADEEIAALPR	1
TOM1	5	AGLQSLEASGR	1
		LEDEFDMFALTR	1
		LPNLSSPSAEGPPGPPSGPAPR	1
		SELEMVSGNVR	1
		YEAPQATDGLAGALDAR	1
PFKFB2	4	ENVMEDFLK	1
		FLEEQEITDLK	1
		GADELPYLR	1
		YPGGESYQDLVQR	1
CCDC22	5	DLLLFLAER	1
		ILEIVGNIR	1
		LQLVVENSAQR	1
		LVVPELSSR	1
		QENAGLLGR	1
PRAF2	2	ALDDFVLGSAR	1
		LAAPDPCDPQR	1
DKC1	1	APQVVAEAAK	1
EIF5B	7	DAQEMADSLGVR	1
		GLLLPPPMK	1
		IEPIPGESPK	1
		LLQAQGVEVPSK	1
		QGTPMCVPSK	1
		SPDSDVAATLK	1
		VTVDTGVIPASEEK	1
ZG16	3	DSGTSFNAVPLHPNTVLR	1
		FSHSGNQLDGPITALR	1
		VWSDYVGGR	1
EDF1	2	AIPNNQVLGK	1
		INEKPQVIADYESGR	1
DIAPH2	2	EMVVQYISATAK	1
		LLGAITTAAER	1
DNAJA2	1	NVLCSACSGQGGK	1
BRD4	3	AASVVQPQPLVVVK	1
		SSSDSFEQFR	1
		VQPPTPLLPSVK	1
CUTA	2	QVTESVSDSITVLP	1
		TQSSLVPALTDFVR	1
PFDN1	1	LADIQIEQLNR	1
PPP1R11	1	ATLGPTPTTPPQPPDPSQPPPGPMQH	1
NBN	3	LLPAAGPAGGEPYR	1
		LLTGVEYVVGR	1
		TTTPGPSLSQGVSVDEK	1
NOL3	2	GEAACQELLR	1
		GVLTGPEYEALDALPDAER	1
LILRB5	1	MTLTLSVLICLGLSVGPR	1
ABCB7	1	AGAAFFNEVR	1
SRGAP2	1	ELEGPVYSR	1
NOS1AP	1	VSHPQEPMLTASPR	1
DNAJC6	1	SATSTSASPTLR	1
DENND4B	1	ALGLLSAVER	1
LRP3	2	APEVGPSGPPLPSGLR	1
		LSSAVPALAACSGK	1
WDR1	11	DIAWTEDSKR	1
		DYSGQGVVK	1
		FATASADGQIYIYDGK	1
		LATGSDDNCAAFFEGPPFK	1
		LYSILGTTLK	1
		LYSILGTTLKDEGK	1
		MTVDESGQLISCSMDDTVR	1
		SIQCLTVHK	1
		VFASLPQVER	1
		YAPSGFYIASGDVSGK	1
		YEYQPFAGK	1
SLIT1	2	GLNVAEVQK	1
		SIPPGAFSPYR	1
ATP9A	4	LPTAADLLQIR	1
		SSTIPEQLGR	1
		SVMNTSNPR	1
		VPADMIFLR	1
LDB3	2	ALPGSSQPR	1
		DFNMPLTISR	1
N4BP1	3	GSAEAVVMAR	1
		SAGPSDHIDSSVTGVQR	1
		TGGIIVTNDNFR	1
ROCK2	4	ENLLLSDSPSCR	1
		MPGAPETAPGDGAGASR	1
		MQTQQVNTLK	1
		QIQQLESNNR	1
CLASP2	3	LSSSVSAMR	1
		MVSQSQPGSR	1
		SSGSVASLPQSDR	1
PTCD1	1	VPVNEVVIR	1
COBL	2	FSTGTLSNTADAR	1
		NPLGEGRNQPPTMGMGHVR	1
CPNE3	5	FGVYDIDNK	1
		NCLNPQFSK	1
		SPLGEVAIR	1
		SSPVEFECINEK	1
		VVLFEMEAR	1
ATG13	1	LATCTPSDR	1
ICOSLG	1	ALMSPAGMLR	1
HIP1R	6	AINTQEAPVK	1
		ALVDNEQLR	1
		EADLLAAQSLVR	1
		GAATQQEFYAK	1
		LLDEQFAVLR	1
		LPEGPPNFLR	1
RNF40	9	ALQGSLGGVEK	1
		AVEAAQLAEDLK	1
		EGPSLGPPPVASALSR	1
		EIQPCLAESR	1
		EMAPVPGTTTTTTSVK	1
		GDSEPLSEAAQAHTR	1
		SQVDAQLLTVQK	1
		TTTTLIEPIR	1
		VQLEHVQTR	1
PHF2	2	TFPSAEDVVAR	1
		VLNVTNLEFSDTR	1
ZC3H11A	3	AAVAVVPLVSEDK	1
		TVLPTVPESPEEEVK	1
		TVVLPPIVASR	1
CLUH	5	AVGSISSTAFDIR	1
		FNPDIFSPGVR	1
		SVEGLQEGSVLR	1
		VTAQSIIPGILER	1
		VVEEPYTVR	1
TSC22D2	1	TEDVSSEIFDVSR	1
DNAJC13	11	ADLVPYLLK	1
		ADTVGLACEAINR	1
		AQTAELFAK	1
		ATVPLQSNVIEAAPDMK	1
		ENGLEVLQEAFSR	1
		IAAHLADFTPR	1
		MQELALSEGALPR	1
		TELLTEALR	1
		VEMALEALR	1
		VLALTETCLVER	1
		VYNEVPTFQLEVPK	1
PPP6R2	6	AASAMDAVSR	1
		DAPGAGAPPAPGK	1
		EAPPLPTVAR	1
		LLSPACPAPK	1
		LVSCVEPAGLR	1
		VGTEGLVDSFSQGLER	1
CNOT3	2	APEPLSSLK	1
		MLDNDSILVDAIR	1
ATP2C2	1	LQAMSGEEVDSVEKGELADR	1
XYLB	1	VAAFPGDVEVR	1
COQ9	1	LVQLGQAEK	1
GGCT	5	AIEPNDYTGK	1
		LDFGNSQGK	1
		NPSAAFFCVAR	1
		SYLMTNYESAPPSPQYK	1
		VSEEIEDIIK	1
NDUFS7	2	LDDLVNWAR	1
		VYDQMPEPR	1
RTN2	1	VVSAATQLR	1
NDUFS2	3	LDELEELLTNNR	1
		LVMELSGEMVR	1
		TYLQALPYFDR	1
CDH16	1	LGALALSPK	1
ZPR1	8	AISGLEQDQPAR	1
		FTTLEGLLK	1
		GALTTVEGLITR	1
		IPELDFEIPAFSQK	1
		MDQIIEGNMK	1
		NPFTLGDSSNPGQTER	1
		SGGAVEPLGTR	1
		TEGYEAGLAPQR	1
NIPSNAP2	2	SGPNIYELR	1
		YEGGYPALTEVMNK	1
CILP	3	ASVTFLDPR	1
		KGSAVFHEIK	1
		LFNLDVPESR	1
PDCD6	3	LSDQFHDILIR	1
		QALSGFGYR	1
		YITDWQNVFR	1
TBCA	4	ILENEKDLEEAEEYK	1
		LEAAYLDLQR	1
		QAEILQESR	1
		RLEAAYLDLQR	1
ATP6V1G1	1	MTILQTYFR	1
VPS4B	2	IYIPLPEPHAR	1
		LLEPVVSMSDMLR	1
MPDU1	1	LLVPILLPEK	1
BCAS1	5	ANFTSQETQGAGK	1
		DPTLLPPETGGAGGEAPSKPK	1
		SGPTSLPLGK	1
		TGDQAADSSLGSVK	1
		TITPPEPEPTGAPQK	1
MACROH2A1	4	AASADSTTEGTPADGFTVLSTK	1
		LEAIITPPPAK	1
		QTAAQLILK	1
		SIAFPSIGSGR	1
SH3BGRL	8	DIAANEENR	1
		DIAANEENRK	1
		ENNAVYAFLGLTAPPGSK	1
		GDYDAFFEAR	1
		KQQDVLGFLEANK	1
		QQDVLGFLEANK	1
		VYIASSSGSTAIK	1
		VYIASSSGSTAIKK	1
FLNB	48	AAGSGELGVTMK	1
		ADIEMPFDPSK	1
		AEVSIQNNK	1
		AGLAPLEVR	1
		AGPGTLSVTIEGPSK	1
		APSVATVGSICDLNLK	1
		CLATGPGIASTVK	1
		EAFTNKPNVFTVVTR	1
		EVGEHLVSIK	1
		FADEHVPGSPFTVK	1
		FVPQEMGVHTVSVK	1
		GAGIGGLGITVEGPSESK	1
		GEAGVPAEFSIWTR	1
		GIEPTGNMVK	1
		IAGPGLGSGVR	1
		IFAQDGEGQR	1
		IFFAGDTIPK	1
		IGNLQTDLSDGLR	1
		IKLNGLENR	1
		IPEINSSDMSAHVTSPSGR	1
		LDVTILSPSR	1
		LPNNHIGISFIPR	1
		LTVMSLQESGLK	1
		LVSPGSANETSSILVESVTR	1
		MDGTYACSYTPVK	1
		SGCIVNNLAEFTVDPK	1
		SPFEVQVGPEAGMQK	1
		SPFEVSVDK	1
		SPFTVGVAAPLDLSK	1
		SSFLVDCSK	1
		SSTETCYSAIPK	1
		TATPEIVDNKDGTVTVR	1
		TFEMSDFIVDTR	1
		TGEEVGFVVDAK	1
		TYSVEYLPK	1
		VAVTEGCQPSR	1
		VEVGKDQEFTVDTR	1
		VFGPGIEGK	1
		VLFASQEIPASPFR	1
		VLPTYDASK	1
		VLQSFTVDSSK	1
		VNQPASFAIR	1
		VPVKDVVDPSK	1
		VQAQGPGLK	1
		VTEAEIVPMGK	1
		VVASGPGLEHGK	1
		VVPCLVTPVTGR	1
		YGGELVPHFPAR	1
NCOR1	5	EQPLGLPYPATR	1
		GTAGAIQEGSITR	1
		ISVESIPSLR	1
		LQTYQPEVVK	1
		QDSLLLLSQR	1
NDUFS6	2	TGTCGYCGLQFR	1
		VIACDGGGGALGHPK	1
CS	8	ALGFPLERPK	1
		DILADLIPK	1
		DYIWNTLNSGR	1
		GFSIPECQK	1
		GLVYETSVLDPDEGIR	1
		IVPNVLLEQGK	1
		SMSTEGLMK	1
		VVPGYGHAVLR	1
SPAG7	2	EVSDFIQDSGQIK	1
		SIEEAMNEIR	1
SEC22B	7	ANNLSSLSK	1
		DLQQYQSQAK	1
		GEALSALDSK	1
		IMVANIEEVLQR	1
		KLNEQSPTR	1
		NLGSINTELQDVQR	1
		VADGLPLAASMQEDEQSGR	1
PRPF40A	5	FTNMLGQPGSTALDLFK	1
		LAFNSLLEK	1
		QETVADFTPK	1
		STTLDAGNIK	1
		TPAEQLLSK	1
TACC1	3	KCAQDYLAR	1
		SAGLEQPTDPVAR	1
		SFQQLTMEK	1
NME6	1	GSFGLTDTR	1
LRCH4	4	GTVEEQRPPELSPGAGDR	1
		SSSQSGSGPSSPDSVLRPR	1
		SYDLSDITQADLSR	1
		YLSTEAGQR	1
MTX2	1	ANAEYMSPSGK	1
VPS26A	3	EITGIGPSTTTETETIAK	1
		ELALPGELTQSR	1
		LFLAGYDPTPTMR	1
NDUFB1	1	ELQPSEEVTWK	1
PMPCB	7	IDAVNAETIR	1
		IPIPELEAR	1
		LCTSVTESEVAR	1
		SFGGGMNLSSK	1
		SPAIAAVGPIK	1
		TILGPTENIK	1
		VTCLESGLR	1
MED24	1	SQAEQCGTLIR	1
PSIP1	2	DIFPYSENK	1
		FSSQQAATK	1
GPC4	1	TFAQGLAVAGDVVSK	1
NDUFS3	4	DFPLSGYVELR	1
		ILTDYGFEGHPFR	1
		SLVDLTAVDVPTR	1
		VVAEPVELAQEFR	1
SRSF10	1	YLRPPNTSLFVR	1
CLN5	1	LAEFGAEFK	1
HSBP1	1	FQTMSDQIIGR	1
ECI2	1	ATEMLIFGK	1
EED	1	EVSTAPAGTDMPAAK	1
BANF1	1	DFVAEPMGEKPVGSLAGIGEVLGK	1
SF3B1	16	ATVNTFGYIAK	1
		GGDSIGETPTPGASK	1
		IVDDLKDEAEQYR	1
		IWDPTPSHTPAGAATPGR	1
		LDPFADGGK	1
		LSSWDQAETPGHTPSLR	1
		QLVDTTVELANK	1
		QQAADLISR	1
		TEILPPFFK	1
		VGAAEIISR	1
		VLPPPAGYVPIR	1
		VPELNVQNGVLK	1
		VQENCIDLVGR	1
		VVNGAAASQPPSK	1
		VVNGAAASQPPSKR	1
		WDQTADQTPGATPK	1
CSDE1	4	EMGVIAAMR	1
		GPDNSMGFGAER	1
		NITLDDASAPR	1
		NQNDPLPGR	1
SKAP2	1	GEFAIDGYSVR	1
PRKRA	4	AAEAAINILK	1
		LESFMETGK	1
		NIPVYECER	1
		VTVGDITCTGEGTSK	1
MTRF1	1	IPEVGLSSR	1
MYCBP2	5	ITTYPPGSVR	1
		LSQSEENISGMTSFR	1
		QAMSPSVAECAR	1
		SEAITTPGVR	1
		VLPEVTPSR	1
PGLYRP1	1	AAQGLLACGVAQGALR	1
LYPLA1	3	ALIDQEVKNGIPSNR	1
		ASFPQGPIGGANR	1
		TLVNPANVTFK	1
ERAL1	2	DPNTQSVGNPQR	1
		VVLLGAPNAGK	1
SNRNP200	23	ANSNLVLQADR	1
		DEPTGEVLSLVGK	1
		DIDAFWLQR	1
		EIDLLLGQTDDTR	1
		FYDDAIVSQK	1
		GNIIISTPEK	1
		GPVLEALVAR	1
		GTQVYSPEK	1
		IVALSSSLSNAK	1
		LYDLNHNEIGELIR	1
		MLLQSSEGR	1
		MEADPELSK	1
		NALLQLTDSQIADVAR	1
		NIEMTQEDVR	1
		NSAFESLYQDK	1
		SLVQEMVGSFGK	1
		TGNFQVTELGR	1
		TLVEDLFADK	1
		TNVALMCMLR	1
		VFSLSSEFK	1
		VVLLTGETSTDLK	1
		YAQAGFEGFK	1
		YISSQIERPIR	1
TIPRL	3	GTLLGESLK	1
		IDPNPADSQK	1
		VVPTTDHIDTEK	1
TOM1L1	1	QETAQISSNPPTSVPTAPALSSVIAPK	1
RPS6KA4	6	GSPAPANPGR	1
		IGPVAQDLLQR	1
		LEPVYSPPGSPPPGDPR	1
		LGAGPQGAQEVR	1
		TPDVLESSGPAVR	1
		VSVENFELLK	1
PPM1B	2	NVIEAVYSR	1
		SGSTAVGVMISPK	1
NUP155	2	AAPQSPSVPK	1
		NSQFAGGPLGNPNTTAK	1
RP2	4	APDFLPLLNK	1
		CTLACQQFR	1
		EKAPDFLPLLNK	1
		KLIDEMVGK	1
CRTAP	1	DELMPLESAYR	1
SLC25A12	5	DVEVTKEEFAQSAIR	1
		EEFAQSAIR	1
		SPSVAVVQPK	1
		YLGLYNDPNSNPK	1
		YMTPEDFVQR	1
SLC22A3	1	GPSAAALAER	1
PALM	4	MEVLAAETTSQQER	1
		ENAAAPSPVR	1
		TVDGSPMMK	1
		VLSSTTLLPR	1
RNASEH2A	1	LSSPVPAVCR	1
CDC123	1	VQEAINSLGGSVFPK	1
UGT2B17	1	SVINDPIYK	1
CAPN15	1	TAGLVATEPAR	1
POP7	1	GAVEAELDPVEYTLR	1
RPP40	1	DLQCPVLQSSELEGTPEVSCR	1
EIF3G	6	ELAEQLGLSTGEK	1
		ETDLQELFRPFGSISR	1
		GIPLATGDTSPEPELLPGAPLPPPK	1
		LPGELEPVQATQNK	1
		RGESMQPNR	1
		VTNLSEDTR	1
EIF3J	4	GVVPGGGLK	1
		ITNSLTVLCSEK	1
		VLTPEEQLADK	1
		VLTPEEQLADKLR	1
CBR3	3	ILVNACCPGPVK	1
		VALVTGANR	1
		VVNISSLQCLR	1
AP1G2	2	ADCASGILLAAER	1
		AVEYDTLFR	1
PPP1R37	1	SPPGSPSTPTEQR	1
IDH1	9	ATDFVVPGPGK	1
		DIFQEIYDK	1
		ISGGSVVEMQGDEMTR	1
		LIDDMVAQAMK	1
		LVSGWVKPIIIGR	1
		SDYLNTFEFMDK	1
		SEGGFIWACK	1
		TVEAEAAHGTVTR	1
		VEITYTPSDGTQK	1
GATB	1	ETLPELPSVTR	1
CYP7B1	1	LSSYSTTIR	1
ATRN	2	LTGSSGFVTDGPGNYK	1
		SEAACLAAGPGIR	1
RBBP9	2	IPGFQCLAK	1
		NMPDPITAR	1
STAM2	1	LVNEAPVYSVYSK	1
ALDH1L1	5	ANATEFGLASGVFTR	1
		DLGEAALNEYLR	1
		EESFGPVMIISR	1
		IGFTGSTEVGK	1
		TDVAAPFGGFK	1
CCNK	1	DPQQPAQQQQPAQQPK	1
DHRS3	1	ENVLITGGGR	1
ARL6IP5	2	MDVNIAPLR	1
		AWDDFFPGSDR	1
DYSF	2	EELYCPPITVK	1
		TDALLGEFR	1
BCAS2	2	QPIELLSMK	1
		YELPAPSSGQK	1
DCTN3	2	VQVALGNISSK	1
		YLDPEYIDR	1
DNAJC8	1	ALDVIQAGK	1
SMNDC1	1	SIFASPESVTGK	1
RAD17	1	ASLTELDSPR	1
ATP5PD	1	SWNETLTSR	1
FLOT1	8	AAYDIEVNTR	1
		AQQVAVQEQEIAR	1
		GEAEAFAIGAR	1
		ITLVSSGSGTMGAAK	1
		SPPVMVAGGR	1
		VFVLPCIQQIQR	1
		VSAQYLSEIEMAK	1
		VTGEVLDILTR	1
TRIO	2	IQSSESFPK	1
		STGVLDTSR	1
ATP5MG	2	IVNSAQTGSFK	1
		VELVPPTPAEIPR	1
CPD	7	AIIENLIQK	1
		EAAAAGLPGLAR	1
		GFVLDATDGR	1
		IVIVPSLNPDGR	1
		NFGTDPEVTDLVHNTR	1
		NPAVTQLVDR	1
		SQEGDSISVIGR	1
GLRX3	3	ELPQVSFVK	1
		GELVGGLDIVK	1
		LDGAHAPELTK	1
RSL1D1	1	ALPASETPK	1
WFS1	5	MDSNTAPLGPSCPQPPPAPQPQAR	1
		APGPQAGPGPGVR	1
		DAAAPAEPQAQHTR	1
		GDMEIPFEEVLER	1
		LNATASLEQER	1
CLPX	4	AAAAADLANR	1
		SNILLLGPTGSGK	1
		TLVQILTEPR	1
		YLGFGTPSNLGKGR	1
SCGN	1	LEEYTGTMMK	1
NEBL	4	EVGAGTAVK	1
		GMQVSMDIPDILR	1
		NTQVVSDAAYK	1
		TGMLPANYIEFVN	1
SNCG	2	EGVMYVGAK	1
		TVEEAENIAVTSGVVR	1
PDE5A	2	EQMPLTPPR	1
		FNAEVDQITGYK	1
SRP72	2	ELYGQVLYR	1
		YDECLAVYR	1
JTB	1	TTPECGPTGYVEK	1
DDAH1	7	ALPESLGQHALR	1
		DENATLDGGDVLFTGR	1
		DYAVSTVPVADGLHLK	1
		GAEILADTFK	1
		LQLNIVEMK	1
		TPEEYPESAK	1
		VDGLLTCCSVLINK	1
URI1	1	AFVDVVNGEYVPR	1
B3GAT3	1	ISQLQAELR	1
MTA2	10	ALDCSSSIR	1
		AMSTLVPQGGPVLCR	1
		DISSSLNSLADSNAR	1
		DITLFHAMDTLQR	1
		LNPADAPNPVVFVATK	1
		QFESLPATHIR	1
		QTFLLQTTK	1
		TLLADQGEIR	1
		TPTQLEGATR	1
		VWDPDNPLTDR	1
STK10	6	AGNVLMTLEGDIR	1
		GLTEPQIQVVCR	1
		LANGSLEPPAQAAPGPSK	1
		QVAEQGGDLSPAANR	1
		SDPPTLLTPSK	1
		SLQTTSPPVVAPGNENGLAVPVPLR	1
TPPP	3	AISSPTVSR	1
		APIISGVTK	1
		VDLVDESGYVSGYK	1
KBTBD11	4	GEAQAAGPSGVSVSR	1
		LLLADAYSGR	1
		LPGGPTGLQPFR	1
		LQLPGAAQR	1
ATP10B	2	LQEGVPDTIATLR	1
		QSYNLTQQR	1
TOMM70	5	AAAFEQLQK	1
		EIDAEGKYMAEALLLR	1
		LRPESALAQAQK	1
		NVDLSTFYQNR	1
		YMAEALLLR	1
MYO1D	8	LMYNSSNPVLK	1
		LNQPQPDFTK	1
		NSMIALVDNLASK	1
		SGFILSVPGN	1
		SIPASDLPQVR	1
		SNCVLEAFGNAK	1
		TLFTLEELR	1
		VIVQQPGER	1
SEC24D	4	GGQVYATNTR	1
		GQIPPLVTTDCMIQDQGNASPR	1
		ILFQPQTNVYDSLAK	1
		STMLPAAVR	1
NFASC	1	EVAGDTIIFR	1
UFL1	9	AQFAEATQR	1
		AVFVPDIYSR	1
		ELQELSSSIK	1
		EYITPAQISK	1
		FINDCTELFR	1
		LGIPDAVSYIK	1
		QISTLESVSTSK	1
		QNGYLEFDALSR	1
		SVFMSSTTSASGTGR	1
SORBS2	7	FFGTFPGNYVK	1
		KSEPAVGPPR	1
		SFTSSSPSSPSR	1
		SIFEYEPGK	1
		SYSSTLTDMGR	1
		VDLPGSSTTLTK	1
		VGIFPISYVEK	1
TMEM63A	1	TLFITGLPR	1
FARP2	1	QSISFPEGLR	1
UBXN7	4	ADGVVEGIDVNGPKAQLMLR	1
		EQITLPEQAK	1
		FELLTNFPR	1
		RPLTEPPVR	1
SUN1	1	VDQMEGGAAGPSASVR	1
PLPBP	3	IGSTIFGER	1
		ILSLCPEIK	1
		VMVQINTSGEESK	1
ERLIN2	2	VAQVAEITYGQK	1
		VTKPNIPEAIR	1
PRPF6	4	AGSVATCQAVMR	1
		ESLEALLQR	1
		LSQVSDSVSGQTVVDPK	1
		LTPVPDSFFAK	1
PCF11	1	FAGLDTNQR	1
FRYL	8	AIANVFQNR	1
		IEVVMAEPLEK	1
		SASLVVPSDIPK	1
		SIFPQQSLR	1
		SNTLDIMDGR	1
		TDLIELLAR	1
		TLMEFITSR	1
		TYGGDTGSPEISFTK	1
ENDOD1	3	ILEVVNQIQDEER	1
		QALNTDYLDSDYQR	1
		SSSPLSSTR	1
GLCE	2	APPVVGGFNSNVGSK	1
		DIYYGIGPR	1
GLS	3	FALSAMDMEQR	1
		GSTHPQPGVSPPAAPAAPGPK	1
		VADYIPQLAK	1
KDM4B	1	VGTPLATEDSGR	1
MTCL2	1	GLQEQLSQER	1
AP2A2	7	AVDLLYAMCDR	1
		EMAEAFAGEIPK	1
		LEPNLQAQMYR	1
		LLQCYPPPDPAVR	1
		TSPDLVPMGDWTSR	1
		TTQIGCLLR	1
		VLVAGDTMDSVK	1
SEC31A	8	CLSSATDPQTK	1
		ISVYSIMGGSTDGLR	1
		NPAVLSAASFDGR	1
		QVQHILASASPSGR	1
		TGPQNGWNDPPALNR	1
		TQPPEDISCIAWNR	1
		TTFEDLIQR	1
		VDGANVALK	1
CLSTN1	1	IPDGVVSVSPK	1
HEXIM1	2	AENLQLLTENELHR	1
		LGAPAAGGEEEWGQQQR	1
TJP3	2	AEQLASLEAAQR	1
		ISAHQGAQVDSR	1
YIF1A	1	TAALGPDSMGGPVPR	1
UBR5	9	AASTAPSSTSTPAASSAGLIYIDPSNLR	1
		ATFLGLTNEK	1
		AYPAAITILETAQK	1
		CLMEVTVDR	1
		DLLIQQTMR	1
		LAGNTLGSR	1
		NVAIFTAGQESPIILR	1
		VQAMQPAFASK	1
		VTFKDEPGEGSGVAR	1
AGFG2	1	GPGPGGGVSGGK	1
SCAF4	3	AAFPPPEQK	1
		DLSIGNPIPTVVSGAR	1
		TVEPPISQVGNVDTASELEK	1
MFN2	4	IEVLDSLQSK	1
		MFEFQNFER	1
		QVSTAMAEEIR	1
		SQIDMLVPR	1
AKR7A3	1	ALQAAYGASAPSMTSATLR	1
UBE4B	3	ITLPNDETR	1
		LAGGQTSQPTTPLTSPQR	1
		LPSGTIMDR	1
ZFPL1	1	LCNIPLASR	1
ELP1	3	AFEDTLQLMER	1
		DIQGPGNPQCFSLR	1
		LGAVGGSGFK	1
NDUFB4	2	GLIENPALLR	1
		TLPETLDPAEYNISPETR	1
NDUFB8	1	DMFPGPYPR	1
NDUFA7	1	AVTPAPPIK	1
VAMP5	1	SDQLLDMSSTFNK	1
RTN3	1	TQIDHYVGIAR	1
LETM1	3	AMYLPDTLSPADQLK	1
		DTAPVLEGLK	1
		STLQTLPEIVAK	1
STBD1	2	APVLNLNQGMDNGR	1
		VAVMPAGSQQVSVR	1
ZRANB2	2	AVGPASILK	1
		TGYGGGFNER	1
SNX4	3	IGLENFLLR	1
		QLQPAPLEPLGSPDAGLGAAVGK	1
		VLEEQINEGEQQLK	1
LUC7L3	5	LALSQNQQSSGAAGPTGK	1
		LVEQLKEER	1
		STTSTIESFAAQEK	1
		VEEAQGMMK	1
		YLQSLLAEVER	1
APOL3	2	ALANGIEEVHR	1
		HLHEGAKSASAEELR	1
SBF1	4	GSGEGQGQILQR	1
		SSGLGTDVGSR	1
		TISLGAGDR	1
		TTVPSGPPMTAILER	1
KAT7	4	ASEDLEKLR	1
		LSQSSQDSSPVR	1
		NLQSFGTEEPAYSTR	1
		SQQQPTPVTPK	1
VAPB	3	SLSSSLDDTEVKK	1
		TVQSNSPISALAPTGK	1
		VEQVLSLEPQHELK	1
SNAPIN	2	AMLDSGIYPPGSPGK	1
		EQIDNLATELCR	1
MPZL1	1	SESVVYADIR	1
NDUFA10	3	CEVLQYSAR	1
		TFLPEMSEK	1
		VITVDGNICTGK	1
FKBP9	4	DSTFNVFVGK	1
		ISQSGDFLR	1
		IVVPPHLGYGEEGR	1
		TIQVSDFVR	1
CELF2	1	VMFSPFGQIEECR	1
PGLS	7	AACCLAGAR	1
		ELPAAVAPAGPASLAR	1
		IVAPISDSPKPPPQR	1
		LCWFLDEAAAR	1
		LVPFDHAESTYGLYR	1
		TVIFVATGEGK	1
		VTLTLPVLNAAR	1
PAPSS2	3	AEAETLPSLSITK	1
		AMDFYDPAR	1
		DIHELFVPENK	1
SMC2	3	ALEEELAGLK	1
		FVDGVSTVAR	1
		SLEDALAEAQR	1
ATG7	2	LPEMAFSPDCPK	1
		MVNLSECMDPK	1
TACC2	12	AGMPVSADAAK	1
		ANAEIAQVR	1
		DSSTPYQEIAAVPSAGR	1
		EVVDAGLVGLER	1
		GAASEWPLLSSEK	1
		GPEGSLLPSPPPSQER	1
		LDNTPASPPR	1
		NLPGAGVGK	1
		QQPVPAPQQK	1
		SAQPPGNSQNIK	1
		STCAPSPQR	1
		VSPPAADVLK	1
ZBTB7A	1	SVLAACSQYFK	1
LYPLA2	1	DLAILQCHGELDPMVPVR	1
IPO7	5	MDPNTIIEALR	1
		AIFQTIQNR	1
		QLQDIATLADQR	1
		SDQNLQTALELTR	1
		YGSPGNVSK	1
TNFAIP8	1	EVATDVFNSK	1
MAP3K6	2	AALGVLGPEVEK	1
		ERFSGPQLR	1
PGM3	4	AFVRPSGTEDVVR	1
		IATLISSFLK	1
		VDCANGIGALK	1
		VISTTDAER	1
GCNT3	2	SNAEMVQALK	1
		YDISDMTSIAR	1
MOCS3	3	LASALLAEQEPQPER	1
		SLQLLSPEER	1
		YDVVADCSDNVPTR	1
CD2BP2	4	GNLGVYQETR	1
		GPGQPSSPQR	1
[truncated: 18,326 more rows]

## Sheet: Biological-Library Spectronaut
Gene	Number of Unique Peptides Quantified	Peptide Sequence	Proteotypicity
A1BG	5	ATWSGAVLAGR	1
		CEGPIPDVTFELLR	1
		CLAPLEGAR	1
		LELHVDGPPPRPQLR	1
		SGLSTGWTQLSK	1
A2M	18	AIGYLNTGYQR	1
		DMYSFLEDMGLK	1
		DTVIKPLLVEPEGLEK	1
		FEVQVTVPK	1
		IAQWQSFQLEGGLK	1
		LLIYAVLPTGDVIGDSAK	1
		LLLQQVSLPELPGEYSMK	1
		LPPNVVEESAR	1
		LVHVEEPHTETVR	1
		NEDSLVFVQTDK	1
		QFSFPLSSEPFQGSYK	1
		QGIPFFGQVR	1
		QTVSWAVTPK	1
		SASNMAIVDVK	1
		TEHPFTVEEFVLPK	1
		VGFYESDVMGR	1
		VTAAPQSVCALR	1
		YDVENCLANK	1
A2ML1	1	SSSNMAIVEVK	1
AAAS	2	CSLGLFPPPPPR	1
		LLSASPVDAAIR	1
AACS	1	VVVIPYVSSR	1
AAK1	3	LTDPIPTTETSIAPR	1
		SATTTPSGSPR	1
		VQTTPPPAVQGQK	1
AAMDC	6	EYNALVAQGVR	1
		GVQTLVIGR	1
		TSPEIASLSWGQMK	1
		VGGVFHSTC	1
		VLQTEQAVK	1
		VPSSTVEYLK	1
AAMP	1	AVVGYEDGTIR	1
AAR2	1	AAVQMDPELAK	1
AARS1	12	AEEIANEMIEAAK	1
		AVFDETYPDPVR	1
		AVYTQDCPLAAAK	1
		DIINEEEVQFLK	1
		EADGILKPLPK	1
		GAMSTQQIK	1
		GLEVTDDSPK	1
		ITCLCQVPQNAANR	1
		IVAVTGAEAQK	1
		MDSTLTASEIR	1
		SIDTGMGLER	1
		VGAEDADGIDMAYR	1
AARS2	3	GVQLDSAGLER	1
		LDVTTQTPLTPEQLR	1
		LLAVTGEQAQQAR	1
AARSD1	1	GTINDISVLR	1
ABAT	1	GNYLVDVDGNR	1
ABCB1	7	AGAVAEEVLAAIR	1
		IATEAIENFR	1
		LANDAAQVK	1
		STTVQLMQR	1
		TVIAFGGQK	1
		TVVSLTQEQK	1
		VVSQEEIVR	1
ABCB7	1	AGAAFFNEVR	1
ABCC1	3	DGAFAEFLR	1
		GVNLSGGQK	1
		TPSGNLVNR	1
ABCC3	1	SPQSFFDTTPSGR	1
ABCD3	2	IANPDQLLTQDVEK	1
		ITELMQVLK	1
ABCD4	1	VNAEPAAFYR	1
ABCE1	5	GSELQNYFTK	1
		GTVGSILDR	1
		NTVANSPQTLLAGMNK	1
		NVEDLSGGELQR	1
		VIVFDGVPSK	1
ABCF1	4	AVSEEQQPALK	1
		GFNLPYQDAR	1
		MEETPTEYLQR	1
		VVFAELACR	1
ABCF2	2	LVDEEPQLTK	1
		SMLLSAIGK	1
ABCF3	3	ELTAQIAAGR	1
		LLLGDLAPVR	1
		VEGGFDQYR	1
ABHD10	2	ALAIEEFCK	1
		FNQLPVELK	1
ABHD11	2	AINIADELPR	1
		LADEQLSSVIQDMAVR	1
ABHD12	1	LTGPAAAEPR	1
ABHD14B	5	AVAIDLPGLGHSK	1
		EALPGSGQAR	1
		FSSETWQNLGTLHR	1
		FSVLLLHGIR	1
		INAANYASVK	1
ABHD16A	2	GTADTLLNR	1
		YQGPVLLIR	1
ABI1	2	ALIESYQNLTR	1
		TLEPVKPPTVPNDYMTSPAR	1
ABI3	2	EIGTLATVQR	1
		VVTLYPYTSQK	1
ABI3BP	4	FTEAIVDAEPK	1
		IYLSDSLTGK	1
		TGQQLTSDQLPIK	1
		VSEPVSAGR	1
ABLIM1	6	FPAAQAPDPSETPK	1
		GVSMPNMLEPK	1
		STSQGSINSPVYSR	1
		TASLPGYGR	1
		TLSPTPSAEGYQDVR	1
		VLTGEYISK	1
ABR	4	ELPEPLLTDR	1
		GIEEVGIYR	1
		GQIQLDPQTVETK	1
		ISGVATDIQALK	1
ABRACL	1	MNVDHEVNLLVEEIHR	1
ABRAXAS2	6	MPSSGFAAEGR	1
		NTQQQMSYR	1
		QMPSESLDPAFSPR	1
		VSSVPNTSQSYAK	1
		VVESCQAEVNK	1
		YPGSGADLPPPQR	1
ACAA1	1	GNPGNITSR	1
ACAA2	5	DFTATDLSEFAAK	1
		DMDLVEVNEAFAPQYLAVER	1
		ETPALTINR	1
		TNVNGGAIALGHPLGGSGSR	1
		TPFGAYGGLLK	1
ACACA	3	GSVLEPEGTVEIK	1
		LGGIPVGVVAVETR	1
		LGTPELSTAER	1
ACAD10	1	GGLVISPESLSPPVR	1
ACAD8	3	AVIFEDCAVPVANR	1
		ELFPVDVMR	1
		GISCIVVEK	1
ACAD9	3	LSEFGLIQEK	1
		VSTVMDTVGR	1
		YAPENLDEQIK	1
ACADM	5	AAWEVDSGR	1
		ENVLIGDGAGFK	1
		IYQIYEGTSQIQR	1
		NTYYASIAK	1
		TGEYPVPLIR	1
ACADS	5	DSILGEPGMGFK	1
		IAMQTLDMGR	1
		ITEIYEGTSEIQR	1
		LADMALALESAR	1
		MAFGAPLTK	1
ACADSB	2	ASSTCPLTFENVK	1
		ATYLPQLTTEK	1
ACADVL	8	ALEQFATVVEAK	1
		ASNTAEVFFDGVR	1
		GGVVTSNPLGF	1
		GIVNEQFLLQR	1
		IFEGTNDILR	1
		TPVTDPATGAVK	1
		TSAVPSPCGK	1
		VPSENVLGEVGSGFK	1
ACAN	1	YQCTEGFVQR	1
ACAP2	3	AVQTSIATAYR	1
		DFSQMASNNPEK	1
		LMCELGNDVINR	1
ACAT1	6	DGLTDVYNK	1
		EAYMGNVLQGGEGQAPTR	1
		EVVIVSATR	1
		FGNEVIPVTVTVK	1
		GSTPYGGVK	1
		NEQDAYAINSYTR	1
ACAT2	2	EIVPVLVSTR	1
		MNAGSDPVVIVSAAR	1
ACBD3	4	EDAMVEFVK	1
		EWAALGNMSK	1
		IQQDADSVITVGR	1
		QQEVVVAGSSLPTSSK	1
ACE	5	AALPAQELEEYNK	1
		SMYETPSLEQDLER	1
		TLGSANLPLAK	1
		YQGLCPPVPR	1
		YVELINQAAR	1
ACIN1	10	ASLVALPEQTASEEETPPPLLTK	1
		GALMLENLQK	1
		GLLVDRPSETK	1
		SAQPLPLKIEELALAK	1
		SQEQEVLER	1
		STLADYSAQK	1
		TSTSSSSVQAR	1
		VPEESVLPLVQK	1
		VTLGDTLTR	1
		WGASTATTQK	1
ACLY	15	AFDSGIIPMEFVNK	1
		AIVWGMQTR	1
		AKPAMPQDSVPSPR	1
		DGVYVLDLAAK	1
		FGGALDAAAK	1
		FICTTSAIQNR	1
		GGPNYQEGLR	1
		IGNTGGMLDNILASK	1
		LGQEATVGK	1
		SAYDSTMETMNYAQIR	1
		SGGMSNELNNIISR	1
		TIAIIAEGIPEALTR	1
		TTDGVYEGVAIGGDR	1
		VDATADYICK	1
		VTPDTDWAR	1
ACO1	9	AVDAGLNVMPYIK	1
		AVLAESYER	1
		DFESCLGAK	1
		NIEVPFKPAR	1
		QYVIPGMFK	1
		SNPFAHLAEPLDPVQPGK	1
		SNPFAHLAEPLDPVQPGKK	1
		TVVPCCSGPK	1
		YQQAGLPLIVLAGK	1
ACO2	11	DINQEVYNFLATAGAK	1
		DSSGQHVDVSPTSQR	1
		FNPETDYLTGTDGK	1
		IVYGHLDDPASQEIER	1
		LNRPLTLSEK	1
		LTGSLSGWSSPK	1
		NAVTQEFGPVPDTAR	1
		NTIVTSYNR	1
		QGLLPLTFADPADYNK	1
		SQFTITPGSEQIR	1
		WVVIGDENYGEGSSR	1
ACOT11	1	GELSVGQLLK	1
ACOT13	2	ITLVSAAPGK	1
		TLAFTSVDLTNK	1
ACOT7	4	LMDEVAGIVAAR	1
		MIEEAGAIISTR	1
		SLPVPQLVPETEDEK	1
		VLEVPPVVYSR	1
ACOT9	2	IAFSSTSLLK	1
		YLTVQNTVR	1
ACP1	4	IELLGSYDPQK	1
		LVTDQNISENWR	1
		SPIAEAVFR	1
		VDSAATSGYEIGNPPDYR	1
ACP3	1	SPIDTFPTDPIK	1
ACSF2	4	IMNMEAGTLAK	1
		LNTPGELCIR	1
		TVGQCLETTAQR	1
		VQEVQVVGVK	1
ACSF3	1	LPGSVGTPLPGVQVR	1
ACSL1	4	IGFFQGDIR	1
		LLLEGVENK	1
		NIVSDCSAFVK	1
		VLQPTVFPVVPR	1
ACSL3	5	IGYSSPQTLADQSSK	1
		LLLCGGAPLSATTQR	1
		NTPLCDSFVFR	1
		VGAPLVCCEIK	1
		VSEMSSFQR	1
ACSL4	2	IGYSSPLTLSDQSSK	1
		VGAPLICCEIK	1
ACSL5	5	ADIAMVICDTPQK	1
		ALVLIGNVEK	1
		GSFEELCQNQVVR	1
		IVQAVVYSCGAR	1
		VIVTGAAPMSTSVMTFFR	1
ACSM3	1	GNFYITGDR	1
ACSS1	2	EPAAFWGPLAR	1
		TEGGYYQITGR	1
ACSS2	5	AELGMGDSTSQSPPIK	1
		AELGMGDSTSQSPPIKR	1
		FYTAPTAIR	1
		GATTNICYNVLDR	1
		TPCPGPFLR	1
ACTA1	2	DLYANNVMSGGTTMYPGIADR	1
		KDLYANNVMSGGTTMYPGIADR	1
ACTB	3	DDDIAALVVDNGSGMCK	1
		DDDIAALVVDNGSGMCKAGFAGDDAPR	1
		MDDDIAALVVDNGSGMCKAGFAGDDAPR	1
ACTBL2	5	DLYANTVLSGGSTMYPGIADR	1
		EIITLAPSTMK	1
		GYNFTTTAER	1
		KDLYANTVLSGGSTMYPGIADR	1
		VAPDEHPILLTEAPLNPK	1
ACTG1	2	EEEIAALVIDNGSGMCK	1
		EEEIAALVIDNGSGMCKAGFAGDDAPR	1
ACTG2	1	CEEETTALVCDNGSGLCKAGFAGDDAPR	1
ACTL6A	5	ENMEAISPLK	1
		LIANNTTVER	1
		QGGPTYYIDTNALR	1
		SPLAGDFITMQCR	1
		VDFPTAIGMVVER	1
ACTMAP	2	ESNLQLTDFSPSR	1
		VYVVPVGGVR	1
ACTN1	14	ATLPDADKER	1
		DDPLTNLNTAFDVAEK	1
		DYETATLSEIK	1
		ETADTDTADQVMASFK	1
		GISQEQMNEFR	1
		ILAGDKNYITMDELR	1
		IMSIVDPNR	1
		KDDPLTNLNTAFDVAEK	1
		LAILGIHNEVSK	1
		LSNRPAFMPSEGR	1
		MLDAEDIVGTARPDEK	1
		NYITMDELR	1
		VLAVNQENEQLMEDYEK	1
		VPENTMHAMQQK	1
ACTN2	1	GITQEQMNEFR	1
ACTN4	16	ACLISLGYDVENDR	1
		AGTQIENIDEDFRDGLK	1
		DDPVTNLNNAFEVAEK	1
		DYETATLSDIK	1
		ETTDTDTADQVIASFK	1
		GISQEQMQEFR	1
		LSGSNPYTTVTPQIINSK	1
		MAPYQGPDAVPGALDYK	1
		MLDAEDIVNTARPDEK	1
		NFITAEELR	1
		QFASQANVVGPWIQTK	1
		QLEAIDQLHLEYAK	1
		SFSTALYGESDL	1
		STLPDADRER	1
		VLAGDKNFITAEELR	1
		VLAVNQENEHLMEDYEK	1
ACTR1A	1	DQLQTFSEEHPVLLTEAPLNPR	1
ACTR2	4	DLMVGDEASELR	1
		GYAFNHSADFETVR	1
		ILLTEPPMNPTK	1
		LCYVGYNIEQEQK	1
ACTR3	7	AEPEDHYFLLTEPPLNTPENR	1
		DREVGIPPEQSLETAK	1
		DYEEIGPSICR	1
		LPACVVDCGTGYTK	1
		NIVLSGGSTMFR	1
		QYTGINAISK	1
		YSYVCPDLVK	1
ACY1	6	AVGVPALGFSPMNR	1
		DMNLTLEPEIMPAATDNR	1
		EGSVTSVNLTK	1
		GPEEEHPSVTLFR	1
		LLPALASVPALPSDS	1
		VVNSILAFR	1
ACYP1	2	GTVQGQLQGPISK	1
		LDYSDFQIVK	1
ACYP2	1	SVDYEVFGR	1
ADA	3	AQTPAFDKPK	1
		IAYEFVEMK	1
		TVHAGEVGSAEVVK	1
ADAM10	2	AIDTIYQTTDFSGIR	1
		TITLQPGSPCNDFR	1
ADAM17	1	LQPAPVIPSAPAAPK	1
ADAM9	2	FAVPTYAAK	1
		FLPGGTLCR	1
ADAMDEC1	1	VVPSASTTFDNFLR	1
ADAR	5	AMTILLEEAK	1
		DINAVLIDMER	1
		MGFTEVTPVTGASLR	1
		TAESQTPTPSATSFFSGK	1
		YLNTNPVGGLLEYAR	1
ADAT3	1	VFYGAPSPDGALGTR	1
ADD1	9	AAVVTSPPPTTAPHK	1
		GSEENLDEAR	1
		INLQGDIVDR	1
		QDFNMMEQK	1
		SLVQGELVTASK	1
		SPGSPVGEGTGSPPK	1
		TAGPQSQVLCGVVMDR	1
		TLASAGGPDNLVLLNPEK	1
		TSTSAVPNLFVPLNTNPK	1
ADD3	8	GLSFSEATASNLVK	1
		IEDPNQFVPLNTNPNEVLEK	1
		IEEVLSPEGSPSK	1
		INENDPEYIR	1
		SSDASQGVITTPPPPSMPHK	1
		VGEIEFEGLMR	1
		VNIIGEVVDQGSTNLK	1
		VTQILQSPAFR	1
ADGRE5	1	LVDELMEAPGDVEALAPPVR	1
ADGRG1	1	LPISSGSTSSSR	1
ADH1C	1	INEGFDLLR	1
ADH5	5	AGDTVIPLYIPQCGECK	1
		GLMPDGTSR	1
		IDPLAPLDK	1
		IIGVDINKDK	1
		VDEFVTHNLSFDEINK	1
ADIRF	1	TANQASDTFSGIGK	1
ADISSP	1	LLSVVPVPEGYSVK	1
ADK	1	AAAEEEPKPK	1
ADNP	4	IGSLASGNVR	1
		SLPSQQMVNR	1
		SPSLSQSQASR	1
		SYGLGSEQR	1
ADO	4	AEDLNIAPR	1
		ALPPEQQFEPPLQPR	1
		DAASGPEAPMQPGFPENLSK	1
		DNMASLIQR	1
ADPGK	1	VAGTQACATETIDTSR	1
ADPRS	3	AAAAMAAAAGGGAGAAR	1
		IGELLDQASVTR	1
		TEALYYTDDTAMAR	1
ADRM1	2	SQSAAVTPSSTTSSTR	1
		TTSGALFPSLVPGSR	1
ADSL	5	AFIITGQTYTR	1
		NALDLLLPK	1
		QQIGSSAMPYK	1
		SNLENIDFK	1
		VLSQQAASVVK	1
ADSS2	5	ELPVNAQNYVR	1
		FIEDELQIPVK	1
		TLPGWNTDISNAR	1
		VGIGAFPTEQDNEIGELLQTR	1
		VVDLLAQDADIVCR	1
AEBP1	6	LVSYPYDMAR	1
		TPTQEQLLAAAMAAAR	1
		VPNNNLPIPER	1
		VTAHAEGYTPSAK	1
		VVNEECPTITR	1
		YLSPDATVSTEVR	1
AFAP1	1	SQAAPGSSPCR	1
AFDN	13	ELQPQQQPR	1
		FVDPSQDHALAK	1
		ISETTMLQSGMK	1
		LFSQGQDVSNK	1
		LTELENELNTK	1
		SLVGLSQER	1
		SQDADSPGSSGAPENLTFK	1
		SSDGRPDSGGTLR	1
		SSPNVANQPPSPGGK	1
		SVTPASTLTK	1
		TISNPEVVMK	1
		TPAAIPATPVAVSQPIR	1
		TQVLSPDSLFTAK	1
AFG2A	1	GSSLGAGNVADR	1
AFG2B	1	GVLLAGPPGVGK	1
AFG3L2	5	GAILTGPPGTGK	1
		GMGGLFSVGETTAK	1
		ITTGAQDDLR	1
		VGQISFDLPR	1
		VSEEIFFGR	1
AFM	3	AIPVTQYLK	1
		DADPDTFFAK	1
		LPNNVLQEK	1
AFMID	1	VAQAQPVDPTCR	1
AGA	2	ALASGGSALDAVESGCAMCER	1
		FLPSYQAVEYMR	1
AGAP3	2	ATPATAPGTSPR	1
		IETIAASSTPTPIR	1
AGFG1	3	APVGSVVSVPSQSSASSDK	1
		GTPSQSPVVGR	1
		SSAIPDFRDPQK	1
AGK	1	GETVPLDVLQIK	1
AGL	4	EVPQMCIPGK	1
		LEQGYELQFR	1
		NFAEPGSEVYLR	1
		SGSLAVDNADPILK	1
AGMAT	2	GSSTTLDPYR	1
		SLVPLMGEVR	1
AGO1	1	VLPAPILQYGGR	1
AGO2	2	SASFNTDPYVR	1
		VLQPPSILYGGR	1
AGPAT1	1	VLPPVPTEGLTPDDVPALADR	1
AGPAT5	1	VLSASQAFAAQR	1
AGPS	1	TIISLDTSQMNR	1
AGR2	4	HLSPDGQYVPR	1
		LYAYEPADTALLLDNMK	1
		LYAYEPADTALLLDNMKK	1
		VFAENKEIQK	1
AGR3	2	DLPLLIENMK	1
		NLSPDGQYVPR	1
AGRN	12	EAACLQQTQIEEAR	1
		EPLYVGGAPDFSK	1
		FDGPCDPCQGALPDPSR	1
		FGALCEAETGR	1
		LELGIGPGAATR	1
		SELFGETAR	1
		SFLAFPTLR	1
		SGCTPCSCDPQGAVR	1
		STVPVNTNR	1
		TPSLDAEGSNCPATK	1
		VLGAPVPAFEGR	1
		VLPEGGAQCECPLGR	1
AGT	3	ALQDQLVLVAAK	1
		DPTFIPAPIQAK	1
		SLDFTELDVAAEK	1
AGTRAP	1	SAYQTIDSAEAPADPFAVPEGR	1
AHCTF1	1	LLGCQSIEK	1
AHCY	10	AGIPVYAWK	1
		ALDIAENEMPGLMR	1
		ATDVMIAGK	1
		GISEETTTGVHNLYK	1
		VADIGLAAWGR	1
		VAVVAGYGDVGK	1
		VNIKPQVDR	1
		VPAINVNDSVTK	1
		WLNENAVEK	1
		YPQLLPGIR	1
AHCYL1	2	SMPDAMPLPGVGEELK	1
		TTDVMFGGK	1
AHCYL2	1	SVQVVSAAAAAK	1
AHNAK	117	ADIDVSGPSVDTDAPDLDIEGPEGK	1
		ADIEISGPK	1
		ADLGVSGPK	1
		ADVDISGPK	1
		ADVDVSGPK	1
		ADVVVSGPK	1
		AEAPLPSPK	1
		AEGPDVAVDLPK	1
		AEGPEVDVNLPK	1
		AGAISASGPELQGAGHSK	1
		ANVDISAPK	1
		AVEVQGPSLESGDHGK	1
		DDGVFVQEVTQNSPAAR	1
		DIDISSPEFK	1
		ELLLPNWQGSGSHGLTIAQR	1
		GDFDVSVPK	1
		GDISISGPK	1
		GDLDASVPSMK	1
		GDLDIAGPNLEGDFK	1
		GDMDISLPK	1
		GDMDISVPK	1
		GDMDVSLPK	1
		GDMDVSVPK	1
		GDVDISLPK	1
		GDVDVSLPEVEGEMK	1
		GDVDVSLPK	1
		GDVDVSVPEVEGK	1
		GDVDVSVPK	1
		GDVDVTLPK	1
		GDVVVSLPK	1
		GEGPDVDVNLPK	1
		GEGPDVDVSLPK	1
		GEGPDVDVTLPK	1
		GEGPEFDVNLSK	1
		GEGPEVDMNLPK	1
		GEGPEVDVNLPK	1
		GEGPEVDVTLPK	1
		GEIDASVPELEGDLR	1
		GEVDVSLANVEGDLK	1
		GEYDVTMPK	1
		GGVDVTLPR	1
		GGVQVPAVDISSSLGGR	1
		GGVTGSPEASISGSK	1
		GNVDISAPK	1
		GPAFNMASPESDFGINLK	1
		GPEVDVSGPK	1
		GPGVDLPSVNLSMPK	1
		GPGVDVNLK	1
		GPQITGPSLEGDLGLK	1
		GPQVSGELK	1
		GPQVSSALNLDTSK	1
		GPSLDIDTPDVNIEGPEGK	1
		GSEVGFHGAAPDISVK	1
		GSLGATGEIK	1
		IDVTAPDVSIEEPEGK	1
		IEGEMQVPDVDIR	1
		IKGDVDVTGPK	1
		ISAPNVDFNLEGPK	1
		ISMPDIDLNLK	1
		ISMPDIDLNLTGPK	1
		ISMPDVDFNLK	1
		ISMPDVDLNLK	1
		ISMPDVGLNLK	1
		ISMPDVNLNLK	1
		ISMPEIDLNLK	1
		ISMPEVDLNLK	1
		ISMQDVDLSLGSPK	1
		ISMSEVDLNVAAPK	1
		LEGPDVSLK	1
		LEVPDMNIR	1
		LNVGAPDVTLR	1
		LPSGSGAASPTGSAVDIR	1
		LPTGQISGPEIK	1
		LQVTMPGIK	1
		MDAEVPDVNIEGPDAK	1
		MPDVDISVPK	1
		MPFLSISSPK	1
		MPSLEISAPK	1
		MPTFSTPGAK	1
		MQVGGDGVK	1
		MSLPDVDLDLK	1
		SPEPGQTWTR	1
		SSGCDVNLPGVNVK	1
		TDVDVSLPK	1
		VDIDAPDVSIEGPDAK	1
		VDIDVPDVNIEGPDAK	1
		VDIDVPDVNIEGPEGK	1
		VDIDVPDVNLEAPEGK	1
		VDIEAPDVSLEGPEGK	1
		VDIEGPDVNIEGPEGK	1
		VDIETPNLEGTLTGPR	1
		VDINAPDVDVR	1
		VDINAPDVEVQGK	1
		VDTNAPDLSLEGPEGK	1
		VDVDIPDVNIEGPDAK	1
		VDVDVPDVNIEGPDAK	1
		VDVECPDVNIEGPEGK	1
		VDVEGPDVNIEGPEGK	1
		VDVEVPDVSLEGPEGK	1
		VEGDLKGPEIDVK	1
		VEGDLKGPEVDIR	1
		VEGDMQVPDLDIK	1
		VGGSGVNVNAK	1
		VGVEVPDVNIEGPEGK	1
		VKGDVDVSLPK	1
		VNVEAPDVNLEGLGGK	1
		VPGIDATTK	1
		VQANLGAPDINIEGLDAK	1
		VQTPEVDVK	1
		VSAPEVSVGHK	1
		VSAPGVQGDVK	1
		VSGPDLDLNLK	1
		VSMPDVDLNLK	1
		VSMPDVELNLK	1
		VSVGAPDLSLEASEGSIK	1
		VTAPDVDLHLK	1
		VTAYTVDVTGR	1
AHNAK2	12	AEVTAPDVK	1
		DTTEGGTQIGPPEIR	1
		LCEGTPQEGGLR	1
		LEGDLSLADK	1
		LPEGPLPEGAGFK	1
		LPEGPVPEGAGLK	1
		MPSFGVSAPGK	1
		SIEASVDVPAPK	1
		SMEASVDVSAPK	1
		TGSGQGPSSTGQPGR	1
		VEADVSLPSMQGDLK	1
		VQAGQVDVK	1
AHSA1	2	EAMGIYISTLK	1
		ETFLTSPEELYR	1
AHSG	3	EHAVEGDCDFQLLK	1
		HTLNQIDEVK	1
		TVVQPSVGAAAGPVVPPCPGR	1
AHSP	1	QQVTGEPQER	1
AIDA	1	DLNGIDLTPVQDTPVASR	1
AIF1	1	YSSDEDLPSK	1
AIFM1	5	ALGTEVIQLFPEK	1
		ELWFSDDPNVTK	1
		ISGLGLTPEQK	1
		LNDGSQITYEK	1
		TGGLEIDSDFGGFR	1
AIMP1	5	AQTMSNSGIK	1
		GAEADQIIEYLK	1
		GVLSQAMVMCASSPEK	1
		ITFDAFPGEPDKELNPK	1
		QQSIAGSADSKPIDVSR	1
AIMP2	3	FSIQTMCPIEGEGNIAR	1
		SCENLAPFNTALK	1
		VELPTCMYR	1
AIP	3	GELPDFQDGTK	1
		NIAVGKDPLEGQR	1
		VLELDPALAPVVSR	1
AK1	4	ATEPVIAFYEK	1
		EVQQGEEFER	1
		IIFVVGGPGSGK	1
		VDDNEETIK	1
AK2	7	AMVASGSELGK	1
		APSVPAAEPEYPK	1
		AVLLGPPGAGK	1
		LQAYHTQTTPLIEYYR	1
		LVSDEMVVELIEK	1
		NGFLLDGFPR	1
		QAEMLDDLMEK	1
AK3	7	AVIMGAPGSGK	1
		GTEIGVLAK	1
		GVLETFSGTETNK	1
		LIPDDVMTR	1
		TLPQAEALDR	1
		TVGIDDLTGEPLIQR	1
		VYNIEFNPPK	1
AK4	2	AVILGPPGSGK	1
		LMMSELENR	1
AKAP1	2	SIPLECPLSSPK	1
		VVSTPPSVTEPPEK	1
AKAP10	1	VSDLGQFIR	1
AKAP12	9	AITPQAQEELQK	1
		LVQNIIQTAVDQFVR	1
		QLLQTVNVPIIDGAK	1
		SAESPTSPVTSETGSTFK	1
		STPVIVSATTK	1
		SVPEDDGHALLAER	1
		TQEVLQAVAEK	1
		VKEESQLPGTGGPEDVLQPVQR	1
		VVGQTTPESFEK	1
AKAP13	2	GADLIEEAASR	1
		LCDNIVSESESTTAR	1
AKAP8	1	IQFACSVCK	1
AKAP9	3	QLLNESQQK	1
		TTAAVEETIGR	1
		VESTVIPESTIMR	1
AKR1A1	6	AASCVLLHTGQK	1
		AVPREELFVTSK	1
		DAGHPLYPFNDPY	1
		GLEVTAYSPLGSSDR	1
		VFDFTFSPEEMK	1
		YIVPMLTVDGK	1
AKR1B1	2	REELFIVSK	1
		SPPGQVTEAVK	1
AKR1B10	1	IVENIQVFDFK	1
AKR7A2	4	ALQAAYGASAPSVTSAALR	1
		MDAPASAAAVR	1
		RMDAPASAAAVR	1
		VASVLGTMEMGR	1
AKR7A3	2	ALQAAYGASAPSMTSATLR	1
		FYAFNPLAGGLLTGK	1
ALAD	7	AAVLEAMTAFR	1
		AGCQVVAPSDMMDGR	1
		CVLIFGVPSR	1
		GSAADSEESPAIEAIHLLR	1
		LAEVALAYAK	1
		LEEMLRPLVEEGLR	1
		VSVMSYSAK	1
ALB	34	AACLLPKLDELR	1
		AAFTECCQAADK	1
		ADDKETCFAEEGK	1
		AEFAEVSKLVTDLTK	1
		AVMDDFAAFVEK	1
		CCAAADPHECYAK	1
		CCTESLVNR	1
		DVCKNYAEAK	1
		DVFLGMFLYEYAR	1
		ECCEKPLLEK	1
		EFNAETFTFHADICTLSEK	1
		ETCFAEEGK	1
		ETYGEMADCCAK	1
		FKDLGEENFK	1
		FPKAEFAEVSK	1
		KLVAASQAALGL	1
		KQTALVELVK	1
		KVPQVSTPTLVEVSR	1
		LAKTYETTLEK	1
		LDELRDEGK	1
		LVAASQAALGL	1
		LVNEVTEFAK	1
		LVRPEVDVMCTAFHDNEETFLK	1
		MPCAEDYLSVVLNQLCVLHEK	1
		QNCELFEQLGEYK	1
		QTALVELVK	1
		RPCFSALEVDETYVPK	1
		SHCIAEVENDEMPADLPSLAADFVESK	1
		SLHTLFGDK	1
		TCVADESAENCDK	1
		VFDEFKPLVEEPQNLIK	1
		VPQVSTPTLVEVSR	1
		VTKCCTESLVNR	1
		YICENQDSISSK	1
ALCAM	3	LDVPQNLMFGK	1
		QIGDALPVSCTISASR	1
		SSNTYTLTDVR	1
ALDH16A1	5	DPSVPTGGCK	1
		GAAACDLVQR	1
		GGSASVWSER	1
		GLDGAVDMGAR	1
		VAFCGAPEEGR	1
ALDH18A1	8	EAVQLVNTR	1
		EMAIPVLEAR	1
		GDECGLALGR	1
		GPVGLEGLLTTK	1
		LNSLAIGLR	1
		MLATLEPEQR	1
		QIAASSQDSVGR	1
		YLHENLPIPQR	1
ALDH1A1	8	EEIFGPVQQIMK	1
		GYFVQPTVFSNVTDEMR	1
		ILDLIESGK	1
		ILDLIESGKK	1
		QAFQIGSPWR	1
		SSSGTPDLPVLLTDLK	1
		TIPIDGNFFTYTR	1
		VAFTGSTEVGK	1
ALDH1A3	3	AVEAAQVAFQR	1
		FATCNPSTR	1
		TIPTDDNVVCFTR	1
ALDH1B1	6	EEIFGPVQPLFK	1
		IAKEEIFGPVQPLFK	1
		LAPALATGNTVVMK	1
		TFPTVNPTTGEVIGHVAEGDR	1
		VLGYIQLGQK	1
		YGLAAAVFTR	1
ALDH1L1	1	EESFGPVMIISR	1
ALDH2	13	AAFQLGSPWR	1
		EEIFGPVMQILK	1
		ELGEYGLQAYTEVK	1
		GYFIQPTVFGDVQDGMTIAK	1
		ILGYINTGK	1
		LGPALATGNVVVMK	1
		LLCGGGIAADR	1
		TEQGPQVDETQFK	1
		TIPIDGDFFSYTR	1
		VAFTGSTEIGR	1
		VIQVAAGSSNLK	1
		VIQVAAGSSNLKR	1
		VVGNPFDSK	1
ALDH3A2	2	ILSLLEGQK	1
		YIAPTVLTDVDPK	1
ALDH4A1	8	AADMLSGPR	1
		AIEAALAAR	1
		NAAGNFYINDK	1
		SADVESVVSGTLR	1
		SAFEYGGQK	1
		SSPSLTILAGGK	1
		STGSIVGQQPFGGAR	1
		VANEPVLAFTQGSPER	1
ALDH5A1	4	EVGEAICTDPLVSK	1
		GATVVTGGK	1
		ISFTGSTTTGK	1
		LAGLSAALLR	1
ALDH6A1	6	AEMDAAIASCK	1
		AFPAWADTSVLSR	1
		AISFVGSNK	1
		TLADAEGDVFR	1
		VCNLIDSGTK	1
		VPGATMLLAK	1
ALDH7A1	7	DLPLAQGIK	1
		GEVITTYCPANNEPIAR	1
		IWADIPAPK	1
		MIGGPILPSER	1
		QGLSSSIFTK	1
		QVGLMVQER	1
		STCTINYSK	1
ALDH9A1	13	ANDTTFGLAAGVFTR	1
		EILDKFTEEVVK	1
		EVNLAVQNAK	1
		GIKPVTLELGGK	1
		IGDPLLEDTR	1
		SPLIIFSDCDMNNAVK	1
		STGTFVVSQPLNYR	1
		TVCVEMGDVESAF	1
		VEPADASGTEK	1
		VEPADASGTEKAFEPATGR	1
		VIATFTCSGEK	1
		VLCGGDIYVPEDPK	1
		VSFTGSVPTGMK	1
ALDOA	15	AAQEEYVKR	1
		ADDGRPFPQVIK	1
		ALANSLACQGK	1
		FSHEEIAMATVTALR	1
		GILAADESTGSIAK	1
		GILAADESTGSIAKR	1
		GVVPLAGTNGETTTQGLDGLSER	1
		IGEHTPSALAIMENANVLAR	1
		IVAPGKGILAADESTGSIAK	1
		LQSIGTENTEENR	1
		LQSIGTENTEENRR	1
		PYQYPALTPEQK	1
		QLLLTADDR	1
		SKGGVVGIK	1
		VNPCIGGVILFHETLYQK	1
ALDOB	5	ETTIQGLDGLSER	1
		FPALTQEQK	1
		GILAADESVGTMGNR	1
		IADQCPSSLAIQENANALAR	1
		LDQGGAPLAGTNK	1
ALDOC	9	ALQASALNAWR	1
		DNAGAATEEFIK	1
		GILAADESVGSMAK	1
		GVVPLAGTDGETTTQGLDGLSER	1
		LSQIGVENTEENR	1
		LSQIGVENTEENRR	1
		QVLFSADDR	1
		VDKGVVPLAGTDGETTTQGLDGLSER	1
		YTPEEIAMATVTALR	1
ALG1	1	DAGSGLVTR	1
ALG11	1	INIPFDELK	1
ALG5	2	ETLPSIWDSPTK	1
		QLSVVVPSYNEEK	1
ALKBH5	1	VSEPVLSLPVR	1
ALKBH7	1	AGTGLLALR	1
ALOX15	3	EITEIGLQGAQDR	1
		GFPVSLQAR	1
		TVGEDPQGLFQK	1
ALOX5	2	AMENLFINR	1
		DDGLLVWEAIR	1
ALPI	1	GSSIFGLAPSK	1
ALYREF	3	ADKMDMSLDDIIK	1
		MDMSLDDIIK	1
		SLGTADVHFER	1
AMACR	3	LQLGPEILQR	1
		LSGFGQSGSFCR	1
		SDVLLEPFR	1
AMBP	4	EYCGVPGDGDEELLR	1
		GECVPGEQEPEPILIPR	1
		TVAACNLPIVR	1
		VVAQGVGIPEDSIFTMADR	1
AMDHD2	1	IVTLAPELGR	1
AMFR	1	IQVPFPTQR	1
AMPD2	5	EIAEELFTR	1
		GGLGAPPLQSAR	1
		NPLPEYLSR	1
		SLPGPAPCLK	1
		YNPIGESVLR	1
AMPD3	2	LNISEVDEQVR	1
		TENYLGGEYFAR	1
AMT	1	IGTVTSGCPSPSLK	1
ANAPC1	2	DLQEFVPFGR	1
		SPSISNMAALSR	1
ANK1	3	EADAATSFLR	1
		LDQVVESPAIPR	1
		LSTPPPLAEEEGLASR	1
ANK2	4	AMIVPSSPSK	1
		GAAVDFTAR	1
		LATMPPMVEGEGLASR	1
		TELLTEVASVR	1
ANK3	3	AAAVDFTAR	1
		LANPPPMVEGEGLASR	1
		YLVQDGAQVEAK	1
ANKFY1	1	NQLPLVVDAICTR	1
ANKHD1	3	LSVPASVVSR	1
		MESFSAVPPTK	1
		SAPAGASEPPPPGGVGLGIR	1
ANKMY2	1	GTVQEAGTLLSSK	1
ANKRD13A	2	ELQGQNVEAVDPR	1
		LTSPVINTSLDTK	1
ANKRD28	2	TPLDLAAFK	1
		TVSFEALPIMR	1
ANKS4B	1	AATAQNIMNPK	1
ANKS6	1	LLEPGAAEPAER	1
ANO9	1	ADNSVFGLYR	1
ANP32B	1	IFGGLDMLAEK	1
ANP32E	1	DLSTVEALQNLK	1
ANPEP	11	AQIINDAFNLASAHK	1
		DHSAIPVINR	1
		DLMVLNDVYR	1
		DLTALSNMLPK	1
		ENSLLFDPLSSSSSNK	1
		GVGGSQPPDIDK	1
		MLSSFLSEDVFK	1
		SFPCFDEPAMK	1
		SIQLPTTVR	1
		VVATTQMQAADAR	1
		YLSYTLNPDLIR	1
ANXA1	10	AAYLQETGKPLDETLK	1
		DITSDTSGDFR	1
		GGPGSAVSPYPTFNPSSDVAALHK	1
		GLGTDEDTLIEILASR	1
		GTDVNVFNTILTTR	1
		GVDEATIIDILTK	1
		ILVALCGGN	1
		SEDFGVNEDLADSDAR	1
		SEIDMNDIK	1
		TPAQFDADELR	1
ANXA11	10	DAQELYAAGENR	1
		DESTNVDMSLAQR	1
		EMSGDLEEGMLAVVK	1
		GFGTDEQAIIDCLGSR	1
		GTITDAPGFDPLR	1
		GTITDAPGFDPLRDAEVLR	1
		LLISLSQGNR	1
		NTPAFFAER	1
		SETDLLDIR	1
		TPVLFDIYEIK	1
ANXA13	4	AEVDLQGIK	1
		ASSPQGFDVDR	1
		ILVSLLQANR	1
		TALALLDRPSEYAAR	1
ANXA2	5	AEDGSVIDYELIDQDAR	1
		DLYDAGVKR	1
		GVDEVTIVNILTNR	1
		QDIAFAYQR	1
		RAEDGSVIDYELIDQDAR	1
ANXA3	11	ALLTLADGR	1
		ALLTLADGRR	1
		DISQAYYTVYK	1
		DYPDFSPSVDAEAIQK	1
		GAGTNEDALIEILTTR	1
		GIGTDEFTLNR	1
		MLISILTER	1
		NTPAFLAER	1
		SDTSGDYEITLLK	1
		SEIDLLDIR	1
		SLGDDISSETSGDFRK	1
ANXA4	13	AASGFNAMEDAQTLR	1
		AASGFNAMEDAQTLRK	1
		AEIDMLDIR	1
		DEGNYLDDALVR	1
		GAGTDEGCLIEILASR	1
		GLGTDDNTLIR	1
		GLGTDEDAIISVLAYR	1
		ISQTYQQQYGR	1
		QDAQDLYEAGEK	1
		SDTSFMFQR	1
		SETSGSFEDALLAIVK	1
		VLLVLCGGDD	1
		VLVSLSAGGR	1
ANXA5	10	ALLLLCGEDD	1
		ETSGNLEQLLLAVVK	1
		GAGTDDHTLIR	1
		GLGTDEESILTLLTSR	1
		GTVTDFPGFDER	1
		MLVVLLQANR	1
		NFATSLYSMIK	1
		QVYEEEYGSSLEDDVVGDTSGYYQR	1
		SEIDLFNIR	1
		VLTEIIASR	1
ANXA6	24	ALIEILATR	1
		ALLALCGGED	1
		CLIEILASR	1
		DAFVAIVQSVK	1
		DAISGIGTDEK	1
		DLEADIIGDTSGHFQK	1
		EAILDIITSR	1
		EDAQVAAEILEIADTPSGDK	1
		EDAQVAAEILEIADTPSGDKTSLETR	1
		EEGGENLDQAR	1
		EIKDAISGIGTDEK	1
		GLGTDEDTIIDIITHR	1
		GTVRPANDFNPDADAK	1
		LIVGLMRPPAYCDAK	1
		MLVVLLQGTR	1
		MTNYDVEHTIK	1
		SEIDLLNIR	1
		SEISGDLAR	1
		SELDMLDIR	1
		SLEDALSSDTSGHFR	1
		SLHQAIEGDTSGDFLK	1
		STPEYFAER	1
		TNEQMHQLVAAYK	1
		TTGKPIEASIR	1
ANXA7	8	EFSGYVESGLK	1
		GFGTDEQAIVDVVANR	1
		LGTDESCFNMILATR	1
		LLVSMCQGNR	1
		QMFAQMYQK	1
		SEIDLVQIK	1
		TLGTMIAGDTSGDYR	1
		VLIEILCTR	1
AOC1	5	ALCLFEMPTGVPLR	1
		GDFPSPIHVSGPR	1
		LQPSSTTTMAK	1
		VDLDVAGTK	1
		VVQPTLEQTQYSWER	1
AOC3	7	DAFCVFEQNQGLPLR	1
		DAFCVFEQNQGLPLRR	1
		EALAIVFFGR	1
		LLEMEEQAAFLVGSATPR	1
		NLVTMTTAPR	1
		SPVPPGPAPPLQFYPQGPR	1
		YVDGGFGMGK	1
AOX1	1	VFFGEGDGIIR	1
AP1B1	4	DIPNENEAQFQIR	1
		GLEISGTFTR	1
		LLSTDPVAAK	1
		LQSSNIFTVAK	1
AP1G1	3	AVEYNALFK	1
		TVQTDHNAVQR	1
		VLTTAGSYVR	1
AP1G2	2	AVEYDTLFR	1
		LQDLIEEIR	1
AP1M2	2	ILQEYITQQSNK	1
		YITQSGDYQLR	1
AP1S1	1	ELMQVVLAR	1
AP2A1	9	AADLLYAMCDR	1
		DFLTPPLLSVR	1
		EMGEAFAADIPR	1
		FINLFPETK	1
		ILVAGDSMDSVK	1
		LEPNAQAQMYR	1
		LLQCYPPPEDAAVK	1
		QLSLPQQEAQK	1
		YGGAPQALTLK	1
AP2A2	6	AVDLLYAMCDR	1
		EMAEAFAGEIPK	1
		LEPNLQAQMYR	1
		LLQCYPPPDPAVR	1
		TTQIGCLLR	1
		VLVAGDTMDSVK	1
AP2B1	2	IQPGNPNYTLSLK	1
		LLSTDPVTAK	1
AP2M1	1	SISFIPPDGEFELMR	1
AP3B1	6	EASADLSPYVR	1
		LLDSITVPVAR	1
		NVEVIELAK	1
		QFAAATIQTIGR	1
		TVIGSVLLR	1
		VVNVANVGAVPSGQDNIHR	1
AP3D1	4	ASCILQLVK	1
		GMELSVLDSLNAR	1
		LLESGDLSMSSIK	1
		VDSCASMYSR	1
AP3M1	2	VLSFIPPDGNFR	1
		VSSQNLVAIPVYVK	1
AP3S1	3	NINIGDISIK	1
		NMNLPEIPR	1
		SEAGLAGAPAR	1
AP3S2	1	SEGGLSAAPAR	1
AP4S1	1	ILAPLLILDK	1
APAF1	1	SVLAAEAVR	1
APBB1IP	3	DVLDNLFEK	1
		SSDTSGSPATPLK	1
		SSLPPPPPVR	1
APCS	4	AYSLFSYNTQGR	1
		IVLGQEQDSYGGK	1
		QGYFVEAQPK	1
		VGEYSLYIGR	1
APEH	9	ALDVSASDDEIAR	1
		CELLSDDSLAVSSPR	1
		QPALSAACLGPEVTTQYGGQYR	1
		QVLLSEPEEAAALYR	1
		SALYYVDLIGGK	1
		SFNLSALEK	1
		TPLLLMLGQEDR	1
		VGFLPSAGK	1
		VTSVVVDVVPR	1
APEX1	3	EGYSGVGLLSR	1
		ICSWNVDGLR	1
		NAGFTPQER	1
API5	2	ELPQFATGENLPR	1
		TLPDEVLTK	1
APLF	1	VALAPGETVIGR	1
APMAP	6	DDEPVCGRPLGIR	1
		EPPLLLGVLHPNTK	1
		IYFTDSSSK	1
		LFSQETVMK	1
		LLEYDTVTR	1
		LLLSSETPIEGK	1
APOA1	17	AKPALEDLR	1
		ATEHLSTLSEK	1
		DLATVYVDVLK	1
		DSGRDYVSQFEGSALGK	1
		DYVSQFEGSALGK	1
		EQLGPVTQEFWDNLEK	1
		LLDNWDSVTSTFSK	1
		LSPLGEEMR	1
		LSPLGEEMRDR	1
		QGLLPVLESFK	1
		THLAPYSDELR	1
		VEPLRAELQEGAR	1
		VKDLATVYVDVLK	1
		VQPYLDDFQK	1
		VQPYLDDFQKK	1
		VSFLSALEEYTK	1
		WQEEMELYR	1
APOA2	3	SKEQLTPLIK	1
		SPELQAEAK	1
		VKSPELQAEAK	1
APOA4	14	ALVQQMEQLR	1
		IDQNVEELK	1
		IDQTVEELRR	1
		ISASAEELR	1
		LAPLAEDVR	1
		LEPYADQLR	1
		LGEVNTYAGDLQK	1
		LLPHANEVSQK	1
		LTPYADEFK	1
		LVPFATELHER	1
		SLAPYAQDTQEK	1
		TQVSTQAEQLR	1
		VEPYGENFNK	1
		VNSFFSTFK	1
APOB	47	ALVEQGFTVPEIK	1
		ATGVLYDYVNK	1
		AVSMPSFSILGSDVR	1
		DLKVEDIPLAR	1
		DNVFDGLVR	1
		EELCTMFIR	1
		EFQVPTFTIPK	1
		ENFAGEATLQR	1
		ESDEETQIK	1
		ESQLPTVMDFR	1
		EVGTVLSQVYSK	1
		EVYGFNPEGK	1
		FPEVDVLTK	1
		FVTQAEGAK	1
		GFEPTLEALFGK	1
		GIISALLVPPETEEAK	1
		GTYGLSCQR	1
		IEIPLPFGGK	1
		IGQDGISTSATTNLK	1
		ITENDIQIALDDAK	1
		LAPGELTIIL	1
		LDFSSQADLR	1
		LDNIYSSDK	1
		LDVTTSIGR	1
		LSNVLQQVK	1
		LTISEQNIQR	1
		MGLAFESTK	1
		MTSNFPVDLSDYPK	1
		NIILPVYDK	1
		NMEVSVATTTK	1
		NNALDFVTK	1
		NSEEFAAAMSR	1
		NTFTLSCDGSLR	1
		QTEATMTFK	1
		SEYQADYESLR	1
		SGSSTASWIQNVDTK	1
		SPAFTDLHLR	1
		SPSQADINK	1
		SVSDGIAALDLNAVANK	1
		SVSLPSLDPASAK	1
		TEVIPPLIENR	1
		TGISPLALIK	1
		TLADLTLLDSPIK	1
		TLQGIPQMIGEVIR	1
		TSSFALNLPTLPEVK	1
		VPQTDMTFR	1
		VSTAFVYTK	1
APOBR	8	AILDGEEAR	1
		EAEVSPFPK	1
		GQGPELMGGAQTPTK	1
		GSQVEAFESR	1
		HDGTPVPAR	1
		LLDAEGLMVTGGR	1
		QPQVLGTER	1
		TEEAAESQTAGR	1
APOC1	1	EWFSETFQK	1
APOC2	2	TAAQNLYEK	1
		TYLPAVDEK	1
APOC3	2	DALSSVQESQVAQQAR	1
		GWVTDGFSSLK	1
APOD	4	CPNPPVQENFDVNK	1
		MTVTDQVNCPK	1
		NILTSNNIDVK	1
		NPNLPPETVDSLK	1
APOE	10	AATVGSLAGQPLQER	1
		AKLEEQAQQIR	1
		GEVQAMLGQSTEELR	1
		LAVYQAGAR	1
		LEEQAQQIR	1
		LGADMEDVCGR	1
		LGPLVEQGR	1
		LQAEAFQAR	1
		QQTEWQSGQR	1
		VQAAVGTSAAPVPSDNH	1
APOH	3	ATVVYQGER	1
		TCPKPDDLPFSTVVPLK	1
		TDASDVKPC	1
APOL1	2	VNEPSILEMSR	1
		VTEPISAESGEQVER	1
APOL2	3	ISAEGGEQVER	1
		NLDQSGTNVAK	1
		VVEGPAQAMSR	1
APOO	1	SQLEESISQLR	1
APPL1	7	IYDAQNELSAATHLTSK	1
		LIDPQTQVTR	1
		QIYLSENPEETAAR	1
		SSILQAESK	1
		TGLVSSTWDR	1
		TNPFGESGGSTK	1
		VNQSALEAVTPSPSFQQR	1
APPL2	1	LIDPQTQVSR	1
APRT	5	ADSELQLVEQR	1
		AELEIQKDALEPGQR	1
		DISPVLKDPASFR	1
		IDYIAGLDSR	1
		SFPDFPTPGVVFR	1
AQR	3	SVPLSEPVTMDK	1
		VGVPTVDLDAQGR	1
		VIEDGPEPRPNLR	1
ARAF	4	GLNQDCCVVYR	1
		GSPSPASVSSGR	1
		IGTGSFGTVFR	1
		VSQPTAEQAQAFK	1
ARAP1	2	LGSVSLIPLR	1
		SFDLTTPYR	1
ARB2A	1	TGEPFVFNYR	1
ARCN1	10	ENVNLAQIR	1
		IEGLLAAFPK	1
		LFTAESLIGLK	1
		NSNILEDLETLR	1
		NTLEWCLPVIDAK	1
		NYCNIQVTK	1
		SEGETIMSSSMGK	1
		SFPVNSDVGVLK	1
		VAPAPARPSGPSK	1
		VTQVDGNSPVR	1
ARF4	3	DAVLLLFANK	1
		IQEVADELQK	1
		QDLPNAMAISEMTDK	1
ARF5	2	QDMPNAMPVSELTDK	1
		VQESADELQK	1
ARFGAP1	2	VSGQPQSVTASSDK	1
		YVGFGNTPPPQK	1
ARFGAP2	3	AISSDMFFGR	1
		LAYQELQIDR	1
		VSSQSFSEIER	1
ARFGEF1	2	IVSTSLDCLQK	1
		LSVSSNDTQESGNSSGPSPGAK	1
ARFGEF2	2	LDSTQVGDFLGDSAR	1
		VVSTSLDCLQK	1
ARFGEF3	1	VLETEAVDQPDVVQR	1
ARFIP1	5	EGVIEAGAFQGSPAPPLPSVMSPSR	1
		LAQQGSDLIVPAGGQR	1
		SGPVILADEIK	1
		TDLEELNLGPR	1
		TIEDTLMTVK	1
ARFIP2	1	TDLEELSLGPR	1
ARG1	2	GGVEEGPTVLR	1
		TIGIIGAPFSK	1
ARHGAP1	6	AINPINTFTK	1
		FLLDHQGELFPSPDPSGL	1
		NPEQEPIPIVLR	1
		NWPSDEMPDFPK	1
		SSSPELVTHLK	1
		VPATLQVLQTLPEENYQVLR	1
ARHGAP17	4	DPVSAAVPAPGR	1
		LVLDWDSVR	1
		SSGTNFQGLPSK	1
		TEVLSEDLLQIER	1
ARHGAP18	4	FLSQESGVAQTLK	1
		GLETEGLLR	1
		IGDLAPQDMK	1
		VETVSQTLR	1
ARHGAP25	1	LPGQDNLVK	1
ARHGAP26	1	SLQEFATVLR	1
ARHGAP30	1	LSGVSSNIQK	1
ARHGAP4	5	AVAQNMDSVFK	1
		QGLGPASTTSPSPGPR	1
		SVPTTTAGATEAGPLR	1
		VFPPLTSLPGPVYEK	1
		YITLPAGTEK	1
ARHGAP45	2	AGSPSPQPSGELPR	1
		QLPEPLISFR	1
ARHGAP9	1	YVFPEQPGQEGR	1
ARHGDIA	4	AEEYEFLTPVEEAPK	1
		AEQEPTAEQLAQIAAENEEDEHSVNYKPPAQK	1
		SIQEIQELDKDDESLR	1
		TDYMVGSYGPR	1
ARHGDIB	1	TLLGDGPVVTDPK	1
ARHGEF1	10	ADLISEDVQR	1
		ELVPPDTLHSLPK	1
		GEPQVPDFR	1
		GLSSILDAAR	1
		QSFALEQLK	1
		SGLELEPEEPPGWR	1
		TLTPTPDGK	1
		TQEIQENLLSLEETMK	1
		VELAAECCR	1
		VPVPPNVAFELDR	1
ARHGEF10L	4	LADQVAEIQQLTK	1
		LFQELQDLQK	1
		SPGLQPVLCLR	1
		TTFLLPGQK	1
ARHGEF12	2	LSEYPNVEELR	1
		TGTGDIATCYSPR	1
ARHGEF16	3	GDLPQVEITK	1
		IEPSELPLPGGGNR	1
		LDAGGNPASGLPMVR	1
ARHGEF17	1	LSSGGGSSSETVGR	1
ARHGEF18	2	GTLLSDGSPALSR	1
		SLSPILPGR	1
ARHGEF2	3	ILSQSTDSLNMR	1
		QALCPGSTR	1
		QATELALLQR	1
ARHGEF40	1	ALALDLGSPAALR	1
ARHGEF5	4	GPLPQASDPAVAR	1
		LESLSETPGPSSPR	1
		STESFTSTSR	1
		TTPQQGASGPGR	1
ARHGEF6	1	TICDPEEFLK	1
ARHGEF7	3	LPTTGMTITK	1
		NAFEISGSMIER	1
		NLSAQCQEVR	1
ARID1A	9	AAAGQESEGPAVGPPQPLGK	1
		AAGPGLGNVAMGPR	1
		AAQVAPAAASSLGNPPPPPPSELK	1
		AAQVAPAAASSLGNPPPPPPSELKK	1
		AMGMTNLPAVGR	1
		GPSPSPVGSPASVAQSR	1
		SAYPPPAPAYALSSPR	1
		TPQPSSPMDQMGK	1
		YPPQQQQQQQQR	1
ARID1B	1	AAAGSAAGGFQR	1
ARID3A	1	MALVADEQQR	1
ARIH1	2	DISQDSLQDIK	1
		EVNEVIQNPATITR	1
ARL1	1	ILILGLDGAGK	1
ARL2	3	ELQSLLVEER	1
		EVLELDSIR	1
		QDLPGALSSNAIR	1
ARL2BP	2	SSSLPASQNNLR	1
		YIEEQLLQR	1
ARL3	1	ILLLGLDNAGK	1
ARL6IP4	1	GDCLAFQMR	1
ARL6IP5	2	AWDDFFPGSDR	1
		MDVNIAPLR	1
ARL8A	1	DLPGALDEKELIEK	1
ARMC10	1	ELGGIPIVANK	1
ARMC6	2	DLGCHVELR	1
		IAQETFDAAVR	1
ARMC8	2	ANLIVLGAVPR	1
		SLSTEQLFR	1
ARMC9	1	ENVLGALQK	1
ARMCX3	2	DLGGLPIVAK	1
		LNSSVQLAGLR	1
ARPC1A	1	TLESSIQGLR	1
ARPC1B	3	ASSEGGTAAGAGLDSLHK	1
		NSVSQISVLSGGK	1
		TWKPTLVILR	1
ARPC2	7	DNTINLIHTFR	1
		DSIVHQAGMLK	1
		ELQAHGADELLK	1
		IIEETLALK	1
		NCFASVFEK	1
		VTVVFSTVFKDDDDVVIGK	1
		YFQFQEEGK	1
ARPC3	1	LIGNMALLPIR	1
ARPC4	3	ELLLQPVTISR	1
		TATLRPYLSAVR	1
		VLIEGSINSVR	1
ARPC5	3	ALAAGGVGSIVR	1
		QGNMTAALQAALK	1
		SKNTVSSAR	1
ARPC5L	2	ALAVGGLGSIIR	1
		SSEIEQAVQSLDR	1
ARPIN	3	GDGPFLDSLAK	1
		GNEIEPNFSATR	1
		TGASWTDNIMAQK	1
ARPP19	1	TEVTGDHIPTPQDLPQR	1
ARRB1	2	EDLDVLGLTFR	1
		VQYAPERPGPQPTAETTR	1
ARRDC1	2	VTCIGSCGVSNK	1
		VVYSPGEPLAGTVR	1
ARSA	2	MGMYPGVLVPSSR	1
		QSLFFYPSYPDEVR	1
ARSB	1	GVGFVASPLLK	1
ARSL	2	SGMVSSIGYR	1
		TLSPVPLQLDR	1
ASAH1	4	DCPDPCIGW	1
		LTVYTTLIDVTK	1
		NMINTFVPSGK	1
		STYPPSGPTYR	1
ASAP1	1	LALPGFSTPR	1
ASB15	1	LPLPPAIQR	1
ASCC1	1	FQASGLIVK	1
ASCC3	3	GPVLESIVAR	1
		QVESTQSMIR	1
		TGYFSSTDLGR	1
ASH2L	1	SDPLFSAQR	1
ASL	8	DVLFPGYTHLQR	1
		ELIGATAGK	1
		FNASIAYDR	1
		FVGAVDPIMEK	1
		INVLPLGSGAIAGNPLGVDR	1
		NDQVVTDLR	1
		NPDSLELIR	1
		VAEEWAQGTFK	1
ASMTL	3	ETLPPFPTR	1
		FSSACDVGGCTGALAR	1
		VVLASASPR	1
ASPH	4	ETGYTELVK	1
		GLFLPEDENLR	1
		IAESIPYLK	1
		SSGNSSSSGSGSGSTSAGSSSPGAR	1
ASPN	3	IPSGLPELK	1
		ISTVELEDFK	1
		VVHCSDLGLTSVPTNIPFDTR	1
ASPSCR1	5	AAGSPSPLPAPDPAPK	1
		APAAAPFVPFSGGGQR	1
		FANLPNNAK	1
		IALQLDDGSR	1
		LEEAPLVTK	1
ASRGL1	1	AATVGYGILR	1
ASS1	5	APNTPDILEIEFK	1
		FELSCYSLAPQIK	1
		KVFIEDVSR	1
		NQAPPGLYTK	1
		YVSHGATGK	1
ATAT1	1	AAAVDPTPAAPAR	1
ATF2	1	NDSVIVADQTPTPTR	1
ATF7	1	TDSVIIADQTPTPTR	1
ATG4B	2	MDAATLTYDTLR	1
		TSVPCAGATAFPADSDR	1
ATG5	2	EAEPYYLLLPR	1
		SQVINEMQK	1
ATG9A	1	YGGITDPGTVPR	1
ATIC	13	ALFEEVPELLTEAEK	1
		APGQLALFSVSDK	1
		DVSELTGFPEMLGGR	1
		EALGIPAAASFK	1
		HVSPAGAAVGIPLSEDEAK	1
		MSSFGDFVALSDVCDVPTAK	1
		NIPEDNADMAR	1
		SGVAYIAAPSGSAADK	1
		SLFSNVVTK	1
		TLTPISAAYAR	1
		VCMVYDLYK	1
		VVACNLYPFVK	1
		YTQSNSVCYAK	1
ATL3	1	ALASILLQDHIR	1
ATM	1	SLLTDCFPK	1
ATP10B	1	LQEGVPDTIATLR	1
ATP13A1	6	DSPTLSNSGIR	1
		EVTPVSSIPVETHR	1
		LGDASIAAPFTSK	1
		SIDGSIVLPLAR	1
		TGTLTSDSLVVR	1
		VLDLQADSR	1
ATP1A1	11	AVAGDASESALLK	1
		AVFQANQENLPILK	1
		CIELCCGSVK	1
		DGPNALTPPPTTPEWIK	1
		DMTSEQLDDILK	1
		GIVVYTGDR	1
		IVEIPFNSTNK	1
		NIAFFSTNCVEGTAR	1
		NPNTSEPQHLLVMK	1
		SPDFTNENPLETR	1
		TSATWLALSR	1
ATP1B1	4	AYGENIGYSEK	1
		SYEAYVLNIVR	1
		VAPPGLTQIPQIQK	1
		YNPNVLPVQCTGK	1
ATP1B3	2	IIGLKPEGVPR	1
		SDPTSYAGYIEDLK	1
ATP2A2	7	ANACNSVIK	1
		EFDELNPSAQR	1
		EWGSGSDTLR	1
		HTDPVPDPR	1
		IGIFGQDEDVTSK	1
		MNVFDTELK	1
		NYLEPGKECVQPATK	1
ATP2A3	4	MEAAHLLPAADVLR	1
		TAPLTPTSR	1
		VDQSILTGESVSVTK	1
		VVMITGDNK	1
ATP2B1	3	GIIDSTVSDQR	1
		TSPNEGLSGNPADLER	1
		TVIEPMASEGLR	1
ATP2B4	4	QIPSPDVFLPK	1
		TSPVEGLSGNPADLEK	1
		TVIEPMACDGLR	1
		VLPANSMAESR	1
ATP5F1A	15	AVDSLVPIGR	1
		EAYPGDVFYLHSR	1
		EIVTNFLAGFEA	1
		EVAAFAQFGSDLDAATQQLLSR	1
		GMSLNLEPDNVGVVVFGNDK	1
		ILGADTSVDLEETGR	1
		ISVREPMQTGIK	1
		NVQAEEMVEFSSGLK	1
		RLTDADAMK	1
		TGAIVDVPVGEELLGR	1
		TGTAEMSSILEER	1
		TSIAIDTIINQK	1
		VLSIGDGIAR	1
		VVDALGNAIDGK	1
		VVDALGNAIDGKGPIGSK	1
ATP5F1B	17	AIAELGIYPAVDPLDSTSR	1
		DQEGQDVLLFIDNIFR	1
		FLSQPFQVAEVFTGHMGK	1
		FTQAGSEVSALLGR	1
		IGLFGGAGVGK	1
		IMDPNIVGSEHYDVAR	1
		IMNVIGEPIDER	1
		IPSAVGYQPTLATDMGTMQER	1
		IPVGPETLGR	1
		LVLEVAQHLGESTVR	1
		SLQDIIAILGMDELSEEDKLTVSR	1
		TIAMDGTEGLVR	1
		VALTGLTVAEYFR	1
		VALVYGQMNEPPGAR	1
		VLDSGAPIK	1
		VLDSGAPIKIPVGPETLGR	1
		VVDLLAPYAK	1
ATP5F1C	4	ELIEIISGAAALD	1
		EVMLVGIGDK	1
		MTAMDNASK	1
		SEVATLTAAGK	1
ATP5F1D	2	AQAELVGTADEATR	1
		IEANEALVK	1
ATP5ME	1	VPPVQVSPLIK	1
ATP5MF	1	ASVGECPAPVPVK	1
ATP5MG	2	IVNSAQTGSFK	1
		VELVPPTPAEIPR	1
ATP5PD	1	SWNETLTSR	1
ATP5PF	4	FEDPKFEVIEKPQA	1
		FEVIEKPQA	1
		QMFGNADMNTFPTFK	1
		QTSGGPVDASSEYQQELER	1
ATP5PO	5	LVRPPVQVYGIEGR	1
		SFLSQGQVLK	1
		TDPSILGGMIVR	1
		VAASVLNPYVK	1
		YATALYSAASK	1
ATP6V0A1	5	ASLYPCPETPQER	1
		DLNPDVNVFQR	1
		EMASGVNTR	1
		LGFVAGVINR	1
		NFLELTELK	1
ATP6V0D1	2	LLFEGAGSNPGDK	1
		LYPEGLAQLAR	1
ATP6V1A	10	DFPELTMEVDGK	1
		EASIYTGITLSEYFR	1
		FTMVQVWPVR	1
		GNEMSEVLR	1
		GVNVSALSR	1
		LAEMPADSGYPAYLGAR	1
		LPANHPLLTGQR	1
		TALVANTSNMPVAAR	1
		TVISQSLSK	1
		VGHSELVGEIIR	1
ATP6V1B2	6	AVVGEEALTSDDLLYLEFLQK	1
		AVVQVFEGTSGIDAK	1
		IPQSTLSEFYPR	1
		NFIAQGPYENR	1
		SGQVLEVSGSK	1
		TSCEFTGDILR	1
ATP6V1C1	3	GVTQIDNDLK	1
		QYETLAEMVVPR	1
		TEFWLISAPGEK	1
ATP6V1D	2	AVELLVELASLQTSFVTLDEAIK	1
		EAAFSLAEAK	1
ATP6V1E1	6	ARDDLITDLLNEAK	1
		DDLITDLLNEAK	1
		GALFGANANR	1
		IQMSNLMNQAR	1
		LDLIAQQMMPEVR	1
		YQVLLDGLVLQGLYQLLEPR	1
ATP6V1F	2	DTTINEIEDTFR	1
		GMFTAEDLR	1
ATP6V1G1	1	MTILQTYFR	1
ATP6V1H	3	GAVDAAVPTNIIAAK	1
		QLQSEQPQTAAAR	1
		YNALLAVQK	1
ATP9A	4	LPTAADLLQIR	1
		SSTIPEQLGR	1
		TDNIPLQPVR	1
		VPADMIFLR	1
ATPAF1	1	AQSCPTFLCALPR	1
ATRIP	1	LSDGDMTSALR	1
ATRN	2	LTGSSGFVTDGPGNYK	1
		SEAACLAAGPGIR	1
ATXN10	5	AAPRPPPAR	1
		LSGVMVPAPIQDLEALR	1
		NACIECSVNQNSIR	1
		NLTEDNSQNQDLIAK	1
		VEQESLLTAFR	1
ATXN2	1	DAFTDSAISAK	1
ATXN2L	8	EIESSPQYR	1
		FNEENYGVK	1
		ISLAPTDVK	1
		NVDFNYATK	1
		STSTPTSPGPR	1
		TLEPQELAR	1
		TTYDSSLSSYTVPLEK	1
		VPGLQNEQK	1
ATXN3	2	AIQLSMQGSSR	1
		LIGEELAQLK	1
AUH	1	LAIIPGGGGTQR	1
AUP1	1	GTQSLPTASASK	1
AUTS2	1	GASLGPPPYLR	1
AVL9	4	AVGQSVGGAFSSAK	1
		EQLGSDQTNLFPK	1
		IGNVMVTTSR	1
		LLNPTTADLR	1
AXL	1	TATITVLPQQPR	1
AZGP1	5	AGEVQEPELR	1
		AYLEEECPATLR	1
		EDIFMETLK	1
		EIPAWVPFDPAAQITK	1
		QDPPSVVVTSHQAPGEK	1
AZU1	2	CQVAGWGSQR	1
		QFPFLASIQNQGR	1
B2M	2	VEHSDLSFSK	1
		VNHVTLSQPK	1
B3GNT3	1	LSSFDPCFYR	1
B3GNT7	1	TLFLLGTASK	1
BABAM1	3	AVGAQASVGSR	1
		SWQVPPPAPEVQIR	1
		TELPVTENVQTIPPPYVVR	1
BABAM2	3	ISPMLSPFISSVVR	1
		MSPEVALNR	1
		VGLDATNCLR	1
BAD	1	GLGPSPAGDGPSGSGK	1
BAG2	7	EAATAVEQEK	1
		EELNLTANR	1
		FLDDLGNAK	1
		LLESLDQLELR	1
		NPQQQESLK	1
		QISDGEREELNLTANR	1
		TLQQNAESR	1
BAG3	2	FRTEAAAAAPQR	1
		TEAAAAAPQR	1
BAG4	1	SSGNSPTPVSR	1
BAG6	7	AGSSESIAAFIQR	1
		DLEAPEVQESYR	1
		ENASPAPGTTAEEAMSR	1
		ESFSLVQVQPGVDIIR	1
		LINLVGESLR	1
		LQEDPNYSPQR	1
		LQEYNVGGK	1
BAIAP2	6	AFPAQTASGFK	1
		ALAGVTYAAK	1
		LSDSYSNTLPVR	1
		SLSPPQSQSK	1
		SSSMAAGLER	1
		TIMEQFNPSLR	1
BAIAP2L1	5	AYTSPLIDMFNNPATAAPNSQR	1
		IMNMIEEIK	1
		LLEENETEAVTVPTPSPTPVR	1
		NVMEQFNPGLR	1
		VNNSTGTSEDPSLQR	1
BAIAP2L2	1	APSPAPPPLPSSR	1
BAK1	1	ASGQGPGPPR	1
BANF1	1	DFVAEPMGEKPVGSLAGIGEVLGK	1
BAP18	1	VGEIFSAAGAAFTK	1
BASP1	6	AEGAATEEEGTPK	1
		AEPPKAPEQEQAAPGPAAGGEAPK	1
		AQGPAASAEEPKPVEAPAANSDQTVTVK	1
		ESEPQAAAEPAEAK	1
		ETPAATEAPSSTPK	1
		KTEAPAAPAAQETK	1
BAX	5	GGGPTSSEQIMK	1
		IGDELDSNMELQR	1
		MGGEAPELALDPVPQDASTK	1
		MIAAVDTDSPR	1
		TGALLLQGFIQDR	1
BAZ1B	3	IISNVPADSLIR	1
		QVFTNAEVYNCR	1
		SDLIEVATR	1
BBS7	1	SAVPSFGINDK	1
BCAM	5	AGAAGTAEATAR	1
		GDGSPSPEYTLFR	1
		LSVPPLVEVMR	1
		SPPYQLDSQGR	1
		VAYLDPLELSEGK	1
BCAP31	4	AENQVLAMR	1
		LDVGNAEVK	1
		LKDELASTK	1
		LQAAVDGPMDK	1
BCAS1	6	ANFTSQETQGAGK	1
		DPTLLPPETGGAGGEAPSKPK	1
		SGPTSLPLGK	1
		TGDQAADSSLGSVK	1
		TITPPEPEPTGAPQK	1
		VDEVPGLSGQSDDVPAGK	1
BCAS2	2	TIVQLENEIYQIK	1
		YELPAPSSGQK	1
BCAT1	1	DLIVTPATILK	1
BCAT2	2	AAAALGQIWAR	1
		EVFGSGTACQVCPVHR	1
BCCIP	2	AVESGVPQPPDPPVQR	1
		TVMLIPGDK	1
BCKDHA	3	GPGYGIMSIR	1
		SMTLLNTMDR	1
		VDGNDVFAVYNATK	1
BCKDK	1	YLQQELPVR	1
BCL10	1	GLDTLVESIR	1
BCL2L1	2	ELVVDFLSYK	1
		EVIPMAAVK	1
BCL2L13	2	ASSSTVPLGFHYETK	1
		ILVPLVLLR	1
BCL7C	1	DPGGITAGSTDEPPMLTK	1
BCLAF1	5	IDISPSTLR	1
		LLASTLVHSVK	1
		MAPVPLDDSNRPASLTK	1
		SAAMTLNER	1
		TIAPQNAPR	1
BCR	1	VSGVATDIQALK	1
BDH1	1	VVNISSMLGR	1
BDH2	4	QIDQFANEVER	1
		SGNIINMSSVASSVK	1
		SVAADFIQQGIR	1
		VIATDINESK	1
BGN	6	EISPDTTLLDLQNNDISELR	1
		IQAIELEDLLR	1
		LAIQFGNYK	1
		VGVNDFCPMGFGVK	1
		VPSGLPDLK	1
		VVQCSDLGLK	1
BICD2	2	EINQNVEIQR	1
		LTENLSALR	1
BID	1	IEADSESQEDIIR	1
BIN1	5	GVFPENFTER	1
		GVFPENFTERVP	1
		LDLPPGFMFK	1
		SPSPPDGSPAATPEIR	1
		VNHEPEPAGGATPGATLPK	1
BIN2	2	SLVISPPVR	1
		TSAPPSRPPPPR	1
BIN3	1	LQQLEEQTR	1
BIRC6	3	LLDYVATVEDEAAAAK	1
		TCVDTYTNR	1
		VLDTSDALK	1
BLMH	1	IGPITPLEFYR	1
BLOC1S2	1	AAAAEGVLATR	1
BLOC1S3	1	DLPPLVVQR	1
BLOC1S5	2	DSLSQVLQR	1
		LQAANDSVCR	1
BLVRA	3	FGFPAFSGISR	1
		GSLLFTAGPLEEER	1
		SGSLENVPNVGVNK	1
BLVRB	3	LQAVTDDHIR	1
		NDLSPTTVMSEGAR	1
		TVAGQDAVIVLLGTR	1
BMP2K	1	ITDTIGPTETSIAPR	1
BNIP1	1	AAPQDVHVR	1
BOD1	1	AAVPAPPPEPEGQDPPAPSQDTS	1
BOLA1	1	FEGLSPLQR	1
BOLA2	4	DLEAEHVEVEDTTLNR	1
		FEGKPLLQR	1
		MELSAEYLR	1
		TLTPDQWAR	1
BOP1	3	LTDEQVALVR	1
		TAAPSVRPEK	1
		TVQDPMTGR	1
BORCS5	1	LQEIPTFQPLLK	1
BORCS6	1	TSSEPPAGLR	1
BORCS7	1	SSELLGQAAR	1
BPGM	1	VCDVPLDQLPR	1
BPI	1	GFPLPTPAR	1
BPNT1	6	ASSNTVLMR	1
		LAQMSICSSLAR	1
		LVASAYSIAQK	1
		LVTDCVAAMNPDAVLR	1
		TCATDLQTK	1
		VIAEGDLGIVEK	1
BPNT2	1	MTSGDVLSNR	1
BPTF	2	FCLTPAGEFK	1
		VVSGNVEPK	1
BRAT1	1	GSPNTASAEATLPR	1
BRCC3	2	FAYTGTEMR	1
		VEISPEQLSAASTEAER	1
BRD1	1	LTPLTVLLR	1
BRD3	2	ADTTTPTTSAITASR	1
		LQDVSGQLSSSK	1
BRD4	2	AASVVQPQPLVVVK	1
		VQPPTPLLPSVK	1
BRD8	1	SGVAEAPVGSK	1
BRK1	1	AGQEDPVQR	1
BROX	1	IPTEAPQLELK	1
BSG	4	FFVSSSQGR	1
		GGVVLKEDALPGQK	1
		GSDQAIITLR	1
		SESVPPVTDWAWYK	1
BSPRY	2	LQLQSAAITK	1
		YVADVLPGK	1
BST1	3	FMPLSDVLYGR	1
		GFFADYEIPNLQK	1
		VADFLSWCR	1
BST2	2	ASTSYDYCR	1
		LQDASAEVER	1
BTD	2	GDMFLVANLGTK	1
		VDLITFDTPFAGR	1
BTF3	1	GGCPGGEATLSQPPPR	1
BUB3	6	LNQPPEDGISSVK	1
		LYDVPANSMR	1
		QGYVLSSIEGR	1
		TPCNAGTFSQPEK	1
		VAVEYLDPSPEVQK	1
		VYTLSVSGDR	1
BUD13	3	TGLVLTDIQR	1
		TLGSSDTQQLR	1
		YSGPAPPPNR	1
BUD31	1	DTNFGTNCICR	1
BYSL	1	TLADIIMEK	1
BZW1	2	DINAVAASLR	1
		LMELFPANK	1
BZW2	1	LLELFPVNR	1
C11orf54	2	APLVCLPVFVSR	1
		TGPLNFVTCMR	1
C11orf68	2	LGVLEADSAIR	1
		TTPATELDAWLAK	1
C11orf96	1	STQSLSLQR	1
C12orf57	2	ASASTQPAALSAEQAK	1
		SYEAQDPEIASLSGK	1
C19orf25	1	LQQAGNVLR	1
C1QA	1	SLGFCDTTNK	1
C1QB	2	GNLCVNLMR	1
		LEQGENVFLQATDK	1
C1QBP	4	AFVDFLSDEIK	1
		AFVDFLSDEIKEER	1
		EVSFQSTGESEWK	1
		VEEQEPELTSTPNFVVEVIK	1
C1QC	3	FQSVFTVTR	1
		QTHQPPAPNSLIR	1
		TNQVNSGGVLLR	1
C1QTNF5	1	VPPPSDAPLPFDR	1
C1R	3	LPVANPQACENWLR	1
		VLNYVDWIK	1
		YTTTMGVNTYK	1
C1RL	1	GSEAINAPGDNPAK	1
C1S	5	CVPVCGVPR	1
		EPTMYVGSTSVQTSR	1
		IIGGSDADIK	1
		TNFDNDIALVR	1
		YHGDPMPCPK	1
C1orf198	4	ASMAAAIAASR	1
		FAQVSSSNVVLK	1
		LPPAQQDEIIDR	1
		SSSLDALGPTR	1
C1orf226	1	SVLQETFPR	1
C2	3	AVISPGFDVFAK	1
		SSGQWQTPGATR	1
		VLMSVLNDNSR	1
C2CD5	1	ASDLTDAFVEVK	1
C2orf49	1	SPPLSPVGTTPVK	1
C2orf72	1	AAGAAGAAAAAAR	1
C3	41	ACEPGVDYVYK	1
		ADIGCTPGSGK	1
		AELQCPQPAAR	1
		AGDFLEANYMNLQR	1
		AYYENSPQQVFSTEFEVK	1
		CAEENCFIQK	1
		DFDFVPPVVR	1
		DICEEQVNSLPGSITK	1
		DSCVGSLVVK	1
		DYAGVFSDAGLTFTSSSGQQTAQR	1
		EGVQKEDIPPADLSDQVPDTESETR	1
		EVVADSVWVDVK	1
		FISLGEACK	1
		GYTQQLAFR	1
		IHWESASLLR	1
		ILLQGTPVAQMTEDAVDAER	1
		IPIEDGSGEVVLSR	1
		ISLPESLKR	1
		KQELSEAEQATR	1
		KVLLDGVQNPR	1
		LVAYYTLIGASGQR	1
		NTMILEICTR	1
		QELSEAEQATR	1
		QPSSAFAAFVK	1
		QPVPGQQMTLK	1
		RIPIEDGSGEVVLSR	1
		SDDKVTLEER	1
		SGIPIVTSPYQIHFTK	1
		SGSDEVQVGQQR	1
		SNLDEDIIAEENIVSR	1
		SSLSVPYVIVPLK	1
		TELRPGETLNVNFLLR	1
		TGLQEVEVK	1
		TIYTPGSTVLYR	1
		TVMVNIENPEGIPVK	1
		VELLHNPAFCSLATTK	1
		VFLDCCNYITELR	1
		VLLDGVQNPR	1
		VPVAVQGEDTVQSLTQGDGVAK	1
		VTIKPAPETEK	1
		YYTYLIMNK	1
C4B	1	AEMADQAAAWLTR	1
C4BPA	8	EDVYVVGTVLR	1
		FSAICQGDGTWSPR	1
		GSSVIHCDADSK	1
		GYILVGQAK	1
		LMQCLPNPEDVK	1
		LSLEIEQLELQR	1
		TPSCGDICNFPPK	1
		YTCLPGYVR	1
C4BPB	1	ALLAFQESK	1
C5	2	DINYVNPVIK	1
		LQGTLPVEAR	1
C5AR1	1	NVLTEESVVR	1
C6	4	GEVLDNSFTGGICK	1
		GFVVAGPSR	1
		IGESIELTCPK	1
		TLNICEVGTIR	1
C6orf132	2	TSSIPVQEAQEAPR	1
		YAGAGGLER	1
C6orf89	1	LSETVDLVR	1
C7	3	AASGTQNNVLR	1
		GCPTEEGCGER	1
		GQSISVTSIRPCAAETQ	1
C8A	4	ALDQYLMEFNACR	1
		AMAVEDIISR	1
		LGSLGAACEQTQTEGAK	1
		MESLGITSR	1
C8B	2	CEGFVCAQTGR	1
		LPLEYSYGEYR	1
C8G	1	SLPVSDSVLSGFEQR	1
C8orf33	2	AAAYSAQVQPVDGATR	1
		AALGHLAGEAAAAPGPGTPCASR	1
C8orf82	2	LSYCGGGEALAVPFEPAR	1
		YEAAFPFLSPCGR	1
C9	4	AIEDYINEFSVR	1
		DGNTLTYYR	1
		LSPIYNLVPVK	1
		VVEESELAR	1
CA1	4	ADGLAVIGVLMK	1
		GGPFSDSYR	1
		VLDALQAIK	1
		YSSLAEAASK	1
CA13	1	ITDTLDSIK	1
CA2	6	EPISVSSEQVLK	1
		GGPLDGTYR	1
		QSPVDIDTHTAK	1
		SADFTNFDPR	1
		VVDVLDSIK	1
		YDPSLKPLSVSYDQATSLR	1
CA4	2	ASISGGGLPAPYQAK	1
		QSPINIVTTK	1
CA9	3	GGVSYRPAEVAETGA	1
		VIEASFPAGVDSSPR	1
		YGGDPPWPR	1
CAB39	2	DVAQIFNNILR	1
		TQPILDILLK	1
CAB39L	1	GYEAPQIALR	1
CACNA2D1	6	FFGEIDPSLMR	1
		FVVTDGGITR	1
		LEETITQAR	1
		TPNNPSCNADLINR	1
		YQDLYTVEPNNAR	1
		YYPASPWVDNSR	1
CACTIN	1	AAAAALSQQQSLQER	1
CACUL1	1	ELQASPPDLYIER	1
CACYBP	1	TDTVLILCR	1
CAD	15	AALVLEDGSVLR	1
		ATGYPLAYVAAK	1
		EATAGNPGGQTVR	1
		FLSSAAAVSK	1
		GIPGLPDGR	1
		GQPLPPDLLQQAK	1
		ILALDCGLK	1
		LSLDDLLQR	1
		MALLATVLGR	1
		SILEQLAEK	1
		SVGEVMGIGR	1
[truncated: 14,889 more rows]

## Sheet: DirectDIA Spectronaut
Gene	Number of Unique Peptides Quantified	Peptide Sequence	Proteotypicity
A1BG	5	ATWSGAVLAGR	1
		CEGPIPDVTFELLR	1
		CLAPLEGAR	1
		SGLSTGWTQLSK	1
		VTLTCVAPLSGVDFQLR	1
A2M	15	AIGYLNTGYQR	1
		FEVQVTVPK	1
		LLIYAVLPTGDVIGDSAK	1
		LLLQQVSLPELPGEYSMK	1
		LPPNVVEESAR	1
		NEDSLVFVQTDK	1
		QFSFPLSSEPFQGSYK	1
		QGIPFFGQVR	1
		QTVSWAVTPK	1
		SASNMAIVDVK	1
		TEHPFTVEEFVLPK	1
		VGFYESDVMGR	1
		VSVQLEASPAFLAVPVEK	1
		VTAAPQSVCALR	1
		YDVENCLANK	1
AAMDC	7	ETGTEHSPGVQPADVK	1
		EYNALVAQGVR	1
		GVQTLVIGR	1
		TSPEIASLSWGQMK	1
		VGGVFHSTC	1
		VLQTEQAVK	1
		VPSSTVEYLK	1
AAMP	2	AVVGYEDGTIR	1
		TFQGPNCPATCGR	1
AARS1	8	AVFDETYPDPVR	1
		AVYTQDCPLAAAK	1
		GAMSTQQIK	1
		GLEVTDDSPK	1
		IVAVTGAEAQK	1
		MDSTLTASEIR	1
		SIDTGMGLER	1
		VGAEDADGIDMAYR	1
ABCB1	2	TVVSLTQEQK	1
		VVSQEEIVR	1
ABCD3	2	DQVIYPDGR	1
		IANPDQLLTQDVEK	1
ABCE1	6	GSELQNYFTK	1
		GTVGSILDR	1
		NTVANSPQTLLAGMNK	1
		NVEDLSGGELQR	1
		VAETANEEEVK	1
		VIVFDGVPSK	1
ABCF1	5	AVSEEQQPALK	1
		EVLEALGEVMVSRPR	1
		LQGQLEQGDDTAAER	1
		MEETPTEYLQR	1
		VVFAELACR	1
ABHD11	1	AINIADELPR	1
ABHD14B	5	AVAIDLPGLGHSK	1
		EALPGSGQAR	1
		FSSETWQNLGTLHR	1
		FSVLLLHGIR	1
		INAANYASVK	1
ABI1	1	ALIESYQNLTR	1
ABI3BP	3	DNVEGGIWSK	1
		TGQQLTSDQLPIK	1
		VSEPVSAGR	1
ABLIM1	1	TLSPTPSAEGYQDVR	1
ABRACL	1	MNVDHEVNLLVEEIHR	1
ABRAXAS2	1	NTQQQMSYR	1
ACAA1	1	GNPGNITSR	1
ACAA2	3	DFTATDLSEFAAK	1
		ETPALTINR	1
		TPFGAYGGLLK	1
ACAD10	1	GGLVISPESLSPPVR	1
ACAD8	2	ELFPVDVMR	1
		NAAVALQEER	1
ACADM	3	EEIIPVAAEYDK	1
		NTYYASIAK	1
		TGEYPVPLIR	1
ACADS	3	IAMQTLDMGR	1
		ITEIYEGTSEIQR	1
		MAFGAPLTK	1
ACADVL	5	GGVVTSNPLGF	1
		IFEGTNDILR	1
		TPVTDPATGAVK	1
		TSAVPSPCGK	1
		VPSENVLGEVGSGFK	1
ACAT1	6	EAYMGNVLQGGEGQAPTR	1
		EVVIVSATR	1
		FGNEVIPVTVTVK	1
		GSTPYGGVK	1
		NEQDAYAINSYTR	1
		TPIGSFLGSLSLLPATK	1
ACAT2	3	EIVPVLVSTR	1
		ILVTLLHTLER	1
		MNAGSDPVVIVSAAR	1
ACBD3	3	GPGASGEQPEPGEAAAGGAAEEAR	1
		IQQDADSVITVGR	1
		QQEVVVAGSSLPTSSK	1
ACIN1	7	ASLVALPEQTASEEETPPPLLTK	1
		GVPAGNSDTEGGQPGR	1
		SQEQEVLER	1
		STLADYSAQK	1
		TTSPLEEEER	1
		VTLGDTLTR	1
		WGASTATTQK	1
ACLY	11	AIVWGMQTR	1
		EAYPEEAYIADLDAK	1
		FGGALDAAAK	1
		FICTTSAIQNR	1
		GGPNYQEGLR	1
		IGNTGGMLDNILASK	1
		LGQEATVGK	1
		SGGMSNELNNIISR	1
		TIAIIAEGIPEALTR	1
		TTDGVYEGVAIGGDR	1
		VTPDTDWAR	1
ACO1	7	AVLAESYER	1
		IIPPGSGIIHQVNLEYLAR	1
		NIEVPFKPAR	1
		QYVIPGMFK	1
		SNPFAHLAEPLDPVQPGK	1
		VILQDFTGVPAVVDFAAMR	1
		YQQAGLPLIVLAGK	1
ACO2	6	LEAPDADELPK	1
		LTGSLSGWSSPK	1
		NAVTQEFGPVPDTAR	1
		NTIVTSYNR	1
		SQFTITPGSEQIR	1
		WVVIGDENYGEGSSR	1
ACOT11	1	GELSVGQLLK	1
ACOT13	2	ITLVSAAPGK	1
		TLAFTSVDLTNK	1
ACOT7	3	LMDEVAGIVAAR	1
		MIEEAGAIISTR	1
		VLEVPPVVYSR	1
ACOT9	2	IAFSSTSLLK	1
		YLTVQNTVR	1
ACP1	4	IELLGSYDPQK	1
		LVTDQNISENWR	1
		SPIAEAVFR	1
		VDSAATSGYEIGNPPDYR	1
ACSF3	1	LPGSVGTPLPGVQVR	1
ACSL1	2	IGFFQGDIR	1
		VLQPTVFPVVPR	1
ACSL5	6	ALVLIGNVEK	1
		EAILEDLQK	1
		GLAVSDNGPCLGYR	1
		GSFEELCQNQVVR	1
		IVQAVVYSCGAR	1
		TLKPTLFPAVPR	1
ACSS1	3	EPAAFWGPLAR	1
		INQFYGAPTAVR	1
		TEGGYYQITGR	1
ACSS2	2	FYTAPTAIR	1
		GATTNICYNVLDR	1
ACTB	2	DDDIAALVVDNGSGMCK	1
		DDDIAALVVDNGSGMCKAGFAGDDAPR	1
ACTBL2	2	DLYANTVLSGGSTMYPGIADR	1
		VAPDEHPILLTEAPLNPK	1
ACTG1	1	EEEIAALVIDNGSGMCK	1
ACTL6A	5	ENMEAISPLK	1
		LIANNTTVER	1
		QGGPTYYIDTNALR	1
		SPLAGDFITMQCR	1
		VDFPTAIGMVVER	1
ACTN1	11	ATLPDADKER	1
		DDPLTNLNTAFDVAEK	1
		DYETATLSEIK	1
		ETADTDTADQVMASFK	1
		GISQEQMNEFR	1
		ICDQWDNLGALTQK	1
		IMSIVDPNR	1
		LAILGIHNEVSK	1
		LSNRPAFMPSEGR	1
		MLDAEDIVGTARPDEK	1
		NYITMDELR	1
ACTN2	2	GITQEQMNEFR	1
		ISNRPAFMPSEGK	1
ACTN4	16	ACLISLGYDVENDR	1
		DDPVTNLNNAFEVAEK	1
		DYETATLSDIK	1
		ETTDTDTADQVIASFK	1
		GISQEQMQEFR	1
		KDDPVTNLNNAFEVAEK	1
		LSGSNPYTTVTPQIINSK	1
		LSNRPAFMPSEGK	1
		MAPYQGPDAVPGALDYK	1
		MLDAEDIVNTARPDEK	1
		NFITAEELR	1
		QFASQANVVGPWIQTK	1
		SFSTALYGESDL	1
		STLPDADRER	1
		VLAGDKNFITAEELR	1
		VLAVNQENEHLMEDYEK	1
ACTR2	4	DLMVGDEASELR	1
		GYAFNHSADFETVR	1
		ILLTEPPMNPTK	1
		LCYVGYNIEQEQK	1
ACTR3	5	DYEEIGPSICR	1
		LPACVVDCGTGYTK	1
		NIVLSGGSTMFR	1
		QYTGINAISK	1
		YSYVCPDLVK	1
ACY1	7	AVGVPALGFSPMNR	1
		CVSIQYLEAVR	1
		DSEGYIYAR	1
		EGSVTSVNLTK	1
		FMEDTAAEK	1
		LLPALASVPALPSDS	1
		VVNSILAFR	1
ADAR	5	AMTILLEEAK	1
		DINAVLIDMER	1
		MGFTEVTPVTGASLR	1
		TAESQTPTPSATSFFSGK	1
		YLNTNPVGGLLEYAR	1
ADD1	6	AAVVTSPPPTTAPHK	1
		GSEENLDEAR	1
		SLVQGELVTASK	1
		SPGSPVGEGTGSPPK	1
		TSTSAVPNLFVPLNTNPK	1
		VDENNPEYLR	1
ADD3	4	GLSFSEATASNLVK	1
		INENDPEYIR	1
		VGEIEFEGLMR	1
		VTQILQSPAFR	1
ADH1C	1	INEGFDLLR	1
ADH5	2	GLMPDGTSR	1
		IDPLAPLDK	1
ADIRF	1	TANQASDTFSGIGK	1
ADK	1	AAAEEEPKPK	1
ADNP	2	SLPSQQMVNR	1
		SPSLSQSQASR	1
ADPGK	1	VAGTQACATETIDTSR	1
ADPRS	1	TEALYYTDDTAMAR	1
ADRM1	2	SQSAAVTPSSTTSSTR	1
		TTSGALFPSLVPGSR	1
ADSL	3	AFIITGQTYTR	1
		NALDLLLPK	1
		VLSQQAASVVK	1
ADSS2	4	ELPVNAQNYVR	1
		FIEDELQIPVK	1
		TLPGWNTDISNAR	1
		VGIGAFPTEQDNEIGELLQTR	1
AEBP1	5	APAPAPEER	1
		LVSYPYDMAR	1
		TPTQEQLLAAAMAAAR	1
		VVNEECPTITR	1
		YLSPDATVSTEVR	1
AFDN	2	SVTPASTLTK	1
		TPAAIPATPVAVSQPIR	1
AFG2B	1	GVLLAGPPGVGK	1
AFG3L2	3	ITTGAQDDLR	1
		VGQISFDLPR	1
		VSEEIFFGR	1
AGA	1	FLPSYQAVEYMR	1
AGAP3	1	ATPATAPGTSPR	1
AGFG1	1	GTPSQSPVVGR	1
AGMAT	2	GSSTTLDPYR	1
		SLVPLMGEVR	1
AGR2	2	HLSPDGQYVPR	1
		LYAYEPADTALLLDNMK	1
AGR3	3	DLPLLIENMK	1
		NLSPDGQYVPR	1
		VFAQNEEIQEMAQNK	1
AGT	4	ALQDQLVLVAAK	1
		DPTFIPAPIQAK	1
		SLDFTELDVAAEK	1
		VLSALQAVQGLLVAQGR	1
AHCY	9	AGIPVYAWK	1
		ALDIAENEMPGLMR	1
		ATDVMIAGK	1
		GISEETTTGVHNLYK	1
		VADIGLAAWGR	1
		VAVVAGYGDVGK	1
		VPAINVNDSVTK	1
		WLNENAVEK	1
		YPQLLPGIR	1
AHCYL1	2	SMPDAMPLPGVGEELK	1
		TTDVMFGGK	1
AHNAK	81	ADIEISGPK	1
		ADLGVSGPK	1
		ADVDISGPK	1
		ADVDVSGPK	1
		ADVVVSGPK	1
		AEAPLPSPK	1
		AEGPDVAVDLPK	1
		AEGPEVDVNLPK	1
		AGAISASGPELQGAGHSK	1
		ANVDISAPK	1
		DDGVFVQEVTQNSPAAR	1
		DIDISSPEFK	1
		ELLLPNWQGSGSHGLTIAQR	1
		GDFDVSVPK	1
		GDISISGPK	1
		GDLDASVPSMK	1
		GDMDVSLPK	1
		GDMDVSVPK	1
		GDVDISLPK	1
		GDVDVSLPK	1
		GDVDVSVPK	1
		GDVDVTGPK	1
		GDVDVTLPK	1
		GEGPDVDVNLPK	1
		GEGPDVDVSLPK	1
		GEGPDVDVTLPK	1
		GEGPEFDVNLSK	1
		GEGPEVDMNLPK	1
		GEGPEVDVNLPK	1
		GEGPEVDVTLPK	1
		GGVDVTLPR	1
		GGVQVPAVDISSSLGGR	1
		GGVTGSPEASISGSK	1
		GPEVDVSGPK	1
		GPGVDLPSVNLSMPK	1
		GPGVDVNLK	1
		GPQVSGELK	1
		GPQVSSALNLDTSK	1
		GSEVGFHGAAPDISVK	1
		IDVTAPDVSIEEPEGK	1
		IEGEMQVPDVDIR	1
		ISAPNVDFNLEGPK	1
		ISMPDVDFNLK	1
		ISMPDVDLHLK	1
		ISMQDVDLSLGSPK	1
		ISMSEVDLNVAAPK	1
		LDFEGPDAK	1
		LEGPDVSLK	1
		LEVPDMNIR	1
		LNVGAPDVTLR	1
		LPSGSGAASPTGSAVDIR	1
		LPTGQISGPEIK	1
		LQVTMPGIK	1
		MDAEVPDVNIEGPDAK	1
		MPDVDISVPK	1
		MPFLSISSPK	1
		MPSLEISAPK	1
		MPTFSTPGAK	1
		MQVGGDGVK	1
		SSGCDVNLPGVNVK	1
		TDVDVSLPK	1
		VDIDVPDVNIEGPDAK	1
		VDIDVPDVNIEGPEGK	1
		VDIDVPDVNLEAPEGK	1
		VDIEGPDVNIEGPEGK	1
		VDIETPNLEGTLTGPR	1
		VDINAPDVDVR	1
		VDINAPDVEVQGK	1
		VDTNAPDLSLEGPEGK	1
		VDVDVPDVNIEGPDAK	1
		VDVECPDVNIEGPEGK	1
		VDVEVPDVSLEGPEGK	1
		VGGSGVNVNAK	1
		VGVEVPDVNIEGPEGK	1
		VKGDVDVSLPK	1
		VNVEAPDVNLEGLGGK	1
		VPGIDATTK	1
		VSAPGVQGDVK	1
		VSGPDLDLNLK	1
		VSMPDVELNLK	1
		VTAYTVDVTGR	1
AHSA1	3	EAMGIYISTLK	1
		ETFLTSPEELYR	1
		GIPAPEEER	1
AHSG	5	AQLVPLPPSTYVEFTVSGTDCVAK	1
		CDSSPDSAEDVR	1
		EHAVEGDCDFQLLK	1
		HTLNQIDEVK	1
		TVVQPSVGAAAGPVVPPCPGR	1
AIDA	1	LPSEPGMTLLTIR	1
AIFM1	3	ALGTEVIQLFPEK	1
		ISGLGLTPEQK	1
		SATEQSGTGIR	1
AIFM3	1	VAEVLASGR	1
AIMP1	4	AQTMSNSGIK	1
		GAEADQIIEYLK	1
		QQSIAGSADSKPIDVSR	1
		TVVSGLVNHVPLEQMQNR	1
AIMP2	3	FLFSLFGQK	1
		SCENLAPFNTALK	1
		VELPTCMYR	1
AIP	1	VLELDPALAPVVSR	1
AK1	4	ATEPVIAFYEK	1
		EVQQGEEFER	1
		IIFVVGGPGSGK	1
		VDDNEETIK	1
AK2	4	AMVASGSELGK	1
		APSVPAAEPEYPK	1
		AVLLGPPGAGK	1
		LQAYHTQTTPLIEYYR	1
AK3	6	AVIMGAPGSGK	1
		GTEIGVLAK	1
		LIPDDVMTR	1
		TLPQAEALDR	1
		TVGIDDLTGEPLIQR	1
		VYNIEFNPPK	1
AK4	4	ASTEVGEMAK	1
		AVILGPPGSGK	1
		LMMSELENR	1
		SLLVPDHVITR	1
AKAP12	8	AITPQAQEELQK	1
		EGVTPWASFK	1
		EVIAEEEPPTVTEPLPENR	1
		SAESPTSPVTSETGSTFK	1
		STPVIVSATTK	1
		SVPEDDGHALLAER	1
		TQEVLQAVAEK	1
		VVGQTTPESFEK	1
AKAP9	1	VTEEGTELSQR	1
AKR1A1	6	AASCVLLHTGQK	1
		DAGHPLYPFNDPY	1
		GLEVTAYSPLGSSDR	1
		GLVQALGLSNFNSR	1
		VFDFTFSPEEMK	1
		YIVPMLTVDGK	1
AKR1B1	2	MPILGLGTWK	1
		SPPGQVTEAVK	1
AKR7A2	3	ALQAAYGASAPSVTSAALR	1
		MDAPASAAAVR	1
		VASVLGTMEMGR	1
AKR7A3	2	AIPLFGNSLKPDSLR	1
		ALQAAYGASAPSMTSATLR	1
ALAD	5	AAVLEAMTAFR	1
		CVLIFGVPSR	1
		GSAADSEESPAIEAIHLLR	1
		LAEVALAYAK	1
		LEEMLRPLVEEGLR	1
ALB	30	AAFTECCQAADK	1
		ADDKETCFAEEGK	1
		AEFAEVSKLVTDLTK	1
		ALVLIAFAQYLQQCPFEDHVK	1
		AVMDDFAAFVEK	1
		CCAAADPHECYAK	1
		CCTESLVNR	1
		DVFLGMFLYEYAR	1
		ECCEKPLLEK	1
		EFNAETFTFHADICTLSEK	1
		ETCFAEEGK	1
		ETYGEMADCCAK	1
		HPYFYAPELLFFAK	1
		KLVAASQAALGL	1
		KQTALVELVK	1
		KVPQVSTPTLVEVSR	1
		LDELRDEGK	1
		LVAASQAALGL	1
		LVNEVTEFAK	1
		MPCAEDYLSVVLNQLCVLHEK	1
		QNCELFEQLGEYK	1
		QTALVELVK	1
		RPCFSALEVDETYVPK	1
		SHCIAEVENDEMPADLPSLAADFVESK	1
		SLHTLFGDK	1
		TCVADESAENCDK	1
		VFDEFKPLVEEPQNLIK	1
		VPQVSTPTLVEVSR	1
		VTKCCTESLVNR	1
		YICENQDSISSK	1
ALDH16A1	2	GAAACDLVQR	1
		GLDGAVDMGAR	1
ALDH18A1	4	EMAIPVLEAR	1
		GPVGLEGLLTTK	1
		MLATLEPEQR	1
		QIAASSQDSVGR	1
ALDH1A1	9	ANNTFYGLSAGVFTK	1
		EEIFGPVQQIMK	1
		GYFVQPTVFSNVTDEMR	1
		IFVEESIYDEFVR	1
		ILDLIESGK	1
		QAFQIGSPWR	1
		SSSGTPDLPVLLTDLK	1
		TIPIDGNFFTYTR	1
		VAFTGSTEVGK	1
ALDH1A3	2	FATCNPSTR	1
		TEQGPQIDQK	1
ALDH1B1	8	EEIFGPVQPLFK	1
		LAPALATGNTVVMK	1
		TFPTVNPTTGEVIGHVAEGDR	1
		TIPMDGQHFCFTR	1
		VAEQTPLSALYLASLIK	1
		VAFTGSTEVGHLIQK	1
		VLGYIQLGQK	1
		YGLAAAVFTR	1
ALDH2	14	AAFQLGSPWR	1
		ANNSTYGLAAAVFTK	1
		EEIFGPVMQILK	1
		ELGEYGLQAYTEVK	1
		LGPALATGNVVVMK	1
		LLCGGGIAADR	1
		TEQGPQVDETQFK	1
		TFVQEDIYDEFVER	1
		TIPIDGDFFSYTR	1
		VAEQTPLTALYVANLIK	1
		VAFTGSTEIGR	1
		VIQVAAGSSNLK	1
		VIQVAAGSSNLKR	1
		VVGNPFDSK	1
ALDH3A2	1	IAFGGETDEATR	1
ALDH4A1	8	AADMLSGPR	1
		AIEAALAAR	1
		NAAGNFYINDK	1
		SADVESVVSGTLR	1
		SAFEYGGQK	1
		SSPSLTILAGGK	1
		STGSIVGQQPFGGAR	1
		VANEPVLAFTQGSPER	1
ALDH5A1	1	LAGLSAALLR	1
ALDH6A1	3	AFPAWADTSVLSR	1
		TLADAEGDVFR	1
		VCNLIDSGTK	1
ALDH7A1	11	DLPLAQGIK	1
		EGGTVVYGGK	1
		GAPTTSLISVAVTK	1
		GEVITTYCPANNEPIAR	1
		IWADIPAPK	1
		MIGGPILPSER	1
		QASVADYEETVK	1
		QVGLMVQER	1
		STCTINYSK	1
		VGNPWDPNVLYGPLHTK	1
		VNLLSFTGSTQVGK	1
ALDH9A1	8	ANDTTFGLAAGVFTR	1
		EVNLAVQNAK	1
		IGDPLLEDTR	1
		STGTFVVSQPLNYR	1
		VEPADASGTEK	1
		VIATFTCSGEK	1
		VLCGGDIYVPEDPK	1
		VSFTGSVPTGMK	1
ALDOA	13	AAQEEYVKR	1
		ADDGRPFPQVIK	1
		ALANSLACQGK	1
		FSHEEIAMATVTALR	1
		GILAADESTGSIAK	1
		GILAADESTGSIAKR	1
		IGEHTPSALAIMENANVLAR	1
		LQSIGTENTEENR	1
		LQSIGTENTEENRR	1
		PYQYPALTPEQK	1
		QLLLTADDR	1
		TVPPAVTGITFLSGGQSEEEASINLNAINK	1
		VNPCIGGVILFHETLYQK	1
ALDOB	3	FPALTQEQK	1
		GILAADESVGTMGNR	1
		LDQGGAPLAGTNK	1
ALDOC	8	ALQASALNAWR	1
		DNAGAATEEFIK	1
		GILAADESVGSMAK	1
		GVVPLAGTDGETTTQGLDGLSER	1
		LSQIGVENTEENR	1
		QVLFSADDR	1
		TPSALAILENANVLAR	1
		VDKGVVPLAGTDGETTTQGLDGLSER	1
ALG1	2	DAGSGLVTR	1
		SEPEDPVTER	1
ALG5	2	ETLPSIWDSPTK	1
		QLSVVVPSYNEEK	1
ALYREF	2	MDMSLDDIIK	1
		SLGTADVHFER	1
AMACR	3	LQLGPEILQR	1
		LSGFGQSGSFCR	1
		SDVLLEPFR	1
AMBP	5	EYCGVPGDGDEELLR	1
		GECVPGEQEPEPILIPR	1
		GVCEETSGAYEK	1
		TVAACNLPIVR	1
		VVAQGVGIPEDSIFTMADR	1
ANAPC15	1	STLFPSLFPR	1
ANK1	1	DSGEGDTTSLR	1
ANK2	3	EQLQTVQDK	1
		EQVQQDFSGK	1
		LYLQTPTSSER	1
ANKFY1	2	GADMSVPDEK	1
		SGCDVNSPR	1
ANKHD1	1	SAPAGASEPPPPGGVGLGIR	1
ANKRD10	1	AGATLNVSTTR	1
ANKRD54	1	AAAAGDADDEPR	1
ANP32B	3	DISTLEPLK	1
		IFGGLDMLAEK	1
		LPNLTHLNLSGNK	1
ANPEP	13	AQIINDAFNLASAHK	1
		DHSAIPVINR	1
		DLMVLNDVYR	1
		DLTALSNMLPK	1
		DNEETGFGSGTR	1
		ENSLLFDPLSSSSSNK	1
		LPNTLKPDSYR	1
		MLSSFLSEDVFK	1
		SEYMEGNVR	1
		SIQLPTTVR	1
		VNYDEENWR	1
		VVATTQMQAADAR	1
		YLSYTLNPDLIR	1
ANXA1	9	DITSDTSGDFR	1
		GGPGSAVSPYPTFNPSSDVAALHK	1
		GLGTDEDTLIEILASR	1
		GTDVNVFNTILTTR	1
		GVDEATIIDILTK	1
		ILVALCGGN	1
		SEDFGVNEDLADSDAR	1
		SEIDMNDIK	1
		TPAQFDADELR	1
ANXA11	5	DAQELYAAGENR	1
		DESTNVDMSLAQR	1
		GTITDAPGFDPLR	1
		NTPAFFAER	1
		SETDLLDIR	1
ANXA2	4	AEDGSVIDYELIDQDAR	1
		GVDEVTIVNILTNR	1
		QDIAFAYQR	1
		RAEDGSVIDYELIDQDAR	1
ANXA3	9	ALLTLADGR	1
		DISQAYYTVYK	1
		DYPDFSPSVDAEAIQK	1
		GAGTNEDALIEILTTR	1
		GIGTDEFTLNR	1
		MLISILTER	1
		NTPAFLAER	1
		SEIDLLDIR	1
		SLGDDISSETSGDFR	1
ANXA4	12	AASGFNAMEDAQTLR	1
		AEIDMLDIR	1
		DEGNYLDDALVR	1
		GAGTDEGCLIEILASR	1
		GLGTDDNTLIR	1
		GLGTDEDAIISVLAYR	1
		ISQTYQQQYGR	1
		QDAQDLYEAGEK	1
		SDTSFMFQR	1
		SETSGSFEDALLAIVK	1
		VLVSLSAGGR	1
		VLVSLSAGGRDEGNYLDDALVR	1
ANXA5	11	ALLLLCGEDD	1
		DLLDDLKSELTGK	1
		ETSGNLEQLLLAVVK	1
		GAGTDDHTLIR	1
		GLGTDEESILTLLTSR	1
		GTVTDFPGFDER	1
		LIVALMKPSR	1
		MLVVLLQANR	1
		NFATSLYSMIK	1
		SEIDLFNIR	1
		VLTEIIASR	1
ANXA6	25	ALIEILATR	1
		ALLALCGGED	1
		AMEGAGTDEK	1
		CLIEILASR	1
		DAFVAIVQSVK	1
		DAISGIGTDEK	1
		DLEADIIGDTSGHFQK	1
		EAILDIITSR	1
		EDAQVAAEILEIADTPSGDK	1
		EEGGENLDQAR	1
		GELSGDFEK	1
		GLGTDEDTIIDIITHR	1
		GTVRPANDFNPDADAK	1
		ILISLATGHR	1
		LILGLMMPPAHYDAK	1
		LIVGLMRPPAYCDAK	1
		MTNYDVEHTIK	1
		SEIDLLNIR	1
		SEISGDLAR	1
		SELDMLDIR	1
		SLEDALSSDTSGHFR	1
		SLHQAIEGDTSGDFLK	1
		STPEYFAER	1
		TNEQMHQLVAAYK	1
		TTGKPIEASIR	1
ANXA7	8	AMQGAGTQER	1
		EFSGYVESGLK	1
		GAGTDDSTLVR	1
		LGTDESCFNMILATR	1
		SEIDLVQIK	1
		TILQCALNRPAFFAER	1
		TLGTMIAGDTSGDYR	1
		VLIEILCTR	1
AOC1	2	ALCLFEMPTGVPLR	1
		LQPSSTTTMAK	1
AOC3	5	DAFCVFEQNQGLPLR	1
		EALAIVFFGR	1
		NLVTMTTAPR	1
		SPVPPGPAPPLQFYPQGPR	1
		YVDGGFGMGK	1
AP1B1	3	DCPLNAEAASSK	1
		LLSTDPVAAK	1
		LQSSNIFTVAK	1
AP1G1	4	AVEYNALFK	1
		GYALTAIMK	1
		VLTTAGSYVR	1
		YVALTSLLK	1
AP1M2	1	YITQSGDYQLR	1
AP2A1	4	DFLTPPLLSVR	1
		ILVAGDSMDSVK	1
		LEPNAQAQMYR	1
		YGGAPQALTLK	1
AP2B1	2	IQPGNPNYTLSLK	1
		LLSTDPVTAK	1
AP2M1	2	SISFIPPDGEFELMR	1
		TFITQQGIK	1
AP3B1	2	LLDSITVPVAR	1
		TVIGSVLLR	1
AP3D1	1	VDSCASMYSR	1
AP3S1	3	NINIGDISIK	1
		NMNLPEIPR	1
		SEAGLAGAPAR	1
APCS	5	AYSLFSYNTQGR	1
		GYVIIKPLVWV	1
		IVLGQEQDSYGGK	1
		QGYFVEAQPK	1
		VGEYSLYIGR	1
APEH	7	ALDVSASDDEIAR	1
		QVLLSEPEEAAALYR	1
		SALYYVDLIGGK	1
		SFNLSALEK	1
		TPLLLMLGQEDR	1
		VGFLPSAGK	1
		VTSVVVDVVPR	1
APEX1	2	EGYSGVGLLSR	1
		NAGFTPQER	1
API5	4	ASEDTTSGSPPK	1
		ELPQFATGENLPR	1
		EVEELILTESK	1
		TLPDEVLTK	1
APMAP	4	EPPLLLGVLHPNTK	1
		GLFEVNPWK	1
		LLEYDTVTR	1
		LLLSSETPIEGK	1
APOA1	16	AKPALEDLR	1
		ATEHLSTLSEK	1
		DLATVYVDVLK	1
		DSGRDYVSQFEGSALGK	1
		DYVSQFEGSALGK	1
		EQLGPVTQEFWDNLEK	1
		LLDNWDSVTSTFSK	1
		LSPLGEEMR	1
		LSPLGEEMRDR	1
		QGLLPVLESFK	1
		THLAPYSDELR	1
		VKDLATVYVDVLK	1
		VQPYLDDFQK	1
		VQPYLDDFQKK	1
		VSFLSALEEYTK	1
		WQEEMELYR	1
APOA2	1	SPELQAEAK	1
APOA4	11	ALVQQMEQLR	1
		IDQNVEELK	1
		ISASAEELR	1
		LAPLAEDVR	1
		LEPYADQLR	1
		LGEVNTYAGDLQK	1
		LTPYADEFK	1
		SLAPYAQDTQEK	1
		TQVSTQAEQLR	1
		VEPYGENFNK	1
		VNSFFSTFK	1
APOB	30	ALVEQGFTVPEIK	1
		ATFQTPDFIVPLTDLR	1
		ATGVLYDYVNK	1
		AVSMPSFSILGSDVR	1
		DNVFDGLVR	1
		EELCTMFIR	1
		EFQVPTFTIPK	1
		ENFAGEATLQR	1
		ESDEETQIK	1
		EVGTVLSQVYSK	1
		FPEVDVLTK	1
		FVTQAEGAK	1
		GNVATEISTER	1
		IEIPLPFGGK	1
		ITENDIQIALDDAK	1
		LAPGELTIIL	1
		LTISEQNIQR	1
		NMEVSVATTTK	1
		QTEATMTFK	1
		SEYQADYESLR	1
		SPSQADINK	1
		SVSDGIAALDLNAVANK	1
		SVSLPSLDPASAK	1
		TEVIPPLIENR	1
		TGISPLALIK	1
		TLADLTLLDSPIK	1
		TLQGIPQMIGEVIR	1
		TSSFALNLPTLPEVK	1
		VPQTDMTFR	1
		VSTAFVYTK	1
APOBR	9	AILDGEEAR	1
		EAQAAEELGVVAVGK	1
		ETEDEEAEADR	1
		ETEPESLEHVR	1
		GSQVEAFESR	1
		LLDAEGLMVTGGR	1
		MEELVQAEEAQEER	1
		QTEYGAVPGER	1
		TEEAAESQTAGR	1
APOC3	2	DALSSVQESQVAQQAR	1
		GWVTDGFSSLK	1
APOD	4	CPNPPVQENFDVNK	1
		MTVTDQVNCPK	1
		NILTSNNIDVK	1
		NPNLPPETVDSLK	1
APOE	9	AATVGSLAGQPLQER	1
		GEVQAMLGQSTEELR	1
		LAVYQAGAR	1
		LEEQAQQIR	1
		LGADMEDVCGR	1
		LGPLVEQGR	1
		LQAEAFQAR	1
		SELEEQLTPVAEETR	1
		VQAAVGTSAAPVPSDNH	1
APOH	3	ATVVYQGER	1
		TCPKPDDLPFSTVVPLK	1
		TDASDVKPC	1
APOL1	1	VTEPISAESGEQVER	1
APOL2	3	ISAEGGEQVER	1
		NLDQSGTNVAK	1
		VVEGPAQAMSR	1
APOM	1	NQEACELSNN	1
APPL1	2	LIDPQTQVTR	1
		TNPFGESGGSTK	1
APPL2	1	LIDPQTQVSR	1
APRT	6	ADSELQLVEQR	1
		DISPVLKDPASFR	1
		IDYIAGLDSR	1
		LAPVPFFSLLQYE	1
		SFPDFPTPGVVFR	1
		VVVVDDLLATGGTMNAACELLGR	1
ARAF	1	GSPSPASVSSGR	1
ARCN1	7	ENVNLAQIR	1
		IEGLLAAFPK	1
		LFTAESLIGLK	1
		SEGETIMSSSMGK	1
		SFPVNSDVGVLK	1
		VAPAPARPSGPSK	1
		VTQVDGNSPVR	1
ARF4	3	DAVLLLFANK	1
		IQEVADELQK	1
		QDLPNAMAISEMTDK	1
ARF5	2	QDMPNAMPVSELTDK	1
		VQESADELQK	1
ARFGAP1	1	VSGQPQSVTASSDK	1
ARFGAP2	3	AISSDMFFGR	1
		EVDAEYEAR	1
		SSGLESSEAR	1
ARFGEF1	1	VDTQDQGMYR	1
ARFIP1	3	LAQQGSDLIVPAGGQR	1
		TDLEELNLGPR	1
		TIEDTLMTVK	1
ARG1	2	GGVEEGPTVLR	1
		TIGIIGAPFSK	1
ARHGAP1	5	AINPINTFTK	1
		NPEQEPIPIVLR	1
		NWPSDEMPDFPK	1
		SSSPELVTHLK	1
		VPATLQVLQTLPEENYQVLR	1
ARHGAP17	1	DPVSAAVPAPGR	1
ARHGAP18	5	AFQAVQNLPTK	1
		DDEASNLVGEEK	1
		ETAPGGTESQSLR	1
		FLSQESGVAQTLK	1
		GLETEGLLR	1
ARHGAP26	1	SLQEFATVLR	1
ARHGAP4	3	LPAPVLVVLR	1
		QTIETEEVNK	1
		SVPTTTAGATEAGPLR	1
ARHGAP45	2	AGSPSPQPSGELPR	1
		IVEVEQDNK	1
ARHGDIA	3	AEEYEFLTPVEEAPK	1
		SIQEIQELDKDDESLR	1
		TDYMVGSYGPR	1
ARHGDIB	1	TLLGDGPVVTDPK	1
ARHGEF1	2	ADLISEDVQR	1
		ELVPPDTLHSLPK	1
ARHGEF16	1	IEPSELPLPGGGNR	1
ARHGEF2	4	AGAAPVAPEK	1
		ATEAGSLEAR	1
		MQDIPEETESR	1
		SPQEEALQR	1
ARHGEF5	1	TTPQQGASGPGR	1
ARL1	2	AILVVFANK	1
		ILILGLDGAGK	1
ARL3	2	ILLLGLDNAGK	1
		LSCVPVLIFANK	1
ARL6IP5	2	AWDDFFPGSDR	1
		MDVNIAPLR	1
ARPC1B	2	ASSEGGTAAGAGLDSLHK	1
		NSVSQISVLSGGK	1
ARPC2	9	DDETMYVESK	1
		DNTINLIHTFR	1
		DSIVHQAGMLK	1
		ELQAHGADELLK	1
		IIEETLALK	1
		MILLEVNNR	1
		NCFASVFEK	1
		VTVVFSTVFKDDDDVVIGK	1
		YFQFQEEGK	1
ARPC3	1	LIGNMALLPIR	1
ARPC4	3	ELLLQPVTISR	1
		TATLRPYLSAVR	1
		VLIEGSINSVR	1
ARPC5	3	ALAAGGVGSIVR	1
		QGNMTAALQAALK	1
		VDVDEYDENK	1
ARPC5L	1	ALAVGGLGSIIR	1
ARPIN	2	GDGPFLDSLAK	1
		GNEIEPNFSATR	1
ARRB1	1	ACGVDYEVK	1
ARRDC1	1	VVYSPGEPLAGTVR	1
ARSA	2	MGMYPGVLVPSSR	1
		QSLFFYPSYPDEVR	1
ARSB	1	TISEGSPSPR	1
ARSL	1	SGMVSSIGYR	1
ASAH1	6	DCPDPCIGW	1
		ESLDVYELDAK	1
		LTVYTTLIDVTK	1
		NMINTFVPSGK	1
		STYPPSGPTYR	1
		WYVVQTNYDR	1
ASB15	1	LPLPPAIQR	1
ASB8	1	GLPLPASLK	1
ASH2L	1	SDPLFSAQR	1
ASL	8	DVLFPGYTHLQR	1
		FNASIAYDR	1
		FVGAVDPIMEK	1
		INVLPLGSGAIAGNPLGVDR	1
		LNSNDEDIHTANER	1
		NDQVVTDLR	1
		NPDSLELIR	1
		VAEEWAQGTFK	1
ASMTL	3	ETLPPFPTR	1
		VDASACGMER	1
		VVLASASPR	1
ASPSCR1	3	AAGSPSPLPAPDPAPK	1
		APAAAPFVPFSGGGQR	1
		IALQLDDGSR	1
ASS1	2	FELSCYSLAPQIK	1
		NQAPPGLYTK	1
ATG5	1	SQVINEMQK	1
ATG9A	1	SFSPLQPGQAPTGR	1
ATIC	10	APGQLALFSVSDK	1
		DVSELTGFPEMLGGR	1
		EALGIPAAASFK	1
		NIPEDNADMAR	1
		NLTALGLNLVASGGTAK	1
		SGVAYIAAPSGSAADK	1
		SLFSNVVTK	1
		TLTPISAAYAR	1
		VVACNLYPFVK	1
		YTQSNSVCYAK	1
ATP1A1	12	AVAGDASESALLK	1
		AVFQANQENLPILK	1
		CIELCCGSVK	1
		DGPNALTPPPTTPEWIK	1
		DMTSEQLDDILK	1
		GIVVYTGDR	1
		IVEIPFNSTNK	1
		NIAFFSTNCVEGTAR	1
		NPNTSEPQHLLVMK	1
		SPDFTNENPLETR	1
		TSATWLALSR	1
		YEPAAVSEQGDK	1
ATP1A3	1	DVAGDASESALLK	1
ATP1B1	5	AYGENIGYSEK	1
		DDMIFEDCGDVPSEPK	1
		SYEAYVLNIVR	1
		VAPPGLTQIPQIQK	1
		YNPNVLPVQCTGK	1
ATP2A2	3	EFDELNPSAQR	1
		IGIFGQDEDVTSK	1
		MNVFDTELK	1
ATP2A3	4	MEAAHLLPAADVLR	1
		SQMAAVEPER	1
		TAPLTPTSR	1
		VVMITGDNK	1
ATP2B1	1	TVIEPMASEGLR	1
ATP2B4	3	QIPSPDVFLPK	1
		TVIEPMACDGLR	1
		VLPANSMAESR	1
ATP5F1A	9	AVDSLVPIGR	1
		EAYPGDVFYLHSR	1
		EIVTNFLAGFEA	1
		ILGADTSVDLEETGR	1
		TGAIVDVPVGEELLGR	1
		TGTAEMSSILEER	1
		TSIAIDTIINQK	1
		VLSIGDGIAR	1
		VVDALGNAIDGK	1
ATP5F1B	16	AIAELGIYPAVDPLDSTSR	1
		FLSQPFQVAEVFTGHMGK	1
		FTQAGSEVSALLGR	1
		IGLFGGAGVGK	1
		IMDPNIVGSEHYDVAR	1
		IMNVIGEPIDER	1
		IPSAVGYQPTLATDMGTMQER	1
		IPVGPETLGR	1
		LVLEVAQHLGESTVR	1
		TIAMDGTEGLVR	1
		TVLIMELINNVAK	1
		VALTGLTVAEYFR	1
		VALVYGQMNEPPGAR	1
		VLDSGAPIK	1
		VLDSGAPIKIPVGPETLGR	1
		VVDLLAPYAK	1
ATP5F1C	1	ELIEIISGAAALD	1
ATP5F1D	2	AQAELVGTADEATR	1
		IEANEALVK	1
ATP5ME	1	VPPVQVSPLIK	1
ATP5MF	1	DFSPSGIFGAFQR	1
ATP5MG	1	VELVPPTPAEIPR	1
ATP5PD	1	SWNETLTSR	1
ATP5PF	4	FEDPKFEVIEKPQA	1
		FEVIEKPQA	1
		QMFGNADMNTFPTFK	1
		QTSGGPVDASSEYQQELER	1
ATP5PO	5	LVRPPVQVYGIEGR	1
		SFLSQGQVLK	1
		TDPSILGGMIVR	1
		VAASVLNPYVK	1
		YATALYSAASK	1
ATP6V0A1	1	EMASGVNTR	1
ATP6V0D1	1	LYPEGLAQLAR	1
ATP6V1A	7	FTMVQVWPVR	1
		GNEMSEVLR	1
		GVNVSALSR	1
		LAEMPADSGYPAYLGAR	1
		LPANHPLLTGQR	1
		TALVANTSNMPVAAR	1
		TVISQSLSK	1
ATP6V1B2	5	AVVQVFEGTSGIDAK	1
		IPQSTLSEFYPR	1
		NFIAQGPYENR	1
		SGQVLEVSGSK	1
		TVSGVNGPLVILDHVK	1
ATP6V1D	1	AVELLVELASLQTSFVTLDEAIK	1
ATP6V1E1	3	IQMSNLMNQAR	1
		LDLIAQQMMPEVR	1
		YQVLLDGLVLQGLYQLLEPR	1
ATP6V1F	2	DTTINEIEDTFR	1
		GMFTAEDLR	1
ATP6V1G1	2	EEAQAEIEQYR	1
		MTILQTYFR	1
ATP6V1H	3	GAVDAAVPTNIIAAK	1
		LLEVSDDPQVLAVAAHDVGEYVR	1
		YNALLAVQK	1
ATP8B2	1	LYEPGQLNLLFNK	1
ATP9A	3	LPTAADLLQIR	1
		SSTIPEQLGR	1
		VPADMIFLR	1
ATXN2L	4	ISLAPTDVK	1
		NVDFNYATK	1
		STSTPTSPGPR	1
		TLEPQELAR	1
ATXN3	2	AIQLSMQGSSR	1
		MAEGGVTSEDYR	1
AVEN	1	NMEPEQPSTSK	1
AVL9	1	IGNVMVTTSR	1
AZGP1	6	AGEVQEPELR	1
		AYLEEECPATLR	1
		EIPAWVPFDPAAQITK	1
		QDPPSVVVTSHQAPGEK	1
		WEAEPVYVQR	1
		YSLTYIYTGLSK	1
AZU1	1	QFPFLASIQNQGR	1
B2M	2	VEHSDLSFSK	1
		VNHVTLSQPK	1
BABAM1	1	AVGAQASVGSR	1
BAG2	6	EAATAVEQEK	1
		EELNLTANR	1
		FLDDLGNAK	1
		LLESLDQLELR	1
		NPQQQESLK	1
		TLQQNAESR	1
BAG3	2	GMPETTQPDK	1
		TEAAAAAPQR	1
BAG6	7	AGSSESIAAFIQR	1
		DLEAPEVQESYR	1
		ENASPAPGTTAEEAMSR	1
		ESFSLVQVQPGVDIIR	1
		LINLVGESLR	1
		LLGNTFVALSDLR	1
		LQEDPNYSPQR	1
BAIAP2	5	AFPAQTASGFK	1
		MGELASESQGSK	1
		SLSPPQSQSK	1
		SSSMAAGLER	1
		TIMEQFNPSLR	1
BAIAP2L1	3	AYTSPLIDMFNNPATAAPNSQR	1
		NVMEQFNPGLR	1
		VNNSTGTSEDPSLQR	1
BANF1	2	AYVVLGQFLVLK	1
		DFVAEPMGEKPVGSLAGIGEVLGK	1
BAP18	1	VGEIFSAAGAAFTK	1
BASP1	5	AEGAATEEEGTPK	1
		ESEPQAAAEPAEAK	1
		ETPAATEAPSSTPK	1
		SDGAPASDSKPGSSEAAPSSK	1
		TEAPAAPAAQETK	1
BAX	4	GGGPTSSEQIMK	1
		IGDELDSNMELQR	1
		MDGSGEQPR	1
		MIAAVDTDSPR	1
BCAM	5	AGAAGTAEATAR	1
		GDGSPSPEYTLFR	1
		LSVPPLVEVMR	1
		SPPYQLDSQGR	1
		VAYLDPLELSEGK	1
BCAP31	3	AENQVLAMR	1
		LDVGNAEVK	1
		LQAAVDGPMDK	1
BCAS1	3	TGDQAADSSLGSVK	1
		TITPPEPEPTGAPQK	1
		VPGDSQQEAK	1
BCAS2	1	YELPAPSSGQK	1
BCL2L13	2	EPDTEVITVEK	1
		ILVPLVLLR	1
BCLAF1	3	SAAMTLNER	1
		SSFYPDGGDQETAK	1
		TIAPQNAPR	1
BDH1	1	VVNISSMLGR	1
BDH2	3	QIDQFANEVER	1
		SVAADFIQQGIR	1
		VIATDINESK	1
BGN	6	EISPDTTLLDLQNNDISELR	1
		IQAIELEDLLR	1
		LAIQFGNYK	1
		VGVNDFCPMGFGVK	1
		VPSGLPDLK	1
		VVQCSDLGLK	1
BID	1	IEADSESQEDIIR	1
BIN1	3	AQPSDNAPAK	1
		GVFPENFTER	1
		LDLPPGFMFK	1
BIN2	2	ASLGTGTASPR	1
		SLVISPPVR	1
BLOC1S2	1	AAAAEGVLATR	1
BLOC1S5	1	LQAANDSVCR	1
BLVRA	2	FGFPAFSGISR	1
		SGSLENVPNVGVNK	1
BLVRB	3	LQAVTDDHIR	1
		NDLSPTTVMSEGAR	1
		TVAGQDAVIVLLGTR	1
BNC2	2	EGQAVAVPSSK	1
		LSEQDWPAYFK	1
BOD1L1	1	AGPATTTSSETR	1
BOLA2	4	DLEAEHVEVEDTTLNR	1
		FEGKPLLQR	1
		MELSAEYLR	1
		TLTPDQWAR	1
BOP1	1	LTDEQVALVR	1
BPI	1	GFPLPTPAR	1
BPNT1	5	LAQMSICSSLAR	1
		LVASAYSIAQK	1
		LVTDCVAAMNPDAVLR	1
		TCATDLQTK	1
		VIAEGDLGIVEK	1
BRCC3	1	FAYTGTEMR	1
BRI3BP	1	SSPSGPSNPSNPSVEEK	1
BRK1	1	AGQEDPVQR	1
BROX	2	ENITEDEAK	1
		IPTEAPQLELK	1
BSG	3	FFVSSSQGR	1
		GSDQAIITLR	1
		SESVPPVTDWAWYK	1
BST2	1	LQDASAEVER	1
BUB3	5	LNQPPEDGISSVK	1
		LYDVPANSMR	1
		TPCNAGTFSQPEK	1
		VAVEYLDPSPEVQK	1
		VYTLSVSGDR	1
BZW1	2	DINAVAASLR	1
		LMELFPANK	1
BZW2	1	LLELFPVNR	1
C11orf54	2	APLVCLPVFVSR	1
		TGPLNFVTCMR	1
C11orf68	2	LGVLEADSAIR	1
		TTPATELDAWLAK	1
C11orf96	1	STQSLSLQR	1
C12orf57	1	ASASTQPAALSAEQAK	1
C12orf60	1	EMQSVVDAR	1
C19orf25	1	LQQAGNVLR	1
C1QB	1	GNLCVNLMR	1
C1QBP	3	AFVDFLSDEIK	1
		EVSFQSTGESEWK	1
		VEEQEPELTSTPNFVVEVIK	1
C1QC	2	FQSVFTVTR	1
		TNQVNSGGVLLR	1
C1R	1	LPVANPQACENWLR	1
C1RL	1	GSEAINAPGDNPAK	1
C1S	2	IIGGSDADIK	1
		TMQENSTPRED	1
C2	2	AVISPGFDVFAK	1
		VLMSVLNDNSR	1
C3	31	ACEPGVDYVYK	1
		ADIGCTPGSGK	1
		AELQCPQPAAR	1
		AGDFLEANYMNLQR	1
		DFDFVPPVVR	1
		DICEEQVNSLPGSITK	1
		DSCVGSLVVK	1
		ENEGFTVTAEGK	1
		FISLGEACK	1
		GYTQQLAFR	1
		ILLQGTPVAQMTEDAVDAER	1
		IPIEDGSGEVVLSR	1
		LVAYYTLIGASGQR	1
		NTMILEICTR	1
		QELSEAEQATR	1
		QPSSAFAAFVK	1
		QPVPGQQMTLK	1
		SDDKVTLEER	1
		SGIPIVTSPYQIHFTK	1
		SGSDEVQVGQQR	1
		SNLDEDIIAEENIVSR	1
		SSLSVPYVIVPLK	1
		TGLQEVEVK	1
		TIYTPGSTVLYR	1
		TVMVNIENPEGIPVK	1
		VELLHNPAFCSLATTK	1
		VLLDGVQNPR	1
		VPVAVQGEDTVQSLTQGDGVAK	1
		VTIKPAPETEK	1
		VYAYYNLEESCTR	1
		YYTYLIMNK	1
C4A	1	DSSTWLTAFVLK	1
C4B	2	AEMADQAAAWLTR	1
		GSSTWLTAFVLK	1
C4BPA	6	EDVYVVGTVLR	1
		FSAICQGDGTWSPR	1
		GYILVGQAK	1
		LMQCLPNPEDVK	1
		LSLEIEQLELQR	1
		YTCLPGYVR	1
C4BPB	1	ALLAFQESK	1
C5	4	DSSVPNTGTAR	1
		ESYSGVTLDPR	1
		LQGTLPVEAR	1
		TDAPDLPEENQAR	1
C5AR1	1	STVDTMAQK	1
C6	1	ECNNPAPQR	1
C7	2	DSCTLPASAEK	1
		GCPTEEGCGER	1
C7orf50	1	ELDEEGSDPPLPGR	1
C8G	1	SLPVSDSVLSGFEQR	1
C8orf82	1	YEAAFPFLSPCGR	1
C9	4	AIEDYINEFSVR	1
		DGNTLTYYR	1
		LSPIYNLVPVK	1
		VVEESELAR	1
CA1	4	ADGLAVIGVLMK	1
		GGPFSDSYR	1
		VLDALQAIK	1
		YSSLAEAASK	1
CA2	6	EPISVSSEQVLK	1
		GGPLDGTYR	1
		QSPVDIDTHTAK	1
		SADFTNFDPR	1
		VVDVLDSIK	1
		YDPSLKPLSVSYDQATSLR	1
CA9	1	VIEASFPAGVDSSPR	1
CACNA2D1	3	FFGEIDPSLMR	1
		LEETITQAR	1
		YQDLYTVEPNNAR	1
CACYBP	1	ASEELQKDLEEVK	1
CAD	10	AAFALGGLGSGFASNR	1
		AALVLEDGSVLR	1
		ASDPGLPAEEPK	1
		EATAGNPGGQTVR	1
		FLSSAAAVSK	1
		LSLDDLLQR	1
		MALLATVLGR	1
		SVGEVMGIGR	1
		TSSSFAAAMAR	1
		VLGTSPEAIDSAENR	1
CALD1	16	EAEGAPQVEAGK	1
		EAEGAPQVEAGKR	1
		EFDPTITDASLSLPSR	1
		GETESEEFEK	1
		GNVFSSPTAAGTPNK	1
		GNVFSSPTAAGTPNKETAGLK	1
		LEQYTSAIEGTK	1
		MQNDTAENETTEK	1
		MQNDTAENETTEKEEK	1
		NDDDEEEAAR	1
		QKEFDPTITDASLSLPSR	1
		QQEAALELEELK	1
		TTESQEETVVMSLK	1
		TTTTNTQVEGDDEAAFLER	1
		VLEEEEQRR	1
		YEIEETETVTK	1
CALR	3	EQFLDGDGWTSR	1
		FYALSASFEPFSNK	1
		GLQTSQDAR	1
CALU	2	TFDQLTPEESK	1
		TFDQLTPEESKER	1
CAMP	2	CMGTVTLNQAR	1
		TTQQSPEDCDFK	1
CAND1	17	AADIDQEVK	1
		ALTLIAGSPLK	1
		ASASYHISNLLEK	1
		AVAALLTIPEAEK	1
		DLLDTVLPHLYNETK	1
		EGPAVVGQFIQDVK	1
		FMATNDLMTELQK	1
		FTISDHPQPIDPLLK	1
		GYLISGSSYAR	1
		ITSEALLVTQQLVK	1
		LSTLCPSAVLQR	1
		LTLIDPETLLPR	1
		MLTGPVYSQSTALTHK	1
		SVILEAFSSPSEEVK	1
		TLEDPDLNVR	1
		TVIGELPPASSGSALAANVCK	1
		TYIQCIAAISR	1
CANX	5	AEEDEILNR	1
		APVPTGEVYFADSFDR	1
		GTLSGWILSK	1
		IVDDWANDGWGLK	1
		KIPNPDFFEDLEPFR	1
CAP1	11	ADMQNLVER	1
		ALLVTASQCQQPAENK	1
		CVNTTLQIK	1
		EMNDAAMFYTNR	1
		EPAVLELEGK	1
		INSITVDNCK	1
		LSDLLAPISEQIK	1
		LVTTVTEIAG	1
		NSLDCEIVSAK	1
		SSEMNVLIPTEGGDFNEFPVPEQFK	1
		VENQENVSNLVIEDTELK	1
CAP2	3	ANMQGLVER	1
		EFPIPEQFK	1
		LMDSMVAEFLK	1
CAPG	8	ANAQAAALYK	1
		EGNPEEDLTADK	1
		EVQGNESDLFMSYFPR	1
		MYTAIPQSGSPFPGSVQDPGLHVWR	1
		QAALQVAEGFISR	1
		TSTGAPAAIK	1
		VSDATGQMNLTK	1
		YQEGGVESAFHK	1
CAPN1	11	APSDLYQIILK	1
		CLQSGTLFR	1
		DEAFPPVPQSLGYK	1
		DFFLANASR	1
		LDETDDPDDYGDR	1
		LEICNLTPDALK	1
		MAIESAGFK	1
		NYPATFWVNPQFK	1
		QLAGEDMEISVK	1
		SGSMSAYEMR	1
		YLGQDYEQLR	1
CAPN2	4	FADDQLIIDFDNFVR	1
		IMVDMLDSDGSGK	1
		SDGFSIETCK	1
		SGTMNSYEMR	1
CAPN5	2	AVTAADMEAR	1
		VFTDVPSNCR	1
CAPNS1	3	MFLVNSFLK	1
		SMVAVMDSDTTGK	1
		TDGFGIDTCR	1
CAPRIN1	3	LNQDQLDAVSK	1
		SFMALSQDIQK	1
		YQEVTNNLEFAK	1
CAPS	2	EAVIAAAFAK	1
		GASGIQGLAR	1
CAPSL	1	LTTATDPIER	1
CAPZA1	5	ADFDDRVSDEEK	1
		DVQDSLTVSNEAQTAK	1
		EASDPQPEEADGGLK	1
		FITHAPPGEFNEVFNDVR	1
		FTITPPTAQVVGVLK	1
CAPZA2	3	ADLEEQLSDEEK	1
		FIIHAPPGEFNEVFNDVR	1
		FTITPSTTQVVGILK	1
CAPZB	7	DYLLCDYNR	1
		MSDQQLDCALDLMR	1
		RLPPQQIEK	1
		SDQQLDCALDLMR	1
		SGSGTMNLGGSLTR	1
		STLNEIYFGK	1
		YDPPLEDGAMPSAR	1
CARD16	1	VLNQEEMEK	1
CARHSP1	3	GNVVPSPLPTR	1
		LQAVEVVITHLAPGTK	1
		SSEPPPPPQPPTHQASVGLLDTPR	1
CARM1	1	GAAVDEYFR	1
CARMIL1	2	DGQSSPQPSPR	1
		VALLPPVLK	1
CARS1	6	ALCDNVDTR	1
		APVDITGQFEK	1
		DNILPELGVR	1
		LVPEAVGDQK	1
		SYISFDILR	1
		VSEYVPEIVNFVQK	1
CASK	5	FNSFYGDPPEELPDFSEDPTSSGLLAAER	1
		MLMLDPAER	1
		NPPSDAVQR	1
		NTDEPMGITLK	1
		VGDIIQIISK	1
CASP1	4	FSFEQPDGR	1
		GDSPGVVWFK	1
		LCSLEEAQR	1
		SAEIYPIMDK	1
CASP3	1	SGTDVDAANLR	1
CAST	5	AAAPAPVSEAVCR	1
		GTVPDDAVEALADSLGK	1
		LAAAISEVVSQTPASTTQAGAPPR	1
		QAEPELDLR	1
		TSMCSIQSAPPEPATLK	1
CAT	9	ADVLTTGAGNPVGDK	1
		AFYVNVLNEEQR	1
		DLFNAIATGK	1
		DPILFPSFIHSQK	1
		FNTANDDNVTQVR	1
		LFAYPDTHR	1
		LNVITVGPR	1
		LSQEDPDYGIR	1
		NLSVEDAAR	1
CAV1	2	AMADELSEK	1
		YVDSEGHLYTVPIR	1
CAVIN1	7	ATEMVEVGADDDEGGAER	1
		IIGAVDQIQLTQAQLEER	1
		LEVNEAELLR	1
		SDQVNGVLVLSLLDK	1
		SFTPDHVVYAR	1
		VMIYQDEVK	1
		VPPFTFHVK	1
CAVIN2	5	GEDAAQAEK	1
		LVNMLDAVQENQHK	1
		SDGDPVQPAVLQVHQTS	1
		YEGSYALTSEEAER	1
		YQASTSNTVSK	1
CAVIN3	1	LASMLETLR	1
CBFB	1	AQQEDALAQQAFEEAR	1
CBR1	9	DVCTELLPLIKPQGR	1
		EGWPSSAYGVTK	1
		ILLNACCPGWVR	1
		LFSGDVVLTAR	1
		SCSPELQQK	1
		SETITEEELVGLMNK	1
		SSGIHVALVTGGNK	1
		VADPTPFHIQAEVTMK	1
		VVNVSSIMSVR	1
CBX1	1	NSDEADLVPAK	1
CBX3	4	DSDEADLVLAK	1
		LTWHSCPEDEAQ	1
		SLSDSESDDSK	1
		VEEAEPEEFVVEK	1
CC2D1A	8	APPVPAPAR	1
		AQLEQGGVGIR	1
		AQQQLAFLEGR	1
		GPASTPTYSPAPTQPAPR	1
		LALYQTAIESAR	1
		NLVESELQR	1
		QLQFYTEAAR	1
		TLENLLASIR	1
CCAR1	3	AGLLQPPVR	1
		IVSQPQPAR	1
		LLLPTPTVK	1
CCAR2	10	DDGEEEFAGAK	1
		FAEFQYLQPGPPR	1
		FSATEVTNK	1
		LAEAEETAR	1
		LTPLQLEIQR	1
		SPAPPLLHVAALGQK	1
		TLAAEMQELR	1
		VLLLSSPGLEELYR	1
		VQTLSNQPLLK	1
		VVTQNICQYR	1
CCDC124	3	AAFTAFEEAQLPR	1
		SPDNPMNQR	1
		VLEEGSVEAR	1
CCDC125	2	LNCENAVLK	1
		NIEESWIQK	1
CCDC137	1	VQAGPGSPR	1
CCDC183	1	QLELEEAVLK	1
CCDC22	1	LVVPELSSR	1
CCDC50	1	AAQVAQDEEIAR	1
CCDC93	1	TALPAGLSATEK	1
CCDC9B	1	ETPSEEEQAQK	1
CCL24	1	VVSYQLSSR	1
CCN2	1	LPSPDCPFPR	1
CCNT2	1	LETLDLDVR	1
CCS	3	ESAQPPAHL	1
		SAGLFQNPK	1
		SLIIDEGEDDLGR	1
CCT2	10	ASLSLAPVNIFK	1
		DASLMVTNDGATILK	1
		EALLSSAVDHGSDEVK	1
		EAVAMESYAK	1
		GATQQILDEAER	1
		LALVTGGEIASTFDHPELVK	1
		LTSFIGAIAIGDLVK	1
		MLPTIIADNAGYDSADLVAQLR	1
		NIGVDNPAAK	1
		QDLMNIAGTTLSSK	1
CCT3	15	ALDDMISTLK	1
		AMTGVEQWPYR	1
		AVAQALEVIPR	1
		EIQVQHPAAK	1
		ELGIWEPLAVK	1
		GISDLAQHYLMR	1
		IDDIVSGHK	1
		IPGGIIEDSCVLR	1
		IVLLDSSLEYK	1
		IVSRPEELR	1
		NLQDAMQVCR	1
		QGGAPDAGQE	1
		TAVETAVLLLR	1
		TLIQNCGASTIR	1
		VQSGNINAAK	1
CCT4	8	ALIAGGGAPEIELALR	1
		DALSDLALHFLNK	1
		ETLLNSATTSLNSK	1
		IGLIQFCLSAPK	1
		ITGCASPGK	1
		TLSGMESYCVR	1
		VIDPATATSVDLR	1
		VVSQYSSLLSPMSVNAVMK	1
CCT5	8	CPTLEQYAMR	1
		DTEPLIQTAK	1
		EMNPALGIDCLHK	1
		IADGYEQAAR	1
		IAILTCPFEPPKPK	1
		LDVTSVEDYK	1
		QQISLATQMVR	1
		SLHDALCVIR	1
CCT6A	8	ALQFLEEVK	1
		EMDRETLIDVAR	1
		GIDPFSLDALSK	1
		GLVLDHGAR	1
		IITEGFEAAK	1
		SETDTSLIR	1
		VATAQDDITGDGTTSNVLIIGELLK	1
		VLAQNSGFDLQETLVK	1
CCT6B	1	GIDPFSLDSLAK	1
CCT7	14	ATISNDGATILK	1
		GGAEQFMEETER	1
		INALTAASEAACLIVSVDETIK	1
		LLDVVHPAAK	1
		LPIGDVATQYFADR	1
		MMPTPVILLK	1
		MPTPVILLK	1
		QQLLIGAYAK	1
		SLHDAIMIVR	1
		SQDAEVGDGTTSVTLLAAEFLK	1
		STVDAPTAAGR	1
		TATQLAVNK	1
		TFSYAGFEMQPK	1
		YNFFTGCPK	1
CCT8	17	AIADTGANVVVTGGK	1
		ALAENSGVK	1
		APGFAQMLK	1
		AVDDGVNTFK	1
		DIDEVSSLLR	1
		DMLEAGILDTYLGK	1
		EDGAISTIVLR	1
		ETEGDVTSVK	1
		FAEAFEAIPR	1
		GEENLMDAQVK	1
		GSTDNLMDDIER	1
		LATNAAVTVLR	1
		LFVTNDAATILR	1
		LVPGGGATEIELAK	1
		QYGNEVFLAK	1
		TAEELMNFSK	1
		TVGATALPR	1
CD14	2	ATVNPSAPR	1
		FPAIQNLALR	1
CD151	1	TVVALCGQR	1
CD163	4	LQEGPTSCSGR	1
		LVDGVTECSGR	1
		LVGGDIPCSGR	1
		SSMSETTVGVVCR	1
CD2AP	3	ANTTAFLTPLEIK	1
		LGLFPSNFVK	1
		SVDFDSLTVR	1
CD2BP2	2	GNLGVYQETR	1
		LSGLADQMVAR	1
CD44	3	ALSIGFETCR	1
		ESSETPDQFMTADETR	1
		YGFIEGHVVIPR	1
CD47	2	AVEEPLNAFK	1
		STVPTDFSSAK	1
CD55	3	QSVTYACNK	1
		SCPNPGEIR	1
		TSFPEDTVITYK	1
CD59	1	ENELTYYCCK	1
CD5L	1	LVGGDNLCSGR	1
CD63	1	VMSEFNNNFR	1
CD74	2	DLISNNEQLPMLGR	1
		LTVTSQNLQLENLR	1
CD99	1	NANAEPAVQR	1
CDC37	7	DVQMLQDAISK	1
		EGEEAGPGDPLLEAVPK	1
		ELEVAEGGK	1
		LQAEAQQLR	1
		SMPWNVDTLSK	1
		TEEDSEEVR	1
		TGDEKDVSV	1
CDC42	2	NVFDEAILAALEPPEPK	1
		YVECSALTQK	1
CDC5L	5	DNEEETTDDPR	1
		ILLGGYQSR	1
		LGLLGLPAPK	1
		QVVQTPNTVLSTPFR	1
		VGQASEIAR	1
CDC73	3	AATENIPVVR	1
		SAPLEIGLQR	1
		SVTEGASAR	1
CDH1	7	DTANWLEINPDTGAISTR	1
		GQVPENEANVVITTLK	1
		MALEVGDYK	1
		NDVAPTLMSVPR	1
		NTGVISVVTTGLDR	1
		TAYFSLDTR	1
		VNFEDCTGR	1
CDH13	2	INENTGSVSVTR	1
		SIVVSPILIPENQR	1
CDH17	8	AENPEPLVFGVK	1
		DAYVFYAVAK	1
		DINDNRPTFLQSK	1
		DPEGLDISYSLR	1
		EGSQELNPAK	1
		IDHVTGEIFSVAPLDR	1
		LGVDTDPHTNTGYVIIK	1
		VSEDVAIGTK	1
CDHR2	1	VSALVDYER	1
CDHR5	1	DAAAPSQPLR	1
CDIPT	1	MIDLSGNPVLR	1
CDK16	1	LTDNLVALK	1
CDK9	3	GSQITQQSTNQSR	1
		LLVLDPAQR	1
		NPATTNQTEFER	1
CDKN2AIP	4	GISSSNEGVEEPSK	1
		SSSQTSTSQLPSK	1
		TSSEASVSSSVAK	1
		VTDAPTYTTR	1
CDKN2AIPNL	1	MVGGEAAAAVEELVSGVR	1
CDS2	2	AESAPLPVSADDTPEVLNR	1
		VDGETASDSESR	1
CDV3	1	TAPVQAPPAPVIVTETPEPAMTSGVYRPPGAR	1
CEACAM1	2	QIVGYAIGTQQATPGPANSGR	1
		TIIVTELSPVVAKPQIK	1
CEACAM21	1	TPGPAYSGR	1
CEACAM5	7	AYVCGIQNSVSANR	1
		CETQNPVSAR	1
		QIIGYVIGTQQATPGPAYSGR	1
		SDLVNEEATGQFR	1
		SDPVTLDVLYGPDTPIISPPDSSYLSGANLNLSCHSASNPSPQYSWR	1
		SDSVILNVLYGPDAPTISPLNTSYR	1
		TLTLFNVTR	1
CEACAM6	3	EVLLLAHNLPQNR	1
		SDPVTLNVLYGPDVPTISPSK	1
		VDGNSLIVGYVIGTQQATPGPAYSGR	1
CEACAM7	3	ENLVNEEVTR	1
		SDPVTLNVR	1
		TLVLLSATK	1
CEACAM8	1	IIGYVISNQQITPGPAYSNR	1
CELF1	1	GCAFVTFTTR	1
CES1	4	AGQLLSELFTNR	1
		EGASEEEIR	1
		FTPPQPAEPWSFVK	1
		TPEELQAER	1
CES2	8	ADHGDELPFVFR	1
		EASQAALQK	1
		FAPPEPPESWSGVR	1
		FTEEEEQLSR	1
		IQELEEPEER	1
		LGVLGFFSTGDK	1
		MIPGVVDGVFLPR	1
		SFFGGNYIK	1
CFB	11	ALFVSEEEK	1
		DAQYAPGYDK	1
		DISEVVTPR	1
		EELLPAQDIK	1
		FLCTGGVSPYADPNTCR	1
		LEDSVTYHCSR	1
		LLQEGQALEYVCPSGFYPYPVQTR	1
		LPPTTTCQQQK	1
		STGSWSTLK	1
		VSEADSSNADWVTK	1
		YGLVTYATYPK	1
CFH	6	DTSCVNPPTVQNAYIVSR	1
		LSYTCEGGFR	1
		SLGNVIMVCR	1
		TGDEITYQCR	1
		TGESVEFVCK	1
		WQSIPLCVEK	1
CFL1	5	ASGVAVSDGVIK	1
		AVLFCLSEDKK	1
		EILVGDVGQTVDDPYATFVK	1
		LGGSAVISLEGKPL	1
		NIILEEGKEILVGDVGQTVDDPYATFVK	1
CFL2	1	ASGVTVNDEVIK	1
CGREF1	2	GEAGGQAEAEGDAPGPR	1
		QETQEAPGPR	1
CHCHD2	1	LCEGFNEVLK	1
CHCHD3	2	AAANEQLTR	1
		VAEELALEQAK	1
CHCHD4	1	GSDCVDQFR	1
CHD4	3	APEPTPQQVAQQQ	1
		IDGGITGNMR	1
		TEEPMETEPK	1
CHDH	4	EIFAQEALAPFR	1
		MGQPSDPTAVVDPQTR	1
		SANPQDHPVIQPNYLSTETDIEDFR	1
		VLLLEAGPK	1
CHERP	1	LPPPMPPSER	1
CHGA	6	EAVEEPSSK	1
		EDSLEAGLPLQVR	1
		ELQDLALQGAK	1
		GLSAEPGWQAK	1
		SGEATDGARPQALPEPMQESK	1
		SGELEQEEER	1
CHMP1A	2	ALSTMDLQK	1
		MDDTLFQLK	1
CHMP2B	3	ATISDEEIER	1
		SLPSASTSK	1
		TLQTMQNFQK	1
CHMP3	1	IPEIQATMR	1
CHMP4A	4	EAIENATTNAEVLR	1
		FEQQLAQTDGTLSTLEFQR	1
		IQQELQTAK	1
		LPSVPSTHLPAGPAPK	1
CHMP4B	3	EALENANTNTEVLK	1
		GGPTPQEAIQR	1
		IEQELTAAK	1
CHMP4C	2	AAPSPQEALVR	1
		LPNVPSSSLPAQPNR	1
CHP1	1	IPELAINPLGDR	1
CHPT1	1	MAAGAGAGSAPR	1
CHTOP	1	ASMQQQQQLASAR	1
CIAO2A	1	VAAAMENPNLR	1
CIAPIN1	3	EPLTPEEVQSVR	1
		SSPSVKPAVDPAAAK	1
		VLLSDSNLHDA	1
CIB1	3	FCELLPQEQR	1
		LVNCLTGEGEDTR	1
		SPDFASSFK	1
CIRBP	2	DSYDSYATHNE	1
		YGQISEVVVVK	1
CISD2	1	LPVPESITGFAR	1
CKAP4	11	ASVSQVEADLK	1
		DFTSLENTVEER	1
		IETNENNLESAK	1
		LALQALTEK	1
		LEGLGSSEADQDGLASTVR	1
		LPPQDFLDR	1
		QTESLESLLSK	1
		STLQTMESDIYTEVR	1
		SVGELPSTVESLQK	1
		TAVDSLVAYSVK	1
		VQEQVHTLLSQDQAQAAR	1
CKAP5	3	FVTDSNAVVQLK	1
		MQGQSPPAPTR	1
		TEMPCQALVR	1
CKB	9	DLFDPIIEDR	1
		FCTGLTQIETLFK	1
		GFCLPPHCSR	1
		GTGGVDTAAVGGVFDVSNADR	1
		LAVEALSSLDGDLAGR	1
		LEQGQAIDDLMPAQK	1
		LGFSEVELVQMVVDGVK	1
		TDLNPDNLQGGDDLDPNYVLSSR	1
		VLTPELYAELR	1
CKMT1A	3	GTGGVDTAATGGVFDISNLDR	1
		LYPPSAEYPDLR	1
		VVVDALSGLK	1
CKMT2	3	LFPPSADYPDLR	1
		LSEMTEQDQQR	1
		VPPPLPQFGK	1
CLC	1	SLLPVPYTEAASLSTGSTVTIK	1
CLCA1	15	ALGGVNAAR	1
		CSAGITGTNVVK	1
		FPSPLVVYANIR	1
		GCEFVLQSR	1
		IHLTPDFIAGK	1
		ISTSILDLR	1
		LAEYGPQGR	1
		LPAAASGGTSICSGLR	1
		MAYLQIPGIAK	1
		NVAILIPETWK	1
		QSGAIIHTVALGPSAAQELEELSK	1
		RLPAAASGGTSICSGLR	1
		TSSGGSFVASDVPNAPIPDLFPPGQITDLK	1
		TTPMTTQPPNPTFSLLQIGQR	1
		WGVFDEYNNDEK	1
CLCC1	1	SEAAGSPDQGSTYSPAR	1
CLDN3	2	DFYNPVVPEAQK	1
		STGPGASLGTGYDR	1
CLIC1	9	AEEQPQVELFVK	1
		EEFASTCPDDEEIELAYEQVAK	1
		GFTIPEAFR	1
		GVTFNVTTVDTK	1
		IGNCPFSQR	1
		LAALNPESNTAGLDIFAK	1
		LHIVQVVCK	1
		NSNPALNDNLEK	1
		VLDNYLTSPLPEEVDETSAEDEGVSQR	1
CLIC4	3	AGSDGESIGNCPFSQR	1
		DEFTNTCPSDK	1
		FLDGNEMTLADCNLLPK	1
CLIP2	1	TSTGSASSSAAVAASSK	1
CLNS1A	2	GLGTGTLYIAESR	1
		SFPPPGPAEGLLR	1
CLPP	3	EPVEAAPAAEPVPAST	1
		QSLQVIESAMER	1
		YMSPMEAQEFGILDK	1
CLTA	3	LEALDANSR	1
		LQSEPESIR	1
		LQSEPESIRK	1
CLTB	4	LQELDAASK	1
		LTQEPESIR	1
		LTQEPESIRK	1
		VAQLCDFNPK	1
CLTC	18	CNEPAVWSQLAK	1
		DAMQYASESK	1
		ESNCYDPER	1
		EVCFACVDGK	1
		ISGETIFVTAPHEATAGIIGVNR	1
		IYIDSNNNPER	1
		LASTLVHLGEYQAAVDGAR	1
		LHIIEVGTPPTGNQPFPK	1
		LLLPWLEAR	1
		LLYNNVSNFGR	1
		NNLAGAEELFAR	1
		NNRPSEGPLQTR	1
		RPISADSAIMNPASK	1
		SVDPTLALSVYLR	1
		TSIDAYDNFDNISLAQR	1
		VANVELYYR	1
		VIQCFAETGQVQK	1
		VSQPIEGHAASFAQFK	1
CLU	7	ASSIIDELFQDR	1
		EILSVDCSTNNPSQAK	1
		ELDESLQVAER	1
		IDSLLENDR	1
		LFDSDPITVTVPVEVSR	1
		TLLSNLEEAK	1
		VTTVASHTSDSDVPSGVTEVVVK	1
CLUH	2	FNPDIFSPGVR	1
		VVEEPYTVR	1
CLYBL	3	ASLAADIPR	1
		EGAAMGFTGK	1
		VLPSSLMLPK	1
CMA1	3	LMDPQACSHFR	1
		SDAKPPAVFTR	1
		TGVLKPGSDTLQEVK	1
CMAS	4	EEGYDSVFSVVR	1
		EVTEPLNLNPAK	1
		GAATSVSNPR	1
		VGLSGAPADACSTAQK	1
CMPK1	2	EMDQTMAANAQK	1
		NQDNLQGWNK	1
CNBP	1	GFQFVSSSLPDICYR	1
CNDP2	7	EGGSIPVTLTFQEATGK	1
		GNILIPGINEAVAAVTEEEHK	1
		LPDGSEIPLPPILLGR	1
		MMEVAAADVK	1
		TGQEIPVNVR	1
		TVFGVEPDLTR	1
		YPSLSLHGIEGAFSGSGAK	1
CNN1	9	DGIILCEFINK	1
		EWIEGVTGR	1
		FASQQGMTAYGTR	1
		GASQAGMTAPGTK	1
		GMTVYGLPR	1
		GPAYGLSAEVK	1
		IGNNFMDGLK	1
		LGTDQPLDQATISLQMGTNK	1
		NIIGLQMGTNK	1
CNN2	4	AGQCVIGLQMGTNK	1
		CASQSGMTAYGTR	1
		CASQVGMTAPGTR	1
		GLQSGVDIGVK	1
CNN3	5	AGQSVIGLQMGTNK	1
		CASQAGMTAYGTR	1
		DYQYSDQGIDY	1
		GASQAGMLAPGTR	1
		GMSVYGLGR	1
CNOT2	1	EGSGNPTPLINPLAGR	1
CNOT9	2	LTSLGVIGALVK	1
		NLQEGQVTDPR	1
CNP	3	GEEVGELSR	1
		LSPTDNLPR	1
		QFVPGDEPR	1
CNPY2	2	IDSDISGTLK	1
		INPDGSQSVVEVPYAR	1
CNPY3	1	ASPLTHSPPDEL	1
COA4	3	DCMSEQQAR	1
		QCQPQVQAFK	1
		STSVPQGHTWTQR	1
COA6	1	FEAGQFEPSETTAK	1
COASY	1	SGLLVLTTPLASLAPR	1
COG2	2	ALNQLSVPLGQLR	1
		EVTGGAISSEK	1
COG3	1	AEAALLLLPEAAAER	1
COG5	3	IGALQGAVDR	1
		STMPTPGNTAALR	1
		VLTQPSQSAVR	1
COG8	2	GQLAPVFQR	1
		LEPAGPACPEGGR	1
COL12A1	24	ALALGALQNIR	1
		EVTTPPNQR	1
		GDIASQNMMR	1
		GDTTNTVLQGLK	1
		GSPQDLVTK	1
		IIYSPTVGDPIDEYTTVPGR	1
		ITEVTSEGFR	1
		ITVDPTTDGPTK	1
		ITWAPFGSSDK	1
		IVEVFDIGPK	1
		NTFTESAGAR	1
		NVQVYNPTPNSLDVR	1
		QVCEQLISGQMNR	1
		SQDEVEIPAR	1
		TEFNLNQYYQR	1
		TSDPTMSSFR	1
		VGVVQYSSDTR	1
		VILTPMTAGSR	1
		VSDPTTSTMK	1
		VSWDPSPSPVLGYK	1
		VTDETTDSFK	1
		VVYSPVDGTRPSESIVVPGNTR	1
		VYDPSTSTLNVR	1
		WDPAPGPVLQYR	1
COL14A1	22	ASAHAITGPPTELITSEVTAR	1
		DALVSQPTR	1
		DTLFTAESGTR	1
		ESGVELFAIGVK	1
		GDLQSQAMVR	1
		IGILITDGK	1
		IGLAQYSGDPR	1
		ISNVGSNSAR	1
		ITWDPPSSPVK	1
		IVYNNADGTEINEVEVDPITTFPLK	1
		LLVTPTSGGK	1
		LMWIPVYGGK	1
		LQEIEGPSVSIMEK	1
		NLVVGDETTSSLR	1
		QVCEQLIQSHMAR	1
		SQDDIIPPSR	1
		TLFLGVTNLQAK	1
		TLPSSGPQNLR	1
		TNQLNLQNTATK	1
		VTVTPIYTDGEGVSVSAPGK	1
		VVIESLQDR	1
		YTAILNQIPSHSSSIR	1
COL15A1	4	FTGSLQQLTVHPDPR	1
		TADTAVTGLASPLSTGK	1
		TLIPSTFFR	1
		YSLPIVNLK	1
COL16A1	1	GEEGPPGMR	1
COL17A1	1	IVTETVTTR	1
COL18A1	5	ADDILASPPR	1
		AVGLAGTFR	1
		GAPGPAGAR	1
		LQDLYSIVR	1
		TEAPSATGQASSLLGGR	1
COL1A1	19	DGEAGAQGPPGPAGPAGER	1
		GDAGPAGPK	1
		GEAGPQGPR	1
		GESGPSGPAGPTGAR	1
		GETGPAGPAGPVGPVGAR	1
		GFSGLDGAK	1
		GPAGPQGPR	1
		GPPGPMGPPGLAGPPGESGR	1
		GPPGSAGAPGK	1
		GQAGVMGFPGPK	1
		GSEGPQGVR	1
		GVPGPPGAVGPAGK	1
		GVQGPPGPAGPR	1
		GVVGLPGQR	1
		QGPSGASGER	1
		SGDRGETGPAGPAGPVGPVGAR	1
		SLSQQIENIR	1
		STGGISVPGPMGPSGPR	1
		VLCDDVICDETK	1
COL1A2	15	AQPENIPAK	1
		EMATQLAFMR	1
		GASGPAGVR	1
		GDGGPPGMTGFPGAAGR	1
		GEAGAAGPAGPAGPR	1
		GEIGAVGNAGPAGPAGPR	1
		GETGPSGPVGPAGAVGPR	1
		GPAGPSGPAGK	1
		GPAGPSGPAGKDGR	1
		GPPGESGAAGPTGPIGSR	1
		GPSGPQGIR	1
		GVGLGPGPMGLMGPR	1
		GVVGPQGAR	1
		TGHPGTVGPAGIR	1
		VGAPGPAGAR	1
COL3A1	5	DGVPGGPGMR	1
		GEMGPAGIPGAPGLMGAR	1
		GENGLPGENGAPGPMGPR	1
		GPVGPSGPPGK	1
		INTDEIMTSLK	1
COL4A2	4	GAPGVTGPK	1
		GLDGYQGPDGPR	1
		IAVQPGTVGPQGR	1
		SVSIGYLLVK	1
COL4A3	1	ASPFLECHGR	1
COL6A1	17	DAEEAISQTIDTIVDMIK	1
[truncated: 9,034 more rows]
