# Supplementary material
Source: Research Square preprint supplement (doi:10.21203/rs.3.rs-9258373/v1)
Supplement: Supplementary file 3 [file 31a96d936cdc66ef80fb7bfd.xlsx]

## Sheet: Biological-rPSL
Gene	Number of unique peptides	List of Peptides
TIMP1	6	EPGLCTWQSLR
		FVYTPAMESVCGYFHR
		GFQALGDAADIR
		LQSGTHCLWTDQLLQGSEK
		SEEFLIAGK
		TYTVGCEECTVFPCLSIPCK
EGF	2	CINTEGGYVCR
		YACNCVVGYIGER
IL1B	3	GGQDITDFTMQFVSS
		NLYLSCVLK
		SLVMSGPYELK
C1QC	11	DGYDGLPGPK
		DGYDGLPGPKGEPGIPAIPGIR
		FNAVLTNPQGDYDTSTGK
		FNAVLTNPQGDYDTSTGKFTCK
		FQSVFTVTR
		GEPGIPAIPGIR
		GEPGIPAIPGIRGPK
		NGPMGPPGMPGVPGPMGIPGEPGEEGR
		QKFQSVFTVTR
		QTHQPPAPNSLIR
		TNQVNSGGVLLR
CXCL10	3	CTCISISNQPVNPR
		LEIIPASQFCPR
		SLEKLEIIPASQFCPR
TP53	20	ALPNNTSSSPQPK
		CSDSDGLAPPQHLIR
		EEPQSDPSVEPPLSQETFSDLWK
		ELNEALELK
		ELNEALELKDAQAGK
		GEPHHELPPGSTK
		KPLDGEYFTLQIR
		LGFLHSGTAK
		LLPENNVLSPLPSQAMDDLMLSPDDIEQWFTEDPGPDEAPR
		LMFKTEGPDSD
		MEEPQSDPSVEPPLSQETFSDLWK
		MPEAAPPVAPAPAAPTPAAPAPAPSWPLSSSVPSQK
		QSQHMTEVVR
		RALPNNTSSSPQPK
		SVTCTYSPALNK
		SVTCTYSPALNKMFCQLAK
		TCPVQLWVDSTPPPGTR
		TYQGSYGFR
		VEGNLRVEYLDDR
		VEYLDDRNTFR
TYMS	8	AEDFQIEGYNPHPTIK
		DEFPLLTTK
		DFLDSLGFSTR
		DMESDYSGQGVDQLQR
		EEGDLGPVYGFQWR
		IDDFKAEDFQIEGYNPHPTIK
		IIMCAWNPR
		TGTGTLSVFGMQAR
S100A8	4	ALNSIIDVYHK
		KLLETECPQYIR
		LLETECPQYIR
		LLETECPQYIRK
ITGB1	20	CDDLEALKK
		DNTNEIYSGK
		DTCTQECSYFNITK
		FCECDNFNCDR
		GCPPDDIENPR
		GEVFNELVGK
		GICECGVCK
		KGCPPDDIENPR
		LKPEDITQIQPQQLVLR
		LPQPVQPDPVSHCK
		LRNPCTSEQNCTSPFSYK
		LSEGVTISYK
		NVLSLTNKGEVFNELVGK
		SAVTTVVNPK
		SCGECIQAGPNCGWCTNSTFLQEGMPTSAR
		SGEPQTFTLK
		SLGTDLMNEMR
		SNGLICGGNGVCK
		TVMPYISTTPAK
		WDTGENPIYK
S100A9	5	LGHPDTLNQGEFK
		MTCKMSQLER
		NIETIINTFHQYSVK
		TCKMSQLER
		VIEHIMEDLDTNADK
CEACAM5	12	AYVCGIQNSVSANR
		CETQNPVSAR
		INGIPQQHTQVLFIAK
		ITPNNNGTYACFVSNLATGR
		LTIESTPFNVAEGK
		NSGLYTCQANNSASGHSR
		QIIGYVIGTQQATPGPAYSGR
		RSDSVILNVLYGPDAPTISPLNTSYR
		SDLVNEEATGQFR
		SDPVTLDVLYGPDTPIISPPDSSYLSGANLNLSCHSASNPSPQYSWR
		SDSVILNVLYGPDAPTISPLNTSYR
		TITVSAELPK
		TLTLFNVTR
		TLTLLSVTR
ITGAV	57	AGTQLLAGLR
		AMLHLQWPYK
		AQNQGEGAYEAELIVSIPLQADFIGVVR
		ARPVITVNAGLEVYPSILNQDNK
		ASGDFQTTK
		CQPIEFDATGNR
		CQPIEFDATGNRDYAK
		DKLTPITIFMEYR
		DLALSEGDIHTLGCGVAQCLK
		DYAKDDPLEFK
		ENPETEEDVGPVVQHIYELR
		ENQNHSYSLK
		EPVGTCFLQDGTK
		FDLQIQSSNLFDK
		FDLQIQSSNLFDKVSPVVSHK
		FGSAIAPLGDLDQDGFNDIAIAAPYGGEDK
		FGSAIAPLGDLDQDGFNDIAIAAPYGGEDKK
		FSVHQQSEMDTSVK
		GATDIDKNGYPDLIVGAFGVDR
		GGLMQCEELIAYLR
		GIVYIFNGR
		GKSAILYVK
		GSDGKLQEVGQVSVSLQR
		ILACAPLYHWR
		ISSLQTTEK
		ISSLQTTEKNDTVAGQGER
		IYIGDDNPLTLIVK
		KGIVYIFNGR
		KIYIGDDNPLTLIVK
		LEVSVDSDQK
		LEVSVDSDQKK
		LNFQVELLLDK
		LNGFEVFAR
		LQEVGQVSVSLQR
		LTPITIFMEYR
		MFLLVGAPK
		NGYPDLIVGAFGVDR
		NNGPSSFSK
		QAHILLDCGEDNVCK
		QAHILLDCGEDNVCKPK
		QEREPVGTCFLQDGTK
		QVVCDLGNPMK
		RCQPIEFDATGNR
		RDLALSEGDIHTLGCGVAQCLK
		SHQWFGASVR
		SLLWTETFMNK
		SMPPSFGYSMK
		SQDIDADGQGFCQGGFSIDFTK
		SSASFNVIEFPYK
		STGLNAVPSQILEGQWAAR
		TAADTTGLQPILNQFTPANISR
		TAQAIFDDSYLGYSVAVGDFNGDGIDDFVSGVPR
		TCSLPGTALK
		TLGMVYIYDGK
		VDLAVLAAVEIR
		VLLGGPGSFYWQGQLISDQVAEIVSK
		YDPNVYSIK
PFN1	11	CYEMASHLR
		DSLLQDGEFSMDLR
		DSPSVWAAVPGK
		EGVHGGLINK
		SSFYVNGLTLGGQK
		STGGAPTFNVTVTK
		STGGAPTFNVTVTKTDK
		TDKTLVLLMGK
		TFVNITPAEVGVLVGK
		TFVNITPAEVGVLVGKDR
		TKSTGGAPTFNVTVTK
MMP2	31	AFQVWSDVTPLR
		DKPMGPLLVATFWPELPEK
		EYNSCTDTGR
		FPFLFNGKEYNSCTDTGR
		FQGTSYDSCTTEGR
		GEIFFFKDR
		GIQELYGASPDIDLGTGPTPTLGPVTPEICK
		GIQELYGASPDIDLGTGPTPTLGPVTPEICKQDIVFDGIAQIR
		GYPKPLTSLGLPPDVQR
		IDAVYEAPQEEK
		IHDGEADIMINFGR
		IIGYTPDLDPETVDDAFAR
		LIADAWNAIPDNLDAVVDLQGGGHSYFFK
		MWCATTANYDDDR
		MWCATTANYDDDRK
		PLTSLGLPPDVQR
		QDIVFDGIAQIR
		SDGFLWCSTTYNFEK
		SDGFLWCSTTYNFEKDGK
		TYIFAGDKFWR
		VDAAFNWSK
		VKYGNADGEYCK
		WCGTTEDYDR
		WCGTTEDYDRDK
		WDKNQITYR
		WEHGDGYPFDGK
		YESCTSAGR
		YGFCPETAMSTVGGNSEGAPCVFPFTFLGNK
		YGFCPHEALFTMGGNAEGQPCK
		YGNADGEYCK
		YGNADGEYCKFPFLFNGK
MMP3	18	ALKVWEEVTPLTFSR
		CGVPDVGHFR
		DAVDSAVEK
		FLGLEVTGK
		FLGLEVTGKLDSDTLEVMR
		GEDTSMNLVQK
		GEILIFKDR
		GIHTLGFPPTVR
		IDAAISDKEK
		IVNYTPDLPK
		IVNYTPDLPKDAVDSAVEK
		KIDAAISDK
		LDSDTLEVMR
		LEPELHLISSFWPSLPSGVDAAYEVTSK
		LYEGEADIMISFAVR
		NKTYFFVEDK
		NSMEPGFPK
		QIAEDFPGIDSK
		RNSMEPGFPK
		TYFFVEDKYWR
		VWEEVTPLTFSR
MMP9	30	ADSTVMGGNSAGELCVFPFTFLGK
		AFALWSAVTPLTFTR
		AVIDDAFAR
		DADIVIQFGVAEHGDGYPFDGK
		DKLFGFCPTR
		EYSTCTSEGR
		FGNADGAACHFPFIFEGR
		FQTFEGDLK
		FTEGPPLHK
		FTEGPPLHKDDVNGIR
		GKMLLFSGR
		GSRPQGPFLIADK
		LGLGADVAQVTGALR
		LWCATTSNFDSDK
		LWCATTSNFDSDKK
		MFPGVPLDTHDVFQYR
		PCQFPFIFQGQSYSACTTDGR
		PQGPFLIADKWPALPR
		QLAEEYLYR
		QLSLPETGELDSATLK
		QSTLVLFPGDLR
		QVWVYTGASVLGPR
		SDGLPWCSTTANYDTDDR
		SDGLPWCSTTANYDTDDRFGFCPSER
		SELNQVDQVGYVTYDILQCPED
		SLGPALLLLQK
		SYSACTTDGR
		VSSRSELNQVDQVGYVTYDILQCPED
		WCATTANYDR
		WCATTANYDRDK
MUC1	10	DISEMFLQIYK
		EGTINVHDVETQFNQYK
		EGTINVHDVETQFNQYKTEAASR
		KNYGQLDIFPAR
		NYGQLDIFPAR
		QGGFLGLSNIK
		SSVPSSTEK
		VSAGNGGSSLSYTNPAVAATSANL
		YVPPSSTDR
		YVPPSSTDRSPYEK
TIMP2	5	AVSEKEVDSGNDIYGNPIK
		EVDSGNDIYGNPIK
		EVDSGNDIYGNPIKR
		GAAPPKQEFLDIEDP
		SDGSCAWYR
ITGB6	29	CDTPANLLAK
		CECGEDMLSTDSCK
		CPTCGDPCNSK
		CPTCGDPCNSKR
		CVCTNPGASGPTCER
		DGSVSCSLQGENECLITFLITTDNEGK
		DSGNILQLIISAYEELR
		EAPDHPSCSGR
		GCQLNFIENPVSQVEILK
		GDCYCGQCICHLSPYGNIYGPYCQCDNFSCVR
		GLLCGGNGDCDCGECVCR
		HILPLTNDAER
		IGFGSFVEK
		ISANIDTPEGGFDAIMQAAVCK
		ISANIDTPEGGFDAIMQAAVCKEK
		LAGATISEEEDFSK
		LAGATISEEEDFSKDGSVSCSLQGENECLITFLITTDNEGK
		LAGIVIPNDGLCHLDSK
		LGFGSFVEKPVSPFVK
		LIPGATVGLLQK
		LRPGGAQTLQVHVR
		LVQNNVLLIFAVTQEQVHLYENYAK
		NEYSMSTVLEYPTIGQLIDK
		PVGLGDALELLVSPECNCDCQK
		QTEDYPVDLYYLMDLSASMDDDLNTIK
		SCIECHLSAAGQAR
		SGWTGEYCNCTTSTDSCVSEDGVLCSGR
		TIIHSINEK
		TTPEEIANPCSSIPYFCLPTFGFK
		VGDTASFSVTVNIPHCER
BTC	4	CRFVVAEQTPSCVCDEGYIGAR
		FVVAEQTPSCVCDEGYIGAR
		SPETNGLLCGDPEENCAATTTQSK
		SPETNGLLCGDPEENCAATTTQSKR
KRT20	20	CVLQIDNAK
		ESLEHTLEETK
		GTEVQLTELR
		GTEVQLTELRR
		HTVNYGSDLTGGGDLFVGNEK
		IKTVVQEVVDGK
		LASYLEKVR
		LGTTPSVYGGAGGR
		LTVEADLQGLNK
		MAMQNLNDR
		QTAVLQQQVTVNTEELK
		QTAVLQQQVTVNTEELKGTEVQLTELR
		QWYETNAPR
		SLSSSLQAPVVSTVGMQR
		SQIKDAQLQNAR
		TLEQSNSKLEVQIK
		TTEYQLSTLEER
		TVVQEVVDGK
		VFDDLTLHK
		VVSSEVKEVEENI
		YSSQLANLQSLLSSLEAQLMQIR
CXCL12	2	ILNTPNCALQIVAR
		LKWIQEYLEK
CXCR3	3	DSSWSETSEASYSGL
		LNATHCQYNFPQVGR
		RDSSWSETSEASYSGL
KPNA2	6	EKQPPIDNIIR
		LLGASELPIVTPALR
		NITWTLSNLCR
		NPAPPIDAVEQILPTLVR
		NVSSFPDDATSPLQENR
		QPPIDNIIR
		TGVVPQLVK
PTEN	19	ADNDKEYLVLTLTK
		AQEALDFYGEVR
		EDKFMYFEFPQPLPVCGDIK
		EYLVLTLTK
		FMYFEFPQPLPVCGDIK
		IYSSNSGPTR
		IYSSNSGPTRR
		KGVTIPSQR
		LEGVYRNNIDDVVR
		MMFETIPMFSGGTCNPQFVVCQLK
		TAIIKEIVSR
		TGVMICAYLLHR
		TVEEPSNPEASSSTSVTPDVSDNEPDHYR
		VAQYPFEDHNPPQLELIK
		VENGSLCDQEIDSICSIER
		VKIYSSNSGPTR
		YQEDGFDLDLTYIYPNIIAMGFPAER
		YSDTTDSDPENEPFDEDQHTQITK
		YVYYYSYLLK
ELF3	9	ASWLGEQPQFWSK
		CDMDGATLCNCALEELR
		DILIHPELNEGLMK
		EYWDCLEGK
		LVFGPLGDQLHAQLR
		NKYDASAIDFSR
		SEAVAQLWGQK
		TQVLDWISYQVEK
		YDASAIDFSR
SATB1	17	AGISQAVFAR
		AMQNFLQLPEAER
		AMQNFLQLPEAERDR
		DLEESVQDK
		DMNQSSLAK
		ECPLSQSMISSIVNSTYYANVSAAK
		EEDPKTASQSLLVNLR
		FLSLPQPER
		LEDLPPEQWSHTTVR
		LEEELSVEGNTDINTDLK
		LEQNGSPLGR
		LLAQQSLNQQYLNHPPPVSR
		LPPRQPTVASPAESDEENR
		NTNTLFSVK
		QPTVASPAESDEENR
		SLNAASAMGPAPLISTPPSRPPQVK
		SQGWLCELLR
		TASQSLLVNLR
		TLWENLSMIR
		TQGLLSEILR
PLAUR	11	CNEGPILELENLPQNGR
		GNSTHGCSSEETFLIDCR
		GPMNQCLVATGTHEPK
		ITSLTEVVCGLDLCNQGNSGR
		LWEEGEELELVEK
		SGCNHPDLDVQYR
		SPEEQCLDVVTHWIQEGEEGRPK
		SRYLECISCGSSDMSCER
		TNGDCRVEECALGQDLCR
		VEECALGQDLCR
		YLECISCGSSDMSCER
KRT17	5	ASLEGNLAETENR
		ATMQNLNDR
		CEMEQQNQEYK
		EVATNSELVQSGK
		EVATNSELVQSGKSEISELR
		GSSGLGGGSSR
		LASYLDKVR
		LEQEIATYR
		LSGGLGAGSCR
		RVLDELTLAR
		TEELNREVATNSELVQSGK
		TKFETEQALR
		TMQALEIELQSQLSMK
		TRLEQEIATYR
		VLDELTLAR
		YCVQLSQIQGLIGSVEEQLAQLR
MIA	5	GQVVYVFSK
		LCADQECSHPISMAVALQDYMAPDCR
		LFWGGSVQGDYYGDLAAR
		LGYFPSSIVR
		TDKWDFYCQ
MUC16	4	DSLYLNGYNEPGPDEPPTTPK
		LGPYSLDKDSLYLNGYNEPGPDEPPTTPK
		TLTLNFTISNLQYSPDMGK
		VDLLCTYLQPLSGPGLPIK
CDX2	7	AELAATLGLSER
		DVSMYPSSVR
		KAELAATLGLSER
		KPAQQSLGSQVK
		LQQQQQQQPPQPPPPPPQPPQPQPGPLR
		PAQQSLGSQVK
		SVPEPLSPVSSLQASVPGSVPGVLGPTGGVLNPTVTQ
FOXP3	7	ASSVASSDK
		EAPDSLFAVR
		EMVQSLEQQLVLEK
		EMVQSLEQQLVLEKEK
		GSCCIVAAGSQGPVVPAWSGPR
		VFEEPEDFLK
		WAILEAPEK
CPQ	19	AIINLAVYGK
		AIQIMYQNLQQDGLEK
		EEIASCGDVAK
		GEESAVMLEPR
		GKIVVYNQPYINYSR
		IAILGLGSSIGTPPEGITAEVLVVTSFDELQR
		IPTACITVEDAEMMSR
		IVVYNQPYINYSR
		LALLVDTVGPR
		LVLWTAEEQGGVGAFQYYQLHK
		MGAKTYPDTDSFNTVAEITGSK
		SVASFSIYSPHTGIQEYQDGVPK
		TFEEIKEEIASCGDVAK
		TQGAVEAAK
		TQGAVEAAKVGALASLIR
		TVQYRTQGAVEAAK
		TYPDTDSFNTVAEITGSK
		VGALASLIR
		VNISNYSLVMESDAGTFLPTGLQFTGSEK

## Sheet: rPSL
Gene	Number of unique peptides	List of Peptides
TIMP1	6	EPGLCTWQSLR
		FVYTPAMESVCGYFHR
		GFQALGDAADIR
		LQSGTHCLWTDQLLQGSEK
		SEEFLIAGK
		TYTVGCEECTVFPCLSIPCK
EGF	1	YACNCVVGYIGER
IL1B	3	GGQDITDFTMQFVSS
		NLYLSCVLK
		SLVMSGPYELK
C1QC	11	DGYDGLPGPK
		DGYDGLPGPKGEPGIPAIPGIR
		FNAVLTNPQGDYDTSTGK
		FNAVLTNPQGDYDTSTGKFTCK
		FQSVFTVTR
		GEPGIPAIPGIR
		GEPGIPAIPGIRGPK
		NGPMGPPGMPGVPGPMGIPGEPGEEGR
		QKFQSVFTVTR
		QTHQPPAPNSLIR
		TNQVNSGGVLLR
CXCL10	3	CTCISISNQPVNPR
		LEIIPASQFCPR
		SLEKLEIIPASQFCPR
TP53	20	ALPNNTSSSPQPK
		CSDSDGLAPPQHLIR
		EEPQSDPSVEPPLSQETFSDLWK
		ELNEALELK
		ELNEALELKDAQAGK
		GEPHHELPPGSTK
		KPLDGEYFTLQIR
		LGFLHSGTAK
		LLPENNVLSPLPSQAMDDLMLSPDDIEQWFTEDPGPDEAPR
		LMFKTEGPDSD
		MEEPQSDPSVEPPLSQETFSDLWK
		MPEAAPPVAPAPAAPTPAAPAPAPSWPLSSSVPSQK
		QSQHMTEVVR
		RALPNNTSSSPQPK
		SVTCTYSPALNK
		SVTCTYSPALNKMFCQLAK
		TCPVQLWVDSTPPPGTR
		TYQGSYGFR
		VEGNLRVEYLDDR
		VEYLDDRNTFR
TYMS	8	AEDFQIEGYNPHPTIK
		DEFPLLTTK
		DFLDSLGFSTR
		DMESDYSGQGVDQLQR
		EEGDLGPVYGFQWR
		IDDFKAEDFQIEGYNPHPTIK
		IIMCAWNPR
		TGTGTLSVFGMQAR
S100A8	2	ALNSIIDVYHK
		LLETECPQYIR
ITGB1	17	CDDLEALKK
		DNTNEIYSGK
		DTCTQECSYFNITK
		FCECDNFNCDR
		GCPPDDIENPR
		GEVFNELVGK
		GICECGVCK
		KGCPPDDIENPR
		LKPEDITQIQPQQLVLR
		LRNPCTSEQNCTSPFSYK
		NVLSLTNKGEVFNELVGK
		SAVTTVVNPK
		SCGECIQAGPNCGWCTNSTFLQEGMPTSAR
		SGEPQTFTLK
		SNGLICGGNGVCK
		TVMPYISTTPAK
		WDTGENPIYK
S100A9	1	LGHPDTLNQGEFK
CEACAM5	12	AYVCGIQNSVSANR
		CETQNPVSAR
		INGIPQQHTQVLFIAK
		ITPNNNGTYACFVSNLATGR
		NSGLYTCQANNSASGHSR
		QIIGYVIGTQQATPGPAYSGR
		RSDSVILNVLYGPDAPTISPLNTSYR
		SDLVNEEATGQFR
		SDPVTLDVLYGPDTPIISPPDSSYLSGANLNLSCHSASNPSPQYSWR
		SDSVILNVLYGPDAPTISPLNTSYR
		TITVSAELPK
		TLTLFNVTR
ITGAV	58	AGTQLLAGLR
		AMLHLQWPYK
		AQNQGEGAYEAELIVSIPLQADFIGVVR
		ARPVITVNAGLEVYPSILNQDNK
		ASGDFQTTK
		CQPIEFDATGNR
		CQPIEFDATGNRDYAK
		DKLTPITIFMEYR
		DLALSEGDIHTLGCGVAQCLK
		DYAKDDPLEFK
		ENPETEEDVGPVVQHIYELR
		ENQNHSYSLK
		EPVGTCFLQDGTK
		FDLQIQSSNLFDK
		FDLQIQSSNLFDKVSPVVSHK
		FGSAIAPLGDLDQDGFNDIAIAAPYGGEDK
		FGSAIAPLGDLDQDGFNDIAIAAPYGGEDKK
		FSVHQQSEMDTSVK
		GATDIDKNGYPDLIVGAFGVDR
		GGLMQCEELIAYLR
		GGLMQCEELIAYLRDESEFR
		GIVYIFNGR
		GKSAILYVK
		GSDGKLQEVGQVSVSLQR
		ILACAPLYHWR
		ISSLQTTEK
		ISSLQTTEKNDTVAGQGER
		IYIGDDNPLTLIVK
		KGIVYIFNGR
		KIYIGDDNPLTLIVK
		LEVSVDSDQK
		LEVSVDSDQKK
		LNFQVELLLDK
		LNGFEVFAR
		LQEVGQVSVSLQR
		LTPITIFMEYR
		MFLLVGAPK
		NGYPDLIVGAFGVDR
		NNGPSSFSK
		QAHILLDCGEDNVCK
		QAHILLDCGEDNVCKPK
		QEREPVGTCFLQDGTK
		QVVCDLGNPMK
		RCQPIEFDATGNR
		RDLALSEGDIHTLGCGVAQCLK
		SHQWFGASVR
		SLLWTETFMNK
		SMPPSFGYSMK
		SQDIDADGQGFCQGGFSIDFTK
		SSASFNVIEFPYK
		STGLNAVPSQILEGQWAAR
		TAADTTGLQPILNQFTPANISR
		TAQAIFDDSYLGYSVAVGDFNGDGIDDFVSGVPR
		TCSLPGTALK
		TLGMVYIYDGK
		VDLAVLAAVEIR
		VLLGGPGSFYWQGQLISDQVAEIVSK
		YDPNVYSIK
PFN1	10	CYEMASHLR
		DSLLQDGEFSMDLR
		DSPSVWAAVPGK
		SSFYVNGLTLGGQK
		STGGAPTFNVTVTK
		STGGAPTFNVTVTKTDK
		TDKTLVLLMGK
		TFVNITPAEVGVLVGK
		TFVNITPAEVGVLVGKDR
		TKSTGGAPTFNVTVTK
MMP2	31	AFQVWSDVTPLR
		DKPMGPLLVATFWPELPEK
		EYNSCTDTGR
		FPFLFNGKEYNSCTDTGR
		FQGTSYDSCTTEGR
		GEIFFFKDR
		GIQELYGASPDIDLGTGPTPTLGPVTPEICK
		GIQELYGASPDIDLGTGPTPTLGPVTPEICKQDIVFDGIAQIR
		GYPKPLTSLGLPPDVQR
		IDAVYEAPQEEK
		IHDGEADIMINFGR
		IIGYTPDLDPETVDDAFAR
		LIADAWNAIPDNLDAVVDLQGGGHSYFFK
		MWCATTANYDDDR
		MWCATTANYDDDRK
		PLTSLGLPPDVQR
		QDIVFDGIAQIR
		SDGFLWCSTTYNFEK
		SDGFLWCSTTYNFEKDGK
		TYIFAGDKFWR
		VDAAFNWSK
		VKYGNADGEYCK
		WCGTTEDYDR
		WCGTTEDYDRDK
		WDKNQITYR
		WEHGDGYPFDGK
		YESCTSAGR
		YGFCPETAMSTVGGNSEGAPCVFPFTFLGNK
		YGFCPHEALFTMGGNAEGQPCK
		YGNADGEYCK
		YGNADGEYCKFPFLFNGK
MMP3	18	CGVPDVGHFR
		DAVDSAVEK
		FLGLEVTGKLDSDTLEVMR
		GEDTSMNLVQK
		GEILIFKDR
		GIHTLGFPPTVR
		IDAAISDKEK
		IVNYTPDLPK
		IVNYTPDLPKDAVDSAVEK
		KIDAAISDK
		LDSDTLEVMR
		LEPELHLISSFWPSLPSGVDAAYEVTSK
		LYEGEADIMISFAVR
		NKTYFFVEDK
		NSMEPGFPK
		QIAEDFPGIDSK
		RNSMEPGFPK
		TYFFVEDKYWR
MMP9	29	ADSTVMGGNSAGELCVFPFTFLGK
		AFALWSAVTPLTFTR
		AVIDDAFAR
		DADIVIQFGVAEHGDGYPFDGK
		DKLFGFCPTR
		EYSTCTSEGR
		FGNADGAACHFPFIFEGR
		FQTFEGDLK
		FTEGPPLHK
		FTEGPPLHKDDVNGIR
		GSRPQGPFLIADK
		LGLGADVAQVTGALR
		LWCATTSNFDSDK
		LWCATTSNFDSDKK
		MFPGVPLDTHDVFQYR
		PCQFPFIFQGQSYSACTTDGR
		PQGPFLIADKWPALPR
		QLAEEYLYR
		QLSLPETGELDSATLK
		QSTLVLFPGDLR
		QVWVYTGASVLGPR
		SDGLPWCSTTANYDTDDR
		SDGLPWCSTTANYDTDDRFGFCPSER
		SELNQVDQVGYVTYDILQCPED
		SLGPALLLLQK
		SYSACTTDGR
		VSSRSELNQVDQVGYVTYDILQCPED
		WCATTANYDR
		WCATTANYDRDK
MUC1	10	DISEMFLQIYK
		EGTINVHDVETQFNQYK
		EGTINVHDVETQFNQYKTEAASR
		KNYGQLDIFPAR
		NYGQLDIFPAR
		QGGFLGLSNIK
		SSVPSSTEK
		VSAGNGGSSLSYTNPAVAATSANL
		YVPPSSTDR
		YVPPSSTDRSPYEK
TIMP2	4	AVSEKEVDSGNDIYGNPIK
		EVDSGNDIYGNPIK
		EVDSGNDIYGNPIKR
		SDGSCAWYR
ITGB6	29	CDTPANLLAK
		CECGEDMLSTDSCK
		CPTCGDPCNSK
		CPTCGDPCNSKR
		CVCTNPGASGPTCER
		DGSVSCSLQGENECLITFLITTDNEGK
		DSGNILQLIISAYEELR
		EAPDHPSCSGR
		GCQLNFIENPVSQVEILK
		GDCYCGQCICHLSPYGNIYGPYCQCDNFSCVR
		GLLCGGNGDCDCGECVCR
		HILPLTNDAER
		ISANIDTPEGGFDAIMQAAVCK
		ISANIDTPEGGFDAIMQAAVCKEK
		LAGATISEEEDFSK
		LAGATISEEEDFSKDGSVSCSLQGENECLITFLITTDNEGK
		LAGIVIPNDGLCHLDSK
		LGFGSFVEKPVSPFVK
		LIPGATVGLLQK
		LRPGGAQTLQVHVR
		LVQNNVLLIFAVTQEQVHLYENYAK
		NEYSMSTVLEYPTIGQLIDK
		PVGLGDALELLVSPECNCDCQK
		QTEDYPVDLYYLMDLSASMDDDLNTIK
		SCIECHLSAAGQAR
		SGWTGEYCNCTTSTDSCVSEDGVLCSGR
		TIIHSINEK
		TTPEEIANPCSSIPYFCLPTFGFK
		VGDTASFSVTVNIPHCER
BTC	4	CRFVVAEQTPSCVCDEGYIGAR
		FVVAEQTPSCVCDEGYIGAR
		SPETNGLLCGDPEENCAATTTQSK
		SPETNGLLCGDPEENCAATTTQSKR
KRT20	20	CVLQIDNAK
		ESLEHTLEETK
		GTEVQLTELR
		GTEVQLTELRR
		HTVNYGSDLTGGGDLFVGNEK
		IKTVVQEVVDGK
		LGTTPSVYGGAGGR
		LTVEADLQGLNK
		MAMQNLNDR
		QTAVLQQQVTVNTEELK
		QTAVLQQQVTVNTEELKGTEVQLTELR
		QWYETNAPR
		SLSSSLQAPVVSTVGMQR
		SQIKDAQLQNAR
		TLEQSNSKLEVQIK
		TTEYQLSTLEER
		TVVQEVVDGK
		VFDDLTLHK
		VVSSEVKEVEENI
		YSSQLANLQSLLSSLEAQLMQIR
CXCL12	2	ILNTPNCALQIVAR
		LKWIQEYLEK
CXCR3	3	DSSWSETSEASYSGL
		LNATHCQYNFPQVGR
		RDSSWSETSEASYSGL
KPNA2	3	LLGASELPIVTPALR
		NPAPPIDAVEQILPTLVR
		TGVVPQLVK
PTEN	19	ADNDKEYLVLTLTK
		AQEALDFYGEVR
		EDKFMYFEFPQPLPVCGDIK
		EYLVLTLTK
		FMYFEFPQPLPVCGDIK
		IYSSNSGPTR
		IYSSNSGPTRR
		KGVTIPSQR
		LEGVYRNNIDDVVR
		MMFETIPMFSGGTCNPQFVVCQLK
		TAIIKEIVSR
		TGVMICAYLLHR
		TVEEPSNPEASSSTSVTPDVSDNEPDHYR
		VAQYPFEDHNPPQLELIK
		VENGSLCDQEIDSICSIER
		VKIYSSNSGPTR
		YQEDGFDLDLTYIYPNIIAMGFPAER
		YSDTTDSDPENEPFDEDQHTQITK
		YVYYYSYLLK
ELF3	8	ASWLGEQPQFWSK
		CDMDGATLCNCALEELR
		DILIHPELNEGLMK
		EYWDCLEGK
		NKYDASAIDFSR
		SEAVAQLWGQK
		TQVLDWISYQVEK
		YDASAIDFSR
SATB1	17	AGISQAVFAR
		AMQNFLQLPEAER
		AMQNFLQLPEAERDR
		DLEESVQDK
		DMNQSSLAK
		ECPLSQSMISSIVNSTYYANVSAAK
		EEDPKTASQSLLVNLR
		FLSLPQPER
		LEDLPPEQWSHTTVR
		LEEELSVEGNTDINTDLK
		LEQNGSPLGR
		LLAQQSLNQQYLNHPPPVSR
		LPPRQPTVASPAESDEENR
		NTNTLFSVK
		QPTVASPAESDEENR
		SLNAASAMGPAPLISTPPSRPPQVK
		TLWENLSMIR
PLAUR	11	CNEGPILELENLPQNGR
		GNSTHGCSSEETFLIDCR
		GPMNQCLVATGTHEPK
		ITSLTEVVCGLDLCNQGNSGR
		LWEEGEELELVEK
		SGCNHPDLDVQYR
		SPEEQCLDVVTHWIQEGEEGRPK
		SRYLECISCGSSDMSCER
		TNGDCRVEECALGQDLCR
		VEECALGQDLCR
		YLECISCGSSDMSCER
KRT17	3	ASLEGNLAETENR
		TMQALEIELQSQLSMK
		YCVQLSQIQGLIGSVEEQLAQLR
MIA	5	GQVVYVFSK
		LCADQECSHPISMAVALQDYMAPDCR
		LFWGGSVQGDYYGDLAAR
		LGYFPSSIVR
		TDKWDFYCQ
MUC16	4	DSLYLNGYNEPGPDEPPTTPK
		LGPYSLDKDSLYLNGYNEPGPDEPPTTPK
		TLTLNFTISNLQYSPDMGK
		VDLLCTYLQPLSGPGLPIK
CDX2	7	AELAATLGLSER
		DVSMYPSSVR
		KAELAATLGLSER
		KPAQQSLGSQVK
		LQQQQQQQPPQPPPPPPQPPQPQPGPLR
		PAQQSLGSQVK
		SVPEPLSPVSSLQASVPGSVPGVLGPTGGVLNPTVTQ
FOXP3	7	ASSVASSDK
		EAPDSLFAVR
		EMVQSLEQQLVLEK
		EMVQSLEQQLVLEKEK
		GSCCIVAAGSQGPVVPAWSGPR
		VFEEPEDFLK
		WAILEAPEK
CPQ	19	AIINLAVYGK
		AIQIMYQNLQQDGLEK
		EEIASCGDVAK
		GEESAVMLEPR
		GKIVVYNQPYINYSR
		IAILGLGSSIGTPPEGITAEVLVVTSFDELQR
		IPTACITVEDAEMMSR
		IVVYNQPYINYSR
		LALLVDTVGPR
		LVLWTAEEQGGVGAFQYYQLHK
		MGAKTYPDTDSFNTVAEITGSK
		SVASFSIYSPHTGIQEYQDGVPK
		TFEEIKEEIASCGDVAK
		TQGAVEAAK
		TQGAVEAAKVGALASLIR
		TVQYRTQGAVEAAK
		TYPDTDSFNTVAEITGSK
		VGALASLIR
		VNISNYSLVMESDAGTFLPTGLQFTGSEK

## Sheet: Biological Sample Library
Gene	Number of unique peptides	List of Peptides
TIMP1	4	EPGLCTWQSLR
		GFQALGDAADIR
		SEEFLIAGK
		TYTVGCEECTVFPCLSIPCK
C1QC	4	FNAVLTNPQGDYDTSTGK
		FQSVFTVTR
		QTHQPPAPNSLIR
		TNQVNSGGVLLR
TP53	3	ALPNNTSSSPQPK
		ELNEALELK
		SVTCTYSPALNK
S100A8	4	ALNSIIDVYHK
		KLLETECPQYIR
		LLETECPQYIR
		LLETECPQYIRK
ITGB1	14	CDDLEALKK
		DNTNEIYSGK
		FCECDNFNCDR
		GCPPDDIENPR
		GEVFNELVGK
		GICECGVCK
		LKPEDITQIQPQQLVLR
		LPQPVQPDPVSHCK
		LSEGVTISYK
		SAVTTVVNPK
		SGEPQTFTLK
		SLGTDLMNEMR
		TVMPYISTTPAK
		WDTGENPIYK
S100A9	5	LGHPDTLNQGEFK
		MTCKMSQLER
		NIETIINTFHQYSVK
		TCKMSQLER
		VIEHIMEDLDTNADK
CEACAM5	9	AYVCGIQNSVSANR
		CETQNPVSAR
		INGIPQQHTQVLFIAK
		ITPNNNGTYACFVSNLATGR
		QIIGYVIGTQQATPGPAYSGR
		RSDSVILNVLYGPDAPTISPLNTSYR
		SDLVNEEATGQFR
		TITVSAELPK
		TLTLFNVTR
ITGAV	13	AGTQLLAGLR
		CQPIEFDATGNR
		EPVGTCFLQDGTK
		FSVHQQSEMDTSVK
		ISSLQTTEK
		LNGFEVFAR
		LQEVGQVSVSLQR
		MFLLVGAPK
		QVVCDLGNPMK
		SSASFNVIEFPYK
		TCSLPGTALK
		TLGMVYIYDGK
		YDPNVYSIK
PFN1	10	CYEMASHLR
		DSLLQDGEFSMDLR
		DSPSVWAAVPGK
		EGVHGGLINK
		SSFYVNGLTLGGQK
		STGGAPTFNVTVTK
		STGGAPTFNVTVTKTDK
		TDKTLVLLMGK
		TFVNITPAEVGVLVGK
		TFVNITPAEVGVLVGKDR
MMP9	9	AVIDDAFAR
		DKLFGFCPTR
		FQTFEGDLK
		GKMLLFSGR
		QLAEEYLYR
		QLSLPETGELDSATLK
		QSTLVLFPGDLR
		SLGPALLLLQK
		SYSACTTDGR
MUC1	6	DISEMFLQIYK
		EGTINVHDVETQFNQYK
		NYGQLDIFPAR
		QGGFLGLSNIK
		VSAGNGGSSLSYTNPAVAATSANL
		YVPPSSTDR
TIMP2	4	EVDSGNDIYGNPIK
		EVDSGNDIYGNPIKR
		GAAPPKQEFLDIEDP
		SDGSCAWYR
KRT20	11	CVLQIDNAK
		GTEVQLTELR
		GTEVQLTELRR
		LGTTPSVYGGAGGR
		LTVEADLQGLNK
		MAMQNLNDR
		SLSSSLQAPVVSTVGMQR
		SQIKDAQLQNAR
		TTEYQLSTLEER
		TVVQEVVDGK
		VFDDLTLHK
KPNA2	5	EKQPPIDNIIR
		LLGASELPIVTPALR
		NVSSFPDDATSPLQENR
		QPPIDNIIR
		TGVVPQLVK
ELF3	2	LVFGPLGDQLHAQLR
		YDASAIDFSR
SATB1	1	FLSLPQPER
KRT17	2	GSSGLGGGSSR
		LSGGLGAGSCR
CPQ	3	LALLVDTVGPR
		TYPDTDSFNTVAEITGSK
		VGALASLIR
