# Supplementary material
Source: Research Square preprint supplement (doi:10.21203/rs.3.rs-9258373/v1)
Supplement: Supplementary file 4 [file 4ba13a8a99afd38ae11a7131.xlsx]

## Sheet: Biological-rPSL DIA-MS
Gene	Number of unique peptides	Peptide	Proteotypicity
BTC	1	FVVAEQTPSCVCDEGYIGAR	1
C1QC	4	FQSVFTVTR	1
		GEPGIPAIPGIR	1
		QKFQSVFTVTR	1
		TNQVNSGGVLLR	1
CDX2	1	KAELAATLGLSER	1
CEACAM5	7	AYVCGIQNSVSANR	1
		CETQNPVSAR	1
		INGIPQQHTQVLFIAK	1
		ITPNNNGTYACFVSNLATGR	1
		QIIGYVIGTQQATPGPAYSGR	1
		SDLVNEEATGQFR	1
		TLTLFNVTR	1
CPQ	6	AIINLAVYGK	1
		GEESAVMLEPR	1
		IVVYNQPYINYSR	1
		LALLVDTVGPR	1
		LVLWTAEEQGGVGAFQYYQLHK	1
		VGALASLIR	1
CXCL10	2	LEIIPASQFCPR	1
		SLEKLEIIPASQFCPR	1
CXCL12	1	LKWIQEYLEK	1
CXCR3	1	LNATHCQYNFPQVGR	1
EGF	1	YACNCVVGYIGER	1
ELF3	2	LVFGPLGDQLHAQLR	1
		TQVLDWISYQVEK	1
IL1B	2	NLYLSCVLK	1
		SLVMSGPYELK	1
ITGAV	23	AMLHLQWPYK	1
		ASGDFQTTK	1
		CQPIEFDATGNR	1
		DKLTPITIFMEYR	1
		GGLMQCEELIAYLR	1
		ILACAPLYHWR	1
		IYIGDDNPLTLIVK	1
		LEVSVDSDQK	1
		LNGFEVFAR	1
		LQEVGQVSVSLQR	1
		LTPITIFMEYR	1
		MFLLVGAPK	1
		QVVCDLGNPMK	1
		SHQWFGASVR	1
		SLLWTETFMNK	1
		SMPPSFGYSMK	1
		SSASFNVIEFPYK	1
		TAADTTGLQPILNQFTPANISR	1
		TCSLPGTALK	1
		TLGMVYIYDGK	1
		VDLAVLAAVEIR	1
		VLLGGPGSFYWQGQLISDQVAEIVSK	1
		YDPNVYSIK	1
ITGB1	12	DNTNEIYSGK	1
		FCECDNFNCDR	1
		GCPPDDIENPR	1
		GEVFNELVGK	1
		GICECGVCK	1
		IGFGSFVEK	1
		LKPEDITQIQPQQLVLR	1
		SAVTTVVNPK	1
		SGEPQTFTLK	1
		SLGTDLMNEMR	1
		TVMPYISTTPAK	1
		WDTGENPIYK	1
ITGB6	3	DSGNILQLIISAYEELR	1
		HILPLTNDAER	1
		LGFGSFVEKPVSPFVK	1
KPNA2	2	EKQPPIDNIIR	1
		LLGASELPIVTPALR	1
KRT17	2	TMQALEIELQSQLSMK	1
		YCVQLSQIQGLIGSVEEQLAQLR	1
KRT20	13	CVLQIDNAK	1
		ESLEHTLEETK	1
		GTEVQLTELR	1
		GTEVQLTELRR	1
		LGTTPSVYGGAGGR	1
		LTVEADLQGLNK	1
		MAMQNLNDR	1
		QWYETNAPR	1
		SLSSSLQAPVVSTVGMQR	1
		TTEYQLSTLEER	1
		TVVQEVVDGK	1
		VFDDLTLHK	1
		VVSSEVKEVEENI	1
MIA	3	GQVVYVFSK	1
		LGYFPSSIVR	1
		TDKWDFYCQ	1
MMP2	4	AFQVWSDVTPLR	1
		FQGTSYDSCTTEGR	1
		QDIVFDGIAQIR	1
		YGNADGEYCKFPFLFNGK	1
MMP3	4	GIHTLGFPPTVR	1
		LYEGEADIMISFAVR	1
		RNSMEPGFPK	1
		TYFFVEDKYWR	1
MMP9	12	AFALWSAVTPLTFTR	1
		AVIDDAFAR	1
		EYSTCTSEGR	1
		FGNADGAACHFPFIFEGR	1
		FQTFEGDLK	1
		LGLGADVAQVTGALR	1
		MFPGVPLDTHDVFQYR	1
		QLSLPETGELDSATLK	1
		QSTLVLFPGDLR	1
		SDGLPWCSTTANYDTDDRFGFCPSER	1
		SLGPALLLLQK	1
		SYSACTTDGR	1
MUC1	4	DISEMFLQIYK	1
		NYGQLDIFPAR	1
		QGGFLGLSNIK	1
		YVPPSSTDR	1
MUC16	1	TLTLNFTISNLQYSPDMGK	1
PFN1	9	CYEMASHLR	1
		DSLLQDGEFSMDLR	1
		DSPSVWAAVPGK	1
		EGVHGGLINK	1
		SSFYVNGLTLGGQK	1
		STGGAPTFNVTVTK	1
		TDKTLVLLMGK	1
		TFVNITPAEVGVLVGK	1
		TFVNITPAEVGVLVGKDR	1
PLAUR	1	SPEEQCLDVVTHWIQEGEEGRPK	1
PTEN	2	TGVMICAYLLHR	1
		YVYYYSYLLK	1
S100A8	3	ALNSIIDVYHK	1
		KLLETECPQYIR	1
		LLETECPQYIR	1
S100A9	3	LGHPDTLNQGEFK	1
		NIETIINTFHQYSVK	1
		VIEHIMEDLDTNADK	1
SATB1	3	AMQNFLQLPEAER	1
		FLSLPQPER	1
		TLWENLSMIR	1
TIMP1	3	EPGLCTWQSLR	1
		GFQALGDAADIR	1
		SEEFLIAGK	1
TIMP2	1	GAAPPKQEFLDIEDP	1
TP53	3	ALPNNTSSSPQPK	1
		KPLDGEYFTLQIR	1
		QSQHMTEVVR	1
TYMS	1	EEGDLGPVYGFQWR	1

## Sheet: rPSL DIA-MS
Gene	Number of unique peptides	Peptide	Proteotypicity
C1QC	2	FQSVFTVTR	1
		TNQVNSGGVLLR	1
CPQ	5	GEESAVMLEPR	1
		IVVYNQPYINYSR	1
		LALLVDTVGPR	1
		LVLWTAEEQGGVGAFQYYQLHK	1
		VGALASLIR	1
CDX2	1	KAELAATLGLSER	1
CEACAM5	7	AYVCGIQNSVSANR	1
		CETQNPVSAR	1
		INGIPQQHTQVLFIAK	1
		QIIGYVIGTQQATPGPAYSGR	1
		SDLVNEEATGQFR	1
		SDPVTLDVLYGPDTPIISPPDSSYLSGANLNLSCHSASNPSPQYSWR	1
		TLTLFNVTR	1
CXCL10	1	SLEKLEIIPASQFCPR	1
EGF	1	YACNCVVGYIGER	1
ELF3	2	ASWLGEQPQFWSK	1
		TQVLDWISYQVEK	1
FOXP3	1	EAPDSLFAVR	1
ITGAV	23	AGTQLLAGLR	1
		AMLHLQWPYK	1
		ASGDFQTTK	1
		CQPIEFDATGNR	1
		DKLTPITIFMEYR	1
		GATDIDKNGYPDLIVGAFGVDR	1
		GGLMQCEELIAYLR	1
		GGLMQCEELIAYLRDESEFR	1
		ILACAPLYHWR	1
		IYIGDDNPLTLIVK	1
		KGIVYIFNGR	1
		LEVSVDSDQK	1
		LNGFEVFAR	1
		LTPITIFMEYR	1
		MFLLVGAPK	1
		NGYPDLIVGAFGVDR	1
		SHQWFGASVR	1
		SMPPSFGYSMK	1
		SSASFNVIEFPYK	1
		TCSLPGTALK	1
		VDLAVLAAVEIR	1
		VLLGGPGSFYWQGQLISDQVAEIVSK	1
		YDPNVYSIK	1
ITGB1	12	CDDLEALKK	1
		DNTNEIYSGK	1
		FCECDNFNCDR	1
		GCPPDDIENPR	1
		GEVFNELVGK	1
		GICECGVCK	1
		IGFGSFVEK	1
		LKPEDITQIQPQQLVLR	1
		NVLSLTNKGEVFNELVGK	1
		SAVTTVVNPK	1
		SGEPQTFTLK	1
		TVMPYISTTPAK	1
ITGB6	5	DSGNILQLIISAYEELR	1
		HILPLTNDAER	1
		LGFGSFVEKPVSPFVK	1
		TTPEEIANPCSSIPYFCLPTFGFK	1
		VGDTASFSVTVNIPHCER	1
KRT17	2	TMQALEIELQSQLSMK	1
		YCVQLSQIQGLIGSVEEQLAQLR	1
KRT20	12	CVLQIDNAK	1
		ESLEHTLEETK	1
		GTEVQLTELR	1
		GTEVQLTELRR	1
		LGTTPSVYGGAGGR	1
		MAMQNLNDR	1
		QWYETNAPR	1
		SLSSSLQAPVVSTVGMQR	1
		TTEYQLSTLEER	1
		TVVQEVVDGK	1
		VFDDLTLHK	1
		VVSSEVKEVEENI	1
MIA	3	GQVVYVFSK	1
		LGYFPSSIVR	1
		TDKWDFYCQ	1
MMP2	4	FQGTSYDSCTTEGR	1
		LIADAWNAIPDNLDAVVDLQGGGHSYFFK	1
		QDIVFDGIAQIR	1
		VDAAFNWSK	1
MMP3	8	DAVDSAVEK	1
		FLGLEVTGKLDSDTLEVMR	1
		GEDTSMNLVQK	1
		IVNYTPDLPK	1
		LDSDTLEVMR	1
		NSMEPGFPK	1
		QIAEDFPGIDSK	1
		TYFFVEDKYWR	1
MMP9	13	AFALWSAVTPLTFTR	1
		AVIDDAFAR	1
		DADIVIQFGVAEHGDGYPFDGK	1
		EYSTCTSEGR	1
		FGNADGAACHFPFIFEGR	1
		FQTFEGDLK	1
		LGLGADVAQVTGALR	1
		MFPGVPLDTHDVFQYR	1
		QLAEEYLYR	1
		QSTLVLFPGDLR	1
		SDGLPWCSTTANYDTDDRFGFCPSER	1
		SLGPALLLLQK	1
		SYSACTTDGR	1
MUC16	1	TLTLNFTISNLQYSPDMGK	1
MUC1	4	DISEMFLQIYK	1
		NYGQLDIFPAR	1
		QGGFLGLSNIK	1
		YVPPSSTDR	1
TP53	3	LLPENNVLSPLPSQAMDDLMLSPDDIEQWFTEDPGPDEAPR	1
		QSQHMTEVVR	1
		VEYLDDRNTFR	1
PFN1	8	DSLLQDGEFSMDLR	1
		DSPSVWAAVPGK	1
		SSFYVNGLTLGGQK	1
		STGGAPTFNVTVTK	1
		TDKTLVLLMGK	1
		TFVNITPAEVGVLVGK	1
		TFVNITPAEVGVLVGKDR	1
		TKSTGGAPTFNVTVTK	1
PTEN	4	ADNDKEYLVLTLTK	1
		IYSSNSGPTR	1
		TGVMICAYLLHR	1
		YVYYYSYLLK	1
S100A8	2	ALNSIIDVYHK	1
		LLETECPQYIR	1
SATB1	3	AMQNFLQLPEAER	1
		EEDPKTASQSLLVNLR	1
		TLWENLSMIR	1
TIMP1	4	EPGLCTWQSLR	1
		FVYTPAMESVCGYFHR	1
		GFQALGDAADIR	1
		SEEFLIAGK	1
TYMS	1	EEGDLGPVYGFQWR	1
PLAUR	3	ITSLTEVVCGLDLCNQGNSGR	1
		SPEEQCLDVVTHWIQEGEEGRPK	1
		VEECALGQDLCR	1

## Sheet: Biological-Library DIA-MS
Gene	Number of unique peptides	Peptide	Proteotypicity
C1QC	3	FQSVFTVTR	1
		QTHQPPAPNSLIR	1
		TNQVNSGGVLLR	1
CEACAM5	8	AYVCGIQNSVSANR	1
		CETQNPVSAR	1
		INGIPQQHTQVLFIAK	1
		ITPNNNGTYACFVSNLATGR	1
		QIIGYVIGTQQATPGPAYSGR	1
		RSDSVILNVLYGPDAPTISPLNTSYR	1
		SDLVNEEATGQFR	1
		TLTLFNVTR	1
CPQ	2	LALLVDTVGPR	1
		VGALASLIR	1
ELF3	1	LVFGPLGDQLHAQLR	1
ITGAV	10	AGTQLLAGLR	1
		CQPIEFDATGNR	1
		ISSLQTTEK	1
		LNGFEVFAR	1
		MFLLVGAPK	1
		QVVCDLGNPMK	1
		SSASFNVIEFPYK	1
		TCSLPGTALK	1
		TLGMVYIYDGK	1
		YDPNVYSIK	1
ITGB1	11	DNTNEIYSGK	1
		FCECDNFNCDR	1
		GCPPDDIENPR	1
		GEVFNELVGK	1
		GICECGVCK	1
		IGFGSFVEK	1
		LKPEDITQIQPQQLVLR	1
		SAVTTVVNPK	1
		SGEPQTFTLK	1
		SLGTDLMNEMR	1
		TVMPYISTTPAK	1
KPNA2	3	EKQPPIDNIIR	1
		LLGASELPIVTPALR	1
		QPPIDNIIR	1
KRT20	10	CVLQIDNAK	1
		GTEVQLTELR	1
		GTEVQLTELRR	1
		LGTTPSVYGGAGGR	1
		LTVEADLQGLNK	1
		MAMQNLNDR	1
		SLSSSLQAPVVSTVGMQR	1
		TTEYQLSTLEER	1
		TVVQEVVDGK	1
		VFDDLTLHK	1
MMP9	9	AVIDDAFAR	1
		DKLFGFCPTR	1
		FQTFEGDLK	1
		GKMLLFSGR	1
		QLAEEYLYR	1
		QLSLPETGELDSATLK	1
		QSTLVLFPGDLR	1
		SLGPALLLLQK	1
		SYSACTTDGR	1
MUC1	5	DISEMFLQIYK	1
		NYGQLDIFPAR	1
		QGGFLGLSNIK	1
		VSAGNGGSSLSYTNPAVAATSANL	1
		YVPPSSTDR	1
PFN1	9	CYEMASHLR	1
		DSLLQDGEFSMDLR	1
		DSPSVWAAVPGK	1
		EGVHGGLINK	1
		SSFYVNGLTLGGQK	1
		STGGAPTFNVTVTK	1
		TDKTLVLLMGK	1
		TFVNITPAEVGVLVGK	1
		TFVNITPAEVGVLVGKDR	1
S100A8	3	ALNSIIDVYHK	1
		KLLETECPQYIR	1
		LLETECPQYIR	1
S100A9	3	LGHPDTLNQGEFK	1
		NIETIINTFHQYSVK	1
		VIEHIMEDLDTNADK	1
SATB1	1	FLSLPQPER	1
TIMP1	3	EPGLCTWQSLR	1
		GFQALGDAADIR	1
		SEEFLIAGK	1
TP53	1	ALPNNTSSSPQPK	1

## Sheet: Library-free DIA-MS
Gene	Number of unique peptides	Peptide	Proteotypicity
C1QC	2	FQSVFTVTR	1
		TNQVNSGGVLLR	1
CEACAM5	5	AYVCGIQNSVSANR	1
		CETQNPVSAR	1
		QIIGYVIGTQQATPGPAYSGR	1
		SDLVNEEATGQFR	1
		TLTLFNVTR	1
CPQ	5	GEESAVMLEPR	1
		IVVYNQPYINYSR	1
		LALLVDTVGPR	1
		LVLWTAEEQGGVGAFQYYQLHK	1
		VGALASLIR	1
CXCL10	1	SLEKLEIIPASQFCPR	1
EGF	1	YACNCVVGYIGER	1
ELF3	1	ASWLGEQPQFWSK	1
ITGAV	7	IYIGDDNPLTLIVK	1
		LTPITIFMEYR	1
		MFLLVGAPK	1
		SSASFNVIEFPYK	1
		VDLAVLAAVEIR	1
		VLLGGPGSFYWQGQLISDQVAEIVSK	1
		YDPNVYSIK	1
ITGB1	10	DNTNEIYSGK	1
		FCECDNFNCDR	1
		GCPPDDIENPR	1
		GEVFNELVGK	1
		GICECGVCK	1
		IGFGSFVEK	1
		SAVTTVVNPK	1
		SGEPQTFTLK	1
		SLGTDLMNEMR	1
		TVMPYISTTPAK	1
ITGB6	2	DSGNILQLIISAYEELR	1
		LGFGSFVEKPVSPFVK	1
KRT20	11	CVLQIDNAK	1
		GTEVQLTELR	1
		LGTTPSVYGGAGGR	1
		LTVEADLQGLNK	1
		MAMQNLNDR	1
		QWYETNAPR	1
		SLSSSLQAPVVSTVGMQR	1
		TTEYQLSTLEER	1
		TVVQEVVDGK	1
		VFDDLTLHK	1
		VVSSEVKEVEENI	1
MIA	2	LGYFPSSIVR	1
		TDKWDFYCQ	1
MMP3	1	TYFFVEDKYWR	1
MMP9	12	AFALWSAVTPLTFTR	1
		AVIDDAFAR	1
		EYSTCTSEGR	1
		FGNADGAACHFPFIFEGR	1
		FQTFEGDLK	1
		MFPGVPLDTHDVFQYR	1
		QLAEEYLYR	1
		QLSLPETGELDSATLK	1
		QSTLVLFPGDLR	1
		SDGLPWCSTTANYDTDDRFGFCPSER	1
		SLGPALLLLQK	1
		SYSACTTDGR	1
MUC1	3	DISEMFLQIYK	1
		QGGFLGLSNIK	1
		YVPPSSTDR	1
PFN1	7	DSLLQDGEFSMDLR	1
		DSPSVWAAVPGK	1
		STGGAPTFNVTVTK	1
		TDKTLVLLMGK	1
		TFVNITPAEVGVLVGK	1
		TFVNITPAEVGVLVGKDR	1
		TKSTGGAPTFNVTVTK	1
PTEN	1	YVYYYSYLLK	1
S100A8	2	ALNSIIDVYHK	1
		LLETECPQYIR	1
S100A9	3	LGHPDTLNQGEFK	1
		NIETIINTFHQYSVK	1
		VIEHIMEDLDTNADK	1
TIMP1	4	EPGLCTWQSLR	1
		FVYTPAMESVCGYFHR	1
		GFQALGDAADIR	1
		SEEFLIAGK	1
TP53	1	MPEAAPPVAPAPAAPTPAAPAPAPSWPLSSSVPSQK	1
TYMS	2	EEGDLGPVYGFQWR	1
		YSLRDEFPLLTTK	1
