# Supplementary material
Source: Research Square preprint supplement (doi:10.21203/rs.3.rs-9258373/v1)
Supplement: Supplementary file 5 [file 5968b62e281c75fc7495c7f4.xlsx]

## Sheet: Fragpipe
ProteinId	Gene	Total Number of peptides identified	Number of unique peptides identified	Peptide Sequence	Proteotypic
A0A075B6H7	IGKV3-7	2	1	EIVMTQSPPTLSLSPGER	TRUE
				LLIYGASTR	FALSE
A0A075B6H9	IGLV4-69	1	1	FSGSSSGAER	TRUE
A0A075B6I0	IGLV8-61	2	2	FSGSILGNK	TRUE
				TLIYSTNTR	TRUE
A0A075B6I9	IGLV7-46	1	1	TLIYDTSNK	TRUE
A0A075B6J1	IGLV5-37	1	0	GQGSGVPSR	FALSE
A0A075B6J9	IGLV2-18	1	1	VSWYQQPPGTAPK	TRUE
A0A075B6K0	IGLV3-16	2	1	DSERPSGIPER	FALSE
				ITCSGEALPK	TRUE
A0A075B6K4	IGLV3-10	2	1	ITCSGDALPK	FALSE
				SGQAPVLVIYEDSK	TRUE
A0A075B6K5	IGLV3-9	3	1	DSNRPSGIPER	TRUE
				FSGSNSGNTATLTISR	FALSE
				ITCGGNNIGSK	FALSE
A0A075B6R9	IGKV2D-24	1	0	FSGSGAGTDFTLK	FALSE
A0A075B6S2	IGKV2D-29	2	0	FSGSGSGTDFTLK	FALSE
				SSQSLLHSDGK	FALSE
A0A0A0MRZ8	IGKV3D-11	1	0	LLIYDASNR	FALSE
A0A0A0MS14	IGHV1-45	1	1	SEDTAMYYCAR	TRUE
A0A0A0MS15	IGHV3-49	4	2	AYGGTTEYAASVK	TRUE
				FTISRDDSK	FALSE
				SIAYLQMNSLK	TRUE
				TEDTAVYYCTR	FALSE
A0A0A0MT36	IGKV6D-21	1	0	YASQSISGVPSR	FALSE
A0A0B4J1U7	IGHV6-1	1	1	ITINPDTSK	TRUE
A0A0B4J1Y8	IGLV9-49	2	2	FSVLGSGLNR	TRUE
				VGTGGIVGSK	TRUE
A0A0B4J1Y9	IGHV3-72	1	1	TEDTAVYYCAR	TRUE
A0A0B4J2D5	GATD3B	2	0	ITDLANLSAANHDAAIFPGGFGAAK	FALSE
				NLSTFAVDGK	FALSE
A0A0C4DH24	IGKV6-21	1	1	YASQSFSGVPSR	TRUE
A0A0C4DH25	IGKV3D-20	2	1	FSGSGSGTDFTLTISR	FALSE
				LLIYDASSR	TRUE
A0A0C4DH29	IGHV1-3	2	1	DTSASTAYMELSSLR	TRUE
				SEDTAVYYCAR	FALSE
A0A0C4DH31	IGHV1-18	2	1	SDDTAVYYCAR	FALSE
				VTMTTDTSTSTAYMELR	TRUE
A0A0C4DH34	IGHV4-28	1	1	VTMSVDTSK	TRUE
A0A0C4DH35	IGHV3-35	1	1	AEDTAVYYCVR	TRUE
A0A0C4DH36	IGHV3-38	2	2	AEGTAVYYCAR	TRUE
				NTLYLQMNNLR	TRUE
A0A0C4DH38	IGHV5-51	2	1	ASDTAMYYCAR	FALSE
				GLEWMGIIYPGDSDTR	TRUE
A0A0C4DH41	IGHV4-61	2	0	LSSVTAADTAVYYCAR	FALSE
				VTISVDTSK	FALSE
A0A0C4DH67	IGKV1-8	1	1	MTQSPSSFSASTGDR	TRUE
A0A0G2JS06	IGLV5-39	2	1	QQGSGVPSR	FALSE
				SGINVGTYR	TRUE
A0A0J9YX35	IGHV3-64D	2	2	AEDTAVYYCVK	TRUE
				NTLYLQMSSLR	TRUE
A0A0U1RRL7	MMP24OS	1	1	GAPEPAQTQPQPQPQPAAPEGPEQPR	TRUE
A0A2R8Y619	H2BK1	1	0	AVTKYTSSK	FALSE
A0AV96	RBM47	6	6	LLGVCCSVDNCR	TRUE
				NLMIETTEDTIK	TRUE
				NLMIETTEDTIKK	TRUE
				PITPVYTVAPNVQR	TRUE
				SFGQFNPGCVER	TRUE
				VPEGVAGAPNEAALLALMER	TRUE
A0AVT1	UBA6	14	14	ACIGDTLCQK	TRUE
				AILSNEATK	TRUE
				GMITVTDPDLIEK	TRUE
				IQEFKPSNK	TRUE
				LETGQFLTFR	TRUE
				MYSIEPADR	TRUE
				NFALLGVGTSK	TRUE
				QDVIITALDNVEAR	TRUE
				SYTAADATLK	TRUE
				TVFFESLER	TRUE
				VCPTTETIYNDEFYTK	TRUE
				YGIEPTMVVQGVK	TRUE
				YQCVVLTEMK	TRUE
				YVLGDTAMQK	TRUE
A0FGR8	ESYT2	11	11	AQPPEAGPQGLHDLGR	TRUE
				EPTPSIASDISLPIATQELR	TRUE
				FQLSNSGPNSTIK	TRUE
				GANTHLSTFSFTK	TRUE
				NLIAFSEDGSDPYVR	TRUE
				SSSSLLASPGHISVK	TRUE
				VDVGQQPLR	TRUE
				VGNQIFQSR	TRUE
				VLVALASEELAK	TRUE
				VPLSQLLTSEDMTVSQR	TRUE
				VYTENVDKR	TRUE
A0M8Q6	IGLC7	1	1	VGVETTKPSK	TRUE
A0MZ66	SHTN1	6	6	ILAIELENLK	TRUE
				LVEVIEEVNK	TRUE
				QLQLITSLK	TRUE
				SMPVLGSVSSVTK	TRUE
				TVLNSEVLEQR	TRUE
				VTAEADSSSPTGILATSESK	TRUE
A1A5B4	ANO9	2	2	ADNSVFGLYR	TRUE
				LSETCTFAK	TRUE
A1A5D9	BICDL2	3	3	AVELEGDVEALR	TRUE
				ELSASASSSTPR	TRUE
				SEAGEALSALR	TRUE
A1IGU5	ARHGEF37	1	1	LLEVGSVTYQEEAAR	TRUE
A1L0T0	ILVBL	3	3	AAVETLGVPCFLGGMAR	TRUE
				TDFRDGSIAV	TRUE
				VLHDAQQQCR	TRUE
A1L170	C1orf226	2	2	LDPPPPITR	TRUE
				SVLQETFPR	TRUE
A1L188	NDUFAF8	2	2	CVQASTAPGGR	TRUE
				LAACGAEAAAYGR	TRUE
A1L390	PLEKHG3	2	2	EAILEMDSYYPNR	TRUE
				SSSVLSLEGSEK	TRUE
A1L4H1	SSC5D	6	6	ELGCGGALAAPGGAR	TRUE
				ELGCGGPQQPDPAAGR	TRUE
				GLGQLGEAVK	TRUE
				LADGPHGCAGR	TRUE
				LGPTLGAGTTRSPGSPPTLR	TRUE
				LTQVVEQER	TRUE
A1X283	SH3PXD2B	11	11	AAAASVPNADGLK	TRUE
				FEGRPVPDGDAK	TRUE
				GAVVEVIQK	TRUE
				GSLGPWGTGK	TRUE
				SFLPGEGPGR	TRUE
				SLLDGEGPQAVGGQDVAFSR	TRUE
				SVPVPLQEAPQQR	TRUE
				TDLPEEKPDATPQNPFLK	TRUE
				TEPPQGEDQVDICNLR	TRUE
				TSSSSRPLPEVR	TRUE
				YTVIYPYTAR	TRUE
A1Z1Q3	MACROD2	2	2	AAGPCLLAECR	TRUE
				ITCGYDLPAK	TRUE
A2A3N6	PIPSL	1	0	EPLSSETQYSVDTR	FALSE
A2RRD8	ZNF320	1	0	ALSQGLLTFR	FALSE
A2RRP1	NBAS	7	7	AVQEDEVGVPGSNSADLLR	TRUE
				DIVQSAIMK	TRUE
				NQNIVLSAR	TRUE
				QVDCALSLIR	TRUE
				STTPEELYQR	TRUE
				VLSGSPYYK	TRUE
				VLSNTTTTTK	TRUE
A2RTX5	TARS3	4	4	AAEALAAEAVASR	TRUE
				GDTSNIITVR	TRUE
				NELSGTLSGLTR	TRUE
				VNTATTTVYR	TRUE
A2RUC4	TYW5	3	3	AGQHLPVPR	TRUE
				SEVLNIDNPDLAK	TRUE
				TLPFDQLVQR	TRUE
A3KMH1	VWA8	12	12	ELSLYDGSR	TRUE
				ETQDPTAQSLAASLSTR	TRUE
				FELQDSGSSLLPK	TRUE
				GPALINIQEYPIER	TRUE
				IILDNLQAK	TRUE
				LLSQPCASDR	TRUE
				LVAAFGELR	TRUE
				QYGPNVPEPILQK	TRUE
				SSPLVNAALEGK	TRUE
				TLILEGLEK	TRUE
				VNAGTLAVLQR	TRUE
				YSGNPLDPPLR	TRUE
A3KN83	SBNO1	5	4	EFSDFIQAVER	TRUE
				FQQAADLIDAEQR	TRUE
				VEGVLASVSGTNVK	TRUE
				VVSNDDGSISYESR	TRUE
				VVYASATGASEPR	FALSE
A4D161	FAM221A	1	1	APLPSATKPS	TRUE
A4D1E9	GTPBP10	2	2	FVAGVGANSK	TRUE
				GGSGGMGYPR	TRUE
A4D1P6	WDR91	5	5	LGDSELAMVCSQR	TRUE
				LLLLGSGVGTVR	TRUE
				LSPAQGPPQPQSSAK	TRUE
				VASLDVDGVIK	TRUE
				VGFLSSLLPQSK	TRUE
A4D1U4	DENND11	2	2	EPEEPAAPEVLLQPGR	TRUE
				VEQGDAAPLLR	TRUE
A4D2B0	MBLAC1	1	1	ADGSVTLVLPQTR	TRUE
A4FU01	MTMR11	4	4	DSPSLLAVSSR	TRUE
				FDVATSLPR	TRUE
				LEAVSGLSR	TRUE
				VPDTLTFLR	TRUE
A5D8V6	VPS37C	2	2	NLEFQGPLEISR	TRUE
				SLAERNLEFQGPLEISR	TRUE
A5YKK6	CNOT1	20	20	ASQQEIQHIVNR	TRUE
				AVQELVHPVVDR	TRUE
				DAIAALGLLQK	TRUE
				ELNPSLNFK	TRUE
				EVTAAQVAR	TRUE
				GNAPEGLPQLMEVVR	TRUE
				IAMTTCEQIVR	TRUE
				ILPDSGGVAK	TRUE
				IVEPPENIQEK	TRUE
				LAEVGQYEQVK	TRUE
				LGTSGLNQPTFQQSK	TRUE
				LPDPFTPNLK	TRUE
				NLDEQLSAPK	TRUE
				NLILSAFPR	TRUE
				QLIMHAMAEWYMR	TRUE
				SNLQVSNEPGNR	TRUE
				SNYEAMIDR	TRUE
				SPVTFLSDLR	TRUE
				VDMLSEINIAPR	TRUE
				YCDPVVLTYQAER	TRUE
A6NC98	CCDC88B	14	14	AEPQLVETQNVR	TRUE
				AQELLLQSQR	TRUE
				AQLEMQSQQLR	TRUE
				EALVEALAAAGR	TRUE
				ESNQQLDLSACR	TRUE
				IQAPQLLGGETEGR	TRUE
				LGADGAGSTESLGGPPETELPEGR	TRUE
				LSDGALLLR	TRUE
				SNAMLVAEK	TRUE
				SSESFSPGDTPR	TRUE
				SSLQSPASVAPPQGPGTK	TRUE
				VLEPVPLPR	TRUE
				VLGIIAPSSR	TRUE
				VLSGVLEASK	TRUE
A6NCS6	C2orf72	2	2	AAGAAGAAAAAAR	TRUE
				PGGAAAEGAGPGAARGAQR	TRUE
A6ND36	FAM83G	1	1	TVPVADVLAR	TRUE
A6NDG6	PGP	5	5	AAAEAGGDDAR	TRUE
				FIAGTGCLVR	TRUE
				GETAVPGAPEALR	TRUE
				LGFITNNSSK	TRUE
				QADIIGKPSR	TRUE
A6NDU8	RIMOC1	1	1	AAAVSSVVR	TRUE
A6NFI3	ZNF316	4	4	AALHTTPDSPAAQLER	TRUE
				FGQSAALTR	TRUE
				GPSSAGPGER	TRUE
				SFSQSSALAR	TRUE
A6NFN3	RBFOX3	2	0	IEVNNATAR	FALSE
				KIEVNNATAR	FALSE
A6NHC0	CAPN8	1	1	AAQAAGVSR	TRUE
A6NHL2	TUBAL3	2	2	SFGGGTGSGFTSLLMER	TRUE
				SICMLSNTTAIVEAWAR	TRUE
A6NHR9	SMCHD1	8	8	DSTEYFIVFEPR	TRUE
				FIPGPPGNK	TRUE
				GLAPIECYNR	TRUE
				GMVFGAPVPK	TRUE
				ISGALFTNDK	TRUE
				LQIFSVEGQK	TRUE
				TTFQENTQSISVR	TRUE
				VQLISGPPAK	TRUE
A6NI72	NCF1B	4	0	EMFPIEAGAINPENR	FALSE
				PGPQSPGSPLEEER	FALSE
				STATDITGPIILQTYR	FALSE
				TSGSEMALSTGDVVEVVEK	FALSE
A6NIH7	UNC119B	3	3	AAAAASAAGPGGLVAGK	TRUE
				LMIENPYETR	TRUE
				SDSFYFVDNK	TRUE
A6NJG2	SOWAHD	2	2	APTASLAPTSQSLR	TRUE
				AQLGGAANR	TRUE
A6NK44	GLOD5	1	1	ACDVPIEEGPVPR	TRUE
A7E2V4	ZSWIM8	3	3	ALGGAGSGSK	TRUE
				APVSESLSR	TRUE
				LAVLDPALSPQR	TRUE
A7KAX9	ARHGAP32	6	6	GADVPEIPGDLTLK	TRUE
				ITSVPLDSEK	TRUE
				LSGVASNIQR	TRUE
				TGLLSVAEGK	TRUE
				TQAQVNSPIVTENK	TRUE
				YAASGQESLR	TRUE
A8CG34	POM121C	3	1	NAITSSYSSTR	FALSE
				SPAAAAAGAGER	FALSE
				TLFASPPAK	TRUE
A8K7I4	CLCA1	25	25	ALGGVNAAR	TRUE
				ASNATLPPITVTSK	TRUE
				ASVTALIESVNGK	TRUE
				CSAGITGTNVVK	TRUE
				GCEFVLQSR	TRUE
				IHLTPDFIAGK	TRUE
				ISTSILDLR	TRUE
				KLAEYGPQGR	TRUE
				LAEYGPQGR	TRUE
				LPAAASGGTSICSGLR	TRUE
				MAYLQIPGIAK	TRUE
				NADVLVAESTPPGNDEPYTEQMGNCGEK	TRUE
				NVAILIPETWK	TRUE
				QGGFVVDKNTK	TRUE
				QSGAIIHTVALGPSAAQELEELSK	TRUE
				RLPAAASGGTSICSGLR	TRUE
				SGSMATGNR	TRUE
				TSSGGSFVASDVPNAPIPDLFPPGQITDLK	TRUE
				TTPMTTQPPNPTFSLLQIGQR	TRUE
				TVTLELLDNGAGADATK	TRUE
				TVTLELLDNGAGADATKDDGVYSR	TRUE
				VDLKSEISNIAR	TRUE
				WGVFDEYNNDEK	TRUE
				YFTTYDTNGR	TRUE
				YIIRISTSILDLR	TRUE
A8MPS7	YDJC	1	1	EAVAAGDVDLPQVR	TRUE
A8MVS5	HIDE1	1	1	GGQVVQLLQAPTDQR	TRUE
A8MWD9	SNRPGP15	3	0	GNSIIMLEALER	FALSE
				GNSIIMLEALERV	FALSE
				SKAHPPELK	FALSE
A8MXV4	NUDT19	2	2	SSSLRPGPSR	TRUE
				TDNTGTLPEDVAFR	TRUE
A9UHW6	MIF4GD	4	4	IQSFDAETQQLLK	TRUE
				LAQPDSLSK	TRUE
				TALKDPGAVDLEK	TRUE
				VNNMPMMALVNPVYDCLFR	TRUE
B0I1T2	MYO1G	8	8	AMWPDGQQDITEVTK	TRUE
				DYLSSATDNPTASSLFAQR	TRUE
				LISVEPRPEQPEPDFR	TRUE
				LLYNSTDPTLR	TRUE
				TLVTLEQSR	TRUE
				VAAMGALQGLR	TRUE
				VIGFSPEEVESVHR	TRUE
				VSDCIPLSHR	TRUE
B5ME19	EIF3CL	13	0	CLEEFELLGK	FALSE
				DAHNALLDIQSSGR	FALSE
				DFESHITSYK	FALSE
				ELLGQGLLLR	FALSE
				FEELTNLIR	FALSE
				GCILTLVER	FALSE
				GTEITHAVVIK	FALSE
				LGSLVENNER	FALSE
				QLTPPEGSSK	FALSE
				QPLLGPPESMR	FALSE
				SIVDKEGVPR	FALSE
				TCHSFIINEK	FALSE
				TEPTAQQNLALQLAEK	FALSE
B7ZAP0	RABGAP1L	1	1	TATGTQPLQPAPVTQPPK	TRUE
B7ZBB8	PPP1R3G	2	2	LSLEAPGPAPFR	TRUE
				SFSLPADPILQAAK	TRUE
B9A064	IGLL5	2	0	AGVETTKPSK	FALSE
				ANPTVTLFPPSSEELQANK	FALSE
C4AMC7	WASH3P	3	0	GPGAGEGPGGAFAR	FALSE
				LFDAPLSISK	FALSE
				YVFLDPLAGAVTK	FALSE
C9J798	RASA4B	5	0	AVQNVGNMDTPASR	FALSE
				ELSGGAEAGTVPTSPGK	FALSE
				ELSGGAEAGTVPTSPGKVPEDSLAR	FALSE
				TLSLQAPPVK	FALSE
				TSETNTLFR	FALSE
C9JI98	TMEM238	2	2	APPPPAAGSR	TRUE
				LQLATLEAGPGAAGAGSE	TRUE
C9JLW8	MCRIP1	1	1	SPPSSSEIFTPAHEENVR	TRUE
E9PAV3	NACA	7	7	DIELVMSQANVSR	TRUE
				GAPMPPAATPPSPK	TRUE
				GAPTTPAATPPSPK	TRUE
				GGLATPPHK	TRUE
				IEDLSQQAQLAAAEK	TRUE
				NNSNDIVNAIMELTM	TRUE
				SPASDTYIVFGEAK	TRUE
E9PRG8	C11orf98	2	2	TAMEVEAPSKPAR	TRUE
				VVGAVIDQGLITR	TRUE
G9CGD6	CNK3/IPCEF1	3	0	ADGFVNLPDFTVER	FALSE
				PGEGLGMYIKSTYDGLHVITGTTENSPADR	FALSE
				SLEQASLSPLGDR	FALSE
I3L1E1	C19orf84	1	1	AGGPGAGPR	TRUE
K7EJ46	SMIM22	1	1	GVDNLALEP	TRUE
L0R819	ASDURF	3	3	IVVDELSNLK	TRUE
				IVVDELSNLKK	TRUE
				QQQNSNIFFLADR	TRUE
O00115	DNASE2	2	2	ALINSPEGAVGR	TRUE
				YLDESSGGWR	TRUE
O00116	AGPS	6	6	AASAATAAPTATPAAQESGTIPK	TRUE
				ESISDVGFGMLK	TRUE
				EYVDPNNIFGNR	TRUE
				GISDPLTVFEQTEAAAR	TRUE
				KGQIELTGK	TRUE
				TIISLDTSQMNR	TRUE
O00139	KIF2A	4	4	DLDVITIPSK	TRUE
				FSLIDLAGNER	TRUE
				PLVETIFER	TRUE
				QQVQVVGLQER	TRUE
O00148	DDX39A	5	2	DFLLKPELLR	FALSE
				FMQDPMEVFVDDETK	TRUE
				GLAITFVSDENDAK	FALSE
				ILVATNLFGR	FALSE
				NCPHVVVGTPGR	TRUE
O00151	PDLIM1	10	10	DFEQPLAISR	TRUE
				GCTDNLTLTVAR	TRUE
				GDPNKPSGFR	TRUE
				LVGGKDFEQPLAISR	TRUE
				SAMPFTASPASSTTAR	TRUE
				TTQQIDLQGPGPWGFR	TRUE
				VAASIGNAQK	TRUE
				VITNQYNNPAGLYSSENISNFNNALESK	TRUE
				VTPPEGYEVVTVFPK	TRUE
				VWSPLVTEEGK	TRUE
O00154	ACOT7	5	5	LMDEVAGIVAAR	TRUE
				MIEEAGAIISTR	TRUE
				SLPVPQLVPETEDEK	TRUE
				TDFLSPMCIGEVAHVSAEITYTSK	TRUE
				VLEVPPVVYSR	TRUE
O00159	MYO1C	22	22	ALQVELVPTGEIIR	TRUE
				DGTIDFTPGSELLITK	TRUE
				DNYPQSVPR	TRUE
				DQAVMISGESGAGK	TRUE
				GDVVLQSDHVIETLTK	TRUE
				GEELLSPLNLEQAAYAR	TRUE
				GVSFYEVPPHLFAVADTVYR	TRUE
				IICDLVEEK	TRUE
				LGTDEISPR	TRUE
				LLQFYAETCPAPER	TRUE
				LLQSNPVLEAFGNAK	TRUE
				LLSVEGSTLR	TRUE
				NGHLAVVAPR	TRUE
				NPIMSQCFDR	TRUE
				NPQSYLYLVK	TRUE
				PQDGVAVLVR	TRUE
				QLLLTPNAVVIVEDAK	TRUE
				RDQAVMISGESGAGK	TRUE
				TLFATEDALEVR	TRUE
				VLQALGSEPIQYAVPVVK	TRUE
				VTMESALTAR	TRUE
				YLGLLENLR	TRUE
O00160	MYO1F	9	9	AVNMEPDQYQMGSTK	TRUE
				GFGDLAVLK	TRUE
				GPPSTSLGASR	TRUE
				NPESLFLLEEVR	TRUE
				QSGVDDMVLLPQITEDAIAANLR	TRUE
				TEFVSLLCK	TRUE
				VSYDVSGFCER	TRUE
				VVCDLIENK	TRUE
				YAILTPETWPR	TRUE
O00161	SNAP23	10	10	AHQITDESLESTR	TRUE
				DMALNIGNEIDAQNPQIK	TRUE
				IEEGLDQINK	TRUE
				IEEGLDQINKDMR	TRUE
				ILGLAIESQDAGIK	TRUE
				ITDKADTNR	TRUE
				MDNLSSEEIQQR	TRUE
				QPGPVTNGQLQQPTTGAASGGYIK	TRUE
				TITMLDEQK	TRUE
				TITMLDEQKEQLNR	TRUE
O00165	HAX1	2	2	IFGGVLESDAR	TRUE
				ITKPDGIVEER	TRUE
O00170	AIP	6	6	AVPLIHQEGNR	TRUE
				EGEIAQFLCDIK	TRUE
				GELPDFQDGTK	TRUE
				NIAVGKDPLEGQR	TRUE
				VLELDPALAPVVSR	TRUE
				YYDAIACLK	TRUE
O00175	CCL24	1	1	VVSYQLSSR	TRUE
O00178	GTPBP1	6	6	DDVIVTASNFSSER	TRUE
				LVLVSPTSEQYDSLLR	TRUE
				SAMDSPVPASMFAPEPSSPGAAR	TRUE
				SQGACVTPASGC	TRUE
				VAVVGNVDAGK	TRUE
				VGDNDFLEVR	TRUE
O00182	LGALS9	2	0	FEDGGYVVCNTR	FALSE
				SILLSGTVLPSAQR	FALSE
O00186	STXBP3	3	3	IMLLDEFTTK	TRUE
				SAEETFQLSR	TRUE
				VLLPVLLNK	TRUE
O00187	MASP2	1	1	LASPGFPGEYANDQER	TRUE
O00192	ARVCF	1	1	GGGPVATLSR	TRUE
O00193	SMAP	1	1	INEELESQYQQSMDSK	TRUE
O00194	RAB27B	2	2	LLALGDSGVGK	TRUE
				VVYNAQGPNGSSGK	TRUE
O00203	AP3B1	12	11	ALKDPNQLIR	TRUE
				EASADLSPYVR	TRUE
				EGSTAQLIINTEK	TRUE
				ELKPVLSQG	TRUE
				LLDSITVPVAR	TRUE
				LYSLDPEQK	TRUE
				NASELFPAVVK	TRUE
				NTKPLLQSR	FALSE
				NVEVIELAK	TRUE
				QFAAATIQTIGR	TRUE
				TVIGSVLLR	TRUE
				VVNVANVGAVPSGQDNIHR	TRUE
O00213	APBB1	1	1	LQATAVGPK	TRUE
O00214	LGALS8	3	3	AGCIVCNTLINEK	TRUE
				LNTPMGPGR	TRUE
				SFNVDLLAGK	TRUE
O00217	NDUFS8	4	4	EPATINYPFEK	TRUE
				LCEAICPAQAITIEAEPR	TRUE
				TLLWTELFR	TRUE
				YVNMQDPEMDMK	TRUE
O00231	PSMD11	15	15	AAAAVVEFQR	TRUE
				AELRDDPIISTHLAK	TRUE
				AQSLLSTDR	TRUE
				DDPIISTHLAK	TRUE
				DIQENDEEAVQVK	TRUE
				EASIDILHSIVK	TRUE
				EQSILELGSLLAK	TRUE
				IMLNTPEDVQALVSGK	TRUE
				LYDNLLEQNLIR	TRUE
				TGQAAELGGLLK	TRUE
				TTANAIYCPPK	TRUE
				TYEAALETIQNMSK	TRUE
				TYHALSNLPK	TRUE
				VQIEHISSLIK	TRUE
				YQEALHLGSQLLR	TRUE
O00232	PSMD12	7	7	AIYDTPCIQAESEK	TRUE
				GSLESPATDVFGSTEEGEKR	TRUE
				LFTTMELMR	TRUE
				LNSLMSLVNK	TRUE
				MEVDYSATVDQR	TRUE
				TASDMVSTSR	TRUE
				VEFILEQMR	TRUE
O00233	PSMD9	6	6	ANYDVLESQK	TRUE
				GIGMNEPLVDCEGYPR	TRUE
				GLLGCNIIPLQR	TRUE
				KLGQSESQGPPR	TRUE
				LGQSESQGPPR	TRUE
				SDVDLYQVR	TRUE
O00244	ATOX1	1	1	YDIDLPNKK	TRUE
O00255	MEN1	3	3	GAVDLSLYPR	TRUE
				GLGTGQGAVSGPPR	TRUE
				GQTVNAGVAER	TRUE
O00257	CBX4	1	1	SNVLTGLQDSSTDNR	TRUE
O00264	PGRMC1	6	5	DFTPAELRR	TRUE
				FYGPEGPYGVFAGR	TRUE
				GDQPAASGDSDDDEPPPLPR	TRUE
				GLATFCLDK	FALSE
				RDFTPAELR	TRUE
				RFDGVQDPR	TRUE
O00267	SUPT5H	12	12	DNELIGQTVR	TRUE
				DTYLDTQVVGQTGVIR	TRUE
				DVTNFTVGGFAPMSPR	TRUE
				ETFQVLNMYGK	TRUE
				FEGDTGLIVR	TRUE
				QAIEGVGNLR	TRUE
				TPAQSGAWDPNNPNTPSR	TRUE
				TPMYGSQTPLQDGSR	TRUE
				TPMYGSQTPMYGSGSR	TRUE
				VELHSTCQTISVDR	TRUE
				VIDGPHSGR	TRUE
				VVSISSEHLEPITPTK	TRUE
O00268	TAF4	6	5	DANLTALAAIGPR	FALSE
				FFEQLDQIEK	TRUE
				GAAGAVTQSLSR	TRUE
				PAGPAALAAR	TRUE
				QVSQAQTTVQPSATLQR	TRUE
				TPTATTSGIR	TRUE
O00273	DFFA	9	9	AAFGEEVDAVDTGISR	TRUE
				ACDILAIDK	TRUE
				ASPPGDLQNPK	TRUE
				EQHGVAASCLEDLR	TRUE
				ETSSDVALASHILTALR	TRUE
				FVALASNEK	TRUE
				LQHTLQQVLDQR	TRUE
				LQQTQSLHSLR	TRUE
				MEVTGDAGVPESGEIR	TRUE
O00287	RFXAP	1	1	SPEVVQFLQK	TRUE
O00291	HIP1	7	7	ADKDSPNLAQLQQASR	TRUE
				AIGEELLPR	TRUE
				AINTQEVAVK	TRUE
				APPEPADSLTEACK	TRUE
				GVGAGLEAAER	TRUE
				LASTEESMCQLAK	TRUE
				VLELENELQK	TRUE
O00299	CLIC1	11	11	AEEQPQVELFVK	TRUE
				EEFASTCPDDEEIELAYEQVAK	TRUE
				FLDGNELTLADCNLLPK	TRUE
				GFTIPEAFR	TRUE
				GVTFNVTTVDTK	TRUE
				IGNCPFSQR	TRUE
				KFLDGNELTLADCNLLPK	TRUE
				LAALNPESNTAGLDIFAK	TRUE
				LHIVQVVCK	TRUE
				NSNPALNDNLEK	TRUE
				VLDNYLTSPLPEEVDETSAEDEGVSQR	TRUE
O00303	EIF3F	6	6	AYVSTLMGVPGR	TRUE
				FLMSLVNQVPK	TRUE
				TMGVMFTPLTVK	TRUE
				VIGLSSDLQQVGGASAR	TRUE
				VIGTLLGTVDK	TRUE
				VSADNTVGR	TRUE
O00308	WWP2	1	1	AGVALPFEK	TRUE
O00330	PDHX	6	6	DVGPPPPVSK	TRUE
				GIQEIADSVK	TRUE
				HSLDASQGTATGPR	TRUE
				ILMPSLSPTMEEGNIVK	TRUE
				QLITVTMSSDSR	TRUE
				VSVNDFIIK	TRUE
O00338	SULT1C2	2	2	IVQETSFEK	TRUE
				SILDQSISSFMR	TRUE
O00339	MATN2	6	6	AAIVFTDGR	TRUE
				ANGITMYAVGVGK	TRUE
				LEEMTQRMEALENR	TRUE
				SLGEENFEVVK	TRUE
				VGLLQYGSTVK	TRUE
				YLFEEDNLLR	TRUE
O00391	QSOX1	11	11	AAPGQEPPEHMAELQR	TRUE
				DFNIPGFPTVR	TRUE
				DTGAALLAESR	TRUE
				DVQNVAAAPELAMGALELESR	TRUE
				EVALDLSQHK	TRUE
				LAGAPSEDPQFPK	TRUE
				LEEIDGFFAR	TRUE
				NGSGAVFPVAGADVQTLR	TRUE
				RVLNTEANVVR	TRUE
				SALYSPSDPLTLLQADTVR	TRUE
				VLNTEANVVR	TRUE
O00400	SLC33A1	2	2	EALLGDTGTGDFLK	TRUE
				TPDAVELCK	TRUE
O00401	WASL	3	3	GAPPPPPSR	TRUE
				QAPPPPPPSR	TRUE
				SSVQQQPPPPR	TRUE
O00410	IPO5	16	15	EGFVEYTEQVVK	FALSE
				ENVNATENCISAVGK	TRUE
				FLFDSVSSQNVGLR	TRUE
				FMQDASDVMQLLLK	TRUE
				HIVENAVQK	TRUE
				KQAEETYENIPGQSK	TRUE
				LCGDTSLNNMQR	TRUE
				MLVQCMQDQEHPSIR	TRUE
				SLVEIADTVPK	TRUE
				STACQMLVCYAK	TRUE
				TKENVNATENCISAVGK	TRUE
				VAAAESMPLLLECAR	TRUE
				VCDIAAELAR	TRUE
				VIAALLQTMEDQGNQR	TRUE
				VIQSADSKTK	TRUE
				YAACNAVGQMATDFAPGFQK	TRUE
O00418	EEF2K	2	2	AFDSGQNLSPDR	TRUE
				ASAVALEVQR	TRUE
O00422	SAP18	4	4	AVESRVTQEEIK	TRUE
				EIGSTMSGR	TRUE
				KGTDDSMTLQSQK	TRUE
				VKEIGSTMSGR	TRUE
O00423	EML1	10	10	EPVFSAEEGYVK	TRUE
				GDVILIGTTR	TRUE
				ISYAVQGAHEGGIFALCMLR	TRUE
				ITIATGQVAGTSK	TRUE
				KETAVPATK	TRUE
				LLSTGDDFGK	TRUE
				LNITEEQQAVLNR	TRUE
				QVVSVETTR	TRUE
				TTVNNGTVLPK	TRUE
				VQMQEDDIQLLK	TRUE
O00425	IGF2BP3	1	1	ALQSGPPQSR	TRUE
O00429	DNM1L	13	13	ALQGASQIIAEIR	TRUE
				DTLQSELVGQLYK	TRUE
				GVSPEPIHLK	TRUE
				KNIQDSVPK	TRUE
				LGIIGVVNR	TRUE
				LYTDFDEIR	TRUE
				MEALIPVINK	TRUE
				SATLLQLITK	TRUE
				SKPIPIMPASPQK	TRUE
				SQLDINNKK	TRUE
				SSVLESLVGR	TRUE
				VPSALAPASQEPSPAASAEADGK	TRUE
				YIETSELCGGAR	TRUE
O00442	RTCA	4	4	AFVAGVLPFK	TRUE
				DLYVNIQPVQEPK	TRUE
				QLNPINLTER	TRUE
				VEVDGSIMEGGGQILR	TRUE
O00443	PIK3C2A	7	7	EGQIEPSFVFR	TRUE
				GMVELVPASDTLR	TRUE
				LIESSLGSIATK	TRUE
				QDMLALQMIK	TRUE
				SLSVATVTR	TRUE
				TADVTSLFGGEDTSR	TRUE
				VSNLQVSPK	TRUE
O00453	LST1	2	2	ADYACIAENKPT	TRUE
				LPVPSSEGPDLR	TRUE
O00459	PIK3R2	5	4	AGPEGFQYR	TRUE
				APGPGPPPAAR	TRUE
				IFEEQGQTQEK	TRUE
				TAIEAFNETIK	FALSE
				TQAEEMLSGK	TRUE
O00461	GOLIM4	4	4	EAANLLEGHAR	TRUE
				EADPESEADR	TRUE
				FQSPYEEQLEQQR	TRUE
				LAVQQVEEAQQLR	TRUE
O00462	MANBA	5	5	LPQSTDPLR	TRUE
				TVELIEEPIK	TRUE
				VNLILEGVDTVSK	TRUE
				VSSTEDWSFNSK	TRUE
				YSFDITNVVR	TRUE
O00468	AGRN	20	20	ALEPQGLLLYNGNAR	TRUE
				ALGPAGCEADASAPATCAEMR	TRUE
				EAACLQQTQIEEAR	TRUE
				EPLYVGGAPDFSK	TRUE
				FDGPCDPCQGALPDPSR	TRUE
				FGALCEAETGR	TRUE
				LELGIGPGAATR	TRUE
				LPSSAVTPR	TRUE
				QVDVTSFAGHPCTR	TRUE
				SADGLTASCLCPATCR	TRUE
				SAGDVDTLAFDGR	TRUE
				SELFGETAR	TRUE
				SGCTPCSCDPQGAVR	TRUE
				STVPVNTNR	TRUE
				TEATQGLVLWSGK	TRUE
				TPSLDAEGSNCPATK	TRUE
				VLGAPVPAFEGR	TRUE
				VLPEGGAQCECPLGR	TRUE
				VTCDGAYRPVCAQDGR	TRUE
				VVISGFGDPLICDNQVSTGDTR	TRUE
O00469	PLOD2	7	7	EFIAPVTLK	TRUE
				GGDGINSIGGGQK	TRUE
				ISGGYENVPTDDIHMK	TRUE
				IVGPEENLSQAEAR	TRUE
				SEDYVDIVQGNR	TRUE
				VVFAADGILWPDKR	TRUE
				YIAVSFIDP	TRUE
O00470	MEIS1	2	1	IVQPMIDQSNR	FALSE
				SANLTDQPSWNR	TRUE
O00471	EXOC5	7	7	IKEAADIIQK	TRUE
				LIQNVFEIK	TRUE
				LSDPSDLPR	TRUE
				NDIFEDAGILCQR	TRUE
				QVCSGEQLANLDK	TRUE
				QVGDIFSNPETVLAK	TRUE
				SIGTGGIQDLK	TRUE
O00472	ELL2	1	1	AAGGTGGLREEQR	TRUE
O00478	BTN3A3	2	1	GSSGGGVSCIIR	TRUE
				TASISIADPFFR	FALSE
O00479	HMGN4	2	2	DASTLQSQK	TRUE
				NRDASTLQSQK	TRUE
O00481	BTN3A1	2	2	GSSGEGVSCTIR	TRUE
				TANPILLVSEDQR	TRUE
O00483	NDUFA4	1	1	FYSVNVDYSK	TRUE
O00487	PSMD14	5	5	AVAVVVDPIQSVK	TRUE
				AVEEEDKMTPEQLAIK	TRUE
				LINANMMVLGHEPR	TRUE
				MTPEQLAIK	TRUE
				VIDVFAMPQSGTGVSVEAVDPVFQAK	TRUE
O00488	ZNF593	2	2	AAGMGSYVPPR	TRUE
				LAVPTEVSTEVPEMDTST	TRUE
O00499	BIN1	9	9	GPPVPPPPK	TRUE
				GVFPENFTER	TRUE
				GVFPENFTERVP	TRUE
				LDLPPGFMFK	TRUE
				LNQNLNDVLVGLEK	TRUE
				SPSPPDGSPAATPEIR	TRUE
				VGFYVNTFQSIAGLEENFHK	TRUE
				VNHEPEPAGGATPGATLPK	TRUE
				VQAQHDYTATDTDELQLK	TRUE
O00505	KPNA3	5	3	DSQVVQVVLDGLK	TRUE
				IEVLQQHENEDIYK	TRUE
				LLSSDRNPPIDDLIK	FALSE
				NPPIDDLIK	FALSE
				SGILPILVK	TRUE
O00506	STK25	1	1	VDPEELFTK	TRUE
O00512	BCL9	5	5	ELEFGMVPSGMK	TRUE
				IPVEGPLSPSR	TRUE
				NLREPIGPDQR	TRUE
				SISADSFDQR	TRUE
				SPNLPSMNNMPGMGINTQNPR	TRUE
O00515	LAD1	12	12	ATASEQPLAQEPPASGGSPATTK	TRUE
				GLPCTELFVAPVGVASK	TRUE
				LPPVTLQVK	TRUE
				NLSSTTDDEAPR	TRUE
				NSLSPVQATQK	TRUE
				NSLSPVQATQKPLVSK	TRUE
				QGASDPPTVASR	TRUE
				QVVEAAQAPIQER	TRUE
				RATASEQPLAQEPPASGGSPATTK	TRUE
				RQVVEAAQAPIQER	TRUE
				SLAPGMALGSGR	TRUE
				SPTADAKPAPK	TRUE
O00519	FAAH	5	5	ALLCEDMFR	TRUE
				DVESLALCLR	TRUE
				EEVYTSSQPLR	TRUE
				ELAPEAVLFTYVGK	TRUE
				GCVYGQEAVR	TRUE
O00522	KRIT1	1	1	EASLFIVPSVVK	TRUE
O00533	CHL1	4	4	GSVESNGSSTATFPLRA	TRUE
				VEEVKPLEGR	TRUE
				VIAVNEVGR	TRUE
				VMTPAVYAPYDVK	TRUE
O00534	VWA5A	12	12	AISQGHQAFLLEGDSSSR	TRUE
				ASGGTSEFITGK	TRUE
				DVFSCNVGNLQPGSK	TRUE
				DVPRPILLGASAPLK	TRUE
				FVLPAVLNPR	TRUE
				LISYAQLTGR	TRUE
				MLSPEQTVIFR	TRUE
				SGSMQSPMSSQDTSQLR	TRUE
				SSVDPAIFAF	TRUE
				VQSNCPLSPTEYLGEDK	TRUE
				YTQQTMEEALGR	TRUE
				YVQELPLEADGALR	TRUE
O00560	SDCBP	7	7	ANVAVVSGAPLQGQLVAR	TRUE
				ITSIVKDSSAAR	TRUE
				LYPELSQYMGLSLNEEEIR	TRUE
				PSSINYMVAPVTGNDVGIR	TRUE
				SLMDHTIPEV	TRUE
				SLYPSLEDLK	TRUE
				SLYPSLEDLKVDK	TRUE
O00562	PITPNM1	8	8	ASTAFCPPAASSEAPDGPSSTAR	TRUE
				EGPGTPPTTLAR	TRUE
				GPLSDDWAR	TRUE
				GSPEPSALPPQR	TRUE
				ILDTIDIVR	TRUE
				LTFPVPPER	TRUE
				TNQAYSAFLR	TRUE
				TVMPALEAAQMR	TRUE
O00567	NOP56	7	7	GLTDLSACK	TRUE
				IDCFSEVPTSVFGEK	TRUE
				IINDNATYCR	TRUE
				LLLETHLPSK	TRUE
				LSFYETGEIPR	TRUE
				VLLGVGDPK	TRUE
				YPASTVQILGAEK	TRUE
O00571	DDX3X	13	3	DAYSSFGSR	FALSE
				DKDAYSSFGSR	FALSE
				DLLDLLVEAK	FALSE
				DLMACAQTGSGK	FALSE
				IVEQDTMPPK	FALSE
				LEQELFSGGNTGINFEK	FALSE
				QSSGASSSSFSSSR	TRUE
				SDYDGIGSR	TRUE
				SPILVATAVAAR	FALSE
				VGNLGLATSFFNER	TRUE
				VGSTSENITQK	FALSE
				YLVLDEADR	FALSE
				YTRPTPVQK	FALSE
O00584	RNASET2	3	3	ELDLNSVLLK	TRUE
				VCEDGPVFYPPPK	TRUE
				VCEDGPVFYPPPKK	TRUE
O00592	PODXL	1	1	LASVPGSQTVVVK	TRUE
O00602	FCN1	3	3	MDGSVDFYR	TRUE
				VDLVDFEGNHQFAK	TRUE
				VVGLEGSDK	TRUE
O00622	CCN1	1	1	ELGFDASEVELTR	TRUE
O00625	PIR	1	1	MVEPQYQELK	TRUE
O00629	KPNA4	3	3	IEQLQNHENEDIYK	TRUE
				MAEDEAETIGNLIEECGGLEK	TRUE
				VQNTSLEAIVQNASSDNQGIQLSAVQAAR	TRUE
O00635	TRIM38	1	1	LLQNVNDTLSR	TRUE
O00712	NFIB	3	3	NPPGYLEDSFVK	TRUE
				SGVFNVSELVR	TRUE
				SLSSPPSSK	TRUE
O00743	PPP6C	2	2	VTNEFVHINNLK	TRUE
				YLPENDLKR	TRUE
O00746	NME4	1	1	AMIGHTDSAEAAPGTIR	TRUE
O00748	CES2	8	8	ADHGDELPFVFR	TRUE
				EEILAINKPFK	TRUE
				EMDREASQAALQK	TRUE
				FAPPEPPESWSGVR	TRUE
				IQELEEPEER	TRUE
				LGVLGFFSTGDK	TRUE
				MIPGVVDGVFLPR	TRUE
				SFFGGNYIK	TRUE
O00754	MAN2B1	8	8	DGSLELMVHR	TRUE
				DLFSTFTITR	TRUE
				FLEDTFGNDGRPR	TRUE
				GVSEPLMENGSGAWVR	TRUE
				LEHQFAVGEDSGR	TRUE
				LPVSEGVFVVK	TRUE
				LQETTLVANQLR	TRUE
				TVDQYFYGIK	TRUE
O00762	UBE2C	3	3	ASQNRDPAATSVAAAR	TRUE
				DPAATSVAAAR	TRUE
				GISAFPESDNLFK	TRUE
O00764	PDXK	8	8	AQAGEGVRPSPMQLELR	TRUE
				DIEDPEIVVQATVL	TRUE
				LVYVCDPVLGDK	TRUE
				NPAGSVVMER	TRUE
				PSPMQLELR	TRUE
				RNPAGSVVMER	TRUE
				VLSIQSHVIR	TRUE
				YDYVLTGYTR	TRUE
O14495	PLPP3	3	3	EILSPVDIIDR	TRUE
				NGGSPALNNNPR	TRUE
				TTLSLPAPAIR	TRUE
O14497	ARID1A	12	12	AAAGQESEGPAVGPPQPLGK	TRUE
				AAGPGLGNVAMGPR	TRUE
				AAQVAPAAASSLGNPPPPPPSELK	TRUE
				AAQVAPAAASSLGNPPPPPPSELKK	TRUE
				EIGGLTQVNK	TRUE
				GGQEDMNLSLQSR	TRUE
				GPSPSPVGSPASVAQSR	TRUE
				ITATMDDMLSTR	TRUE
				NDMTYNYANR	TRUE
				SAYPPPAPAYALSSPR	TRUE
				SLSFVPGNDFEMSK	TRUE
				TPQPSSPMDQMGK	TRUE
O14498	ISLR	3	3	ALPGTPVASSQPR	TRUE
				LPGLPEGAFR	TRUE
				MDSNELTFIPR	TRUE
O14523	C2CD2L	3	3	GPGPALAGEPAGSLR	TRUE
				LDSPSRSPSK	TRUE
				NLGTPTSSTPR	TRUE
O14526	FCHO1	2	2	APACSPEAAAAQLR	TRUE
				LPDVSEAGGSGR	TRUE
O14530	TXNDC9	2	2	LVEEHLDSEIQK	TRUE
				VLEHQLLQTTK	TRUE
O14531	DPYSL4	3	3	GAPAVVISQGR	TRUE
				MDENEFVAVTSTNAAK	TRUE
				QIGENLIVPGGIK	TRUE
O14545	TRAFD1	3	3	ALPSLNTGSSSPR	TRUE
				LDSQPQETSPELPR	TRUE
				VTPAAANYR	TRUE
O14548	COX7A2L	2	2	GLPDQMLYR	TRUE
				LTSDSTVYDYAGK	TRUE
O14556	GAPDHS	1	1	VPTPDVSVVDLTCR	TRUE
O14558	HSPB6	6	6	APSVALPVAQVPTDPGHFSVLLDVK	TRUE
				ASAPLPGLSAPGR	TRUE
				HFSPEEIAVK	TRUE
				MEIPVPVQPSWLR	TRUE
				RASAPLPGLSAPGR	TRUE
				VVGEHVEVHAR	TRUE
O14561	NDUFAB1	4	4	LMCPQEIVDYIADK	TRUE
				LMCPQEIVDYIADKK	TRUE
				LSVNSHFMK	TRUE
				LYDKIDPEK	TRUE
O14562	UBFD1	4	4	FPLDSTGSELK	TRUE
				GSLQPAPAQPPGDPAAQASVSNGEDAGGGAGR	TRUE
				LEQDQLWIGTK	TRUE
				LPTVPLSGMYNK	TRUE
O14569	CYB561D2	1	1	ALSAETESHIYR	TRUE
O14578	CIT	5	5	FYLETQAGK	TRUE
				LAANSSLFTQR	TRUE
				LLMIAGEER	TRUE
				LTQGLQEALDR	TRUE
				SPFAEGTSAR	TRUE
O14579	COPE	6	6	APPAPGPASGGSGEVDELFDVK	TRUE
				DSIVAELDREMSR	TRUE
				FGVVLDEIKPSSAPELQAVR	TRUE
				LVLQYAPSA	TRUE
				MFADYLAHESR	TRUE
				NAFYIGSYQQCINEAQR	TRUE
O14602	EIF1AY	1	1	LEALCFDGVK	TRUE
O14617	AP3D1	10	10	ALDIDLDKPLADSEK	TRUE
				ALDLLYGMVSK	TRUE
				ASCILQLVK	TRUE
				EQAGEAEGAQAVTQLMVDR	TRUE
				GMELSVLDSLNAR	TRUE
				ILIEDSDQNLK	TRUE
				LLESGDLSMSSIK	TRUE
				LYASILQQK	TRUE
				VDSCASMYSR	TRUE
				VPGLPMSDQYVK	TRUE
O14618	CCS	2	2	KESAQPPAHL	TRUE
				SAGLFQNPK	TRUE
O14638	ENPP3	3	3	TYLPTFETTI	TRUE
				VPFYEPSHAEEVSK	TRUE
				VQPVSEILQLK	TRUE
O14639	ABLIM1	8	8	DYQTLPDGHMPAMR	TRUE
				FPAAQAPDPSETPK	TRUE
				GVSMPNMLEPK	TRUE
				STSQGSINSPVYSR	TRUE
				TASLPGYGR	TRUE
				TLSPTPSAEGYQDVR	TRUE
				TSSESIYSR	TRUE
				VLTGEYISK	TRUE
O14641	DVL2	4	3	AMAAPESGLEVR	TRUE
				DLGSVPPELTASR	TRUE
				FSSSTEQSSASR	FALSE
				GSTGGAPNLR	TRUE
O14646	CHD1	1	1	SSPSILAVQR	TRUE
O14653	GOSR2	2	2	MDPLFQQTHK	TRUE
				YDVQHLQTALR	TRUE
O14656	TOR1A	1	1	VAEEMTFFPK	TRUE
O14657	TOR1B	1	1	VAEEMTFFPR	TRUE
O14662	STX16	3	3	IDYNVEQSCIK	TRUE
				LTDAFLLLR	TRUE
				SIAAELDELADDR	TRUE
O14672	ADAM10	4	4	AIDTIYQTTDFSGIR	TRUE
				GGTFYVEPAER	TRUE
				LVDADGPLAR	TRUE
				TITLQPGSPCNDFR	TRUE
O14683	TP53I11	1	1	ISQVLGNEIK	TRUE
O14684	PTGES	1	1	AFANPEDALR	TRUE
O14686	KMT2D	8	8	APVAPTPPTLIK	TRUE
				ASEPLLSPPPFGESR	TRUE
				GVEPGPLGPEERPPPAADASEPR	TRUE
				IIEPVAAMR	TRUE
				LQETPQDCSGGPVR	TRUE
				LSGPILGPGSFPSDDR	TRUE
				PGQSMMGSR	TRUE
				SVAEQHTPVCSR	TRUE
O14713	ITGB1BP1	1	1	SVDSSLGGLSR	TRUE
O14727	APAF1	4	4	LPLNIEEAK	TRUE
				SVLAAEAVR	TRUE
				SVTDSVMGPK	TRUE
				YVVPVESSLGK	TRUE
O14732	IMPA2	2	2	ALVLTEIGPK	TRUE
				FIAEEAAASGAK	TRUE
O14735	CDIPT	3	3	FGAMLDMLTDR	TRUE
				MIDLSGNPVLR	TRUE
				NMAALDAADR	TRUE
O14737	PDCD5	6	6	ADEELEALR	TRUE
				AVENYLIQMAR	TRUE
				LSNLALVKPEK	TRUE
				NSILAQVLDQSAR	TRUE
				VSEQGLIEILK	TRUE
				VSQQTEKTTTVK	TRUE
O14744	PRMT5	6	6	AAMAVGGAGGSR	TRUE
				DLNCVPEIADTLGAVAK	TRUE
				DWNTLIVGK	TRUE
				GPLVNASLR	TRUE
				VPLVAPEDLR	TRUE
				YSQYQQAIYK	TRUE
O14745	NHERF1	10	10	AQEAPGQAEPPAAAEVQGAGNENEPR	TRUE
				EALAEAALESPR	TRUE
				EALAEAALESPRPALVR	TRUE
				ETHQQVVSR	TRUE
				IVEVNGVCMEGK	TRUE
				LLVVDPETDEQLQK	TRUE
				LVEPGSPAEK	TRUE
				QHGDVVSAIR	TRUE
				SADAAAGAPLPR	TRUE
				SVDPDSPAEASGLR	TRUE
O14757	CHEK1	2	2	ILVENPSAR	TRUE
				VTSGGVSESPSGFSK	TRUE
O14763	TNFRSF10B	1	1	LLVPANEGDPTETLR	TRUE
O14772	FPGT	2	2	CSVAPGSVVEYSR	TRUE
				LPNASALGK	TRUE
O14773	TPP1	7	7	AYPDVAALSDGYWVVSNR	TRUE
				ILSGRPPLGFLNPR	TRUE
				LFGGNFAHQASVAR	TRUE
				LSELVQAVSDPSSPQYGK	TRUE
				LYQQHGAGLFDVTR	TRUE
				PSYQEEAVTK	TRUE
				VPIPWVSGTSASTPVFGGILSLINEHR	TRUE
O14775	GNB5	1	1	ESIIFGASSVDFSLSGR	TRUE
O14776	TCERG1	8	8	ATFSEFAAK	TRUE
				EALFNEFVAAAR	TRUE
				GPPPLMRPPPPFGMMR	TRUE
				GPPPPPTASEPTR	TRUE
				LFNEHIEALTK	TRUE
				TLESTWEKPQELK	TRUE
				VFFYNPTTR	TRUE
				YLVLDCVPEER	TRUE
O14786	NRP1	1	1	FVTAVGTQGAISK	TRUE
O14787	TNPO2	1	1	QECLNNIGDASSLIR	TRUE
O14791	APOL1	4	4	ANLQSVPHASASR	TRUE
				LNILNNNYK	TRUE
				VNEPSILEMSR	TRUE
				VQQNVPSGTDTGDPQSK	TRUE
O14795	UNC13B	2	1	AISPTSSSR	TRUE
				VQELQSPPR	FALSE
O14798	TNFRSF10C	1	1	QEEVPQQTVAPQQQR	TRUE
O14802	POLR3A	9	9	AEALVLMGTK	TRUE
				ESVLMLASFEK	TRUE
				IDEVAVPVHVAK	TRUE
				LAPVYLSNR	TRUE
				LEVNAETVR	TRUE
				NELILTTESIMK	TRUE
				TAETGYMQR	TRUE
				TVISPDPNLR	TRUE
				VVVQGIPEVSR	TRUE
O14807	MRAS	1	1	ATSAVPSDNLPTYK	TRUE
O14815	CAPN9	3	3	ITHSSGQSFEQMR	TRUE
				LNGSYEALK	TRUE
				NPEFILGGATR	TRUE
O14818	PSMA7	7	4	AITVFSPDGHLFQVEYAQEAVK	FALSE
				ALLEVVQSGGK	FALSE
				DIVVLGVEK	TRUE
				GRDIVVLGVEK	TRUE
				ILNPEEIEK	TRUE
				KGSTAVGVR	TRUE
				LTVEDPVTVEYITR	FALSE
O14828	SCAMP3	4	4	AQQEFAAGVFSNPAVR	TRUE
				ELQHAALGGTATR	TRUE
				QYATLDVYNPFETR	TRUE
				TAAANAAAGAAENAFR	TRUE
O14841	OPLAH	13	13	AGDFGAAFVER	TRUE
				DIPLNQGCLAPVR	TRUE
				DLLHIGTQAR	TRUE
				DQPLDSSHIASIR	TRUE
				EEALLSVLTER	TRUE
				FMSIAEQMGR	TRUE
				GGPVTVTDANLVLGR	TRUE
				GSILDPSPEAAVVGGNVLTSQR	TRUE
				ILEQEAGMLLPR	TRUE
				ITDPEILESR	TRUE
				LLSEDPANYADAPTEGIR	TRUE
				MGTTVATNALLER	TRUE
				TGDLLEVQQPVDLGALR	TRUE
O14874	BCKDK	1	1	YLQQELPVR	TRUE
O14879	IFIT3	5	5	LSDAQIYVDK	TRUE
				QAIELSPDNQYVK	TRUE
				SEDTAVQHGLEGLSISK	TRUE
				SPCQTDVLR	TRUE
				VCNQIEFLNTEFK	TRUE
O14893	GEMIN2	1	1	SQQLDSNVTMPK	TRUE
O14907	TAX1BP3	3	3	SYIPGQPVTAVVQR	TRUE
				TDKGIYVTR	TRUE
				VSEGGPAEIAGLQIGDK	TRUE
O14908	GIPC1	4	3	DTELAATMVELGK	TRUE
				GPATVEDLPSAFEEK	TRUE
				PGSGPQLGTGR	TRUE
				VDDLLESYMGIR	FALSE
O14920	IKBKB	5	5	ALDDILNLK	TRUE
				DLKPENIVLQQGEQR	TRUE
				GPVSGSPDSMNASR	TRUE
				ITYETQISPR	TRUE
				LGTGGFGNVIR	TRUE
O14925	TIMM23	1	0	YLVQDTDEFILPTGANK	FALSE
O14929	HAT1	2	2	LLVTDMSDAEQYR	TRUE
				YYTEFPTVLDITAEDPSK	TRUE
O14936	CASK	8	8	EINGISVANQTVEQLQK	TRUE
				ETGQQFAVK	TRUE
				FTSSPGLSTEDLK	TRUE
				FTSSPGLSTEDLKR	TRUE
				MLMLDPAER	TRUE
				NTDEPMGITLK	TRUE
				QGTLHVGDEIR	TRUE
				VGDIIQIISK	TRUE
O14950	MYL12B	3	0	ELLTTMGDRFTDEEVDELYR	FALSE
				FTDEEVDELYR	FALSE
				GNFNYIEFTR	FALSE
O14964	HGS	7	7	ACGQIFCGK	TRUE
				ALQNAVTTFVNR	TRUE
				ATSQLLLETDWESILQICDLIR	TRUE
				LYYEGLQDK	TRUE
				VCEPCYEQLNR	TRUE
				VEGHVFPEFK	TRUE
				VVQDTYQIMK	TRUE
O14974	PPP1R12A	13	12	AQLHDTNMELTDLK	TRUE
				ETQTDSISR	TRUE
				ILVDNLCDMEMVNK	TRUE
				ITTGSSSAGTQSSTSNR	TRUE
				LAYVAPTIPR	TRUE
				LKDENGALIR	FALSE
				LSSSLDNKEK	TRUE
				LYEQILAENEK	TRUE
				SGGTALHVAAAK	TRUE
				SLLSSTSTTTK	TRUE
				STQGVTLTDLQEAEK	TRUE
				TGSYGALAEITASK	TRUE
				WIGSETDLEPPVVK	TRUE
O14975	SLC27A2	1	1	MTLVEEGFNPAVIK	TRUE
O14976	GAK	9	9	AIIQEVCFMK	TRUE
				AMLQVNPEER	TRUE
				AVLAVHPDK	TRUE
				AVVMTPVPLFSK	TRUE
				GDLDISYITSR	TRUE
				GPLSCDTVLK	TRUE
				IAVMSFPAEGVESALK	TRUE
				VENLLLSNQGTIK	TRUE
				VIQSVANYAK	TRUE
O14979	HNRNPDL	5	5	GFCFITYTDEEPVK	TRUE
				HVTAQQPSR	TRUE
				QLAPLLPSLAPSSAR	TRUE
				SAAAAAATR	TRUE
				VFVGGLSPDTSEEQIK	TRUE
O14980	XPO1	11	11	DLLGLCEQK	TRUE
				DTDSINLYK	TRUE
				EPEVLSTMAIIVNK	TRUE
				ESPFSTSASPLLSGSQHFDVPPR	TRUE
				MAKPEEVLVVENDQGEVVR	TRUE
				MAQEVLTHLK	TRUE
				NVDILKDPETVK	TRUE
				QMLPLNTNIR	TRUE
				SAFPHLQDAQVK	TRUE
				TSESLCQNNMVILK	TRUE
				VDTILEFSQNMNTK	TRUE
O14981	BTAF1	5	5	AAAQQLGEVVK	TRUE
				ETCAQTLGVVLK	TRUE
				FGDFVSDEVVAPVR	TRUE
				IAAGQAVEAIVK	TRUE
				QDVINTLLPK	TRUE
O14994	SYN3	4	4	QAQSPQPQR	TRUE
				QLMADLVVSK	TRUE
				SPGSPQLSR	TRUE
				VEQAEFSELNLAAYVTGGCMVDMQVVR	TRUE
O15013	ARHGEF10	1	1	QAPSAPETGGAGASEAPAPTGGEDGAGAETTPVAEPTK	TRUE
O15014	ZNF609	2	2	EVGIPAPNAVATLPDNIK	TRUE
				FVTPVPGPQGK	TRUE
O15020	SPTBN2	7	7	DLNAAEALQR	TRUE
				DQADPQCLFLR	TRUE
				GPAPSAMPQSR	TRUE
				IVNTQEQLNHR	TRUE
				LVSQDNFGLELAAVEAAVR	TRUE
				PDLLDFESLK	TRUE
				VDSANALANGLIAGGHAAR	TRUE
O15021	MAST4	1	1	SPSATGQSSFR	TRUE
O15027	SEC16A	17	17	ADSGPTQPPLSLSPAPETK	TRUE
				AQQELVPPQQQASPPQLPK	TRUE
				DSSQGPCEPLPGPLTQPR	TRUE
				FATNEAIQR	TRUE
				FGPGGQLIK	TRUE
				GGIGASENLENPPK	TRUE
				LLPSAPQTLPDGPLASPAR	TRUE
				NPSSAAPVQSR	TRUE
				QALQSTPLGSSSK	TRUE
				QIDSSPVGGETDETTVSQNYR	TRUE
				QSGPGAPNLDR	TRUE
				SPDPGIVPQEAPVGNSLSELSEENFDGK	TRUE
				TMATMGDTLASR	TRUE
				TVPDSEAPPGWDR	TRUE
				VDVINFAQNK	TRUE
				YGPLPGPAVPR	TRUE
				YVDVLNPSGTQR	TRUE
O15031	PLXNB2	14	14	AITEIYLTR	TRUE
				AMTLQEAEAFVGAER	TRUE
				DGATLILSK	TRUE
				EAFEAYTDHATYK	TRUE
				EASPNPEDGIVR	TRUE
				FGAQLQCVTGPQATR	TRUE
				IQPETGPLGGGIR	TRUE
				LQLEQQVATGPALDNK	TRUE
				LQQIAAALENK	TRUE
				LVECGSLFK	TRUE
				QMVQVSDQDMNTHLAEISR	TRUE
				SQLEGLEESVR	TRUE
				SSGGPGAGLCLFPLDK	TRUE
				TLTETDLYCEPPEVQPPPK	TRUE
O15040	TECPR2	3	3	LESPNSGSCSLPER	TRUE
				LGAEDAGLLK	TRUE
				LPGATVSETR	TRUE
O15042	U2SURP	4	4	EGPMFEAMIMNR	TRUE
				ESLCDSPHQNLSR	TRUE
				LYSILQGDSPTK	TRUE
				TIQGHLQSENFK	TRUE
O15047	SETD1A	4	3	EVPVPTPAPVEVPVPER	TRUE
				LIVDPALDPALR	TRUE
				TLPTAGTVGR	TRUE
				VDHDTIIDATK	FALSE
O15056	SYNJ2	5	5	GGASEEALSAVAPR	TRUE
				GLEANAPAFDR	TRUE
				RDPIDPVSAGASAAK	TRUE
				TALQVFDPLAK	TRUE
				TTNAQEAEAAIR	TRUE
O15061	SYNM	39	39	AALEALLGR	TRUE
				AELQELNAR	TRUE
				ATGPAAPPPR	TRUE
				AVSSQTNVR	TRUE
				DYQDLLQVK	TRUE
				EALGLEQLR	TRUE
				EGLWAEGQAR	TRUE
				EGQGGPGSVSVDVK	TRUE
				EGQGGPGSVSVDVKK	TRUE
				EIIFQGPISAAGK	TRUE
				ELQEALGAR	TRUE
				ELYIPSGESEVAGGASHSSGQR	TRUE
				ENLLLEEELR	TRUE
				EREVPISLEVSQDR	TRUE
				ETVQLYEDEVR	TRUE
				EVPISLEVSQDR	TRUE
				EVPVYIGEDSTIAR	TRUE
				GLQTPVKDAGGGTGR	TRUE
				GRLDAELGAQQR	TRUE
				GSQTGTSIGGDAR	TRUE
				LCAQEAEALR	TRUE
				LCAQEAEALRR	TRUE
				LDAELGAQQR	TRUE
				LGPTETETSEHIAIR	TRUE
				MREELSALTR	TRUE
				NDQAVGVSFK	TRUE
				QFTQSPETEASADSFPDTK	TRUE
				SAEQMIGDIINLGLK	TRUE
				SGEFHAEPTVIEK	TRUE
				SPAPGSPDEEGGAEAPAAGIR	TRUE
				SRTQEAGALGVSDR	TRUE
				STFQSVVSESPQEDSAEDTSGAEMTSGVSR	TRUE
				TFSPTYGLLR	TRUE
				TFVLAGSADSPELGK	TRUE
				TGLSLEVATYR	TRUE
				TQEAGALGVSDR	TRUE
				VAAGASESTRSNER	TRUE
				VGDYFATEESVGTQTSVR	TRUE
				YSWQDEIVQGTR	TRUE
O15066	KIF3B	7	3	DYEGPAIAPK	TRUE
				LLQDSLGGNAK	FALSE
				LNLVDLAGSER	FALSE
				SQNQQYLVR	FALSE
				SVGATNMNEHSSR	FALSE
				VNEDPKDALLR	TRUE
				VQAALDAALQDEDEIQVDASSFESTANK	TRUE
O15067	PFAS	9	9	AFSITQGLLK	TRUE
				ATGLGPVDR	TRUE
				ELSDPAGAIIYTSR	TRUE
				FCDNSSAIQGK	TRUE
				FGEPVLAGFAR	TRUE
				IVLVDDRECPVR	TRUE
				SLGLQLPDGQR	TRUE
				VGPGPALMLR	TRUE
				VSVNGAVVLEEPVGELR	TRUE
O15068	MCF2L	3	3	ELENYTDCPELVGR	TRUE
				ELQAEGSEPSVNQDQLDNQATVQR	TRUE
				FLETGAENK	TRUE
O15075	DCLK1	6	6	AVSSLATAK	TRUE
				GGDLFDAITSTNK	TRUE
				GIVYAISPDR	TRUE
				TIYTIDGLK	TRUE
				TLQTLSSEK	TRUE
				TLSDNVNLPQGVR	TRUE
O15084	ANKRD28	2	2	TPLDLAAFK	TRUE
				TVSFEALPIMR	TRUE
O15085	ARHGEF11	7	7	ASNPLAAEFK	TRUE
				DVVAGLTQR	TRUE
				EISDLMLAR	TRUE
				LSSLSSLGDSAPER	TRUE
				NPIHLAFPGPLFMEGLADSALEDVENLR	TRUE
				QPSDASETTGLVQR	TRUE
				SLENPTPPFTPK	TRUE
O15111	CHUK	2	2	GGPVDLTLK	TRUE
				IACTQSSAR	TRUE
O15117	FYB1	7	7	FGTPASLTTR	TRUE
				GSPAPLGVR	TRUE
				INQEELASGTPPAR	TRUE
				QGEQIEIIR	TRUE
				TTAVEIDYDSLK	TRUE
				VTGPNSSSGIQAR	TRUE
				YNTGGNPTEDVSVNSR	TRUE
O15126	SCAMP1	5	5	AQQEFATGVMSNK	TRUE
				DPSVTQVTR	TRUE
				EHALAQAELLK	TRUE
				EMQNLSQHGR	TRUE
				NVPPGLDEYNPFSDSR	TRUE
O15127	SCAMP2	3	3	AASSAAQGAFQGN	TRUE
				ELQNTVANLHVR	TRUE
				TGASFQQAQEEFSQGIFSSR	TRUE
O15143	ARPC1B	6	6	ASSEGGTAAGAGLDSLHK	TRUE
				EVEERPAPTPWGSK	TRUE
				LDVPKQSSQR	TRUE
				NSVSQISVLSGGK	TRUE
				PAPTPWGSK	TRUE
				TWKPTLVILR	TRUE
O15144	ARPC2	8	8	DNTINLIHTFR	TRUE
				DSIVHQAGMLK	TRUE
				ELQAHGADELLK	TRUE
				IIEETLALK	TRUE
				MILLEVNNR	TRUE
				NCFASVFEK	TRUE
				VTVVFSTVFKDDDDVVIGK	TRUE
				YFQFQEEGK	TRUE
O15145	ARPC3	3	3	LIGNMALLPIR	TRUE
				QFMNKSLSGPGQ	TRUE
				VFDPQNDKPSK	TRUE
O15160	POLR1C	5	5	FSPVATASYR	TRUE
				ILLAEVPTMAVEK	TRUE
				LGLIPIHADPR	TRUE
				VLVYNNTSIVQDEILAHR	TRUE
				VVLGEFGVR	TRUE
O15162	PLSCR1	3	3	IIDNMGQEVITLER	TRUE
				SLDEQCVVGK	TRUE
				VYFAAEDTDCCTR	TRUE
O15164	TRIM24	5	5	AVAAAAAASAAASGGPSAAPSGENEAESR	TRUE
				FTGNQIQNR	TRUE
				LMQQQQEVAGLSK	TRUE
				SPSASSVGSR	TRUE
				VIIDTLITK	TRUE
O15173	PGRMC2	3	3	FYGPAGPYGIFAGR	TRUE
				GLGAGAGAGEESPATSLPR	TRUE
				RGLGAGAGAGEESPATSLPR	TRUE
O15194	CTDSPL	1	1	MDGPAIITQVTNPK	TRUE
O15195	VILL	8	8	AGAVALQALK	TRUE
				APDLMQIMEAVLGR	TRUE
				LFQVQGTDSHNTR	TRUE
				LPEEVPSFQPR	TRUE
				LQDELGGQTVLHR	TRUE
				QAGAEAQGAAEAFQQR	TRUE
				SPATPIVLVK	TRUE
				TSSSVSSTSATINGGLR	TRUE
O15204	ADAMDEC1	1	1	VVPSASTTFDNFLR	TRUE
O15211	RGL2	4	3	AGTLEALVR	TRUE
				GVGGGSADLIR	TRUE
				SILVTSQDK	FALSE
				VSCEVEPPGSSDPPAPR	TRUE
O15212	PFDN6	4	4	EELALLDGSNVVFK	TRUE
				ETLAQLQQEFQR	TRUE
				LDYITAEIK	TRUE
				LEAQLTENNIVK	TRUE
O15226	NKRF	2	2	GAVEDVISR	TRUE
				SESHTDLTFSR	TRUE
O15230	LAMA5	33	33	AGALLPAIHEQLR	TRUE
				AHPASNAIDGTER	TRUE
				AIEASNAYSR	TRUE
				ASPDGLCQVSLQQGR	TRUE
				CDIGGALGQSCEPR	TRUE
				CNCPPGLSGER	TRUE
				DLADLAAYTALK	TRUE
				DLGAPQAAAEAELAAAQR	TRUE
				DQASQLLAGTEATLGHAK	TRUE
				EQVLPAGQIVNCDCSAAGTQGNACR	TRUE
				GALDQLCGAGGLCR	TRUE
				GDSCQECAPGFYR	TRUE
				GPPPELQPQPEGPPR	TRUE
				GQLQLVEGNFR	TRUE
				GQYCDICTAANSNK	TRUE
				GSPRPTEDLYCK	TRUE
				GYAQMAPVQPR	TRUE
				IAASATCGEEAPAR	TRUE
				ILLVTDGAR	TRUE
				LAASLDGAR	TRUE
				LAQHEAGLMDLR	TRUE
				LCDELTGQCICPPR	TRUE
				LELEEAATPEGHAVR	TRUE
				LGGQAVGTR	TRUE
				LVGGPVAGGDPNQTIR	TRUE
				MQTFSPAGSK	TRUE
				QATGDYMGVSLR	TRUE
				QEVGVAVHTPQR	TRUE
				SVEVHGAVGASGCPAA	TRUE
				VGFEGATCDR	TRUE
				VQSQLQAMQENVER	TRUE
				VSSYGGTLR	TRUE
				YALVVEYANEDAR	TRUE
O15231	ZNF185	9	9	GGQGDPAVPAQQPADPSTPER	TRUE
				GGQGDPAVPTQQPADPSTPEQQNSPSGSEQFVR	TRUE
				GSSSATSVSAVPADR	TRUE
				LVAPDVEGMR	TRUE
				MSISALGGR	TRUE
				QSSPSGSEQLVR	TRUE
				SEAASGVLR	TRUE
				SQDPPALAR	TRUE
				STGPTQETQAPFIAK	TRUE
O15235	MRPS12	1	1	GVVLCTFTR	TRUE
O15240	VGF	7	7	AYQGVAAPFPK	TRUE
				FGEGVSSPK	TRUE
				LLQQGLAQVEAGR	TRUE
				MPDSGPLPETHK	TRUE
				NAPPEPVPPPR	TRUE
				TLQPPSALR	TRUE
				VNLESPGPER	TRUE
O15243	LEPROT	1	1	VTYDSDATSSACR	TRUE
O15247	CLIC2	3	3	FNVTTVDMTR	TRUE
				FNVTTVDMTRK	TRUE
				IEEFLEQTLAPPR	TRUE
O15254	ACOX3	1	1	ASTVEGGDTALLPEFPR	TRUE
O15258	RER1	2	2	SEGDSVGESVHGKPSVVYR	TRUE
				VDPSLMEDSDDGPSLPTK	TRUE
O15260	SURF4	1	1	SMFAGVPTMR	TRUE
O15264	MAPK13	6	5	ASPQAADLLEK	TRUE
				DLKPGNLAVNEDCELK	FALSE
				EIVNFSPIAR	TRUE
				MLELDVDKR	TRUE
				SYIQSLPQTPR	TRUE
				VTGVPGTEFVQK	TRUE
O15269	SPTLC1	3	3	ALQGISGLK	TRUE
				LLQEIVDQCMNR	TRUE
				YGVGTCGPR	TRUE
O15270	SPTLC2	3	3	DAIVYGQPR	TRUE
				ECVQQLAENTR	TRUE
				VLEEYGAGVCSTR	TRUE
O15294	OGT	8	8	AFLDSLPDVK	TRUE
				ASSVGNVADSTEPTK	TRUE
				ASSVGNVADSTEPTKR	TRUE
				DSGNIPEAIASYR	TRUE
				GSVAEAEDCYNTALR	TRUE
				IIFSPVAPK	TRUE
				ISSPLFNTK	TRUE
				LVSIVADQLEK	TRUE
O15297	PPM1D	2	2	MAGLYSLGVSVFSDQGGR	TRUE
				PSPAALPGGEVSGK	TRUE
O15305	PMM2	7	7	AAPGPALCLFDVDGTLTAPR	TRUE
				IEFYELDKK	TRUE
				IGVVGGSDFEK	TRUE
				NGMLNVSPIGR	TRUE
				TMGYSVTAPEDTR	TRUE
				TMGYSVTAPEDTRR	TRUE
				TMPGGNDHEIFTDPR	TRUE
O15321	TM9SF1	2	2	AGDPVILYVNK	TRUE
				MAESLYEIR	TRUE
O15327	INPP4B	1	1	YSSTEIVEGTR	TRUE
O15344	MID1	5	5	AFDANTMTSAEK	TRUE
				ASVSGPNSPSETR	TRUE
				EIPIEPAPHLR	TRUE
				LIEPIPDSHIR	TRUE
				NTELETLLAK	TRUE
O15347	HMGB3	2	2	NPEVPVNFAEFSK	TRUE
				STNPGISIGDVAK	TRUE
O15355	PPM1G	10	10	ALEDAFLAIDAK	TRUE
				AYTGFSSNSER	TRUE
				EEPGSDSGTTAVVALIR	TRUE
				GTEAGQVGEPGIPTGEAGPSCSSASDK	TRUE
				GTEAGQVGEPGIPTGEAGPSCSSASDKLPR	TRUE
				NLPPEEQMISALPDIK	TRUE
				NTAELQPESGKR	TRUE
				QLIVANAGDSR	TRUE
				VNGGLNLSR	TRUE
				YLPDIIKDQK	TRUE
O15357	INPPL1	11	11	AAAEELLAR	TRUE
				ALQDMSSTAPPAPQPSTR	TRUE
				ASGLGEAGMSAWLR	TRUE
				LDVTLGDLTK	TRUE
				LLLDTLQLSK	TRUE
				SALLPGPLELQPPR	TRUE
				SCSVLQMAK	TRUE
				TIPVQAFEVK	TRUE
				TLSEVDYAPAGPAR	TRUE
				VFDQQSSPMVTR	TRUE
				VLSGLEILSK	TRUE
O15371	EIF3D	7	7	DMPYQPFSK	TRUE
				DNSDFDLLTVSETANEPPQDEGNSFNSPR	TRUE
				GAVIATELK	TRUE
				IFHTVTTTDDPVIR	TRUE
				LGDDIDLIVR	TRUE
				VADWTGATYQDK	TRUE
				YLILKDPNK	TRUE
O15372	EIF3H	5	5	EFTAQNLGK	TRUE
				KEGTGSTATSSSSTAGAAGK	TRUE
				LFKPPQPPAR	TRUE
				LFMAQALQEYNN	TRUE
				TAQGSLSLK	TRUE
O15379	HDAC3	1	1	VSPTNMQGFTK	TRUE
O15382	BCAT2	3	3	EVFGSGTACQVCPVHR	TRUE
				LGGNYGPTVLVQQEALK	TRUE
				PVLIGNEPSLGVSQPTR	TRUE
O15389	SIGLEC5	1	0	MEDTGSYFFR	FALSE
O15393	TMPRSS2	2	2	TSEVLNAAK	TRUE
				VLTQASNPVVCTQPK	TRUE
O15394	NCAM2	3	3	EVVSPQEFK	TRUE
				IIELSQTTAK	TRUE
				VSNDIIQSK	TRUE
O15397	IPO8	6	6	DNIVEGIIR	TRUE
				IAAENELNQSYK	TRUE
				IEQQGGFTFENK	TRUE
				IINFAPSLLR	TRUE
				TALQEVYTLAEHR	TRUE
				YGSPGNVTK	TRUE
O15400	STX7	9	9	ASSRVSGSFPEDSSK	TRUE
				EFGSLPTTPSEQR	TRUE
				ITQCSVEIQR	TRUE
				QLEADIMDINEIFK	TRUE
				QQYTNQLAK	TRUE
				SYTPGVGGDPAQLAQR	TRUE
				TLNQLGTPQDSPELR	TRUE
				VSGSFPEDSSK	TRUE
				VSGSFPEDSSKER	TRUE
O15417	TNRC18	4	4	GLGEPGPSLAAPTPGAR	TRUE
				GPAGPAAQQAAK	TRUE
				GVVDLTQEAR	TRUE
				LGPGLVDQER	TRUE
O15438	ABCC3	8	7	GINLSGGQR	FALSE
				GVVAEFDSPANLIAAR	TRUE
				IDGLNVADIGLHDLR	TRUE
				IQQFLSQEELDPQSVER	TRUE
				MDALCGSGELGSK	TRUE
				QLSALSSDGEGQGR	TRUE
				QLSALSSDGEGQGRPVPR	TRUE
				SPQSFFDTTPSGR	TRUE
O15439	ABCC4	3	3	AENDAQKPSLTR	TRUE
				LNTIIDSDK	TRUE
				VIEYTDLEK	TRUE
O15446	POLR1G	1	1	SALAPNLLTSGK	TRUE
O15455	TLR3	2	2	NSFALVPSLQR	TRUE
				NVDSSPSPFQPLR	TRUE
O15460	P4HA2	5	5	GQEFLRPCGSTEVD	TRUE
				LLSLDPSHER	TRUE
				MQHITGLTVK	TRUE
				QFFPTDEDEIGAAK	TRUE
				TGVLTVASYR	TRUE
O15484	CAPN5	3	3	GGLISASIK	TRUE
				GTSTPEYNVK	TRUE
				VFTDVPSNCR	TRUE
O15488	GYG2	1	1	VESVSSEETFEPSQELPAEALR	TRUE
O15498	YKT6	3	3	GEKLDDLVSK	TRUE
				NDSLAGVVIADNEYPSR	TRUE
				VQAELDETK	TRUE
O15504	NUP42	2	2	PNISGFTDISPEELR	TRUE
				YSNVIQPSSFSK	TRUE
O15511	ARPC5	5	5	ALAAGGVGSIVR	TRUE
				AVQSLDKNGVDLLMK	TRUE
				NPPINTKSQAVK	TRUE
				QGNMTAALQAALK	TRUE
				SKNTVSSAR	TRUE
O15514	POLR2D	2	2	AGDVEEDASQLIFPK	TRUE
				ALIPSLEGR	TRUE
O15523	DDX3Y	2	2	NDPELDQQLANLDLNSEK	TRUE
				QSSGSSSSGFGASR	TRUE
O15530	PDPK1	3	0	AGNEYLIFQK	FALSE
				IGSFDETCTR	FALSE
				TQTESSTPPGIPGGSR	FALSE
O15533	TAPBP	4	4	FVPLPASAK	TRUE
				GAPAPHCEMSR	TRUE
				VSLMPATLAR	TRUE
				WASGLTPAQNCPR	TRUE
O15541	RNF113A	2	2	DTSMGNASSGMVR	TRUE
				VTHNPMIQK	TRUE
O15551	CLDN3	3	2	DFYNPVVPEAQK	TRUE
				STGPGASLGTGYDR	TRUE
				VYDSLLALPQDLQAAR	FALSE
O43143	DHX15	12	11	ASTNAMLISAGLPPLK	TRUE
				IIPLYSTLPPQQQQR	TRUE
				LDLGEDYPSGK	TRUE
				RVAAMSVAQR	TRUE
				SLMSADNVR	TRUE
				SNLGSVVLQLK	TRUE
				TEMQDNTYPEILR	TRUE
				TLATDILMGVLK	TRUE
				VAAMSVAQR	TRUE
				VESLLVTAISK	TRUE
				YGVIILDEAHER	TRUE
				YMTDGMLLR	FALSE
O43148	RNMT	3	3	LVCTDIADVSVK	TRUE
				MQALEPYPANESSK	TRUE
				SVLIGEFLEK	TRUE
O43149	ZZEF1	10	10	EAAAALLPTPPCESLVSR	TRUE
				ESLDQLVQK	TRUE
				FLPTGISSK	TRUE
				GEESVTLEQFR	TRUE
				LDPLEGLDEPTR	TRUE
				LISSTESELQQSYAK	TRUE
				LLPAEVDAAVIK	TRUE
				LPSSSGLPAADVSPATAEEPLSPSTPTR	TRUE
				NTLLNGAAIFFPNR	TRUE
				VNEATAVLYAR	TRUE
O43150	ASAP2	3	3	APTASSFTTR	TRUE
				PNPGSDMNAR	TRUE
				VTSTNPLTPTPPPPVAK	TRUE
O43156	TTI1	2	2	LAGSLVTQAPISAR	TRUE
				TQTVENVEHLQTR	TRUE
O43157	PLXNB1	3	3	GQNLDVVQTPR	TRUE
				GVGGGIPPITTR	TRUE
				LQQIAAAVENK	TRUE
O43166	SIPA1L1	6	5	ASVVGTDGTPK	TRUE
				GSVLEDAIPSTAK	TRUE
				LIDLESPTPESQK	TRUE
				SISSDGRPLER	TRUE
				SQAGSTPLTR	TRUE
				VINAENAAHK	FALSE
O43169	CYB5B	3	3	GQEVETSVTYYR	TRUE
				SGSMATAEASGSDGK	TRUE
				SGSMATAEASGSDGKGQEVETSVTYYR	TRUE
O43172	PRPF4	8	8	ALGEPITLFGEGPAER	TRUE
				APDDLVAPVVK	TRUE
				DVNLASCAADGSVK	TRUE
				FLGTTCYDR	TRUE
				NILSVVGTDALK	TRUE
				QAEVLAEFER	TRUE
				TKAPDDLVAPVVK	TRUE
				TSQMQELHK	TRUE
O43175	PHGDH	9	9	AGTGVDNVDLEAATR	TRUE
				GGIVDEGALLR	TRUE
				GTIQVITQGTSLK	TRUE
				ILQDGGLQVVEK	TRUE
				QADVNLVNAK	TRUE
				QIPQATASMK	TRUE
				TLGILGLGR	TRUE
				VLISDSLDPCCR	TRUE
				VTADVINAAEK	TRUE
O43181	NDUFS4	3	3	EDAVSFAEK	TRUE
				LDITTLTGVPEEHIK	TRUE
				NNMQSGVNNTK	TRUE
O43182	ARHGAP6	2	2	LSSANSLPAGEQDSPR	TRUE
				SVPIQSLSELER	TRUE
O43237	DYNC1LI2	7	7	DAVFIPAGWDNEK	TRUE
				ELAAEDEQVFLMK	TRUE
				GGPASVPSSSPGTSVK	TRUE
				KTGSPGSPGAGGVQSTAK	TRUE
				NILVFGEDGSGK	TRUE
				TGSPGSPGAGGVQSTAK	TRUE
				TVLSNVQEELDR	TRUE
O43242	PSMD3	11	11	AIQLEYSEAR	TRUE
				AVQGFFTSNNATR	TRUE
				ELDTVTLEDIK	TRUE
				EMIDIYSTR	TRUE
				EPQLAFHQR	TRUE
				EQQDLEFAK	TRUE
				FNQVLDQFGEK	TRUE
				ISLADIAQK	TRUE
				LQLDSPEDAEFIVAK	TRUE
				SVFPEQANNNEWAR	TRUE
				TGVRMISLSYSR	TRUE
O43252	PAPSS1	5	5	DIVPVDASYEVK	TRUE
				EGQKPPEGFMAPK	TRUE
				MEIPGSLCK	TRUE
				NLGFSPEDREENVR	TRUE
				TDAETLPALK	TRUE
O43264	ZW10	4	4	ASFVTEVLAHSGR	TRUE
				DSVVLSLLK	TRUE
				LSEDIDLLK	TRUE
				NLMTSEIHNTVK	TRUE
O43278	SPINT1	5	5	EGFINYLTR	TRUE
				GSSGAQATFPQGPSMER	TRUE
				TQGFGGSGIPK	TRUE
				VQPQEPLVLK	TRUE
				YTSGFDELQR	TRUE
O43290	SART1	13	13	ADDLLPLGDQTQDGDFGSR	TRUE
				EAAGTTAAAGTGGATEQPPR	TRUE
				EEPVTADVINPMALR	TRUE
				EGETMILTLK	TRUE
				GLLETTVQK	TRUE
				LASEYLTPEEMVTFK	TRUE
				LEQGGTADGLR	TRUE
				LQAQSLSTVGPR	TRUE
				MSSSDTPLGTVALLQEK	TRUE
				QLQQLQQLR	TRUE
				SLPSAVYCIEDK	TRUE
				SMNANTITK	TRUE
				TPYIVLSGSGK	TRUE
O43291	SPINT2	2	2	NAADSSVPSAPR	TRUE
				TVWSSGDDKEQLVK	TRUE
O43293	DAPK3	4	4	ESLTEDEATQFLK	TRUE
				GALLGTSGLK	TRUE
				LQGVECGLR	TRUE
				VLEEAAAAEEGLR	TRUE
O43294	TGFB1I1	7	7	ASATSATLELDR	TRUE
				DFLQLFAPR	TRUE
				DGAPFCPECYFER	TRUE
				GSLCATCGLPVTGR	TRUE
				GSLDTMLGLLQSDLSR	TRUE
				LMASLSDFR	TRUE
				VQNHLPASGPTQPPVVSSTNEGSPSPPEPTGK	TRUE
O43295	SRGAP3	2	1	FQDLISTIK	TRUE
				GLENPLFPK	FALSE
O43299	AP5Z1	2	2	ATELLTLLK	TRUE
				DANTALPLALR	TRUE
O43301	HSPA12A	5	5	ATAIDIATSK	TRUE
				EIQTLMQFGDTEIK	TRUE
				ETAPTSAYSSPAR	TRUE
				LDLTGTSGTAVPAR	TRUE
				TPTTILLTPER	TRUE
O43310	CTIF	1	1	SPDTLAPVASER	TRUE
O43312	MTSS1	1	1	SSNLAQQAPVR	TRUE
O43314	PPIP5K2	4	4	FFVGPEDTEINPGNYR	TRUE
				SSVYSPESNVR	TRUE
				TAEISSTALR	TRUE
				TPRTLVEQK	TRUE
O43318	MAP3K7	3	3	MITTSGPTSEKPTR	TRUE
				MSADMSEIEAR	TRUE
				SIQDLTVTGTEPGQVSSR	TRUE
O43324	EEF1E1	3	3	AAAAELSLLEK	TRUE
				AIVQQWLEYR	TRUE
				VTQVDGHSSK	TRUE
O43353	RIPK2	3	3	GASGTVSSAR	TRUE
				SLPAPQDNDFLSR	TRUE
				SPSLNLLQNK	TRUE
O43390	HNRNPR	15	12	ANQVNGNAVQLK	TRUE
				DLYEDELVPLFEK	TRUE
				EFNEEGALSVLQQFK	TRUE
				ENILEEFSK	TRUE
				GFCFLEYEDHK	FALSE
				LCDSYEIRPGK	TRUE
				LMMDPLSGQNR	TRUE
				NLATTVTEEILEK	TRUE
				SAFLCGVMK	FALSE
				STAYEDYYYHPPPR	TRUE
				TGYTLDVTTGQR	FALSE
				TKENILEEFSK	TRUE
				TLIEAGLPQK	TRUE
				VTEGLVDVILYHQPDDK	TRUE
				YGGPPPDSVYSGVQPGIGTEVFVGK	TRUE
O43395	PRPF3	6	6	DQTKPTPLILDEQGR	TRUE
				LFEAVEEGR	TRUE
				LGLMPPPEPK	TRUE
				QCPTENMAR	TRUE
				QLSFISPPTPQPK	TRUE
				VLGTEAVQDPTK	TRUE
O43396	TXNL1	5	5	FQGPDNGQGPK	TRUE
				GYMDLMPFINK	TRUE
				IAPAFSSMSNK	TRUE
				IDQYQGADAVGLEEK	TRUE
				SEPTQALELTEDDIKEDGIVPLR	TRUE
O43399	TPD52L2	10	10	AELTKVEEEIVTLR	TRUE
				GLLSDSMTDVPVDTGVAAR	TRUE
				KTQETLSQAGQK	TRUE
				LGLSTLGELK	TRUE
				MDSAGQDINLNSPNK	TRUE
				TPAVEGLTEAEEEELRAELTK	TRUE
				TQETLSQAGQK	TRUE
				TSAALSTVGSAISR	TRUE
				VEEEIVTLR	TRUE
				VTQSDLYKK	TRUE
O43402	EMC8	2	2	ISASLLDSR	TRUE
				VKDASPNQVAEK	TRUE
O43405	COCH	1	1	GVISNSGGPVR	TRUE
O43414	ERI3	1	1	EGLLDPNVK	TRUE
O43426	SYNJ1	5	5	GFEANAPAFDR	TRUE
				SSPNPFITGLTR	TRUE
				TAAPGNPFR	TRUE
				TGMGGATGNK	TRUE
				VTSTEFISLR	TRUE
O43427	FIBP	2	2	DLFVDLVEK	TRUE
				TSELDIFVGNTTLIDEDVYR	TRUE
O43432	EIF4G3	9	9	AAIIADSSTFR	TRUE
				DITEEIMSGGGSR	TRUE
				FSALQPPAPSGSTPSTPVEFDSR	TRUE
				GPDFTPAFADFGR	TRUE
				LDQPANLLR	TRUE
				LSATESIVEIVK	TRUE
				QLTGGVDVER	TRUE
				VDEGGWNTVQGAK	TRUE
				VGVESTLER	TRUE
O43439	CBFA2T2	3	3	AFEVIATER	TRUE
				SADCSVPSPALDK	TRUE
				VCTISPAPR	TRUE
O43447	PPIH	4	4	GPFADENFK	TRUE
				IELFADVVPK	TRUE
				IIDGLLVMR	TRUE
				LPVVISQCGEM	TRUE
O43464	HTRA2	3	3	EPLPTLPLGR	TRUE
				NSSSGISGSQR	TRUE
				SQYNFIADVVEK	TRUE
O43488	AKR7A2	6	4	ALQAAYGASAPSVTSAALR	TRUE
				MDAPASAAAVR	TRUE
				QVETELFPCLR	FALSE
				RMDAPASAAAVR	TRUE
				SQLETSLKR	FALSE
				VASVLGTMEMGR	TRUE
O43490	PROM1	9	9	LICEPYTSK	TRUE
				LSLSQLNSNPELR	TRUE
				MNYDSYLAQTGK	TRUE
				NLQDFAACGIDR	TRUE
				QLPPVDAELDNVNNVLR	TRUE
				QTTTVVAGIK	TRUE
				SSLNDPLCLVHPSSETCNSIR	TRUE
				TDLDGLVQQGYQSLNDIPDR	TRUE
				TLLNETPEQIK	TRUE
O43491	EPB41L2	21	21	APHLQLIEGK	TRUE
				DYFGLLFQESPEQK	TRUE
				EISPGSGPGEIR	TRUE
				EQHPDMSVTR	TRUE
				EVPIVQTETK	TRUE
				FYPPDPSQLTEDITR	TRUE
				GLSPAQADSQFLENAK	TRUE
				GSQPPPAAESQSSLR	TRUE
				IVITGDGDIDHDQALAQAIR	TRUE
				LVSPEQPPK	TRUE
				LVSPEQPPKAK	TRUE
				NFMESTPEPR	TRUE
				SLDGAPIGVMDQSLMK	TRUE
				TEISTKEVPIVQTETK	TRUE
				TEMVTISDASQR	TRUE
				TTEVGSVSEVK	TRUE
				TTEVGSVSEVKK	TRUE
				VEGDNIYVR	TRUE
				VEMQPTELVSK	TRUE
				VITEEMNGKEISPGSGPGEIR	TRUE
				VTLLDGTEYSCDLEK	TRUE
O43493	TGOLN2	2	2	DVPNKSGADGQTPK	TRUE
				SHPEPQTPK	TRUE
O43504	LAMTOR5	3	3	GTLSDEHAGVISVLAQQAAK	TRUE
				LTSDPTDIPVVCLESDNGNIMIQK	TRUE
				MEATLEQHLEDTMK	TRUE
O43505	B4GAT1	4	4	EPGEFALLR	TRUE
				NELVQLYQVGEVR	TRUE
				TALASGGVLDASGDYR	TRUE
				YEAAVPDPR	TRUE
O43516	WIPF1	5	5	ALPATPQLPSR	TRUE
				GAPPLPPIPR	TRUE
				GTALGGGSIR	TRUE
				NLSLSSSTPPLPSPGR	TRUE
				SGPLPPPPPVSR	TRUE
O43520	ATP8B1	8	7	GADTVIYER	TRUE
				GYADLISSGR	TRUE
				LQDGVPETISK	FALSE
				MSLEITDQYLQR	TRUE
				NTSFPLDADK	TRUE
				SPLDAIVADGTAEYR	TRUE
				TDGQLNYQAASPDEGALVNAAR	TRUE
				TQNTITISELGTER	TRUE
O43524	FOXO3	2	2	AALQTAPESADDSPSQLSK	TRUE
				SSSFPYTTK	TRUE
O43556	SGCE	3	3	EVENPQNQLR	TRUE
				QVSTYQEVIR	TRUE
				VPLPINDLK	TRUE
O43566	RGS14	4	4	ELGGTANAALR	TRUE
				FQQIPASDTQQLAQEAR	TRUE
				LQEALQPILEK	TRUE
				LVSSVAAQR	TRUE
O43583	DENR	2	2	AADISESSGADCK	TRUE
				FSCGASVTGEDEIIIQGDFTDDIIDVIQEK	TRUE
O43586	PSTPIP1	3	3	AGGQTEINSLR	TRUE
				GFVPGSYLEK	TRUE
				TTCEAFQLQEFDR	TRUE
O43592	XPOT	5	5	ALAYFEQLK	TRUE
				ASALQDMMR	TRUE
				ILMAIDSELVDR	TRUE
				NAQEALQAIETK	TRUE
				NLLTPLMEK	TRUE
O43598	DNPH1	3	3	FGTVLTEHVAAAELGAR	TRUE
				ILCLFRPQSGR	TRUE
				YFEADPPGQVAASPDPTT	TRUE
O43609	SPRY1	2	2	EIQPTAILSLDQIK	TRUE
				GSNEYTEGPSVVK	TRUE
O43615	TIMM44	4	4	ALSQGVESVKK	TRUE
				ILDIDNVDLAMGK	TRUE
				LGELTGTVK	TRUE
				TEMSEVLTEILR	TRUE
O43617	TRAPPC3	1	1	GALEMVQMAVEAK	TRUE
O43633	CHMP2A	2	2	ANIQAVSLK	TRUE
				SNNSMAQAMK	TRUE
O43639	NCK2	6	6	DSESSPSDFSVSLK	TRUE
				GVEGDFLIR	TRUE
				IYDLNIPAFVK	TRUE
				TEEVIVIAK	TRUE
				TGYVPSNYVER	TRUE
				VQLVDNVYCIGQR	TRUE
O43660	PLRG1	1	1	MPSESAAQSLAVALPLQTK	TRUE
O43665	RGS10	1	1	LQDQIFNLMK	TRUE
O43670	ZNF207	2	2	ETIDAVPNAIPGR	TRUE
				PATLTTTSATSK	TRUE
O43676	NDUFB3	1	1	IEGTPLETIQK	TRUE
O43678	NDUFA2	6	6	AAAAASRGVGAK	TRUE
				ALENVLSGK	TRUE
				ALENVLSGKA	TRUE
				ANPDLPILIR	TRUE
				GVGAKLGLR	TRUE
				YAFGQETNVPLNNFSADQVTR	TRUE
O43679	LDB2	1	0	MVAPPAEPTR	FALSE
O43681	GET3	3	3	LEETLPVIR	TRUE
				LLNFPTIVER	TRUE
				LPLLPHEVR	TRUE
O43684	BUB3	7	7	LNQPPEDGISSVK	TRUE
				LYDVPANSMR	TRUE
				QGYVLSSIEGR	TRUE
				TPCNAGTFSQPEK	TRUE
				VAVEYLDPSPEVQK	TRUE
				VAVEYLDPSPEVQKK	TRUE
				VYTLSVSGDR	TRUE
O43687	AKAP7	1	1	AVQQYLEETQNK	TRUE
O43704	SULT1B1	6	6	FDAIYETEMSK	TRUE
				NYFTVAQNEK	TRUE
				THLPTDLLPK	TRUE
				TSGIEQLEK	TRUE
				TSGIEQLEKNPSPR	TRUE
				VPMLEMTLPGLR	TRUE
O43707	ACTN4	34	21	ACLISLGYDVENDR	TRUE
				AGTQIENIDEDFRDGLK	TRUE
				AIMTYVSSFYHAFSGAQK	FALSE
				ASIHEAWTDGK	FALSE
				DDPVTNLNNAFEVAEK	TRUE
				DGLAFNALIHR	FALSE
				DLLLDPAWEK	FALSE
				DYETATLSDIK	TRUE
				EGLLLWCQR	FALSE
				ELPPDQAEYCIAR	FALSE
				ETTDTDTADQVIASFK	TRUE
				FAIQDISVEETSAK	FALSE
				GISQEQMQEFR	TRUE
				GYEEWLLNEIR	FALSE
				ISIEMNGTLEDQLSHLK	TRUE
				KDDPVTNLNNAFEVAEK	TRUE
				LASDLLEWIR	FALSE
				LSGSNPYTTVTPQIINSK	TRUE
				LSNRPAFMPSEGK	FALSE
				LVSIGAEEIVDGNAK	TRUE
				MAPYQGPDAVPGALDYK	TRUE
				MLDAEDIVNTAR	TRUE
				MLDAEDIVNTARPDEK	TRUE
				MVSDINNGWQHLEQAEK	TRUE
				NFITAEELR	TRUE
				PAFMPSEGK	FALSE
				QFASQANVVGPWIQTK	TRUE
				QLEAIDQLHLEYAK	TRUE
				SFSTALYGESDL	TRUE
				STLPDADRER	TRUE
				TINEVENQILTR	FALSE
				VGWEQLLTTIAR	FALSE
				VLAGDKNFITAEELR	TRUE
				VLAVNQENEHLMEDYEK	TRUE
O43708	GSTZ1	2	2	DFQALNPMK	TRUE
				QPDTPTELRA	TRUE
O43709	BUD23	1	1	EVRPDTQYTGR	TRUE
O43715	TRIAP1	1	1	GDSSGDPCTDLFK	TRUE
O43716	GATC	2	2	LALVDFGSR	TRUE
				VVEEYFVAPPGNISLPK	TRUE
O43719	HTATSF1	1	1	MQELYGDGK	TRUE
O43741	PRKAB2	3	3	DLSSSPPGPYGQEMYAFRSEER	TRUE
				IMVGSTDDPSVFSLPDSK	TRUE
				SDFEVFDALK	TRUE
O43745	CHP2	2	2	ETGFSQASLLR	TRUE
				IIESFFPDGSQR	TRUE
O43747	AP1G1	4	4	ADCASGIFLAAEK	TRUE
				AVEYNALFK	TRUE
				TVQTDHNAVQR	TRUE
				VLTTAGSYVR	TRUE
O43752	STX6	3	3	AVNTAQGLFQR	TRUE
				DQMSTSSVQALAER	TRUE
				SMEDPFFVVK	TRUE
O43760	SYNGR2	3	3	DVLVGADSVR	TRUE
				FLTQPQVVAR	TRUE
				MESGAYGAAK	TRUE
O43761	SYNGR3	2	2	AGAALDPVSFAR	TRUE
				TAPGPATTQAGDAAR	TRUE
O43765	SGTA	5	5	AICIDPAYSK	TRUE
				AIELNPANAVYFCNR	TRUE
				LGNYAGAVQDCER	TRUE
				MGLALSSLNK	TRUE
				TPPSEEDSAEAER	TRUE
O43766	LIAS	1	1	ILVECLTPDFR	TRUE
O43768	ENSA	5	4	NLVTGDHIPTPQDLPQR	TRUE
				PGGSDFLMK	TRUE
				QLPSAGPDK	TRUE
				SSLVTSKLAGGQVE	TRUE
				YFDSGDYNMAK	FALSE
O43772	SLC25A20	1	1	ADQPKPISPLK	TRUE
O43776	NARS1	6	6	EPFPTIYVDSQK	TRUE
				IFDSEEILAGYK	TRUE
				LEDLVCDVVDR	TRUE
				LMTDTINEPILLCR	TRUE
				LTESVDVLMPNVGEIVGGSMR	TRUE
				SPAGSIVHELNPNFQPPK	TRUE
O43795	MYO1B	15	13	EICELTGIDQSVLER	TRUE
				EQLLQSNPVLEAFGNAK	FALSE
				IIIAEVVNK	TRUE
				LEDLATLIQK	TRUE
				LGNIEFKPESR	TRUE
				MPSLSPIDK	TRUE
				PPTAGSQFK	TRUE
				QAYEPCLER	TRUE
				SEVPLVDVTK	TRUE
				SLFPEGNPAK	TRUE
				SLPIYSPEK	TRUE
				SLPIYSPEKVEEYR	TRUE
				VNGVDDAANFR	TRUE
				YLGLLENVR	FALSE
				YNYLSLDSAK	TRUE
O43805	SSNA1	2	2	TIAETEAAYLK	TRUE
				TQQGAALQNYNNELVK	TRUE
O43809	NUDT21	4	4	EPLYEKDSSVAAR	TRUE
				LFLVQLQEK	TRUE
				LPGGELNPGEDEVEGLKR	TRUE
				YIQQTKPLTLER	TRUE
O43813	LANCL1	3	3	AFPNPYADYNK	TRUE
				IDPHAPNEMLYGR	TRUE
				SLAEGYFDAAGR	TRUE
O43815	STRN	10	10	ADEVEALTFPPSSGK	TRUE
				DVDELPSLQPSVGSPSRPSSSR	TRUE
				GLGPLAEAAAAGDGAAAAGAAR	TRUE
				GYTSIFNMETQQR	TRUE
				LLSCSADGTLR	TRUE
				LQDMLANLR	TRUE
				SELTDSASVLDNFK	TRUE
				STSLDVEPIYTFR	TRUE
				SVIDTSTIVR	TRUE
				TCIQEFTAHR	TRUE
O43818	RRP9	3	3	DAVSGLAFR	TRUE
[truncated: 33,959 more rows]

## Sheet: Pulsar Search (Spectronaut)
ProteinId	Gene	Total Number of peptides identified	Number of unique peptides identified	Peptide Sequence	Proteotypic
A0A075B6H7;A0A0C4DH55;P01624	IGKV3-7;IGKV3D-7;IGKV3-15	1	0	LLIYGASTR	FALSE
A0A075B6H9	IGLV4-69	1	1	FSGSSSGAER	TRUE
A0A075B6I0	IGLV8-61	2	2	FSGSILGNK	TRUE
				TLIYSTNTR	TRUE
A0A075B6I9	IGLV7-46	1	1	TLIYDTSNK	TRUE
A0A075B6J1;A0A0A0MRZ9	IGLV5-37;IGLV5-52	1	0	GQGSGVPSR	FALSE
A0A075B6J9	IGLV2-18	1	1	VSWYQQPPGTAPK	TRUE
A0A075B6K0	IGLV3-16	1	1	ITCSGEALPK	TRUE
A0A075B6K4	IGLV3-10	1	1	SGQAPVLVIYEDSK	TRUE
A0A075B6K5	IGLV3-9	3	1	DSNRPSGIPER	TRUE
				FSGSNSGNTATLTISR	FALSE
				ITCGGNNIGSK	FALSE
A0A075B6R9;A0A0C4DH68	IGKV2D-24;IGKV2-24	1	0	FSGSGAGTDFTLK	FALSE
A0A075B6S2;A2NJV5	IGKV2D-29;IGKV2-29	2	0	FSGSGSGTDFTLK	FALSE
				SSQSLLHSDGK	FALSE
A0A075B759;A0A075B767;A0A0B4J2A2;F5H284;P0DN26;P0DN37	PPIAL4E;PPIAL4H;PPIAL4C;PPIAL4D;PPIAL4F;PPIAL4G	1	0	IPKTAENFR	FALSE
A0A0A0MRZ8;P04433	IGKV3D-11;IGKV3-11	1	0	LLIYDASNR	FALSE
A0A0A0MS14	IGHV1-45	1	1	SEDTAMYYCAR	TRUE
A0A0A0MS15;A0A0B4J1V6	IGHV3-49;IGHV3-73	2	0	FTISRDDSK	FALSE
				TEDTAVYYCTR	FALSE
A0A0A0MT36;A0A0C4DH26	IGKV6D-21;IGKV6D-41	1	0	YASQSISGVPSR	FALSE
A0A0B4J1U7	IGHV6-1	1	1	ITINPDTSK	TRUE
A0A0B4J1Y8	IGLV9-49	2	2	FSVLGSGLNR	TRUE
				VGTGGIVGSK	TRUE
A0A0B4J1Y9	IGHV3-72	1	1	TEDTAVYYCAR	TRUE
A0A0B4J2D5;P0DPI2	GATD3B;GATD3	2	0	ITDLANLSAANHDAAIFPGGFGAAK	FALSE
				NLSTFAVDGK	FALSE
A0A0C4DH24	IGKV6-21	1	1	YASQSFSGVPSR	TRUE
A0A0C4DH25	IGKV3D-20	1	1	LLIYDASSR	TRUE
A0A0C4DH29	IGHV1-3	2	1	DTSASTAYMELSSLR	TRUE
				SEDTAVYYCAR	FALSE
A0A0C4DH31	IGHV1-18	1	1	VTMTTDTSTSTAYMELR	TRUE
A0A0C4DH34	IGHV4-28	1	1	VTMSVDTSK	TRUE
A0A0C4DH35	IGHV3-35	1	1	AEDTAVYYCVR	TRUE
A0A0C4DH36	IGHV3-38	2	2	AEGTAVYYCAR	TRUE
				NTLYLQMNNLR	TRUE
A0A0C4DH38	IGHV5-51	2	1	ASDTAMYYCAR	FALSE
				GLEWMGIIYPGDSDTR	TRUE
A0A0C4DH41;P01824;P01825;P06331;P0DP06;P0DP08	IGHV4-61;IGHV4-39;IGHV4-59;IGHV4-34;IGHV4-30-4;IGHV4-38-2	1	0	VTISVDTSK	FALSE
A0A0C4DH42;P01767;P01772;P0DP02	IGHV3-66;IGHV3-53;IGHV3-33;IGHV3-30-3	1	0	NTLYLQMNSLR	FALSE
A0A0C4DH67	IGKV1-8	1	1	MTQSPSSFSASTGDR	TRUE
A0A0G2JS06	IGLV5-39	1	1	SGINVGTYR	TRUE
A0A0J9YX35	IGHV3-64D	2	2	AEDTAVYYCVK	TRUE
				NTLYLQMSSLR	TRUE
A0A0U1RRL7	MMP24OS	1	1	GAPEPAQTQPQPQPQPAAPEGPEQPR	TRUE
A0A1W2PR19	GSTT4	1	1	GYIDINPLR	TRUE
A0A1W2PRP0	FOXL3	1	1	ANQRAWQNSIR	TRUE
A0A2Z4LIS9;P0CG31	FOXO3B;ZNF286B	1	0	SQAAAAAAAPGSR	FALSE
A0A494C071	PWWP4	1	1	AIDPTLGAR	TRUE
A0AV96	RBM47	5	5	LLGVCCSVDNCR	TRUE
				NLMIETTEDTIK	TRUE
				NLMIETTEDTIKK	TRUE
				SFGQFNPGCVER	TRUE
				VPEGVAGAPNEAALLALMER	TRUE
A0AVT1	UBA6	17	17	ACIGDTLCQK	TRUE
				AILSNEATK	TRUE
				DPPEEEIPFCTLK	TRUE
				GMITVTDPDLIEK	TRUE
				IQEFKPSNK	TRUE
				KPNVGCQQDSEELLK	TRUE
				MYSIEPADR	TRUE
				NFALLGVGTSK	TRUE
				NWSQCVELAR	TRUE
				QDVIITALDNVEAR	TRUE
				SYTAADATLK	TRUE
				TVFFESLER	TRUE
				VCPTTETIYNDEFYTK	TRUE
				VTGGYPFEAYK	TRUE
				YGIEPTMVVQGVK	TRUE
				YQCVVLTEMK	TRUE
				YVLGDTAMQK	TRUE
A0FGR8	ESYT2	9	9	AQPPEAGPQGLHDLGR	TRUE
				EPTPSIASDISLPIATQELR	TRUE
				GANTHLSTFSFTK	TRUE
				NLIAFSEDGSDPYVR	TRUE
				SSSSLLASPGHISVK	TRUE
				VDVGQQPLR	TRUE
				VGNQIFQSR	TRUE
				VLVALASEELAK	TRUE
				VPLSQLLTSEDMTVSQR	TRUE
A0M8Q6	IGLC7	1	1	VGVETTKPSK	TRUE
A0MZ66	SHTN1	6	6	ILAIELENLK	TRUE
				LVEVIEEVNK	TRUE
				QLQLITSLK	TRUE
				SMPVLGSVSSVTK	TRUE
				TVLNSEVLEQR	TRUE
				VTAEADSSSPTGILATSESK	TRUE
A1A4S6	ARHGAP10	1	1	GLIPQNYVK	TRUE
A1A5B4	ANO9	3	3	ADNSVFGLYR	TRUE
				LSETCTFAK	TRUE
				QQQFLEELR	TRUE
A1A5D9	BICDL2	2	2	ALSELSEQNLR	TRUE
				ELSASASSSTPR	TRUE
A1IGU5	ARHGEF37	1	1	LLEVGSVTYQEEAAR	TRUE
A1L0T0	ILVBL	3	3	TDFRDGSIAV	TRUE
				VLHDAQQQCR	TRUE
				VRDIVPTLR	TRUE
A1L170	C1orf226	2	2	LDPPPPITR	TRUE
				SVLQETFPR	TRUE
A1L188	NDUFAF8	2	2	CVQASTAPGGR	TRUE
				LAACGAEAAAYGR	TRUE
A1L390	PLEKHG3	2	2	SIVEDYLLK	TRUE
				SSSVLSLEGSEK	TRUE
A1L4H1	SSC5D	4	4	ELGCGGPQQPDPAAGR	TRUE
				GLGQLGEAVK	TRUE
				LADGPHGCAGR	TRUE
				LTQVVEQER	TRUE
A1X283	SH3PXD2B	9	9	AAAASVPNADGLK	TRUE
				EKELLSSQR	TRUE
				FEGRPVPDGDAK	TRUE
				GAVVEVIQK	TRUE
				SFLPGEGPGR	TRUE
				SLLDGEGPQAVGGQDVAFSR	TRUE
				TDLPEEKPDATPQNPFLK	TRUE
				TEPPQGEDQVDICNLR	TRUE
				YTVIYPYTAR	TRUE
A1Z1Q3	MACROD2	1	1	AAGPCLLAECR	TRUE
A2RRD8;Q96IR2	ZNF320;ZNF845	1	0	ALSQGLLTFR	FALSE
A2RRP1	NBAS	8	8	AQDLHLFETLK	TRUE
				AVQEDEVGVPGSNSADLLR	TRUE
				DIVQSAIMK	TRUE
				NQNIVLSAR	TRUE
				QVDCALSLIR	TRUE
				STTPEELYQR	TRUE
				VLSGSPYYK	TRUE
				VLSNTTTTTK	TRUE
A2RTX5	TARS3	4	4	AAEALAAEAVASR	TRUE
				GDTSNIITVR	TRUE
				NELSGTLSGLTR	TRUE
				VNTATTTVYR	TRUE
A2RUC4	TYW5	3	3	AGQHLPVPR	TRUE
				SEVLNIDNPDLAK	TRUE
				TLPFDQLVQR	TRUE
A2RUS2	DENND3	1	1	LFEALTVGQEK	TRUE
A3KMH1	VWA8	11	11	ELSLYDGSR	TRUE
				ENVVVIHPDFR	TRUE
				EVEYIALSR	TRUE
				IILDNLQAK	TRUE
				LLSQPCASDR	TRUE
				LVAAFGELR	TRUE
				QYGPNVPEPILQK	TRUE
				SSPLVNAALEGK	TRUE
				TLILEGLEK	TRUE
				VNAGTLAVLQR	TRUE
				YSGNPLDPPLR	TRUE
A3KN83	SBNO1	4	3	EFSDFIQAVER	TRUE
				VEGVLASVSGTNVK	TRUE
				VVSNDDGSISYESR	TRUE
				VVYASATGASEPR	FALSE
A4D161	FAM221A	1	1	APLPSATKPS	TRUE
A4D1E9	GTPBP10	2	2	FVAGVGANSK	TRUE
				GGSGGMGYPR	TRUE
A4D1P6	WDR91	5	5	LGDSELAMVCSQR	TRUE
				LLLLGSGVGTVR	TRUE
				LSPAQGPPQPQSSAK	TRUE
				NASLSQSPR	TRUE
				VGFLSSLLPQSK	TRUE
A4D1U4	DENND11	2	2	EPEEPAAPEVLLQPGR	TRUE
				VEQGDAAPLLR	TRUE
A4D2B0	MBLAC1	2	2	ADGSVTLVLPQTR	TRUE
				GPILVDTGGPWAR	TRUE
A4FU01	MTMR11	4	4	DSPSLLAVSSR	TRUE
				FDVATSLPR	TRUE
				LEAVSGLSR	TRUE
				VPDTLTFLR	TRUE
A4FU69	EFCAB5	1	1	YILEIENVR	TRUE
A4UGR9	XIRP2	2	2	QGNMYTLSK	TRUE
				TVSVNEIQK	TRUE
A5A3E0	POTEF	1	1	VAPEEHPVLLTEATLNPK	TRUE
A5D8V6	VPS37C	1	1	NLEFQGPLEISR	TRUE
A5D8V7	ODAD3	1	1	LLDLLKGDEK	TRUE
A5PLN9	TRAPPC13	2	2	AYLQPMDTR	TRUE
				MAPGYGDVR	TRUE
A5YKK6	CNOT1	18	18	ASQQEIQHIVNR	TRUE
				AVQELVHPVVDR	TRUE
				ELNPSLNFK	TRUE
				EVTAAQVAR	TRUE
				GNAPEGLPQLMEVVR	TRUE
				IAMTTCEQIVR	TRUE
				ILPDSGGVAK	TRUE
				IVEPPENIQEK	TRUE
				LAEVGQYEQVK	TRUE
				LGTSGLNQPTFQQSK	TRUE
				LPDPFTPNLK	TRUE
				NLDEQLSAPK	TRUE
				NLILSAFPR	TRUE
				QPPPGVMPK	TRUE
				SNLQVSNEPGNR	TRUE
				SNYEAMIDR	TRUE
				SPVTFLSDLR	TRUE
				VDMLSEINIAPR	TRUE
A6NC98	CCDC88B	11	11	AEPQLVETQNVR	TRUE
				AQELLLQSQR	TRUE
				AQLEMQSQQLR	TRUE
				EALVEALAAAGR	TRUE
				IQAPQLLGGETEGR	TRUE
				LSDGALLLR	TRUE
				SSESFSPGDTPR	TRUE
				SSLQSPASVAPPQGPGTK	TRUE
				VLEPVPLPR	TRUE
				VLGIIAPSSR	TRUE
				VLSGVLEASK	TRUE
A6NCS6	C2orf72	1	1	AAGAAGAAAAAAR	TRUE
A6ND36	FAM83G	1	1	TVPVADVLAR	TRUE
A6ND91	ASPDH	1	1	GALWGAEDIR	TRUE
A6NDG6	PGP	5	5	AAAEAGGDDAR	TRUE
				FIAGTGCLVR	TRUE
				GETAVPGAPEALR	TRUE
				LGFITNNSSK	TRUE
				QADIIGKPSR	TRUE
A6NDR6;O00470;O14770;Q99687	MEIS3P1;MEIS1;MEIS2;MEIS3	1	0	IVQPMIDQSNR	FALSE
A6NDU8	RIMOC1	1	1	AAAVSSVVR	TRUE
A6NFI3	ZNF316	3	3	AALHTTPDSPAAQLER	TRUE
				FGQSAALTR	TRUE
				SFSQSSALAR	TRUE
A6NFN3;O43251;Q9NWB1	RBFOX3;RBFOX2;RBFOX1	2	0	IEVNNATAR	FALSE
				KIEVNNATAR	FALSE
A6NGB9	WIPF3	1	1	TPLVSPPGPLTK	TRUE
A6NGS2	ERICH4	1	1	EVSPVEIPGQTLR	TRUE
A6NHC0	CAPN8	1	1	AAQAAGVSR	TRUE
A6NHL2	TUBAL3	2	2	SFGGGTGSGFTSLLMER	TRUE
				SLFHPEQLLSGK	TRUE
A6NHR9	SMCHD1	6	6	EINITSALAEK	TRUE
				GLAPIECYNR	TRUE
				LQIFSVEGQK	TRUE
				SLNSDISYFGVGGK	TRUE
				TTFQENTQSISVR	TRUE
				VQLISGPPAK	TRUE
A6NI72;A8MVU1;P14598	NCF1B;NCF1C;NCF1	2	0	EMFPIEAGAINPENR	FALSE
				STATDITGPIILQTYR	FALSE
A6NIH7	UNC119B	3	3	AAAAASAAGPGGLVAGK	TRUE
				LMIENPYETR	TRUE
				SDSFYFVDNK	TRUE
A6NJ78	METTL15	1	1	VLSPQDQDVQDNPR	TRUE
A6NJG2	SOWAHD	2	2	APTASLAPTSQSLR	TRUE
				AQLGGAANR	TRUE
A6NK44	GLOD5	1	1	ACDVPIEEGPVPR	TRUE
A6NM11;A6NMS7;O60309	LRRC37A2;LRRC37A;LRRC37A3	1	0	LLSGQQEVK	FALSE
A7E2V4	ZSWIM8	2	2	APVSESLSR	TRUE
				LAVLDPALSPQR	TRUE
A7KAX9	ARHGAP32	5	5	FSQLSELPR	TRUE
				GADVPEIPGDLTLK	TRUE
				ITSVPLDSEK	TRUE
				LSGVASNIQR	TRUE
				YAASGQESLR	TRUE
A8CG34;Q96HA1	POM121C;POM121	2	0	NAITSSYSSTR	FALSE
				SPAAAAAGAGER	FALSE
A8K2U0	A2ML1	1	1	SSSNMAIVEVK	TRUE
A8K7I4	CLCA1	22	22	ALGGVNAAR	TRUE
				ASNATLPPITVTSK	TRUE
				ASVTALIESVNGK	TRUE
				CSAGITGTNVVK	TRUE
				GCEFVLQSR	TRUE
				IHLTPDFIAGK	TRUE
				ISTSILDLR	TRUE
				KLAEYGPQGR	TRUE
				LAEYGPQGR	TRUE
				LPAAASGGTSICSGLR	TRUE
				MAYLQIPGIAK	TRUE
				NADVLVAESTPPGNDEPYTEQMGNCGEK	TRUE
				NVAILIPETWK	TRUE
				QGGFVVDKNTK	TRUE
				QSGAIIHTVALGPSAAQELEELSK	TRUE
				RLPAAASGGTSICSGLR	TRUE
				SGSMATGNR	TRUE
				TSSGGSFVASDVPNAPIPDLFPPGQITDLK	TRUE
				TTPMTTQPPNPTFSLLQIGQR	TRUE
				TVTLELLDNGAGADATK	TRUE
				VDLKSEISNIAR	TRUE
				YFTTYDTNGR	TRUE
A8K8P3	SFI1	1	1	QLLLEGLAR	TRUE
A8MPS7	YDJC	1	1	EAVAAGDVDLPQVR	TRUE
A8MVS5	HIDE1	1	1	GGQVVQLLQAPTDQR	TRUE
A8MWD9;P62308	SNRPGP15;SNRPG	2	0	GNSIIMLEALER	FALSE
				SKAHPPELK	FALSE
A8MXV4	NUDT19	3	3	FGLGPAPFSR	TRUE
				SSSLRPGPSR	TRUE
				TDNTGTLPEDVAFR	TRUE
A8MZ97	C2orf74	1	1	EVLATPLENR	TRUE
A9UHW6	MIF4GD	3	3	IQSFDAETQQLLK	TRUE
				LAQPDSLSK	TRUE
				TALKDPGAVDLEK	TRUE
B0I1T2	MYO1G	8	8	AMWPDGQQDITEVTK	TRUE
				DYLSSATDNPTASSLFAQR	TRUE
				LISVEPRPEQPEPDFR	TRUE
				LLYNSTDPTLR	TRUE
				TLVTLEQSR	TRUE
				VAAMGALQGLR	TRUE
				VIGFSPEEVESVHR	TRUE
				VSDCIPLSHR	TRUE
B5ME19;Q99613	EIF3CL;EIF3C	14	0	CLEEFELLGK	FALSE
				DAHNALLDIQSSGR	FALSE
				DFESHITSYK	FALSE
				ELLGQGLLLR	FALSE
				FEELTNLIR	FALSE
				GCILTLVER	FALSE
				GTEITHAVVIK	FALSE
				LGSLVENNER	FALSE
				QGTYGGYFR	FALSE
				QLTPPEGSSK	FALSE
				QPLLGPPESMR	FALSE
				SIVDKEGVPR	FALSE
				TCHSFIINEK	FALSE
				TEPTAQQNLALQLAEK	FALSE
B7ZAP0	RABGAP1L	1	1	TATGTQPLQPAPVTQPPK	TRUE
B7ZAQ6;P0CG08	GPR89A;GPR89B	1	0	NVTDTDILALER	FALSE
B7ZBB8	PPP1R3G	1	1	LSLEAPGPAPFR	TRUE
B7ZW38;O60812;P0DMR1	HNRNPCL3;HNRNPCL1;HNRNPCL4	1	0	MIASQVVDINLAAEPK	FALSE
B9A064;P0CG04;P0DOX8	IGLL5;IGLC1;	2	0	AGVETTKPSK	FALSE
				ANPTVTLFPPSSEELQANK	FALSE
C0HLS1	SCRIB	1	1	AAQAFFPAAELAQAGPER	TRUE
C4AMC7;Q6VEQ5;Q9NQA3	WASH3P;WASH2P;WASH6P	3	0	GPGAGEGPGGAFAR	FALSE
				LFDAPLSISK	FALSE
				YVFLDPLAGAVTK	FALSE
C9J798;O43374	RASA4B;RASA4	3	0	ELSGGAEAGTVPTSPGK	FALSE
				TLSLQAPPVK	FALSE
				TSETNTLFR	FALSE
C9JI98	TMEM238	2	2	APPPPAAGSR	TRUE
				LQLATLEAGPGAAGAGSE	TRUE
C9JLW8	MCRIP1	1	1	SPPSSSEIFTPAHEENVR	TRUE
E9PAV3	NACA	5	1	DIELVMSQANVSR	FALSE
				GAPTTPAATPPSPK	TRUE
				IEDLSQQAQLAAAEK	FALSE
				NNSNDIVNAIMELTM	FALSE
				SPASDTYIVFGEAK	FALSE
E9PRG8	C11orf98	2	2	TAMEVEAPSKPAR	TRUE
				VVGAVIDQGLITR	TRUE
G9CGD6;Q8WWN9	CNK3/IPCEF1;IPCEF1	2	0	ADGFVNLPDFTVER	FALSE
				SLEQASLSPLGDR	FALSE
L0R819	ASDURF	3	3	IVVDELSNLK	TRUE
				IVVDELSNLKK	TRUE
				QQQNSNIFFLADR	TRUE
O00115	DNASE2	2	2	ALINSPEGAVGR	TRUE
				YLDESSGGWR	TRUE
O00116	AGPS	4	4	AASAATAAPTATPAAQESGTIPK	TRUE
				EYVDPNNIFGNR	TRUE
				GISDPLTVFEQTEAAAR	TRUE
				TIISLDTSQMNR	TRUE
O00139	KIF2A	4	4	DLDVITIPSK	TRUE
				FSLIDLAGNER	TRUE
				LIDIGNSCR	TRUE
				QQVQVVGLQER	TRUE
O00142	TK2	2	2	GSPASGPGPR	TRUE
				MLELFEQNR	TRUE
O00148	DDX39A	5	2	DFLLKPELLR	FALSE
				FMQDPMEVFVDDETK	TRUE
				GLAITFVSDENDAK	FALSE
				ILVATNLFGR	FALSE
				NCPHVVVGTPGR	TRUE
O00151	PDLIM1	12	12	CGTGIVGVFVK	TRUE
				DFEQPLAISR	TRUE
				GCTDNLTLTVAR	TRUE
				GDPNKPSGFR	TRUE
				LVGGKDFEQPLAISR	TRUE
				SAMPFTASPASSTTAR	TRUE
				TTQQIDLQGPGPWGFR	TRUE
				VAASIGNAQK	TRUE
				VITNQYNNPAGLYSSENISNFNNALESK	TRUE
				VTPPEGYEVVTVFPK	TRUE
				VWSPLVTEEGK	TRUE
				VWSPLVTEEGKR	TRUE
O00154	ACOT7	4	4	LMDEVAGIVAAR	TRUE
				MIEEAGAIISTR	TRUE
				SLPVPQLVPETEDEK	TRUE
				VLEVPPVVYSR	TRUE
O00159	MYO1C	21	21	ALQVELVPTGEIIR	TRUE
				DGTIDFTPGSELLITK	TRUE
				DNYPQSVPR	TRUE
				DQAVMISGESGAGK	TRUE
				GDVVLQSDHVIETLTK	TRUE
				GEELLSPLNLEQAAYAR	TRUE
				GVSFYEVPPHLFAVADTVYR	TRUE
				IICDLVEEK	TRUE
				LALGSDGVR	TRUE
				LGTDEISPR	TRUE
				LLQFYAETCPAPER	TRUE
				LLQSNPVLEAFGNAK	TRUE
				LLSVEGSTLR	TRUE
				NPIMSQCFDR	TRUE
				NPQSYLYLVK	TRUE
				QLLLTPNAVVIVEDAK	TRUE
				RDQAVMISGESGAGK	TRUE
				TLFATEDALEVR	TRUE
				VLQALGSEPIQYAVPVVK	TRUE
				VTMESALTAR	TRUE
				YLGLLENLR	TRUE
O00160	MYO1F	12	12	AVNMEPDQYQMGSTK	TRUE
				EEASNILLNK	TRUE
				ERVDFADSVTK	TRUE
				GFGDLAVLK	TRUE
				GPPSTSLGASR	TRUE
				NPESLFLLEEVR	TRUE
				TEFVSLLCK	TRUE
				TLTVSVGDGLPK	TRUE
				VDFADSVTK	TRUE
				VSYDVSGFCER	TRUE
				VVCDLIENK	TRUE
				YAILTPETWPR	TRUE
O00161	SNAP23	8	8	DMALNIGNEIDAQNPQIK	TRUE
				DRIDIANAR	TRUE
				IEEGLDQINK	TRUE
				ILGLAIESQDAGIK	TRUE
				ITDKADTNR	TRUE
				MDNLSSEEIQQR	TRUE
				TITMLDEQK	TRUE
				TITMLDEQKEQLNR	TRUE
O00165	HAX1	2	2	IFGGVLESDAR	TRUE
				ITKPDGIVEER	TRUE
O00170	AIP	6	6	AVPLIHQEGNR	TRUE
				EGEIAQFLCDIK	TRUE
				GELPDFQDGTK	TRUE
				NIAVGKDPLEGQR	TRUE
				VLELDPALAPVVSR	TRUE
				YYDAIACLK	TRUE
O00175	CCL24	1	1	VVSYQLSSR	TRUE
O00178	GTPBP1	7	7	DDVIVTASNFSSER	TRUE
				GGQTASFALK	TRUE
				LVLVSPTSEQYDSLLR	TRUE
				SAMDSPVPASMFAPEPSSPGAAR	TRUE
				SQGACVTPASGC	TRUE
				VAVVGNVDAGK	TRUE
				VGDNDFLEVR	TRUE
O00186	STXBP3	3	3	IMLLDEFTTK	TRUE
				SAEETFQLSR	TRUE
				VLLPVLLNK	TRUE
O00187	MASP2	1	1	LASPGFPGEYANDQER	TRUE
O00192	ARVCF	1	1	GGGPVATLSR	TRUE
O00193	SMAP	1	1	INEELESQYQQSMDSK	TRUE
O00194	RAB27B	1	1	LLALGDSGVGK	TRUE
O00203	AP3B1	12	11	ALKDPNQLIR	TRUE
				EASADLSPYVR	TRUE
				EGSTAQLIINTEK	TRUE
				ELKPVLSQG	TRUE
				LLDSITVPVAR	TRUE
				LYSLDPEQK	TRUE
				NASELFPAVVK	TRUE
				NTKPLLQSR	FALSE
				NVEVIELAK	TRUE
				QFAAATIQTIGR	TRUE
				TVIGSVLLR	TRUE
				VVNVANVGAVPSGQDNIHR	TRUE
O00204	SULT2B1	1	1	DPGTPDQFLR	TRUE
O00213	APBB1	1	1	LQATAVGPK	TRUE
O00214	LGALS8	3	3	IDTLGIYGK	TRUE
				LNTPMGPGR	TRUE
				SFNVDLLAGK	TRUE
O00217	NDUFS8	4	4	EPATINYPFEK	TRUE
				LCEAICPAQAITIEAEPR	TRUE
				TLLWTELFR	TRUE
				YVNMQDPEMDMK	TRUE
O00231	PSMD11	14	14	AAAAVVEFQR	TRUE
				AELRDDPIISTHLAK	TRUE
				AQSLLSTDR	TRUE
				DDPIISTHLAK	TRUE
				DIQENDEEAVQVK	TRUE
				EASIDILHSIVK	TRUE
				EQSILELGSLLAK	TRUE
				IMLNTPEDVQALVSGK	TRUE
				LYDNLLEQNLIR	TRUE
				TGQAAELGGLLK	TRUE
				TTANAIYCPPK	TRUE
				TYHALSNLPK	TRUE
				VQIEHISSLIK	TRUE
				YQEALHLGSQLLR	TRUE
O00232	PSMD12	7	7	AIYDTPCIQAESEK	TRUE
				GSLESPATDVFGSTEEGEKR	TRUE
				LFTTMELMR	TRUE
				LNSLMSLVNK	TRUE
				MEVDYSATVDQR	TRUE
				TASDMVSTSR	TRUE
				VEFILEQMR	TRUE
O00233	PSMD9	6	6	ANYDVLESQK	TRUE
				GIGMNEPLVDCEGYPR	TRUE
				GLLGCNIIPLQR	TRUE
				KLGQSESQGPPR	TRUE
				LGQSESQGPPR	TRUE
				SDVDLYQVR	TRUE
O00244	ATOX1	1	1	YDIDLPNKK	TRUE
O00255	MEN1	2	2	GAVDLSLYPR	TRUE
				GLGTGQGAVSGPPR	TRUE
O00257	CBX4	1	1	SNVLTGLQDSSTDNR	TRUE
O00264	PGRMC1	6	5	DFTPAELRR	TRUE
				FYGPEGPYGVFAGR	TRUE
				GLATFCLDK	FALSE
				KFYGPEGPYGVFAGR	TRUE
				RDFTPAELR	TRUE
				RFDGVQDPR	TRUE
O00267	SUPT5H	13	13	DNELIGQTVR	TRUE
				DTYLDTQVVGQTGVIR	TRUE
				DVTNFTVGGFAPMSPR	TRUE
				EATGVLLSIDGEDGIVR	TRUE
				ETFQVLNMYGK	TRUE
				FEGDTGLIVR	TRUE
				QAIEGVGNLR	TRUE
				SVTGGMCSVYLK	TRUE
				SVVAPEHVK	TRUE
				TPAQSGAWDPNNPNTPSR	TRUE
				TPMYGSQTPLQDGSR	TRUE
				VELHSTCQTISVDR	TRUE
				VVSISSEHLEPITPTK	TRUE
O00268	TAF4	3	2	DANLTALAAIGPR	FALSE
				FFEQLDQIEK	TRUE
				TPTATTSGIR	TRUE
O00273	DFFA	10	10	AAFGEEVDAVDTGISR	TRUE
				ACDILAIDK	TRUE
				ASPPGDLQNPK	TRUE
				EQHGVAASCLEDLR	TRUE
				ETSSDVALASHILTALR	TRUE
				FVALASNEK	TRUE
				LQHTLQQVLDQR	TRUE
				LQQTQSLHSLR	TRUE
				MEVTGDAGVPESGEIR	TRUE
				QAPELSLSSQDLELVTK	TRUE
O00287	RFXAP	1	1	SPEVVQFLQK	TRUE
O00291	HIP1	7	7	ADKDSPNLAQLQQASR	TRUE
				AIGEELLPR	TRUE
				AINTQEVAVK	TRUE
				APPEPADSLTEACK	TRUE
				FPGNLQMSDR	TRUE
				LASTEESMCQLAK	TRUE
				VLELENELQK	TRUE
O00299	CLIC1	11	11	AEEQPQVELFVK	TRUE
				EEFASTCPDDEEIELAYEQVAK	TRUE
				FLDGNELTLADCNLLPK	TRUE
				GFTIPEAFR	TRUE
				GVTFNVTTVDTK	TRUE
				IGNCPFSQR	TRUE
				KFLDGNELTLADCNLLPK	TRUE
				LAALNPESNTAGLDIFAK	TRUE
				LHIVQVVCK	TRUE
				NSNPALNDNLEK	TRUE
				VLDNYLTSPLPEEVDETSAEDEGVSQR	TRUE
O00303	EIF3F	6	6	AYVSTLMGVPGR	TRUE
				FLMSLVNQVPK	TRUE
				TMGVMFTPLTVK	TRUE
				VIGLSSDLQQVGGASAR	TRUE
				VIGTLLGTVDK	TRUE
				VSADNTVGR	TRUE
O00308	WWP2	2	1	AGVALPFEK	TRUE
				LLQFVTGTCR	FALSE
O00327	BMAL1	1	1	TDITPGPSR	TRUE
O00329	PIK3CD	1	1	MTPYGCLPTGDR	TRUE
O00330	PDHX	4	4	GIQEIADSVK	TRUE
				HSLDASQGTATGPR	TRUE
				QLITVTMSSDSR	TRUE
				VSVNDFIIK	TRUE
O00338	SULT1C2	1	1	IVQETSFEK	TRUE
O00339	MATN2	4	4	AAIVFTDGR	TRUE
				SLGEENFEVVK	TRUE
				VGLLQYGSTVK	TRUE
				YLFEEDNLLR	TRUE
O00391	QSOX1	10	10	AAPGQEPPEHMAELQR	TRUE
				DFNIPGFPTVR	TRUE
				DVQNVAAAPELAMGALELESR	TRUE
				EVALDLSQHK	TRUE
				LAGAPSEDPQFPK	TRUE
				LEEIDGFFAR	TRUE
				RVLNTEANVVR	TRUE
				SALYSPSDPLTLLQADTVR	TRUE
				SFYTAYLQR	TRUE
				VLNTEANVVR	TRUE
O00400	SLC33A1	1	1	EALLGDTGTGDFLK	TRUE
O00401	WASL	3	3	GAPPPPPSR	TRUE
				QAPPPPPPSR	TRUE
				SSVQQQPPPPR	TRUE
O00410	IPO5	14	13	EGFVEYTEQVVK	FALSE
				ENVNATENCISAVGK	TRUE
				FLFDSVSSQNVGLR	TRUE
				HIVENAVQK	TRUE
				LCGDTSLNNMQR	TRUE
				MLVQCMQDQEHPSIR	TRUE
				SLVEIADTVPK	TRUE
				STACQMLVCYAK	TRUE
				TKENVNATENCISAVGK	TRUE
				VAAAESMPLLLECAR	TRUE
				VCDIAAELAR	TRUE
				VIAALLQTMEDQGNQR	TRUE
				VIQSADSKTK	TRUE
				YAACNAVGQMATDFAPGFQK	TRUE
O00418	EEF2K	1	1	AFDSGQNLSPDR	TRUE
O00422	SAP18	4	4	AVESRVTQEEIK	TRUE
				EIGSTMSGR	TRUE
				KGTDDSMTLQSQK	TRUE
				VKEIGSTMSGR	TRUE
O00423	EML1	7	7	GDVILIGTTR	TRUE
				ITIATGQVAGTSK	TRUE
				KETAVPATK	TRUE
				LLSTGDDFGK	TRUE
				LNITEEQQAVLNR	TRUE
				QVVSVETTR	TRUE
				VQMQEDDIQLLK	TRUE
O00425	IGF2BP3	2	1	ALQSGPPQSR	TRUE
				MVIITGPPEAQFK	FALSE
O00429	DNM1L	13	13	ALQGASQIIAEIR	TRUE
				DTLQSELVGQLYK	TRUE
				GVSPEPIHLK	TRUE
				KNIQDSVPK	TRUE
				LGIIGVVNR	TRUE
				LYTDFDEIR	TRUE
				MEALIPVINK	TRUE
				SATLLQLITK	TRUE
				SKPIPIMPASPQK	TRUE
				SQLDINNKK	TRUE
				SSVLESLVGR	TRUE
				VPSALAPASQEPSPAASAEADGK	TRUE
				YIETSELCGGAR	TRUE
O00442	RTCA	4	4	AFVAGVLPFK	TRUE
				DLYVNIQPVQEPK	TRUE
				QLNPINLTER	TRUE
				VEVDGSIMEGGGQILR	TRUE
O00443	PIK3C2A	5	5	EGQIEPSFVFR	TRUE
				LIESSLGSIATK	TRUE
				SLSVATVTR	TRUE
				TADVTSLFGGEDTSR	TRUE
				VSNLQVSPK	TRUE
O00453	LST1	1	1	LPVPSSEGPDLR	TRUE
O00459	PIK3R2	4	3	AGPEGFQYR	TRUE
				APGPGPPPAAR	TRUE
				TAIEAFNETIK	FALSE
				TQAEEMLSGK	TRUE
O00461	GOLIM4	2	2	EAANLLEGHAR	TRUE
				LAVQQVEEAQQLR	TRUE
O00462	MANBA	3	3	LPQSTDPLR	TRUE
				TVELIEEPIK	TRUE
				VNLILEGVDTVSK	TRUE
O00468	AGRN	20	20	ALGPAGCEADASAPATCAEMR	TRUE
				EAACLQQTQIEEAR	TRUE
				EPLYVGGAPDFSK	TRUE
				FDGPCDPCQGALPDPSR	TRUE
				FGALCEAETGR	TRUE
				GDFVSLALR	TRUE
				LELGIGPGAATR	TRUE
				LPSSAVTPR	TRUE
				QVDVTSFAGHPCTR	TRUE
				SADGLTASCLCPATCR	TRUE
				SAGDVDTLAFDGR	TRUE
				SELFGETAR	TRUE
				SFLAFPTLR	TRUE
				SGCTPCSCDPQGAVR	TRUE
				STVPVNTNR	TRUE
				TEATQGLVLWSGK	TRUE
				TPSLDAEGSNCPATK	TRUE
				VLGAPVPAFEGR	TRUE
				VLPEGGAQCECPLGR	TRUE
				VVISGFGDPLICDNQVSTGDTR	TRUE
O00469	PLOD2	6	6	EFIAPVTLK	TRUE
				GGDGINSIGGGQK	TRUE
				ISGGYENVPTDDIHMK	TRUE
				IVGPEENLSQAEAR	TRUE
				SEDYVDIVQGNR	TRUE
				YIAVSFIDP	TRUE
O00471	EXOC5	6	6	IKEAADIIQK	TRUE
				LIQNVFEIK	TRUE
				LSDPSDLPR	TRUE
				NDIFEDAGILCQR	TRUE
				QVCSGEQLANLDK	TRUE
				SIGTGGIQDLK	TRUE
O00478	BTN3A3	1	1	GSSGGGVSCIIR	TRUE
O00479	HMGN4	2	2	DASTLQSQK	TRUE
				NRDASTLQSQK	TRUE
O00481	BTN3A1	2	1	GSSGEGVSCTIR	TRUE
				TASISIADPFFR	FALSE
O00483	NDUFA4	1	1	FYSVNVDYSK	TRUE
O00487	PSMD14	5	5	AVAVVVDPIQSVK	TRUE
				AVEEEDKMTPEQLAIK	TRUE
				LINANMMVLGHEPR	TRUE
				MTPEQLAIK	TRUE
				VIDVFAMPQSGTGVSVEAVDPVFQAK	TRUE
O00488	ZNF593	1	1	AAGMGSYVPPR	TRUE
O00499	BIN1	9	9	GPPVPPPPK	TRUE
				GVFPENFTER	TRUE
				GVFPENFTERVP	TRUE
				LDLPPGFMFK	TRUE
				LNQNLNDVLVGLEK	TRUE
				SPSPPDGSPAATPEIR	TRUE
				VGFYVNTFQSIAGLEENFHK	TRUE
				VNHEPEPAGGATPGATLPK	TRUE
				VQAQHDYTATDTDELQLK	TRUE
O00505	KPNA3	6	4	AENPSLENHR	TRUE
				DSQVVQVVLDGLK	TRUE
				IEVLQQHENEDIYK	TRUE
				LLSSDRNPPIDDLIK	FALSE
				NPPIDDLIK	FALSE
				SGILPILVK	TRUE
O00512	BCL9	2	2	IPVEGPLSPSR	TRUE
				STAPLNTQISALR	TRUE
O00515	LAD1	11	11	ATASEQPLAQEPPASGGSPATTK	TRUE
				ELAGQSRAEPASSR	TRUE
				GLPCTELFVAPVGVASK	TRUE
				LPPVTLQVK	TRUE
				NSLSPVQATQKPLVSK	TRUE
				QGASDPPTVASR	TRUE
				QVVEAAQAPIQER	TRUE
				RATASEQPLAQEPPASGGSPATTK	TRUE
				RQVVEAAQAPIQER	TRUE
				SLAPGMALGSGR	TRUE
				SPTADAKPAPK	TRUE
O00519	FAAH	5	5	DVESLALCLR	TRUE
				EEVYTSSQPLR	TRUE
				ELAPEAVLFTYVGK	TRUE
				GCVYGQEAVR	TRUE
				LDPTVPPLPFR	TRUE
O00522	KRIT1	1	1	EASLFIVPSVVK	TRUE
O00533	CHL1	3	3	VEEVKPLEGR	TRUE
				VIAVNEVGR	TRUE
				VMTPAVYAPYDVK	TRUE
O00534	VWA5A	12	12	AISQGHQAFLLEGDSSSR	TRUE
				ASGGTSEFITGK	TRUE
				DVFSCNVGNLQPGSK	TRUE
				DVPRPILLGASAPLK	TRUE
				FVLPAVLNPR	TRUE
				LISYAQLTGR	TRUE
				MLSPEQTVIFR	TRUE
				SGSMQSPMSSQDTSQLR	TRUE
				SSVDPAIFAF	TRUE
				VQSNCPLSPTEYLGEDK	TRUE
				YTQQTMEEALGR	TRUE
				YVQELPLEADGALR	TRUE
O00541	PES1	1	1	GSATNYITR	TRUE
O00560	SDCBP	5	5	ITSIVKDSSAAR	TRUE
				LYPELSQYMGLSLNEEEIR	TRUE
				SLMDHTIPEV	TRUE
				SLYPSLEDLK	TRUE
				SLYPSLEDLKVDK	TRUE
O00562	PITPNM1	6	6	ASTAFCPPAASSEAPDGPSSTAR	TRUE
				EGPGTPPTTLAR	TRUE
				ILDTIDIVR	TRUE
				LTFPVPPER	TRUE
				SSYGVAAPVDFLR	TRUE
				TNQAYSAFLR	TRUE
O00567	NOP56	7	7	GLTDLSACK	TRUE
				IDCFSEVPTSVFGEK	TRUE
				IINDNATYCR	TRUE
				LEELTMDGAK	TRUE
				LLLETHLPSK	TRUE
				LSFYETGEIPR	TRUE
				YPASTVQILGAEK	TRUE
O00571	DDX3X	14	3	DAYSSFGSR	FALSE
				DKDAYSSFGSR	FALSE
				DLLDLLVEAK	FALSE
				DLMACAQTGSGK	FALSE
				IVEQDTMPPK	FALSE
				LEQELFSGGNTGINFEK	FALSE
				MLDMGFEPQIR	FALSE
				QSSGASSSSFSSSR	TRUE
				SDYDGIGSR	TRUE
				SPILVATAVAAR	FALSE
				VGNLGLATSFFNER	TRUE
				VGSTSENITQK	FALSE
				YLVLDEADR	FALSE
				YTRPTPVQK	FALSE
O00584	RNASET2	4	4	ELDLNSVLLK	TRUE
				SWPFNLEEIK	TRUE
				VCEDGPVFYPPPK	TRUE
				VCEDGPVFYPPPKK	TRUE
O00592	PODXL	1	1	LASVPGSQTVVVK	TRUE
O00602	FCN1	3	3	MDGSVDFYR	TRUE
				VDLVDFEGNHQFAK	TRUE
				VVGLEGSDK	TRUE
O00622	CCN1	1	1	ELGFDASEVELTR	TRUE
O00625	PIR	2	2	MVEPQYQELK	TRUE
				TPTLYLDFK	TRUE
O00629	KPNA4	2	2	IEQLQNHENEDIYK	TRUE
				VQNTSLEAIVQNASSDNQGIQLSAVQAAR	TRUE
O00635	TRIM38	1	1	LLQNVNDTLSR	TRUE
O00712	NFIB	3	3	NPPGYLEDSFVK	TRUE
				SGVFNVSELVR	TRUE
				SLSSPPSSK	TRUE
O00743	PPP6C	2	2	TGGQVPDTNYIFMGDFVDR	TRUE
				YLPENDLKR	TRUE
O00746	NME4	1	1	AMIGHTDSAEAAPGTIR	TRUE
O00748	CES2	8	8	ADHGDELPFVFR	TRUE
				EEILAINKPFK	TRUE
				EMDREASQAALQK	TRUE
				FAPPEPPESWSGVR	TRUE
				FTEEEEQLSR	TRUE
				LGVLGFFSTGDK	TRUE
				MIPGVVDGVFLPR	TRUE
				SFFGGNYIK	TRUE
O00750	PIK3C2B	1	1	SLESVGISR	TRUE
O00754	MAN2B1	6	6	DGSLELMVHR	TRUE
				DLFSTFTITR	TRUE
				FLEDTFGNDGRPR	TRUE
				LPVSEGVFVVK	TRUE
				LQETTLVANQLR	TRUE
				TVDQYFYGIK	TRUE
O00762	UBE2C	3	3	ASQNRDPAATSVAAAR	TRUE
				DPAATSVAAAR	TRUE
				GISAFPESDNLFK	TRUE
O00764	PDXK	7	7	AQAGEGVRPSPMQLELR	TRUE
				DIEDPEIVVQATVL	TRUE
				LVYVCDPVLGDK	TRUE
				NPAGSVVMER	TRUE
				RNPAGSVVMER	TRUE
				VLSIQSHVIR	TRUE
				YDYVLTGYTR	TRUE
O14492	SH2B2	1	1	VLVAGPTTR	TRUE
O14495	PLPP3	2	2	EILSPVDIIDR	TRUE
				TTLSLPAPAIR	TRUE
O14497	ARID1A	12	12	AAAGQESEGPAVGPPQPLGK	TRUE
				AAGPGLGNVAMGPR	TRUE
				AAQVAPAAASSLGNPPPPPPSELK	TRUE
				AAQVAPAAASSLGNPPPPPPSELKK	TRUE
				AMGMTNLPAVGR	TRUE
				EIGGLTQVNK	TRUE
				GPSPSPVGSPASVAQSR	TRUE
				ITATMDDMLSTR	TRUE
				NDMTYNYANR	TRUE
				SAYPPPAPAYALSSPR	TRUE
				TPQPSSPMDQMGK	TRUE
				YPPQQQQQQQQR	TRUE
O14498	ISLR	3	3	ALPGTPVASSQPR	TRUE
				LPGLPEGAFR	TRUE
				MDSNELTFIPR	TRUE
O14526	FCHO1	2	2	APACSPEAAAAQLR	TRUE
				LPDVSEAGGSGR	TRUE
O14530	TXNDC9	2	2	LVEEHLDSEIQK	TRUE
				VLEHQLLQTTK	TRUE
O14531	DPYSL4	3	3	GAPAVVISQGR	TRUE
				MDENEFVAVTSTNAAK	TRUE
				QIGENLIVPGGIK	TRUE
O14545	TRAFD1	3	3	ALPSLNTGSSSPR	TRUE
				LDSQPQETSPELPR	TRUE
				VTPAAANYR	TRUE
O14548	COX7A2L	1	1	LTSDSTVYDYAGK	TRUE
O14556	GAPDHS	1	1	VPTPDVSVVDLTCR	TRUE
O14558	HSPB6	7	7	APSVALPVAQVPTDPGHFSVLLDVK	TRUE
				ASAPLPGLSAPGR	TRUE
				HFSPEEIAVK	TRUE
				LPPGVDPAAVTSALSPEGVLSIQAAPASAQAPPPAAAK	TRUE
				MEIPVPVQPSWLR	TRUE
				RASAPLPGLSAPGR	TRUE
				VVGEHVEVHAR	TRUE
O14561	NDUFAB1	4	4	LMCPQEIVDYIADK	TRUE
				LMCPQEIVDYIADKK	TRUE
				LSVNSHFMK	TRUE
				LYDKIDPEK	TRUE
O14562	UBFD1	3	3	FPLDSTGSELK	TRUE
				LEQDQLWIGTK	TRUE
				LPTVPLSGMYNK	TRUE
O14569	CYB561D2	1	1	ALSAETESHIYR	TRUE
O14578	CIT	2	2	LTQGLQEALDR	TRUE
				LVDFGSAAKMNSNK	TRUE
O14579	COPE	6	6	APPAPGPASGGSGEVDELFDVK	TRUE
				DSIVAELDREMSR	TRUE
				FGVVLDEIKPSSAPELQAVR	TRUE
				LVLQYAPSA	TRUE
				MFADYLAHESR	TRUE
				NAFYIGSYQQCINEAQR	TRUE
O14602	EIF1AY	1	1	LEALCFDGVK	TRUE
O14613	CDC42EP2	1	1	ELPDGPSPLLK	TRUE
O14617	AP3D1	9	9	ALDIDLDKPLADSEK	TRUE
				ASCILQLVK	TRUE
				EQAGEAEGAQAVTQLMVDR	TRUE
				GMELSVLDSLNAR	TRUE
				ILIEDSDQNLK	TRUE
				LLESGDLSMSSIK	TRUE
				LYASILQQK	TRUE
				SPEKDVPMVEK	TRUE
				VDSCASMYSR	TRUE
O14618	CCS	2	2	KESAQPPAHL	TRUE
				SAGLFQNPK	TRUE
O14638	ENPP3	3	3	TYLPTFETTI	TRUE
				VPFYEPSHAEEVSK	TRUE
				VQPVSEILQLK	TRUE
O14639	ABLIM1	7	7	FPAAQAPDPSETPK	TRUE
				GVSMPNMLEPK	TRUE
				QLQEEQLMK	TRUE
				STSQGSINSPVYSR	TRUE
				TASLPGYGR	TRUE
				TLSPTPSAEGYQDVR	TRUE
				VLTGEYISK	TRUE
O14640;P54792	DVL1;DVL1P1	1	0	AYTVVGGPPGGPPVR	FALSE
O14641	DVL2	4	3	AMAAPESGLEVR	TRUE
				DLGSVPPELTASR	TRUE
				FSSSTEQSSASR	FALSE
				GSTGGAPNLR	TRUE
O14646	CHD1	2	2	ISGVQVNAK	TRUE
				SSPSILAVQR	TRUE
O14647	CHD2	1	1	TILENNSGR	TRUE
O14653	GOSR2	2	2	MDPLFQQTHK	TRUE
				YDVQHLQTALR	TRUE
O14656	TOR1A	1	1	VAEEMTFFPK	TRUE
O14657	TOR1B	1	1	VAEEMTFFPR	TRUE
O14662	STX16	1	1	LTDAFLLLR	TRUE
O14672	ADAM10	5	5	AIDTIYQTTDFSGIR	TRUE
				AVSHEDQFLR	TRUE
				GGTFYVEPAER	TRUE
				LVDADGPLAR	TRUE
				TITLQPGSPCNDFR	TRUE
O14678	ABCD4	1	1	VNAEPAAFYR	TRUE
O14683	TP53I11	1	1	ISQVLGNEIK	TRUE
O14684	PTGES	1	1	AFANPEDALR	TRUE
O14686	KMT2D	8	8	AIFSGISQR	TRUE
				APVAPTPPTLIK	TRUE
				ASEPLLSPPPFGESR	TRUE
				GQTPFAGTQDK	TRUE
				IIEPVAAMR	TRUE
				LSPLPVVSR	TRUE
				SLPSDPFSR	TRUE
				SVAEQHTPVCSR	TRUE
O14713	ITGB1BP1	1	1	SVDSSLGGLSR	TRUE
O14727	APAF1	4	4	DSVSGITSYVR	TRUE
				LPLNIEEAK	TRUE
				SVLAAEAVR	TRUE
				YVVPVESSLGK	TRUE
O14732	IMPA2	2	2	ALVLTEIGPK	TRUE
				FIAEEAAASGAK	TRUE
O14735	CDIPT	2	2	MIDLSGNPVLR	TRUE
				NMAALDAADR	TRUE
O14737	PDCD5	6	6	ADEELEALRR	TRUE
				AVENYLIQMAR	TRUE
				LSNLALVKPEK	TRUE
				NSILAQVLDQSAR	TRUE
				VSEQGLIEILK	TRUE
				VSQQTEKTTTVK	TRUE
O14744	PRMT5	6	6	AAMAVGGAGGSR	TRUE
				DLNCVPEIADTLGAVAK	TRUE
				DWNTLIVGK	TRUE
				GPLVNASLR	TRUE
				VPLVAPEDLR	TRUE
				YSQYQQAIYK	TRUE
O14745	NHERF1	8	8	AQEAPGQAEPPAAAEVQGAGNENEPR	TRUE
				EALAEAALESPRPALVR	TRUE
				ETHQQVVSR	TRUE
				LLVVDPETDEQLQK	TRUE
				LVEPGSPAEK	TRUE
				QHGDVVSAIR	TRUE
				SADAAAGAPLPR	TRUE
				SVDPDSPAEASGLR	TRUE
O14757	CHEK1	2	2	ILVENPSAR	TRUE
				VTSGGVSESPSGFSK	TRUE
O14772	FPGT	1	1	LPNASALGK	TRUE
O14773	TPP1	6	6	AYPDVAALSDGYWVVSNR	TRUE
				ILSGRPPLGFLNPR	TRUE
				LFGGNFAHQASVAR	TRUE
				LSELVQAVSDPSSPQYGK	TRUE
				LYQQHGAGLFDVTR	TRUE
				VPIPWVSGTSASTPVFGGILSLINEHR	TRUE
O14775	GNB5	1	1	ESIIFGASSVDFSLSGR	TRUE
O14776	TCERG1	9	8	ATFSEFAAK	TRUE
				EALFNEFVAAAR	TRUE
				GPPPPPTASEPTR	TRUE
				GVSAFSTWEK	FALSE
				LFNEHIEALTK	TRUE
				LIVAYVDDLDR	TRUE
				TLESTWEKPQELK	TRUE
				VFFYNPTTR	TRUE
				YLVLDCVPEER	TRUE
O14787	TNPO2	3	1	ALVMLLEVR	FALSE
				QECLNNIGDASSLIR	TRUE
				QSSFALLGDLTK	FALSE
O14791	APOL1	3	3	LNILNNNYK	TRUE
				VNEPSILEMSR	TRUE
				VTEPISAESGEQVER	TRUE
O14795	UNC13B	2	1	AISPTSSSR	TRUE
				VQELQSPPR	FALSE
O14798	TNFRSF10C	1	1	QEEVPQQTVAPQQQR	TRUE
O14802	POLR3A	7	7	AEALVLMGTK	TRUE
				LAPVYLSNR	TRUE
				LEVNAETVR	TRUE
				LLVEGDNLR	TRUE
				TAETGYMQR	TRUE
				TVISPDPNLR	TRUE
				VVVQGIPEVSR	TRUE
O14807	MRAS	1	1	ATSAVPSDNLPTYK	TRUE
O14815	CAPN9	1	1	NPEFILGGATR	TRUE
O14818	PSMA7	7	5	ALLEVVQSGGK	FALSE
				DIVVLGVEK	TRUE
				DIVVLGVEKK	TRUE
				GRDIVVLGVEK	TRUE
				ILNPEEIEK	TRUE
				KGSTAVGVR	TRUE
				LTVEDPVTVEYITR	FALSE
O14828	SCAMP3	4	4	AQQEFAAGVFSNPAVR	TRUE
				ELQHAALGGTATR	TRUE
				QYATLDVYNPFETR	TRUE
				TAAANAAAGAAENAFR	TRUE
O14832	PHYH	1	1	NLVPDADIQR	TRUE
O14841	OPLAH	14	14	AGDFGAAFVER	TRUE
				DIPLNQGCLAPVR	TRUE
				DLLHIGTQAR	TRUE
				DQPLDSSHIASIR	TRUE
				EEALLSVLTER	TRUE
				FMSIAEQMGR	TRUE
				GGPVTVTDANLVLGR	TRUE
				GLPLEVSSEDHMDDGSPIR	TRUE
				GSILDPSPEAAVVGGNVLTSQR	TRUE
				ILEQEAGMLLPR	TRUE
				ITDPEILESR	TRUE
				LLSEDPANYADAPTEGIR	TRUE
				MGTTVATNALLER	TRUE
				TGDLLEVQQPVDLGALR	TRUE
O14867	BACH1	2	2	ISESPEPGQR	TRUE
				TFGESQDLPLK	TRUE
O14874	BCKDK	1	1	YLQQELPVR	TRUE
O14879	IFIT3	5	5	LSDAQIYVDK	TRUE
				QAIELSPDNQYVK	TRUE
				SEDTAVQHGLEGLSISK	TRUE
				SPCQTDVLR	TRUE
				VCNQIEFLNTEFK	TRUE
O14893	GEMIN2	1	1	SQQLDSNVTMPK	TRUE
O14896	IRF6	2	2	EFNLMYDGTK	TRUE
				LQISTPDIK	TRUE
O14907	TAX1BP3	2	2	SYIPGQPVTAVVQR	TRUE
				VSEGGPAEIAGLQIGDK	TRUE
O14908	GIPC1	2	2	DTELAATMVELGK	TRUE
				GPATVEDLPSAFEEK	TRUE
O14920	IKBKB	4	4	ALDDILNLK	TRUE
				DLKPENIVLQQGEQR	TRUE
				GPVSGSPDSMNASR	TRUE
				LGTGGFGNVIR	TRUE
O14924	RGS12	1	1	LLQDPVGVR	TRUE
O14929	HAT1	2	2	LLVTDMSDAEQYR	TRUE
				YYTEFPTVLDITAEDPSK	TRUE
O14936	CASK	7	7	ETGQQFAVK	TRUE
				FTSSPGLSTEDLK	TRUE
				FTSSPGLSTEDLKR	TRUE
				MLMLDPAER	TRUE
				NTDEPMGITLK	TRUE
				QGTLHVGDEIR	TRUE
				VGDIIQIISK	TRUE
O14950;P19105	MYL12B;MYL12A	9	0	ATSNVFAMFDQSQIQEFK	FALSE
				DGFIDKEDLHDMLASLGK	FALSE
				EAFNMIDQNR	FALSE
				EDLHDMLASLGK	FALSE
				ELLTTMGDR	FALSE
				ELLTTMGDRFTDEEVDELYR	FALSE
				FTDEEVDELYR	FALSE
				GNFNYIEFTR	FALSE
				LNGTDPEDVIR	FALSE
O14964	HGS	6	6	ACGQIFCGK	TRUE
				ALQNAVTTFVNR	TRUE
				LYYEGLQDK	TRUE
				VCEPCYEQLNR	TRUE
				VEGHVFPEFK	TRUE
				VVQDTYQIMK	TRUE
O14974	PPP1R12A	12	12	AQLHDTNMELTDLK	TRUE
				ETQTDSISR	TRUE
				ILVDNLCDMEMVNK	TRUE
				ITTGSSSAGTQSSTSNR	TRUE
				LAYVAPTIPR	TRUE
				LSSSLDNKEK	TRUE
				LYEQILAENEK	TRUE
				SGGTALHVAAAK	TRUE
				SLLSSTSTTTK	TRUE
				STQGVTLTDLQEAEK	TRUE
				TGSYGALAEITASK	TRUE
				WIGSETDLEPPVVK	TRUE
O14975	SLC27A2	1	1	MTLVEEGFNPAVIK	TRUE
O14976	GAK	10	10	AIIQEVCFMK	TRUE
				AMLQVNPEER	TRUE
				AVLAVHPDK	TRUE
				AVVMTPVPLFSK	TRUE
				DQSDFVGQTVELGELR	TRUE
				GDLDISYITSR	TRUE
				GPLSCDTVLK	TRUE
				IAVMSFPAEGVESALK	TRUE
				VENLLLSNQGTIK	TRUE
				VIQSVANYAK	TRUE
O14979	HNRNPDL	5	5	GFCFITYTDEEPVK	TRUE
				HVTAQQPSR	TRUE
				QLAPLLPSLAPSSAR	TRUE
				SAAAAAATR	TRUE
				VFVGGLSPDTSEEQIK	TRUE
O14980	XPO1	11	11	DLLGLCEQK	TRUE
				DTDSINLYK	TRUE
				EPEVLSTMAIIVNK	TRUE
				ESPFSTSASPLLSGSQHFDVPPR	TRUE
				IYLDMLNVYK	TRUE
				MAQEVLTHLK	TRUE
				NVDILKDPETVK	TRUE
				QMLPLNTNIR	TRUE
				SAFPHLQDAQVK	TRUE
				TSESLCQNNMVILK	TRUE
				VDTILEFSQNMNTK	TRUE
O14981	BTAF1	6	6	AAAQQLGEVVK	TRUE
				ETCAQTLGVVLK	TRUE
				FGDFVSDEVVAPVR	TRUE
				IAAGQAVEAIVK	TRUE
				IANVVINQSANDSK	TRUE
				QDVINTLLPK	TRUE
O14994	SYN3	1	1	SPGSPQLSR	TRUE
O15014	ZNF609	2	2	EVGIPAPNAVATLPDNIK	TRUE
				FVTPVPGPQGK	TRUE
O15020	SPTBN2	6	6	DLNAAEALQR	TRUE
				DQADPQCLFLR	TRUE
				DVSSADLVIK	TRUE
				GPAPSAMPQSR	TRUE
				GQVLAAAYELQR	TRUE
				IVNTQEQLNHR	TRUE
O15021	MAST4	2	2	SLQPPGIESEK	TRUE
				SPSATGQSSFR	TRUE
O15027	SEC16A	14	14	ADSGPTQPPLSLSPAPETK	TRUE
				AQQELVPPQQQASPPQLPK	TRUE
				DSSQGPCEPLPGPLTQPR	TRUE
				FATNEAIQR	TRUE
				FGPGGQLIK	TRUE
				GGIGASENLENPPK	TRUE
				LLPSAPQTLPDGPLASPAR	TRUE
				NPSSAAPVQSR	TRUE
				QALQSTPLGSSSK	TRUE
				QSGPGAPNLDR	TRUE
				TMATMGDTLASR	TRUE
				TVPDSEAPPGWDR	TRUE
				YGPLPGPAVPR	TRUE
				YVDVLNPSGTQR	TRUE
O15031	PLXNB2	13	13	AITEIYLTR	TRUE
				AMTLQEAEAFVGAER	TRUE
				EAFEAYTDHATYK	TRUE
				FGAQLQCVTGPQATR	TRUE
				IQPETGPLGGGIR	TRUE
				LQLEQQVATGPALDNK	TRUE
				LQQIAAALENK	TRUE
				LVECGSLFK	TRUE
				SINVTGQGFSLIQR	TRUE
				SQLEGLEESVR	TRUE
				SSGGPGAGLCLFPLDK	TRUE
				TLTETDLYCEPPEVQPPPK	TRUE
				VLNCDTISQVK	TRUE
O15037	KHNYN	2	2	FAVSAEAENK	TRUE
				GGNLVTGTQR	TRUE
O15040	TECPR2	3	3	ASISEPVTFR	TRUE
				LESPNSGSCSLPER	TRUE
				LPGATVSETR	TRUE
O15042	U2SURP	2	2	LYSILQGDSPTK	TRUE
				TIQGHLQSENFK	TRUE
O15047	SETD1A	4	3	EVPVPTPAPVEVPVPER	TRUE
				LIVDPALDPALR	TRUE
				TLPTAGTVGR	TRUE
				VDHDTIIDATK	FALSE
O15050	TRANK1	1	1	LAEAADLLNR	TRUE
O15056	SYNJ2	5	5	GGASEEALSAVAPR	TRUE
				GLEANAPAFDR	TRUE
				RDPIDPVSAGASAAK	TRUE
				TALQVFDPLAK	TRUE
				TTNAQEAEAAIR	TRUE
O15061	SYNM	34	34	AALEALLGR	TRUE
				AELQELNAR	TRUE
				ATGPAAPPPR	TRUE
				AVSSQTNVR	TRUE
				DYQDLLQVK	TRUE
				EALGLEQLR	TRUE
				EGLWAEGQAR	TRUE
				EGQGGPGSVSVDVK	TRUE
				EGQGGPGSVSVDVKK	TRUE
				EIIFQGPISAAGK	TRUE
				ELQEALGAR	TRUE
				ELYIPSGESEVAGGASHSSGQR	TRUE
				ENLLLEEELR	TRUE
				EREVPISLEVSQDR	TRUE
				ETVQLYEDEVR	TRUE
				EVPISLEVSQDR	TRUE
				EVPVYIGEDSTIAR	TRUE
				GLQTPVKDAGGGTGR	TRUE
				GRLDAELGAQQR	TRUE
				GSQTGTSIGGDAR	TRUE
				LCAQEAEALR	TRUE
				LCAQEAEALRR	TRUE
				LDAELGAQQR	TRUE
				LGPTETETSEHIAIR	TRUE
				MREELSALTR	TRUE
				NDQAVGVSFK	TRUE
				QFTQSPETEASADSFPDTK	TRUE
				SGEFHAEPTVIEK	TRUE
				SPAPGSPDEEGGAEAPAAGIR	TRUE
				TFSPTYGLLR	TRUE
				TFVLAGSADSPELGK	TRUE
				TQEAGALGVSDR	TRUE
				VGDYFATEESVGTQTSVR	TRUE
				YSWQDEIVQGTR	TRUE
O15066	KIF3B	4	2	DYEGPAIAPK	TRUE
				LLQDSLGGNAK	FALSE
				SQNQQYLVR	FALSE
				VNEDPKDALLR	TRUE
O15067	PFAS	9	9	AFSITQGLLK	TRUE
				ATGLGPVDR	TRUE
				ELSDPAGAIIYTSR	TRUE
				FCDNSSAIQGK	TRUE
				FGEPVLAGFAR	TRUE
				IVLVDDRECPVR	TRUE
				NPSTVEAFDLAQSNSEHSR	TRUE
				SLGLQLPDGQR	TRUE
				VGPGPALMLR	TRUE
O15075	DCLK1	7	7	AVSSLATAK	TRUE
				GGDLFDAITSTNK	TRUE
				GIVYAISPDR	TRUE
				SPSPSPTSPGSLR	TRUE
				TIYTIDGLK	TRUE
				TLQTLSSEK	TRUE
				TLSDNVNLPQGVR	TRUE
O15084	ANKRD28	2	2	TPLDLAAFK	TRUE
				TVSFEALPIMR	TRUE
O15085	ARHGEF11	6	6	ASNPLAAEFK	TRUE
				DLIISEMQR	TRUE
				DVVAGLTQR	TRUE
				LSSLSSLGDSAPER	TRUE
				QPSDASETTGLVQR	TRUE
				SLENPTPPFTPK	TRUE
O15111	CHUK	3	3	GGPVDLTLK	TRUE
				IACTQSSAR	TRUE
				TVYEGPFASR	TRUE
O15117	FYB1	5	5	FGTPASLTTR	TRUE
				GSPAPLGVR	TRUE
				INQEELASGTPPAR	TRUE
				QGEQIEIIR	TRUE
				VTGPNSSSGIQAR	TRUE
O15119	TBX3	1	1	EAATSELQSIQR	TRUE
O15120	AGPAT2	1	1	VWIYPEGTR	TRUE
O15126	SCAMP1	5	5	AQQEFATGVMSNK	TRUE
				DPSVTQVTR	TRUE
				EHALAQAELLK	TRUE
				EMQNLSQHGR	TRUE
				NVPPGLDEYNPFSDSR	TRUE
O15127	SCAMP2	3	3	AASSAAQGAFQGN	TRUE
				ELQNTVANLHVR	TRUE
				TGASFQQAQEEFSQGIFSSR	TRUE
O15143	ARPC1B	5	5	ASSEGGTAAGAGLDSLHK	TRUE
				EVEERPAPTPWGSK	TRUE
				LDVPKQSSQR	TRUE
				NSVSQISVLSGGK	TRUE
				TWKPTLVILR	TRUE
O15144	ARPC2	8	8	DNTINLIHTFR	TRUE
				DSIVHQAGMLK	TRUE
				ELQAHGADELLK	TRUE
				IIEETLALK	TRUE
				MILLEVNNR	TRUE
				NCFASVFEK	TRUE
				VTVVFSTVFKDDDDVVIGK	TRUE
				YFQFQEEGK	TRUE
O15145	ARPC3	3	3	LIGNMALLPIR	TRUE
				QFMNKSLSGPGQ	TRUE
				VFDPQNDKPSK	TRUE
O15160	POLR1C	4	4	FSPVATASYR	TRUE
				ILLAEVPTMAVEK	TRUE
				LGLIPIHADPR	TRUE
				VVLGEFGVR	TRUE
O15162	PLSCR1	2	2	SLDEQCVVGK	TRUE
				VYFAAEDTDCCTR	TRUE
O15164	TRIM24	3	3	FTGNQIQNR	TRUE
				SPSASSVGSR	TRUE
				VIIDTLITK	TRUE
O15173	PGRMC2	3	3	FYGPAGPYGIFAGR	TRUE
				GLGAGAGAGEESPATSLPR	TRUE
				RGLGAGAGAGEESPATSLPR	TRUE
O15194	CTDSPL	1	1	MDGPAIITQVTNPK	TRUE
O15195	VILL	6	6	AGAVALQALK	TRUE
				LFQVQGTDSHNTR	TRUE
				LPEEVPSFQPR	TRUE
				LQDELGGQTVLHR	TRUE
				QAGAEAQGAAEAFQQR	TRUE
				SPATPIVLVK	TRUE
O15204	ADAMDEC1	1	1	VVPSASTTFDNFLR	TRUE
O15211	RGL2	3	3	AGTLEALVR	TRUE
				GVGGGSADLIR	TRUE
				VSCEVEPPGSSDPPAPR	TRUE
O15212	PFDN6	3	3	EELALLDGSNVVFK	TRUE
				ETLAQLQQEFQR	TRUE
				LDYITAEIK	TRUE
O15213	WDR46	1	1	METAPKPGK	TRUE
O15226	NKRF	2	2	GAVEDVISR	TRUE
				SESHTDLTFSR	TRUE
O15230	LAMA5	32	32	AGALLPAIHEQLR	TRUE
				AHPASNAIDGTER	TRUE
				AIEASNAYSR	TRUE
				ASPDGLCQVSLQQGR	TRUE
				CDIGGALGQSCEPR	TRUE
				DLADLAAYTALK	TRUE
				DLGAPQAAAEAELAAAQR	TRUE
				DQASQLLAGTEATLGHAK	TRUE
				EQVLPAGQIVNCDCSAAGTQGNACR	TRUE
				GALDQLCGAGGLCR	TRUE
				GDSCQECAPGFYR	TRUE
				GPPPELQPQPEGPPR	TRUE
				GQLQLVEGNFR	TRUE
				GQYCDICTAANSNK	TRUE
				GSPRPTEDLYCK	TRUE
				GYAQMAPVQPR	TRUE
				IAASATCGEEAPAR	TRUE
				ILLVTDGAR	TRUE
				LAASLDGAR	TRUE
				LAQHEAGLMDLR	TRUE
				LCDELTGQCICPPR	TRUE
				LELEEAATPEGHAVR	TRUE
				LFPTGGSVR	TRUE
				LGGQAVGTR	TRUE
				LVGGPVAGGDPNQTIR	TRUE
				MQTFSPAGSK	TRUE
				QATGDYMGVSLR	TRUE
				QEVGVAVHTPQR	TRUE
				SVEVHGAVGASGCPAA	TRUE
				VGFEGATCDR	TRUE
				VQSQLQAMQENVER	TRUE
				VSSYGGTLR	TRUE
O15231	ZNF185	6	6	GGQGDPAVPAQQPADPSTPER	TRUE
				GSSSATSVSAVPADR	TRUE
				LVAPDVEGMR	TRUE
				QSSPSGSEQLVR	TRUE
				SEAASGVLR	TRUE
				SQDPPALAR	TRUE
O15235	MRPS12	1	1	GVVLCTFTR	TRUE
O15240	VGF	8	8	AAPAPTHVR	TRUE
				AYQGVAAPFPK	TRUE
				FGEGVSSPK	TRUE
				LLQQGLAQVEAGR	TRUE
				MPDSGPLPETHK	TRUE
				NAPPEPVPPPR	TRUE
				TLQPPSALR	TRUE
				VNLESPGPER	TRUE
O15247	CLIC2	2	2	FNVTTVDMTR	TRUE
				IEEFLEQTLAPPR	TRUE
O15254	ACOX3	2	2	ASTVEGGDTALLPEFPR	TRUE
				SPGADLSLEK	TRUE
O15258	RER1	2	2	SEGDSVGESVHGKPSVVYR	TRUE
				VDPSLMEDSDDGPSLPTK	TRUE
O15260	SURF4	1	1	SMFAGVPTMR	TRUE
O15264	MAPK13	6	5	ASPQAADLLEK	TRUE
				DLKPGNLAVNEDCELK	FALSE
				EIVNFSPIAR	TRUE
				IMGMEFSEEK	TRUE
				MLELDVDKR	TRUE
				SYIQSLPQTPR	TRUE
O15269	SPTLC1	3	3	ALQGISGLK	TRUE
				LLQEIVDQCMNR	TRUE
				YGVGTCGPR	TRUE
O15270	SPTLC2	1	1	ECVQQLAENTR	TRUE
O15294	OGT	7	7	ASSVGNVADSTEPTK	TRUE
				ASSVGNVADSTEPTKR	TRUE
				DSGNIPEAIASYR	TRUE
				GSVAEAEDCYNTALR	TRUE
				IIFSPVAPK	TRUE
				ISSPLFNTK	TRUE
				LVSIVADQLEK	TRUE
O15305	PMM2	7	7	AAPGPALCLFDVDGTLTAPR	TRUE
				IEFYELDKK	TRUE
				IGVVGGSDFEK	TRUE
				NGMLNVSPIGR	TRUE
				TMGYSVTAPEDTR	TRUE
				TMGYSVTAPEDTRR	TRUE
				TMPGGNDHEIFTDPR	TRUE
O15321	TM9SF1	1	1	MAESLYEIR	TRUE
O15327	INPP4B	3	3	MFESLPLQIK	TRUE
				SNDVLPVITGR	TRUE
				YSSTEIVEGTR	TRUE
O15344	MID1	5	5	AFDANTMTSAEK	TRUE
				ASVSGPNSPSETR	TRUE
				EIPIEPAPHLR	TRUE
				LIEPIPDSHIR	TRUE
				NTELETLLAK	TRUE
O15347	HMGB3	2	2	NPEVPVNFAEFSK	TRUE
				STNPGISIGDVAK	TRUE
O15355	PPM1G	7	7	ALEDAFLAIDAK	TRUE
				AYTGFSSNSER	TRUE
				EEPGSDSGTTAVVALIR	TRUE
				GTEAGQVGEPGIPTGEAGPSCSSASDK	TRUE
				NLPPEEQMISALPDIK	TRUE
				NTAELQPESGKR	TRUE
				QLIVANAGDSR	TRUE
O15357	INPPL1	11	10	AAAEELLAR	TRUE
				ALQDMSSTAPPAPQPSTR	TRUE
				LDVTLGDLTK	TRUE
				LLLDTLQLSK	TRUE
				SALLPGPLELQPPR	TRUE
				SCSVLQMAK	TRUE
				TGIANTLGNK	FALSE
				TIPVQAFEVK	TRUE
				TLSEVDYAPAGPAR	TRUE
				VFDQQSSPMVTR	TRUE
				VLSGLEILSK	TRUE
O15371	EIF3D	7	7	DMPYQPFSK	TRUE
				DNSDFDLLTVSETANEPPQDEGNSFNSPR	TRUE
				GAVIATELK	TRUE
				IFHTVTTTDDPVIR	TRUE
				LGDDIDLIVR	TRUE
				VADWTGATYQDK	TRUE
				YLILKDPNK	TRUE
O15372	EIF3H	7	7	DFSPEALKK	TRUE
				EFTAQNLGK	TRUE
				GEPPLPEEDLSK	TRUE
				KEGTGSTATSSSSTAGAAGK	TRUE
				LFKPPQPPAR	TRUE
				LFMAQALQEYNN	TRUE
				TAQGSLSLK	TRUE
O15379	HDAC3	1	1	VSPTNMQGFTK	TRUE
O15382	BCAT2	2	2	AAAALGQIWAR	TRUE
				EVFGSGTACQVCPVHR	TRUE
O15389;Q08ET2	SIGLEC5;SIGLEC14	1	0	MEDTGSYFFR	FALSE
O15393	TMPRSS2	2	2	TSEVLNAAK	TRUE
				VLTQASNPVVCTQPK	TRUE
O15394	NCAM2	2	2	EVVSPQEFK	TRUE
				IIELSQTTAK	TRUE
O15397	IPO8	6	6	DNIVEGIIR	TRUE
				IAAENELNQSYK	TRUE
				IEQQGGFTFENK	TRUE
				IINFAPSLLR	TRUE
				TALQEVYTLAEHR	TRUE
				YGSPGNVTK	TRUE
O15400	STX7	9	9	ASSRVSGSFPEDSSK	TRUE
				EFGSLPTTPSEQR	TRUE
				ITQCSVEIQR	TRUE
				QLEADIMDINEIFK	TRUE
				QQYTNQLAK	TRUE
				SYTPGVGGDPAQLAQR	TRUE
				TLNQLGTPQDSPELR	TRUE
				VSGSFPEDSSK	TRUE
				VSGSFPEDSSKER	TRUE
O15417	TNRC18	3	3	GPAGPAAQQAAK	TRUE
				GVVDLTQEAR	TRUE
				LGPGLVDQER	TRUE
O15438	ABCC3	4	4	GVVAEFDSPANLIAAR	TRUE
				MDALCGSGELGSK	TRUE
				QLSALSSDGEGQGRPVPR	TRUE
				SPQSFFDTTPSGR	TRUE
O15439	ABCC4	2	2	LNTIIDSDK	TRUE
				VIEYTDLEK	TRUE
O15440	ABCC5	2	2	GANLSGGQR	TRUE
				TLSLEAPAR	TRUE
O15446	POLR1G	1	1	SALAPNLLTSGK	TRUE
O15455	TLR3	1	1	NVDSSPSPFQPLR	TRUE
O15460	P4HA2	5	5	GQEFLRPCGSTEVD	TRUE
				LLSLDPSHER	TRUE
				MQHITGLTVK	TRUE
				QFFPTDEDEIGAAK	TRUE
				TGVLTVASYR	TRUE
O15484	CAPN5	3	3	DSPTGANSYVIIK	TRUE
				GTSTPEYNVK	TRUE
				VFTDVPSNCR	TRUE
O15488	GYG2	1	1	VESVSSEETFEPSQELPAEALR	TRUE
O15498	YKT6	3	3	GEKLDDLVSK	TRUE
				NDSLAGVVIADNEYPSR	TRUE
				VQAELDETK	TRUE
O15504	NUP42	1	1	YSNVIQPSSFSK	TRUE
O15511	ARPC5	4	4	ALAAGGVGSIVR	TRUE
				NPPINTKSQAVK	TRUE
				QGNMTAALQAALK	TRUE
				SKNTVSSAR	TRUE
O15514	POLR2D	2	2	AGDVEEDASQLIFPK	TRUE
				ALIPSLEGR	TRUE
O15516	CLOCK	1	1	IPTDTSTPPR	TRUE
O15523	DDX3Y	2	2	NDPELDQQLANLDLNSEK	TRUE
				QSSGSSSSGFGASR	TRUE
O15530;Q6A1A2	PDPK1;PDPK2P	3	0	IGSFDETCTR	FALSE
				LGCEEMEGYGPLK	FALSE
				TQTESSTPPGIPGGSR	FALSE
O15533	TAPBP	4	4	FVPLPASAK	TRUE
				GAPAPHCEMSR	TRUE
				VSLMPATLAR	TRUE
				WASGLTPAQNCPR	TRUE
O15541	RNF113A	2	2	DTSMGNASSGMVR	TRUE
				VTHNPMIQK	TRUE
O15551	CLDN3	3	2	DFYNPVVPEAQK	TRUE
				STGPGASLGTGYDR	TRUE
				VYDSLLALPQDLQAAR	FALSE
O15552	FFAR2	1	1	NQGSSLLGR	TRUE
O15554	KCNN4	2	2	QLPEPSQQSK	TRUE
				SIGALNQVR	TRUE
O43143	DHX15	13	12	ASTNAMLISAGLPPLK	TRUE
				EAMNDPLLER	TRUE
				IFEPPPPKK	TRUE
				IIPLYSTLPPQQQQR	TRUE
				LDLGEDYPSGK	TRUE
				RVAAMSVAQR	TRUE
				SLMSADNVR	TRUE
				SNLGSVVLQLK	TRUE
				TEMQDNTYPEILR	TRUE
				TLATDILMGVLK	TRUE
				VAAMSVAQR	TRUE
				VESLLVTAISK	TRUE
				YMTDGMLLR	FALSE
O43148	RNMT	4	4	DITVLDLGCGK	TRUE
				LVCTDIADVSVK	TRUE
				MQALEPYPANESSK	TRUE
				SVLIGEFLEK	TRUE
O43149	ZZEF1	7	7	ATFLQTDLLK	TRUE
				EAAAALLPTPPCESLVSR	TRUE
				FLPTGISSK	TRUE
				GEESVTLEQFR	TRUE
				LLPAEVDAAVIK	TRUE
				LPSSSGLPAADVSPATAEEPLSPSTPTR	TRUE
				VNEATAVLYAR	TRUE
O43150	ASAP2	2	2	APTASSFTTR	TRUE
				VTSTNPLTPTPPPPVAK	TRUE
O43155	FLRT2	1	1	LDISNNQLR	TRUE
O43156	TTI1	2	2	LAGSLVTQAPISAR	TRUE
				TQTVENVEHLQTR	TRUE
O43157	PLXNB1	3	3	GQNLDVVQTPR	TRUE
				GVGGGIPPITTR	TRUE
				LQQIAAAVENK	TRUE
O43166	SIPA1L1	7	6	ASVVGTDGTPK	TRUE
				DVPSFGPPIPK	TRUE
				GSVLEDAIPSTAK	TRUE
				LIDLESPTPESQK	TRUE
				LSDFLITGGGK	TRUE
				SQAGSTPLTR	TRUE
				VINAENAAHK	FALSE
O43169	CYB5B	2	2	GQEVETSVTYYR	TRUE
				SGSMATAEASGSDGKGQEVETSVTYYR	TRUE
O43172	PRPF4	8	8	ALGEPITLFGEGPAER	TRUE
				APDDLVAPVVK	TRUE
				DVNLASCAADGSVK	TRUE
				FLGTTCYDR	TRUE
				NILSVVGTDALK	TRUE
				QAEVLAEFER	TRUE
				TKAPDDLVAPVVK	TRUE
				TSQMQELHK	TRUE
O43175	PHGDH	9	9	AGTGVDNVDLEAATR	TRUE
				GGIVDEGALLR	TRUE
				GTIQVITQGTSLK	TRUE
				ILQDGGLQVVEK	TRUE
				QADVNLVNAK	TRUE
				QIPQATASMK	TRUE
				TLGILGLGR	TRUE
				VLISDSLDPCCR	TRUE
				VTADVINAAEK	TRUE
O43181	NDUFS4	2	2	LDITTLTGVPEEHIK	TRUE
				NNMQSGVNNTK	TRUE
O43182	ARHGAP6	3	3	LSSANSLPAGEQDSPR	TRUE
				SLLAMQEDAAPGGSEK	TRUE
				SVPIQSLSELER	TRUE
O43237	DYNC1LI2	6	6	DAVFIPAGWDNEK	TRUE
				GGPASVPSSSPGTSVK	TRUE
				KTGSPGSPGAGGVQSTAK	TRUE
				NILVFGEDGSGK	TRUE
				TGSPGSPGAGGVQSTAK	TRUE
				TVLSNVQEELDR	TRUE
O43240	KLK10	1	1	VGDDHLLLLQGEQLR	TRUE
O43242	PSMD3	10	10	AIQLEYSEAR	TRUE
				AVQGFFTSNNATR	TRUE
				ELDTVTLEDIK	TRUE
				EMIDIYSTR	TRUE
				EPQLAFHQR	TRUE
				EQQDLEFAK	TRUE
				FNQVLDQFGEK	TRUE
				ISLADIAQK	TRUE
				LQLDSPEDAEFIVAK	TRUE
				SVFPEQANNNEWAR	TRUE
O43252	PAPSS1	5	5	DIVPVDASYEVK	TRUE
				EGQKPPEGFMAPK	TRUE
				MEIPGSLCK	TRUE
				NLGFSPEDREENVR	TRUE
				TDAETLPALK	TRUE
O43264	ZW10	4	4	ASFVTEVLAHSGR	TRUE
				DSVVLSLLK	TRUE
				LSEDIDLLK	TRUE
				NLMTSEIHNTVK	TRUE
O43278	SPINT1	6	6	EGFINYLTR	TRUE
				GSSGAQATFPQGPSMER	TRUE
				SFVYGGCLGNK	TRUE
				TQGFGGSGIPK	TRUE
				VQPQEPLVLK	TRUE
				YTSGFDELQR	TRUE
O43281	EFS	3	3	ASGTQLAAPR	TRUE
				LPSAESLSR	TRUE
				LVFVGDTLGR	TRUE
O43290	SART1	10	10	ADDLLPLGDQTQDGDFGSR	TRUE
				EAAGTTAAAGTGGATEQPPR	TRUE
				EGETMILTLK	TRUE
				GLLETTVQK	TRUE
				LEQGGTADGLR	TRUE
				LQAQSLSTVGPR	TRUE
				MSSSDTPLGTVALLQEK	TRUE
				QLQQLQQLR	TRUE
				SLPSAVYCIEDK	TRUE
				SMNANTITK	TRUE
O43291	SPINT2	1	1	NAADSSVPSAPR	TRUE
O43293	DAPK3	2	2	ESLTEDEATQFLK	TRUE
				GALLGTSGLK	TRUE
O43294	TGFB1I1	7	7	ASATSATLELDR	TRUE
				CGFCNQPIR	TRUE
				DFLQLFAPR	TRUE
				DGAPFCPECYFER	TRUE
				GSLCATCGLPVTGR	TRUE
				GSLDTMLGLLQSDLSR	TRUE
				LMASLSDFR	TRUE
O43295	SRGAP3	2	1	FQDLISTIK	TRUE
				GLENPLFPK	FALSE
O43299	AP5Z1	2	2	ATELLTLLK	TRUE
				DANTALPLALR	TRUE
O43301	HSPA12A	5	5	ATAIDIATSK	TRUE
				EIQTLMQFGDTEIK	TRUE
				ETAPTSAYSSPAR	TRUE
				LDLTGTSGTAVPAR	TRUE
				TPTTILLTPER	TRUE
O43310	CTIF	1	1	SPDTLAPVASER	TRUE
O43314	PPIP5K2	4	4	ILPTPPATLK	TRUE
				LENTMELYR	TRUE
				SSVYSPESNVR	TRUE
				TAEISSTALR	TRUE
O43318	MAP3K7	3	3	MITTSGPTSEKPTR	TRUE
				MSADMSEIEAR	TRUE
				SIQDLTVTGTEPGQVSSR	TRUE
O43324	EEF1E1	2	2	AAAAELSLLEK	TRUE
				VTQVDGHSSK	TRUE
O43347	MSI1	1	1	EVMSPTGSAR	TRUE
O43353	RIPK2	3	3	GASGTVSSAR	TRUE
				SLPAPQDNDFLSR	TRUE
				SPSLNLLQNK	TRUE
O43390	HNRNPR	14	11	DLYEDELVPLFEK	TRUE
				EFNEEGALSVLQQFK	TRUE
				ENILEEFSK	TRUE
				GFCFLEYEDHK	FALSE
				LCDSYEIRPGK	TRUE
				LMMDPLSGQNR	TRUE
				NLATTVTEEILEK	TRUE
				SAFLCGVMK	FALSE
				STAYEDYYYHPPPR	TRUE
				TGYTLDVTTGQR	FALSE
				TKENILEEFSK	TRUE
				TLIEAGLPQK	TRUE
				VTEGLVDVILYHQPDDK	TRUE
				YGGPPPDSVYSGVQPGIGTEVFVGK	TRUE
O43395	PRPF3	6	6	LFEAVEEGR	TRUE
				LGLMPPPEPK	TRUE
				LQAEISQAAR	TRUE
				QCPTENMAR	TRUE
				QLSFISPPTPQPK	TRUE
				VLGTEAVQDPTK	TRUE
O43396	TXNL1	6	6	FQGPDNGQGPK	TRUE
				GYMDLMPFINK	TRUE
				IAPAFSSMSNK	TRUE
				IDQYQGADAVGLEEK	TRUE
				SEPTQALELTEDDIKEDGIVPLR	TRUE
				VGVKPVGSDPDFQPELSGAGSR	TRUE
O43399	TPD52L2	10	10	AELTKVEEEIVTLR	TRUE
				GLLSDSMTDVPVDTGVAAR	TRUE
				KTQETLSQAGQK	TRUE
				LGLSTLGELK	TRUE
				MDSAGQDINLNSPNK	TRUE
				TPAVEGLTEAEEEELRAELTK	TRUE
				TQETLSQAGQK	TRUE
				TSAALSTVGSAISR	TRUE
				VEEEIVTLR	TRUE
				VTQSDLYKK	TRUE
O43402	EMC8	2	2	ISASLLDSR	TRUE
				VKDASPNQVAEK	TRUE
O43405	COCH	1	1	GVISNSGGPVR	TRUE
O43414	ERI3	1	1	EGLLDPNVK	TRUE
O43422	THAP12	2	2	INSGEEVLR	TRUE
				STQSDLAFFR	TRUE
O43426	SYNJ1	5	5	ALLTTGSLR	TRUE
				ASPTLDFTER	TRUE
				GFEANAPAFDR	TRUE
				TAAPGNPFR	TRUE
				VTSTEFISLR	TRUE
O43432	EIF4G3	9	7	AAIIADSSTFR	TRUE
				DITEEIMSGGGSR	TRUE
				FSALQPPAPSGSTPSTPVEFDSR	TRUE
				GPDFTPAFADFGR	TRUE
				IRDPNQGGK	FALSE
				MDQYFNQMEK	FALSE
				QLTGGVDVER	TRUE
				VDEGGWNTVQGAK	TRUE
				VGVESTLER	TRUE
O43439	CBFA2T2	2	2	AFEVIATER	TRUE
				VCTISPAPR	TRUE
O43447	PPIH	4	4	GPFADENFK	TRUE
				IELFADVVPK	TRUE
				IIDGLLVMR	TRUE
				LPVVISQCGEM	TRUE
O43451	MGAM	1	1	QLDFTLSPK	TRUE
O43462	MBTPS2	1	1	AVEATQVCR	TRUE
O43464	HTRA2	5	5	AQLTAVTPDTR	TRUE
				EPLPTLPLGR	TRUE
				NSSSGISGSQR	TRUE
				SQYNFIADVVEK	TRUE
				TQSQLAVQIR	TRUE
O43474	KLF4	1	1	TTPTLGLEEVLSSR	TRUE
O43488	AKR7A2	5	4	ALQAAYGASAPSVTSAALR	TRUE
				MDAPASAAAVR	TRUE
				RMDAPASAAAVR	TRUE
				SQLETSLKR	FALSE
				VASVLGTMEMGR	TRUE
O43490	PROM1	10	10	ANSLPPGNLR	TRUE
				LICEPYTSK	TRUE
				LSLSQLNSNPELR	TRUE
				MNYDSYLAQTGK	TRUE
				NLQDFAACGIDR	TRUE
				QLPPVDAELDNVNNVLR	TRUE
				QTTTVVAGIK	TRUE
				SSLNDPLCLVHPSSETCNSIR	TRUE
				TDLDGLVQQGYQSLNDIPDR	TRUE
				TLLNETPEQIK	TRUE
O43491	EPB41L2	18	18	APHLQLIEGK	TRUE
				DYFGLLFQESPEQK	TRUE
				EISPGSGPGEIR	TRUE
				EQHPDMSVTR	TRUE
				EVPIVQTETK	TRUE
				FYPPDPSQLTEDITR	TRUE
				GLSPAQADSQFLENAK	TRUE
				GSQPPPAAESQSSLR	TRUE
				IVITGDGDIDHDQALAQAIR	TRUE
				LVSPEQPPK	TRUE
				SLDGAPIGVMDQSLMK	TRUE
				TEISTKEVPIVQTETK	TRUE
				TEMVTISDASQR	TRUE
				TTEVGSVSEVK	TRUE
				TTEVGSVSEVKK	TRUE
				VEGDNIYVR	TRUE
				VEMQPTELVSK	TRUE
				VTLLDGTEYSCDLEK	TRUE
O43493	TGOLN2	2	2	SHPELQTPK	TRUE
				SHPEPQTPK	TRUE
O43504	LAMTOR5	2	2	GTLSDEHAGVISVLAQQAAK	TRUE
				MEATLEQHLEDTMK	TRUE
O43505	B4GAT1	2	2	EPGEFALLR	TRUE
				YEAAVPDPR	TRUE
O43516	WIPF1	6	6	ALPATPQLPSR	TRUE
				GAPPLPPIPR	TRUE
				GSPPVPGGPR	TRUE
				GTALGGGSIR	TRUE
				NLSLSSSTPPLPSPGR	TRUE
				SGPLPPPPPVSR	TRUE
O43520	ATP8B1	9	8	EIQVGDVIR	TRUE
				GADTVIYER	TRUE
				GYADLISSGR	TRUE
				LQDGVPETISK	FALSE
				MSLEITDQYLQR	TRUE
				NTSFPLDADK	TRUE
				SAYAFSHQR	TRUE
				SPLDAIVADGTAEYR	TRUE
				TDGQLNYQAASPDEGALVNAAR	TRUE
O43524	FOXO3	2	2	AALQTAPESADDSPSQLSK	TRUE
				SSSFPYTTK	TRUE
O43556	SGCE	3	3	EVENPQNQLR	TRUE
				QVSTYQEVIR	TRUE
				VPLPINDLK	TRUE
O43566	RGS14	3	3	ELGGTANAALR	TRUE
				LQEALQPILEK	TRUE
				LVLDTLPGVK	TRUE
O43572	AKAP10	1	1	VSDLGQFIR	TRUE
O43583	DENR	2	2	AADISESSGADCK	TRUE
				FSCGASVTGEDEIIIQGDFTDDIIDVIQEK	TRUE
O43586	PSTPIP1	3	3	AGGQTEINSLR	TRUE
				GFVPGSYLEK	TRUE
				TTCEAFQLQEFDR	TRUE
O43592	XPOT	5	5	ALAYFEQLK	TRUE
				ASALQDMMR	TRUE
				NAQEALQAIETK	TRUE
				NLLTPLMEK	TRUE
				QLTVLSDQQK	TRUE
O43597	SPRY2	1	1	SISTVSSGSR	TRUE
O43598	DNPH1	3	3	FGTVLTEHVAAAELGAR	TRUE
				ILCLFRPQSGR	TRUE
				YFEADPPGQVAASPDPTT	TRUE
O43609	SPRY1	2	2	EIQPTAILSLDQIK	TRUE
				GSNEYTEGPSVVK	TRUE
O43615	TIMM44	5	5	ALSQGVESVK	TRUE
				ALSQGVESVKK	TRUE
				ILDIDNVDLAMGK	TRUE
				LGELTGTVK	TRUE
				TEMSEVLTEILR	TRUE
O43617	TRAPPC3	1	1	GALEMVQMAVEAK	TRUE
O43633	CHMP2A	2	2	ANIQAVSLK	TRUE
				SNNSMAQAMK	TRUE
O43639	NCK2	5	5	DSESSPSDFSVSLK	TRUE
				GVEGDFLIR	TRUE
				IYDLNIPAFVK	TRUE
				TEEVIVIAK	TRUE
				TGYVPSNYVER	TRUE
O43660	PLRG1	1	1	MPSESAAQSLAVALPLQTK	TRUE
O43665	RGS10	1	1	ASSQVNVEGQSR	TRUE
O43670	ZNF207	2	2	ETIDAVPNAIPGR	TRUE
				LLEQKTQESQK	TRUE
O43676	NDUFB3	1	1	IEGTPLETIQK	TRUE
O43678	NDUFA2	5	5	AAAAASRGVGAK	TRUE
				ALENVLSGK	TRUE
				ALENVLSGKA	TRUE
				ANPDLPILIR	TRUE
				YAFGQETNVPLNNFSADQVTR	TRUE
O43679;Q86U70	LDB2;LDB1	1	0	MVAPPAEPTR	FALSE
O43681	GET3	3	3	LEETLPVIR	TRUE
				LLNFPTIVER	TRUE
				LPLLPHEVR	TRUE
O43684	BUB3	7	7	LNQPPEDGISSVK	TRUE
				LYDVPANSMR	TRUE
				QGYVLSSIEGR	TRUE
				TPCNAGTFSQPEK	TRUE
				VAVEYLDPSPEVQK	TRUE
				VAVEYLDPSPEVQKK	TRUE
				VYTLSVSGDR	TRUE
O43687;Q9P0M2	AKAP7	1	0	AVQQYLEETQNK	FALSE
O43704	SULT1B1	6	6	FDAIYETEMSK	TRUE
				NYFTVAQNEK	TRUE
				THLPTDLLPK	TRUE
				TSGIEQLEK	TRUE
				TSGIEQLEKNPSPR	TRUE
				VPMLEMTLPGLR	TRUE
O43707	ACTN4	18	18	ACLISLGYDVENDR	TRUE
				AGTQIENIDEDFRDGLK	TRUE
				DDPVTNLNNAFEVAEK	TRUE
				DYETATLSDIK	TRUE
				ETTDTDTADQVIASFK	TRUE
				GISQEQMQEFR	TRUE
				KDDPVTNLNNAFEVAEK	TRUE
				LSGSNPYTTVTPQIINSK	TRUE
				LVSIGAEEIVDGNAK	TRUE
				MAPYQGPDAVPGALDYK	TRUE
				MLDAEDIVNTARPDEK	TRUE
				NFITAEELR	TRUE
				QFASQANVVGPWIQTK	TRUE
				QLEAIDQLHLEYAK	TRUE
				SFSTALYGESDL	TRUE
				STLPDADRER	TRUE
				VLAGDKNFITAEELR	TRUE
				VLAVNQENEHLMEDYEK	TRUE
O43708	GSTZ1	2	2	DFQALNPMK	TRUE
				QPDTPTELRA	TRUE
O43709	BUD23	1	1	EVRPDTQYTGR	TRUE
O43715	TRIAP1	1	1	GDSSGDPCTDLFK	TRUE
O43716	GATC	2	2	LALVDFGSR	TRUE
				VVEEYFVAPPGNISLPK	TRUE
O43719	HTATSF1	2	2	GDGLCCYLK	TRUE
				MQELYGDGK	TRUE
O43739;Q99418	CYTH3;CYTH2	2	0	GIIPLENLSIR	FALSE
				GINEGGDLPEELLR	FALSE
O43741	PRKAB2	2	2	IMVGSTDDPSVFSLPDSK	TRUE
				SDFEVFDALK	TRUE
O43745	CHP2	2	2	ETGFSQASLLR	TRUE
				IIESFFPDGSQR	TRUE
O43747	AP1G1	4	4	ADCASGIFLAAEK	TRUE
				AVEYNALFK	TRUE
				TVQTDHNAVQR	TRUE
				VLTTAGSYVR	TRUE
O43752	STX6	3	3	AVNTAQGLFQR	TRUE
				DQMSTSSVQALAER	TRUE
				SMEDPFFVVK	TRUE
O43760	SYNGR2	3	3	DVLVGADSVR	TRUE
				FLTQPQVVAR	TRUE
				MESGAYGAAK	TRUE
O43761	SYNGR3	2	2	AGAALDPVSFAR	TRUE
				MEGASFGAGR	TRUE
O43765	SGTA	5	5	AICIDPAYSK	TRUE
				AIELNPANAVYFCNR	TRUE
				LGNYAGAVQDCER	TRUE
				MGLALSSLNK	TRUE
				TPPSEEDSAEAER	TRUE
O43768	ENSA	3	2	NLVTGDHIPTPQDLPQR	TRUE
				QLPSAGPDK	TRUE
				YFDSGDYNMAK	FALSE
O43772	SLC25A20	1	1	ADQPKPISPLK	TRUE
O43776	NARS1	5	5	EPFPTIYVDSQK	TRUE
				IFDSEEILAGYK	TRUE
				LEDLVCDVVDR	TRUE
				LMTDTINEPILLCR	TRUE
				LTESVDVLMPNVGEIVGGSMR	TRUE
O43795	MYO1B	13	11	EICELTGIDQSVLER	TRUE
				EQLLQSNPVLEAFGNAK	FALSE
				IIIAEVVNK	TRUE
				LEDLATLIQK	TRUE
				LGNIEFKPESR	TRUE
				MPSLSPIDK	TRUE
				QAYEPCLER	TRUE
				SEVPLVDVTK	TRUE
				SLFPEGNPAK	TRUE
				SLPIYSPEK	TRUE
				SLPIYSPEKVEEYR	TRUE
				YLGLLENVR	FALSE
				YNYLSLDSAK	TRUE
O43805	SSNA1	1	1	TQQGAALQNYNNELVK	TRUE
O43809	NUDT21	5	5	EPLYEKDSSVAAR	TRUE
				LFLVQLQEK	TRUE
				LPGGELNPGEDEVEGLKR	TRUE
				TINLYPLTNYTFGTK	TRUE
				YIQQTKPLTLER	TRUE
O43813	LANCL1	3	3	AFPNPYADYNK	TRUE
				IDPHAPNEMLYGR	TRUE
				SLAEGYFDAAGR	TRUE
O43815	STRN	9	9	DVDELPSLQPSVGSPSRPSSSR	TRUE
				GLGPLAEAAAAGDGAAAAGAAR	TRUE
				GYTSIFNMETQQR	TRUE
				LLSCSADGTLR	TRUE
				LQDMLANLR	TRUE
				SELTDSASVLDNFK	TRUE
				STSLDVEPIYTFR	TRUE
				SVIDTSTIVR	TRUE
				TCIQEFTAHR	TRUE
O43818	RRP9	4	4	DAVSGLAFR	TRUE
				EIQAPASADIR	TRUE
				LKEDVLEQR	TRUE
				RVPVPPAAGS	TRUE
O43819	SCO2	2	2	LLGLTGSTK	TRUE
				SAEQISDSVR	TRUE
O43823	AKAP8	1	1	IQFACSVCK	TRUE
O43824	GTPBP6	3	3	AELDAAVLK	TRUE
				ALTGDAAIQPR	TRUE
				GEPLLPAGTQR	TRUE
O43826	SLC37A4	1	1	AGLSNYGNPR	TRUE
O43837	IDH3B	4	4	DMGGYSTTTDFIK	TRUE
				GELASYDMR	TRUE
				LEQVLSSMK	TRUE
				NIANPTAMLLSASNMLR	TRUE
O43847	NRDC	6	6	AFDCPETEYPVK	TRUE
				ANLVLLSGANEGK	TRUE
				GSLSNAGDPEIVK	TRUE
				IEEFLSSFEEK	TRUE
				LVAGEHGLIIR	TRUE
				TVFQFDVQR	TRUE
O43852	CALU	6	6	DGFVTVDELK	TRUE
				LTKEEIVDK	TRUE
				MADKDGDLIATK	TRUE
				TEREQFVEFR	TRUE
				TFDQLTPEESK	TRUE
				TFDQLTPEESKER	TRUE
O43861	ATP9B	4	3	ADQIPLYPVR	TRUE
				SAAAAAANR	TRUE
				TGTLTQNEMIFK	FALSE
				TSTIPEELGR	TRUE
O43865	AHCYL1	7	4	AQGEKPLAGAK	FALSE
				EIEIAEQDMSALISLR	TRUE
				GIVEESVTGVHR	FALSE
				LCVPAMNVNDSVTK	FALSE
				QIQFADDMQEFTK	TRUE
				SMPDAMPLPGVGEELK	TRUE
				TTDVMFGGK	TRUE
O43866	CD5L	4	4	EATLQDCPSGPWGK	TRUE
				ELGCGAASGTPSGILYEPPAEK	TRUE
				LADGPGHCK	TRUE
				LVGGDNLCSGR	TRUE
O43895	XPNPEP2	4	4	DSIQAYSLGDVR	TRUE
				LIFPAATSGR	TRUE
				LVTDTYSPVMMTK	TRUE
				VLIGNIDLSR	TRUE
O43896	KIF1C	6	5	ELLEQQGIDIK	TRUE
				EQLPPTTVQTIVK	TRUE
				LTGILQEVK	TRUE
				LVTEPLVLK	TRUE
				TVAATNMNETSSR	FALSE
				YPPYTTPPR	TRUE
O43914	TYROBP	1	1	ITETESPYQELQGQR	TRUE
O43924	PDE6D	2	2	ELNFSSTEQMEK	TRUE
				FFDDDLLVSTSR	TRUE
O43929	ORC4	2	2	QLNLENVVGDK	TRUE
				YPNCPTDVR	TRUE
O43933	PEX1	2	2	DQLFSQPPVLR	TRUE
				YIGASEQAVR	TRUE
O60216	RAD21	5	5	CLTPLVPEDLR	TRUE
				LQESVMEASR	TRUE
				TGAESISLLELCR	TRUE
				TNIDESAMPPPPPQGVK	TRUE
				TQQMLHGLQR	TRUE
O60218	AKR1B10	3	1	ATFVELSTK	FALSE
				IVENIQVFDFK	TRUE
				LSDEEMATILSFNR	FALSE
O60220	TIMM8A	3	3	AEACFVNCVER	TRUE
				FIDTSQFILNR	TRUE
				SKPVFSESLSD	TRUE
O60229	KALRN	3	1	GGPILTFPAR	FALSE
				LDQCQQYVVFER	FALSE
				LQGFEGTLTAQGK	TRUE
O60231	DHX16	6	6	EQLEGLLER	TRUE
				FSTFFDDAPVFR	TRUE
				IFQPTPPGAR	TRUE
				LGNEVGYSIR	TRUE
				VAAMSVAAR	TRUE
				VLVASATMDTAR	TRUE
O60234	GMFG	5	4	ETDNAAIIMK	TRUE
				KETDNAAIIMK	TRUE
				LVQTAELTK	FALSE
				QMVVLEEEFQNISPEELK	TRUE
				TTDDLTEAWLQEK	TRUE
O60237	PPP1R12B	4	4	LIESDLNSK	TRUE
				LQEAQLELADIK	TRUE
				LYESALTENQK	TRUE
				SSVLEMEKR	TRUE
O60238	BNIP3L	1	1	ILLDAQHESGQSSSR	TRUE
O60240	PLIN1	8	8	AMSLSDALK	TRUE
				ASGAPSAGPEPAPR	TRUE
				GLTLLDGDLPEQENVLQR	TRUE
				LASGGADLALGSIEK	TRUE
				LSLMEPESEFR	TRUE
				RASGAPSAGPEPAPR	TRUE
				VGALTNTLSR	TRUE
				VLHLTPAPAVSSTK	TRUE
O60245	PCDH7	2	2	VATVLATDADSGK	TRUE
				VLITDVNDNSPR	TRUE
O60256	PRPSAP2	2	1	EKPPITVVGDVGGR	FALSE
				VQVYQEPNR	TRUE
O60262	GNG7	2	2	NDPLLVGVPASENPFK	TRUE
				SATNNIAQAR	TRUE
O60264	SMARCA5	10	7	CNTLITLIER	TRUE
				DIDILNSAGK	TRUE
				FEDSPSYVK	TRUE
				FITDNTVEER	TRUE
				LDSIVIQQGR	FALSE
				NPELPNAAQAQK	TRUE
				QNLLSVGDYR	TRUE
				SVCLIGDKEQR	TRUE
				VLIFSQMTR	FALSE
				YLVIDEAHR	FALSE
O60266	ADCY3	1	1	SSSPALIETK	TRUE
O60268	KIAA0513	1	1	LLSDHIEQMATE	TRUE
O60271	SPAG9	8	6	AGPSAQEPGSQTPLK	TRUE
				FFVAVPGQVISPQSSSSGTDLTGDK	TRUE
				ITALMVSCNR	TRUE
				LFSSSSNTTK	TRUE
				LMELQEAVR	FALSE
				SSTLSQLPGDK	TRUE
				VSGLAGSIYR	FALSE
				VTDAPNKSEISK	TRUE
[truncated: 31,283 more rows]
