# Supplementary material
Source: Research Square preprint supplement (doi:10.21203/rs.3.rs-9258373/v1)
Supplement: Supplementary file 6 [file 6dc38849c7569eeda206b0b5.xlsx]

## Sheet: Biological-rPSL
Gene	Number of unique peptides	List of Peptides
BTC	4	SPETNGLLCGDPEENCAATTTQSK, FVVAEQTPSCVCDEGYIGAR, CRFVVAEQTPSCVCDEGYIGAR, SPETNGLLCGDPEENCAATTTQSKR
C1QC	10	FNAVLTNPQGDYDTSTGK, TNQVNSGGVLLR, FQSVFTVTR, VVTFCGHTSK, QKFQSVFTVTR, QTHQPPAPNSLIR, GEPGIPAIPGIRGPK, GEPGIPAIPGIR, FNAVLTNPQGDYDTSTGKFTCK, DGYDGLPGPK
CDX2	5	DVSMYPSSVR, AELAATLGLSER, KPAQQSLGSQVK, KAELAATLGLSER, LQQQQQQQPPQPPPPPPQPPQPQPGPLR
CEACAM5	11	CETQNPVSAR, SDLVNEEATGQFR, TLTLFNVTR, AYVCGIQNSVSANR, INGIPQQHTQVLFIAK, NSGLYTCQANNSASGHSR, QIIGYVIGTQQATPGPAYSGR, RSDSVILNVLYGPDAPTISPLNTSYR, ITPNNNGTYACFVSNLATGR, SDSVILNVLYGPDAPTISPLNTSYR, SDPVTLDVLYGPDTPIISPPDSSYLSGANLNLSCHSASNPSPQYSWR
CPQ	19	GEESAVMLEPR, TQGAVEAAK, VGALASLIR, AIINLAVYGK, LALLVDTVGPR, TVQYRTQGAVEAAK, TQGAVEAAKVGALASLIR, GKIVVYNQPYINYSR, IPTACITVEDAEMMSR, AIQIMYQNLQQDGLEK, TFEEIKEEIASCGDVAK, TYPDTDSFNTVAEITGSK, SVASFSIYSPHTGIQEYQDGVPK, EEIASCGDVAK, MGAKTYPDTDSFNTVAEITGSK, LVLWTAEEQGGVGAFQYYQLHK, IVVYNQPYINYSR, VNISNYSLVMESDAGTFLPTGLQFTGSEK, IAILGLGSSIGTPPEGITAEVLVVTSFDELQR
CXCL10	3	LEIIPASQFCPR, CTCISISNQPVNPR, SLEKLEIIPASQFCPR
CXCL12	2	ILNTPNCALQIVAR, LKWIQEYLEK
CXCR3	3	RDSSWSETSEASYSGL, LNATHCQYNFPQVGR, DSSWSETSEASYSGL
EGF	1	YACNCVVGYIGER
ELF3	8	YDASAIDFSR, EYWDCLEGK, SEAVAQLWGQK, NKYDASAIDFSR, ASWLGEQPQFWSK, DILIHPELNEGLMK, CDMDGATLCNCALEELR, TQVLDWISYQVEK
FOXP3	8	GPGGTFQGR, WAILEAPEK, EAPDSLFAVR, EMVQSLEQQLVLEK, EMVQSLEQQLVLEKEK, GSCCIVAAGSQGPVVPAWSGPR, ASSVASSDK, VFEEPEDFLK
IL1B	3	GGQDITDFTMQFVSS, SLVMSGPYELK, NLYLSCVLK
ITGAV	56	QVVCDLGNPMK, TCSLPGTALK, ISSLQTTEK, MFLLVGAPK, YDPNVYSIK, NNGPSSFSK, GKSAILYVK, AGTQLLAGLR, LNGFEVFAR, KGIVYIFNGR, SHQWFGASVR, IVCQVGRLDR, ENQNHSYSLK, SMPPSFGYSMK, LEVSVDSDQKK, AMLHLQWPYK, DYAKDDPLEFK, LTPITIFMEYR, ILACAPLYHWR, CQPIEFDATGNR, LQEVGQVSVSLQR, EPVGTCFLQDGTK, SSASFNVIEFPYK, FDLQIQSSNLFDK, RCQPIEFDATGNR, IYIGDDNPLTLIVK, NGYPDLIVGAFGVDR, FSVHQQSEMDTSVK, DKLTPITIFMEYR, GGLMQCEELIAYLR, QE…
ITGB1	18	CDDLEALKK, SLGTDLMNEMR, FCECDNFNCDR, LSEGVTISYK, LPQPVQPDPVSHCK, GICECGVCK, TVMPYISTTPAK, GEVFNELVGK, SGEPQTFTLK, GCPPDDIENPR, DNTNEIYSGK, IGFGSFVEK, SAVTTVVNPK, LKPEDITQIQPQQLVLR, WDTGENPIYK, NVLSLTNKGEVFNELVGK, SNGLICGGNGVCK, SCGECIQAGPNCGWCTNSTFLQEGMPTSAR
ITGB6	27	TIIHSINEK, LIPGATVGLLQK, EAPDHPSCSGR, HILPLTNDAER, CPTCGDPCNSKR, LRPGGAQTLQVHVR, SCIECHLSAAGQAR, CVCTNPGASGPTCER, CECGEDMLSTDSCK, LGFGSFVEKPVSPFVK, GLLCGGNGDCDCGECVCR, NEYSMSTVLEYPTIGQLIDK, ISANIDTPEGGFDAIMQAAVCK, TTPEEIANPCSSIPYFCLPTFGFK, GDCYCGQCICHLSPYGNIYGPYCQCDNFSCVR, DSGNILQLIISAYEELR, CPTCGDPCNSK, ISANIDTPEGGFDAIMQAAVCKEK, SGWTGEYCNCTTSTDSCVSEDGVLCSGR, QTEDYPVDLYYLMDLSASMDDDLNTIK, CDTPANLL…
KPNA2	6	EKQPPIDNIIR, QPPIDNIIR, TGVVPQLVK, NVSSFPDDATSPLQENR, LLGASELPIVTPALR, EATWTMSNITAGR
KRT17	5	GSSGLGGGSSR, LSGGLGAGSCR, ASLEGNLAETENR, TMQALEIELQSQLSMK, YCVQLSQIQGLIGSVEEQLAQLR
KRT20	20	SLSSSLQAPVVSTVGMQR, VFDDLTLHK, TVVQEVVDGK, TTEYQLSTLEER, TDLEIQIEELNK, GTEVQLTELR, MAMQNLNDR, SQIKDAQLQNAR, CVLQIDNAK, QWYETNAPR, GTEVQLTELRR, VVSSEVKEVEENI, QNNEYHILLDIK, ESLEHTLEETK, LGTTPSVYGGAGGR, LTVEADLQGLNK, QTAVLQQQVTVNTEELK, IKTVVQEVVDGK, TLEQSNSKLEVQIK, HTVNYGSDLTGGGDLFVGNEK
MIA	4	GQVVYVFSK, LGYFPSSIVREDQTLKPGK, LGYFPSSIVR, TDKWDFYCQ
MMP2	28	FQGTSYDSCTTEGR, VDAAFNWSK, YGNADGEYCK, EYNSCTDTGR, WDKNQITYR, WCGTTEDYDR, QDIVFDGIAQIR, IDAVYEAPQEEK, VKYGNADGEYCK, AFQVWSDVTPLR, GAYYLKLENQSLK, IHDGEADIMINFGR, MWCATTANYDDDRK, GYPKPLTSLGLPPDVQR, SDGFLWCSTTYNFEK, IIGYTPDLDPETVDDAFAR, SDGFLWCSTTYNFEKDGK, YGFCPHEALFTMGGNAEGQPCK, GIQELYGASPDIDLGTGPTPTLGPVTPEICK, WEHGDGYPFDGK, YESCTSAGR, GEIFFFKDR, WCGTTEDYDRDK, MWCATTANYDDDR, YGFCPETAMSTVGGNSEGAPCVF…
MMP3	18	DAVDSAVEK, KIDAAISDK, NSMEPGFPK, IDAAISDKEK, GEILIFKDR, CGVPDVGHFR, IVNYTPDLPK, RNSMEPGFPK, LDSDTLEVMR, GEDTSMNLVQK, GIHTLGFPPTVR, TYFFVEDKYWR, IVNYTPDLPKDAVDSAVEK, NKTYFFVEDK, LEPELHLISSFWPSLPSGVDAAYEVTSK, QIAEDFPGIDSK, LYEGEADIMISFAVR, FLGLEVTGKLDSDTLEVMR
MMP9	27	AVIDDAFAR, QSTLVLFPGDLR, SYSACTTDGR, SLGPALLLLQK, QLAEEYLYR, EYSTCTSEGR, DKLFGFCPTR, WCATTANYDR, GSRPQGPFLIADK, LGLGADVAQVTGALR, WCATTANYDRDK, QVWVYTGASVLGPR, LWCATTSNFDSDKK, QLSLPETGELDSATLK, FTEGPPLHKDDVNGIR, MFPGVPLDTHDVFQYR, FGNADGAACHFPFIFEGR, SDGLPWCSTTANYDTDDR, SELNQVDQVGYVTYDILQCPED, FTEGPPLHK, LWCATTSNFDSDK, AFALWSAVTPLTFTR, ADSTVMGGNSAGELCVFPFTFLGK, VSSRSELNQVDQVGYVTYDILQCPED, FQTFEGDLK…
MUC1	9	YVPPSSTDR, DISEMFLQIYK, SSVPSSTEK, QGGFLGLSNIK, NYGQLDIFPAR, KNYGQLDIFPAR, YVPPSSTDRSPYEK, EGTINVHDVETQFNQYK, EGTINVHDVETQFNQYKTEAASR
MUC16	2	TLTLNFTISNLQYSPDMGK, VDLLCTYLQPLSGPGLPIK
PFN1	11	TDKTLVLLMGK, DSPSVWAAVPGK, DSLLQDGEFSMDLR, STGGAPTFNVTVTK, EGVHGGLINK, SSFYVNGLTLGGQK, TKSTGGAPTFNVTVTK, TFVNITPAEVGVLVGK, TFVNITPAEVGVLVGKDR, CYEMASHLR, STGGAPTFNVTVTKTDK
PLAUR	11	VEECALGQDLCR, SGCNHPDLDVQYR, LWEEGEELELVEK, GPMNQCLVATGTHEPK, CNEGPILELENLPQNGR, YLECISCGSSDMSCER, GNSTHGCSSEETFLIDCR, TNGDCRVEECALGQDLCR, SRYLECISCGSSDMSCER, SPEEQCLDVVTHWIQEGEEGRPK, ITSLTEVVCGLDLCNQGNSGR
PTEN	18	KGVTIPSQR, GVTIPSQRR, EYLVLTLTK, IYSSNSGPTR, IYSSNSGPTRR, VKIYSSNSGPTR, AQEALDFYGEVR, TGVMICAYLLHR, YSDTTDSDPENEPFDEDQHTQITK, TVEEPSNPEASSSTSVTPDVSDNEPDHYR, VENGSLCDQEIDSICSIER, TAIIKEIVSR, EDKFMYFEFPQPLPVCGDIK, ADNDKEYLVLTLTK, YQEDGFDLDLTYIYPNIIAMGFPAER, YVYYYSYLLK, FMYFEFPQPLPVCGDIK, MMFETIPMFSGGTCNPQFVVCQLK
S100A8	3	LLETECPQYIR, KLLETECPQYIR, ALNSIIDVYHK
S100A9	4	TCKMSQLER, VIEHIMEDLDTNADK, NIETIINTFHQYSVK, LGHPDTLNQGEFK
SATB1	17	DMNQSSLAK, NTNTLFSVK, FLSLPQPER, TLWENLSMIR, AMQNFLQLPEAER, LEDLPPEQWSHTTVR, LPPRQPTVASPAESDEENR, LLAQQSLNQQYLNHPPPVSR, SLNAASAMGPAPLISTPPSRPPQVK, LEQNGSPLGR, ECPLSQSMISSIVNSTYYANVSAAK, EEDPKTASQSLLVNLR, AMQNFLQLPEAERDR, AGISQAVFAR, DLEESVQDK, QPTVASPAESDEENR, LEEELSVEGNTDINTDLK
TIMP1	6	GFQALGDAADIR, SEEFLIAGK, FVYTPAMESVCGYFHR, LQSGTHCLWTDQLLQGSEK, EPGLCTWQSLR, TYTVGCEECTVFPCLSIPCK
TIMP2	5	GAAPPKQEFLDIEDP, SDGSCAWYR, EVDSGNDIYGNPIK, AVSEKEVDSGNDIYGNPIK, EVDSGNDIYGNPIKR
TP53	17	LGFLHSGTAK, ELNEALELK, TYQGSYGFR, QSQHMTEVVR, SVTCTYSPALNK, ALPNNTSSSPQPK, GEPHHELPPGSTK, VEYLDDRNTFR, RALPNNTSSSPQPK, VEGNLRVEYLDDR, KPLDGEYFTLQIR, ELNEALELKDAQAGK, CSDSDGLAPPQHLIR, MPEAAPPVAPAPAAPTPAAPAPAPSWPLSSSVPSQK, LMFKTEGPDSD, LLPENNVLSPLPSQAMDDLMLSPDDIEQWFTEDPGPDEAPR, TCPVQLWVDSTPPPGTR
TYMS	8	AEDFQIEGYNPHPTIK, DFLDSLGFSTR, DEFPLLTTK, TGTGTLSVFGMQAR, EEGDLGPVYGFQWR, DMESDYSGQGVDQLQR, IDDFKAEDFQIEGYNPHPTIK, IIMCAWNPR

## Sheet: rPSL
Gene	Number of unique peptides	List of Peptides
BTC	2	SPETNGLLCGDPEENCAATTTQSK, FVVAEQTPSCVCDEGYIGAR
C1QC	8	FQSVFTVTR, TNQVNSGGVLLR, FNAVLTNPQGDYDTSTGK, QKFQSVFTVTR, QTHQPPAPNSLIR, GEPGIPAIPGIRGPK, NGPMGPPGMPGVPGPMGIPGEPGEEGR, GEPGIPAIPGIR
CDX2	5	DVSMYPSSVR, AELAATLGLSER, KPAQQSLGSQVK, KAELAATLGLSER, LQQQQQQQPPQPPPPPPQPPQPQPGPLR
CEACAM5	9	CETQNPVSAR, SDLVNEEATGQFR, AYVCGIQNSVSANR, INGIPQQHTQVLFIAK, NSGLYTCQANNSASGHSR, ITPNNNGTYACFVSNLATGR, QIIGYVIGTQQATPGPAYSGR, SDSVILNVLYGPDAPTISPLNTSYR, SDPVTLDVLYGPDTPIISPPDSSYLSGANLNLSCHSASNPSPQYSWR
CPQ	15	TQGAVEAAK, GKIVVYNQPYINYSR, AIINLAVYGK, LALLVDTVGPR, EEIASCGDVAK, GEESAVMLEPR, IVVYNQPYINYSR, TQGAVEAAKVGALASLIR, IPTACITVEDAEMMSR, AIQIMYQNLQQDGLEK, TFEEIKEEIASCGDVAK, TYPDTDSFNTVAEITGSK, SVASFSIYSPHTGIQEYQDGVPK, LVLWTAEEQGGVGAFQYYQLHK, VNISNYSLVMESDAGTFLPTGLQFTGSEK
CXCL10	3	LEIIPASQFCPR, CTCISISNQPVNPR, SLEKLEIIPASQFCPR
CXCL12	2	ILNTPNCALQIVAR, LKWIQEYLEK
CXCR3	1	LNATHCQYNFPQVGR
EGF	1	YACNCVVGYIGER
ELF3	8	YDASAIDFSR, EYWDCLEGK, SEAVAQLWGQK, NKYDASAIDFSR, ASWLGEQPQFWSK, TQVLDWISYQVEK, DILIHPELNEGLMK, CDMDGATLCNCALEELR
FOXP3	5	WAILEAPEK, EAPDSLFAVR, EMVQSLEQQLVLEK, GSCCIVAAGSQGPVVPAWSGPR, VFEEPEDFLK
IL1B	2	NLYLSCVLK, SLVMSGPYELK
ITGAV	46	ENQNHSYSLK, ASGDFQTTK, MFLLVGAPK, GKSAILYVK, LNGFEVFAR, FSVHQQSEMDTSVK, YDPNVYSIK, LEVSVDSDQK, KGIVYIFNGR, SHQWFGASVR, SMPPSFGYSMK, QVVCDLGNPMK, AMLHLQWPYK, DYAKDDPLEFK, LTPITIFMEYR, ILACAPLYHWR, CQPIEFDATGNR, LQEVGQVSVSLQR, EPVGTCFLQDGTK, SSASFNVIEFPYK, FDLQIQSSNLFDK, RCQPIEFDATGNR, IYIGDDNPLTLIVK, NGYPDLIVGAFGVDR, GGLMQCEELIAYLR, KIYIGDDNPLTLIVK, QEREPVGTCFLQDGTK, CQPIEFDATGNRDYAK, GSDGKLQEVGQV…
ITGB1	10	IGFGSFVEK, GICECGVCK, SGEPQTFTLK, DNTNEIYSGK, WDTGENPIYK, TVMPYISTTPAK, FCECDNFNCDR, LKPEDITQIQPQQLVLR, LRNPCTSEQNCTSPFSYK, SCGECIQAGPNCGWCTNSTFLQEGMPTSAR
ITGB6	24	TIIHSINEK, CDTPANLLAK, LIPGATVGLLQK, EAPDHPSCSGR, HILPLTNDAER, CPTCGDPCNSK, CPTCGDPCNSKR, LAGATISEEEDFSK, LRPGGAQTLQVHVR, SCIECHLSAAGQAR, CVCTNPGASGPTCER, CECGEDMLSTDSCK, LGFGSFVEKPVSPFVK, LAGIVIPNDGLCHLDSK, DSGNILQLIISAYEELR, GLLCGGNGDCDCGECVCR, GCQLNFIENPVSQVEILK, NEYSMSTVLEYPTIGQLIDK, ISANIDTPEGGFDAIMQAAVCK, TTPEEIANPCSSIPYFCLPTFGFK, SGWTGEYCNCTTSTDSCVSEDGVLCSGR, GDCYCGQCICHLSPYGNIYGPYCQCDNFSC…
KPNA2	2	LLGASELPIVTPALR, EATWTMSNITAGR
KRT17	3	ASLEGNLAETENR, TMQALEIELQSQLSMK, YCVQLSQIQGLIGSVEEQLAQLR
KRT20	15	CVLQIDNAK, TVVQEVVDGK, VFDDLTLHK, MAMQNLNDR, GTEVQLTELR, QWYETNAPR, LGTTPSVYGGAGGR, LTVEADLQGLNK, GTEVQLTELRR, ESLEHTLEETK, SQIKDAQLQNAR, TTEYQLSTLEER, QNNEYHILLDIK, SLSSSLQAPVVSTVGMQR, QTAVLQQQVTVNTEELK
MIA	3	LGYFPSSIVR, LGYFPSSIVREDQTLKPGK, GQVVYVFSK
MMP2	24	YESCTSAGR, VDAAFNWSK, GEIFFFKDR, YGNADGEYCK, WDKNQITYR, WCGTTEDYDR, QDIVFDGIAQIR, IDAVYEAPQEEK, VKYGNADGEYCK, WEHGDGYPFDGK, AFQVWSDVTPLR, IHDGEADIMINFGR, FQGTSYDSCTTEGR, MWCATTANYDDDR, MWCATTANYDDDRK, GYPKPLTSLGLPPDVQR, SDGFLWCSTTYNFEK, IIGYTPDLDPETVDDAFAR, SDGFLWCSTTYNFEKDGK, YGFCPHEALFTMGGNAEGQPCK, GIQELYGASPDIDLGTGPTPTLGPVTPEICK, YGFCPETAMSTVGGNSEGAPCVFPFTFLGNK, LIADAWNAIPDNLDAVVDLQGGGHSYFFK, …
MMP3	15	NSMEPGFPK, IDAAISDKEK, GEILIFKDR, CGVPDVGHFR, IVNYTPDLPK, LDSDTLEVMR, GEDTSMNLVQK, NKTYFFVEDK, GIHTLGFPPTVR, QIAEDFPGIDSK, TYFFVEDKYWR, IVNYTPDLPKDAVDSAVEK, LEPELHLISSFWPSLPSGVDAAYEVTSK, FLGLEVTGKLDSDTLEVMR, LYEGEADIMISFAVR
MMP9	24	AVIDDAFAR, SYSACTTDGR, SLGPALLLLQK, QLAEEYLYR, EYSTCTSEGR, DKLFGFCPTR, WCATTANYDR, GSRPQGPFLIADK, LGLGADVAQVTGALR, WCATTANYDRDK, QVWVYTGASVLGPR, LWCATTSNFDSDK, LWCATTSNFDSDKK, AFALWSAVTPLTFTR, QLSLPETGELDSATLK, FTEGPPLHKDDVNGIR, MFPGVPLDTHDVFQYR, FGNADGAACHFPFIFEGR, SDGLPWCSTTANYDTDDR, ADSTVMGGNSAGELCVFPFTFLGK, FQTFEGDLK, QSTLVLFPGDLR, SDGLPWCSTTANYDTDDRFGFCPSER, DADIVIQFGVAEHGDGYPFDGK
MUC1	9	SSVPSSTEK, YVPPSSTDR, DISEMFLQIYK, KNYGQLDIFPAR, YVPPSSTDRSPYEK, EGTINVHDVETQFNQYK, EGTINVHDVETQFNQYKTEAASR, QGGFLGLSNIK, NYGQLDIFPAR
MUC16	2	VDLLCTYLQPLSGPGLPIK, TLTLNFTISNLQYSPDMGK
PFN1	10	STGGAPTFNVTVTK, SSFYVNGLTLGGQK, TFVNITPAEVGVLVGK, TFVNITPAEVGVLVGKDR, CYEMASHLR, TDKTLVLLMGK, TKSTGGAPTFNVTVTK, DSPSVWAAVPGK, DSLLQDGEFSMDLR, STGGAPTFNVTVTKTDK
PLAUR	10	VEECALGQDLCR, SGCNHPDLDVQYR, LWEEGEELELVEK, GPMNQCLVATGTHEPK, CNEGPILELENLPQNGR, YLECISCGSSDMSCER, GNSTHGCSSEETFLIDCR, TNGDCRVEECALGQDLCR, ITSLTEVVCGLDLCNQGNSGR, SPEEQCLDVVTHWIQEGEEGRPK
PTEN	13	IYSSNSGPTR, TAIIKEIVSR, IYSSNSGPTRR, VKIYSSNSGPTR, AQEALDFYGEVR, TGVMICAYLLHR, ADNDKEYLVLTLTK, VENGSLCDQEIDSICSIER, YSDTTDSDPENEPFDEDQHTQITK, TVEEPSNPEASSSTSVTPDVSDNEPDHYR, EDKFMYFEFPQPLPVCGDIK, FMYFEFPQPLPVCGDIK, YVYYYSYLLK
S100A8	2	ALNSIIDVYHK, LLETECPQYIR
S100A9	1	LGHPDTLNQGEFK
SATB1	11	FLSLPQPER, TLWENLSMIR, AMQNFLQLPEAER, EEDPKTASQSLLVNLR, LEDLPPEQWSHTTVR, LPPRQPTVASPAESDEENR, LLAQQSLNQQYLNHPPPVSR, SLNAASAMGPAPLISTPPSRPPQVK, ECPLSQSMISSIVNSTYYANVSAAK, AGISQAVFAR, LEEELSVEGNTDINTDLK
TIMP1	6	SEEFLIAGK, GFQALGDAADIR, FVYTPAMESVCGYFHR, LQSGTHCLWTDQLLQGSEK, EPGLCTWQSLR, TYTVGCEECTVFPCLSIPCK
TIMP2	3	EVDSGNDIYGNPIK, SDGSCAWYR, EVDSGNDIYGNPIKR
TP53	15	ELNEALELK, QSQHMTEVVR, SVTCTYSPALNK, ALPNNTSSSPQPK, GEPHHELPPGSTK, VEYLDDRNTFR, RALPNNTSSSPQPK, VEGNLRVEYLDDR, KPLDGEYFTLQIR, ELNEALELKDAQAGK, CSDSDGLAPPQHLIR, TCPVQLWVDSTPPPGTR, MPEAAPPVAPAPAAPTPAAPAPAPSWPLSSSVPSQK, LLPENNVLSPLPSQAMDDLMLSPDDIEQWFTEDPGPDEAPR, TYQGSYGFR
TYMS	6	IIMCAWNPR, EEGDLGPVYGFQWR, AEDFQIEGYNPHPTIK, DEFPLLTTK, TGTGTLSVFGMQAR, DMESDYSGQGVDQLQR

## Sheet: Biological-Library
Gene	Number of unique peptides	List of Peptides
C1QC	4	FNAVLTNPQGDYDTSTGK, FQSVFTVTR, TNQVNSGGVLLR, QTHQPPAPNSLIR
CEACAM5	6	CETQNPVSAR, SDLVNEEATGQFR, QIIGYVIGTQQATPGPAYSGR, TLTLFNVTR, AYVCGIQNSVSANR, RSDSVILNVLYGPDAPTISPLNTSYR
CPQ	3	LALLVDTVGPR, TYPDTDSFNTVAEITGSK, VGALASLIR
ELF3	1	YDASAIDFSR
ITGAV	13	LEVSVDSDQKK, AGTQLLAGLR, QVVCDLGNPMK, TCSLPGTALK, LQEVGQVSVSLQR, TLGMVYIYDGK, ISSLQTTEK, CQPIEFDATGNR, EPVGTCFLQDGTK, FSVHQQSEMDTSVK, MFLLVGAPK, SSASFNVIEFPYK, YDPNVYSIK
ITGB1	15	CDDLEALKK, SLGTDLMNEMR, FCECDNFNCDR, LSEGVTISYK, SAVTTVVNPK, LPQPVQPDPVSHCK, GICECGVCK, TVMPYISTTPAK, WDTGENPIYK, SGEPQTFTLK, LKPEDITQIQPQQLVLR, IGFGSFVEK, GEVFNELVGK, GCPPDDIENPR, DNTNEIYSGK
KPNA2	6	EKQPPIDNIIR, QPPIDNIIR, LLGASELPIVTPALR, EATWTMSNITAGR, TGVVPQLVK, NVSSFPDDATSPLQENR
KRT17	2	GSSGLGGGSSR, LSGGLGAGSCR
KRT20	12	GTEVQLTELRR, LTVEADLQGLNK, SLSSSLQAPVVSTVGMQR, TVVQEVVDGK, VFDDLTLHK, TTEYQLSTLEER, LGTTPSVYGGAGGR, TDLEIQIEELNK, GTEVQLTELR, MAMQNLNDR, SQIKDAQLQNAR, CVLQIDNAK
MMP2	1	FQGTSYDSCTTEGR
MMP9	6	QLSLPETGELDSATLK, AVIDDAFAR, FQTFEGDLK, QLAEEYLYR, QSTLVLFPGDLR, SLGPALLLLQK
MUC1	6	EGTINVHDVETQFNQYK, QGGFLGLSNIK, YVPPSSTDR, NYGQLDIFPAR, YVPPSSTDRSPYEK, DISEMFLQIYK
PFN1	8	CYEMASHLR, TDKTLVLLMGK, TFVNITPAEVGVLVGKDR, TFVNITPAEVGVLVGK, DSPSVWAAVPGK, DSLLQDGEFSMDLR, EGVHGGLINK, STGGAPTFNVTVTK
PLAUR	1	VEECALGQDLCR
S100A8	3	LLETECPQYIR, KLLETECPQYIR, ALNSIIDVYHK
S100A9	4	TCKMSQLER, VIEHIMEDLDTNADK, NIETIINTFHQYSVK, LGHPDTLNQGEFK
SATB1	2	NTNTLFSVK, FLSLPQPER
TIMP1	4	GFQALGDAADIR, EPGLCTWQSLR, SEEFLIAGK, TYTVGCEECTVFPCLSIPCK
TIMP2	3	GAAPPKQEFLDIEDP, SDGSCAWYR, EVDSGNDIYGNPIKR
TP53	2	ELNEALELK, ALPNNTSSSPQPK
