# Supplementary material
Source: Research Square preprint supplement (doi:10.21203/rs.3.rs-9258373/v1)
Supplement: Supplementary file 7 [file 8c615f0917a3781326a18fad.xlsx]

## Sheet: B2_rPecomProtein_Summary
	Recombinant protein spectral library (rPSL)		Biological and recombinant protein spectral library (Biological-rPSL)		Biological protein spectral library (Biological-library)		Library-free
	DDA Spectral Library	DIA data	DDA Spectral Library	DIA data	DDA Spectral Library	DIA data	DIA data
Gene	No of unique peptides	No of unique peptides	No of unique peptides	No of unique peptides	No of unique peptides	No of unique peptides	No of unique peptides
BTC	2	ND	4	ND	-	-	ND
C1QC	8	4	10	5	4	3	2
CPQ	15	6	19	8	3	2	4
CDX2	5	1	5	1	-	-	ND
CEACAM5	9	8	11	9	6	6	7
CXCL10	3	1	3	2	-	-	1
CXCL12	2	1	2	ND	-	-	ND
CXCR3	1	ND	3	ND	-	-	ND
EGF	1	1	1	1	-	-	1
ELF3	8	2	8	3	1	ND	2
FOXP3	5	ND	8	ND	-		ND
IL1B	2	ND	3	ND	-		ND
KPNA2	2	ND	6	1	6	2	1
ITGAV	46	19	56	20	13	7	10
ITGB1	10	7	18	11	15	11	10
ITGB6	24	5	27	4	-	-	4
KRT17	3	2	5	1	2	ND	1
KRT20	15	12	20	15	12	11	11
MIA	3	3	4	4	-	-	3
MMP2	24	3	28	1	1	1	ND
MMP3	15	4	18	3	-	-	2
MMP9	24	13	27	12	6	6	11
MUC1	9	4	9	4	6	4	3
MUC16	2	ND	2	ND	-	-	ND
PFN1	10	8	11	7	8	7	6
PLAUR	10	3	11	4	1	ND	2
PTEN	13	4	18	5	-	-	2
S100A8	2	2	3	3	3	3	2
S100A9	1	1	4	4	4	4	4
SATB1	11	2	17	3	2	ND	ND
TIMP1	6	4	6	4	4	3	5
TIMP2	3	ND	5	ND	3	ND	ND
TP53	15	ND	17	3	2	1	ND
TYMS	6	1	8	2	-	-	1
