# Supplementary material
Source: Research Square preprint supplement (doi:10.21203/rs.3.rs-9258373/v1)
Supplement: Supplementary file 8 [file 9a8085dca9c7c08e778c6cc7.xlsx]

## Sheet: Biological-rPSL DIA-MS
Gene	20241001_CRC_FFPE_DIA_CRC1	20241001_CRC_FFPE_DIA_CRC10	20241001_CRC_FFPE_DIA_CRC11	20241001_CRC_FFPE_DIA_CRC12	20241001_CRC_FFPE_DIA_CRC13	20241001_CRC_FFPE_DIA_CRC14	20241001_CRC_FFPE_DIA_CRC15	20241001_CRC_FFPE_DIA_CRC2	20241001_CRC_FFPE_DIA_CRC21	20241001_CRC_FFPE_DIA_CRC22	20241001_CRC_FFPE_DIA_CRC23	20241001_CRC_FFPE_DIA_CRC24	20241001_CRC_FFPE_DIA_CRC25	20241001_CRC_FFPE_DIA_CRC26	20241001_CRC_FFPE_DIA_CRC27	20241001_CRC_FFPE_DIA_CRC4	20241001_CRC_FFPE_DIA_CRC5	20241001_CRC_FFPE_DIA_CRC7	20241001_CRC_FFPE_DIA_CRC8	20241001_CRC_FFPE_DIA_CRC9
BTC								3677829.999999896
C1QC	4873026.536208752	10005401.048394583	11118215.785629716	8144961.112664885	3172256.0835921257	2471046.153127335	3073134.0490471344	4706683.103163384	2577910.0583087094	2676298.010329395	6017808.309454872	4172155.6349582067	4313800.762734957	3216377.1227116156	3382956.3070176844	9481009.279933479	10314006.486601641	5652604.074885786	5.83157e+06	5775492.786786028
CDX2	4324210.000000142															1788900.0000000626
CEACAM5	246511146.12718722	55267727.62730355	6.30693e+07	7.33171e+07	53135232.07118022	26617404.336807266	63540964.15278868	228591128.5129039	8.1395e+07	70300260.10511622	63923193.600425646	34158622.328032725	74403100.84060225	58776140.70648829	52512069.30182665	13671377.567672558	6683477.628449069	194877645.89931938	271372348.76214135	213967618.27127883
CPQ	6969296.9409994995	3609491.7292199754	4027211.923214387	2763488.7819419354	3124179.1765709016	2077690.1741646228	3617527.7979502776	6122889.5928280195	5776350.921171251	3432706.7582606804	2332223.8665882037	1511370.9453340909	3934434.1768281604	4243422.0453917915	3634659.7111952845	6098391.263460734	5.88365e+06	6570501.122026138	7876891.1895306865	7315554.237963845
CXCL10	14228855.50380533	2894729.7657386423	2693949.4581945892	2336780.6299626427	1279115.4654495672	1027845.1818990388	1124404.3526025428											8677728.571532669	3801817.816083113	3367758.7768288204
CXCL12			4194410			2942699.999999996		6655140.000000168
CXCR3	1865369.9999999797
EGF	8217310.0000002915	12672700.000000399	10728900.000000121	11624199.999999905	8891330.000000274	4692090	6517309.999999887	22751600.00000038								26501199.999999702	22285799.999999564	16454099.999999726	16129499.99999966	16244299.999999726
ELF3	73882677.86883576	4112723.3275306583	3994696.8649537237	749000.6058280534	1220131.1422596592	2779599.6007627957	1497956.2663162583	22768949.630515505								18683058.67090504	16677687.495256018	36360060.85349338	14880952.587421931	12189266.071503205
IL1B		547682.0000000085	741599	1408690.0000000033																1565420.0000000133
ITGAV	3694258.690794977	2078665.1195437443	2554110.3603045233	1924158.6716435223	1822942.3121075267	1407044.3601379155	1703771.0617963294	3312347.7604975174	1223969.612985538	1433556.773141032	2493232.4842715156	1857406.2909208757	3405708.3631841107	2108610.5602655276	1878240.1268299893	1886853.1346708485	1730903.028812164	2169561.7989609456	2809527.313366213	3168021.393908237
ITGB1	10781110.920915958	6658867.811201285	7140079.043475945	9444041.634770166	6619940.031672571	3501166.804044984	6821490.044777594	13877419.084910607	3873142.2176896427	4514322.565511567	6.34172e+06	4674789.032003724	10891555.63902572	8278247.8037470225	8349958.472217622	15184774.85915423	14504585.221534085	10370545.142419053	13808148.606805762	12609620.191539813
ITGB6	6799049.626784667	3060081.9428457017	835886.9214765197	457889.1461905606	402204.5445368493	468499.10946002335	276506.70746322244	1680340.2310198054								1250358.0492612254	1347548.4741412054	1335775.592386285	983160.8481203153	897998.8801963665
KPNA2		3608086.8604302253	3422994.9804675607	2643378.343673863					2309145.165280612				3613924.545545318	1764906.0987319748	2029553.0198418838			5171791.552403751
KRT17	1336936.7841216575					372667.7940125957		1303628.2216306583							1057260.8865756246			1153600.7503662102
KRT20	15014581.299061332	10007563.170802483	14309447.473940998	12210751.044783251	8088015.223185092	4683997.633999738	8287233.024011489	18987265.380684037	5202113.017461535	6358792.943328723	9983167.680831902	6296978.089675934	9189022.309560115	7020052.290297155	6752613.810789302	7035558.035697986	6312864.407684624	9065405.463386053	15570435.74906605	16397410.06733171
MIA	11904877.700103324	8.41465e+06	7741035.121414544	7195302.194296923	5126543.217161019	4181607.6880605416	6322811.164152871	16184658.783164715								15583550.507597081	13550328.592236258	12805311.379416768	13755494.494956583	11608203.034730542
MMP2	542916.9999999976		782059.1684331548	513199.9999999974		699134.9721633133	196487.99999999304						1078636.0945161104		741710.6681869101	1234869.999999988
MMP3	247519.10681995365	406586.6615859107	997951.6347871135			3846443.4535824414	1774220.485983758											1312320.7046292352	477744.37492274476	57443899.99999972
MMP9	2754259.917641558	3503559.9719840507	3896056.7110666125	7771347.901496792	1673064.2412387887	710686	1207343.228629386	3227167.519082418	604473.7315220012	1115621.5534609943	2782497.654317637	2439949.7888497273	1858671.1233950257	1211367.872369585	1430311.462519771	3430928.681045984	3217902.9259514078	2478743.948650832	2794104.5928555643	2935567.7738808016
MUC1	1960523.0789371917	26513249.564665746	30916000.923926402	43778210.57168572	1879606.5353489064	1804375.476798531	1433575.1577975056	3.3531e+06	839818	4346129.674667108	16294298.662531806	15677232.818109768	7034994.1032586545	4426834.384753196	3737916.426574761	4190996.197720952	4100527.4196659965	4149682.1778352167	6728444.254745513	6.71695e+06
MUC16	2575487.0000000843
PFN1	37933112.977361515	32048579.897793315	34467558.32345361	35867228.13854034	48092286.237523094	29370684.504194435	43824132.388236605	50134147.130229175	2847730.9680784377	15722487.92876063	2168968.7873797137	2491858.2733767815	14304456.570882045	10081913.120738437	12065105.891914975	54094742.79769964	53925016.02499364	6.85108e+07	67348447.48397852	71091034.48154254
PLAUR		278769.00000000733	324955.0000000115
PTEN	2490954.792198934	2041663.0416930118	1776024.087665133	769372.1162745841		1483833.1699488335	1097799.0889488128	1398577.164846252								1676391.3664914838	1959947.859202257	4933113.111512541	3203139.0356376297	3622947.726362397
S100A8	15693356.930155996	92793036.01572357	139923111.93771568	126130296.05238065	47085431.60031165	21112779.369265225	35198696.33315128	17942750.019330762	13834084.252670944	14532722.698948722	33625889.70344894	42428566.91436918	51954340.10361262	9655225.505591944	27721370.81519626	15039390.47572904	17861094.10480681	9.20333e+07	1.00669e+08	102804535.67191307
S100A9	13267764.012441143	19156968.433655214	24466026.462713417	31580527.248568434	21085222.99425039	15992681.940254012	26057708.01448132	2460435.8837977285		1035324.8606434172	3009251.1523806294	3509118.1981846853	8154053.231998246	5703085.136315002	9478203.783937512	2659496.2524627578	2402062.8164305314	70383957.12246606	21827824.10010446	40197912.98883679
SATB1	23048500.000000313							599575.0000000119		1524960	1149079.9999999749	1773530.0000000042	4904140.000000075	2174409.999999958	2814689.9999998943			838306.9999999828	11553699.999999588	1269159.9999999881
TIMP1	2774907.635761848	3689353.266782834	5819305.276976273	8851225.987821745	5262932.267019463	2892413.308620066	4948105.359108768	6495794.5189744495	1015686.6429002255	1984420.5600090052	3342771.866801075	3872481.818540836	3492328.230736934	2830325.066149244	3708210.027387063	5.38552e+06	3483157.850508519	4560308.658118624	6.69343e+06	5509435.509972718
TIMP2																		1532120.0000000114
TP53			47331604.06412956					61969614.42455038		152992.00000000047			651880.0000000217	626700.0000000047				6.88427e+06	69184933.11739784	84955830.33367625
TYMS								5246349.999999815										2557440.000000032

## Sheet: rPSL DIA-MS
Gene	20241001_CRC_FFPE_DIA_CRC1	20241001_CRC_FFPE_DIA_CRC10	20241001_CRC_FFPE_DIA_CRC11	20241001_CRC_FFPE_DIA_CRC12	20241001_CRC_FFPE_DIA_CRC13	20241001_CRC_FFPE_DIA_CRC14	20241001_CRC_FFPE_DIA_CRC15	20241001_CRC_FFPE_DIA_CRC2	20241001_CRC_FFPE_DIA_CRC21	20241001_CRC_FFPE_DIA_CRC22	20241001_CRC_FFPE_DIA_CRC23	20241001_CRC_FFPE_DIA_CRC24	20241001_CRC_FFPE_DIA_CRC25	20241001_CRC_FFPE_DIA_CRC26	20241001_CRC_FFPE_DIA_CRC27	20241001_CRC_FFPE_DIA_CRC4	20241001_CRC_FFPE_DIA_CRC5	20241001_CRC_FFPE_DIA_CRC7	20241001_CRC_FFPE_DIA_CRC8	20241001_CRC_FFPE_DIA_CRC9
C1QC	5718026.695056266	4.23935e+07	14750573.758789523	11228939.302576166	4.55656e+06	4154793.250749452	5610044.744105542	6240333.730572179	3045153.137730772	3902465.2098586187	8696559.373603364	5668543.908505859	7077904.656296133	5659959.207982165	5269687.599293335	14463566.181903759	13676666.23311258	8.60095e+06	9097682.399826348	9138893.497895803
CDX2	13927280	3517860.0000000414	2458400.000000024	1815519.999999991				13050680.000000058								8490969.999999734	7344190.000000071	5710759.999999879	5347720.000000102	4617089.999999986
CEACAM5	341665467.0606616	76472105.82041642	80833458.18811066	93226430.81707905	71557985.35029806	3.51465e+07	102797694.01906912	324073549.2536438	110742243.04607214	116512205.82341135	81931233.85231203	47258662.593261525	90760536.05140054	81711402.77588904	79701109.637692675	20068207.49352493	9.16251e+06	255643978.81396255	370727265.6769363	263283875.7867488
CPQ	6072131.464466075	3900443.9100023615	3520894.135667619	4899172.681021203	2834388.4596621674	1856530.981178079	3377044.3765286617	6091631.470348139	4345354.929360394	3344079.563796579	3063590.120425782	1921268.3796820547	3441553.064048541	3755844.315169537	3348988.6488238527	5505459.493695644	4760566.419597944	5997305.922232443	7114740.694131641	6632732.2841674825
CXCL10	4478490.000000131	3148630.000000018	2249110.000000069	1954510.0000000058				13613299.999999994								11680000.000000257	8814100	7222829.999999837
EGF	9668210.000000289	8929669.999999896	7096300.000000062	7121269.999999852	7572029.9999998845	3737639.999999996	6233850.0000001965	17559400.000000514								23017500.000000164	21291000.000000574	12920799.999999933	16343200.00000056	14749399.999999965
ELF3	8252002.298351388							10914200.064136554
FOXP3									2011100.0000000654
ITGAV	7.19111e+06	4.51775e+06	4488935.9055888485	2168567.7946483265	2601698.1209151107	2716959.9457166963	3733946.6816455787	3248118.447744054	1495700.1495814198	1406159.107760219	2240028.4993681638	1475621.2765209666	2818554.906594356	1595018.095110696	2465008.5418511783	3036024.7326539825	2996031.6401848863	5036104.302604657	4391190.407431443	5105993.128761358
ITGB1	12205005.599543728	7414078.023716199	8.42629e+06	9420173.179658258	6287800.790766847	3128795.2127955356	7.31098e+06	13862728.934952086	3886825.401258122	5098374.513174621	6674592.889645145	5.15873e+06	10709310.716737453	9352752.420926988	8827663.999579452	17045394.055117596	16876613.677715734	11370922.384543704	15365856.449278463	14192163.058402635
ITGB6	11009534.631421285	7.94702e+06	2.32153e+06	1487575.476168888	1510128.2266497568	1459482.3137604666	1370926.0681142607	4590560.622064682								4173275.3868768397	4634843.511622484	5220417.479228254	3910723.2672969014	3878699.745383262
KRT17	1694244.6337449143														441544.4737739394
KRT20	11828601.627681939	11074139.194460059	12050061.230052043	13091946.870431682	7518203.739291161	3575765.7633783515	8339213.983594985	17096501.04794258	5394448.122060574	6020188.3517601425	11800351.857004693	6645204.216472751	9.01367e+06	8.33709e+06	8188420.673775393	7071585.226400216	6681201.274859852	7146849.413774387	14732524.524028698	15097803.472173644
MIA	9914218.078809856	7065576.468583601	6647868.1408754885	6345697.137417204		3715436.3954170523	6181417.124677202	12198480.325559843				4696515.331106749				14468347.128282722	11729098.762303144	9165149.410229497	12264271.375674179	9.89395e+06
MMP2		5468609.999999975						4958070.000000159		3595929.9999999735		13303400.000000235		21388300		1319150.000000013	1190249.9999999795			17825399.99999965
MMP3		696778.3919754007	1032995.1261705396	21826875.924610022	5651842.443218618	4012757.5912818387	1.92568e+06	42368937.192648344					18570575.914669324	12016049.317891272			28181517.752441324	1.48905e+06	37465922.974036425	37399818.905032784
MMP9	3998776.360168317	4898616.613280647	5.27192e+06	8675909.913382249	1324538.2323988338	1033696.8763015849	1422788.278162871	3600400.413245742	839019.2376969671	1204850.672759883	3243200.4140380137	2699812.4872182207	2053817.1192010385	1550367.8036444525	1469882.872380178	4.45997e+06	4190907.9233225207	3102019.5930256653	2800610.439623343	3130894.0503526125
MUC1	7398947.728394367	50455155.23617067	50428182.412019424	78946111.51884386	1297970.0683656218	1147428.3200320313	1602750.6762733662	3033479.8285404523	927869	5355869.808836679	24051868.237606157	23086706.282725938	9.35788e+06	5.1463e+06	4385077.210164146	4233683.393224399	4058465.3529377123	3973995.026191699	8219462.201468318	7517048.361969875
MUC16	2070280.0000000075
PFN1	55290488.26458461	42222879.41445445	39038381.91635375	45703773.60619429	68944713.57118039	36179142.847547576	65284898.65185418	65191635.78637758	13849273.794497492	30589924.572322268	16284076.363301858	14612566.834439237	5.23151e+07	39443280.12591809	43715677.47483783	72460076.35478847	72056555.09956582	86439827.54032002	100700877.2726615	98502874.43196005
PLAUR	2024129.9999999886		324955.0000000115		2296389.999999955
PTEN	2073898.349701512	1252233.674775194	1060645.7411472236			1853427.283069049	840174.0719937105	1032644.6685408591	1068350.0000000068							1526615.5988897763	1817022.1326683508	2497658.608277951	1614104.6049038777	4048365.8222656636
S100A8	29884244.158285856	166473632.05857265	244263304.91792277	363206150.1195189	64466057.33010506	24447171.425880186	41957636.39973802	21961558.814265866	25313679.130076833	26836755.604157742	79744660.47879113	89350321.14089681	97921772.54601686	50895754.34959586	52920047.316425435	3.84892e+07	3.68097e+07	141183311.8469693	178771445.76750496	172838503.77782097
SATB1	23100200.000000786							57002199.99999802						3752253.6185870054		53532399.99999868		65211199.99999769
TIMP1	7135203.740513351	6109180.113017279	6392029.925481661	8094404.286822361	5264443.360163533	2444081.568179607	5289823.293262351	5604513.830253558	1924348.186848361	2569892.4979255847	4222494.527474785	4295196.666091251	5589649.362681277	4287975.399804436	4.72026e+06	6153968.4371671695	6.57898e+06	6613098.782184205	8205772.035932799	6662709.471658925
TP53	7015320.271377524												80309199.99999806	56662800.00000015
TYMS	8022710.000000154							5181680.000000025

## Sheet: Biological-Library DIA-MS
Gene	20241001_CRC_FFPE_DIA_CRC1	20241001_CRC_FFPE_DIA_CRC10	20241001_CRC_FFPE_DIA_CRC11	20241001_CRC_FFPE_DIA_CRC12	20241001_CRC_FFPE_DIA_CRC13	20241001_CRC_FFPE_DIA_CRC14	20241001_CRC_FFPE_DIA_CRC15	20241001_CRC_FFPE_DIA_CRC2	20241001_CRC_FFPE_DIA_CRC21	20241001_CRC_FFPE_DIA_CRC22	20241001_CRC_FFPE_DIA_CRC23	20241001_CRC_FFPE_DIA_CRC24	20241001_CRC_FFPE_DIA_CRC25	20241001_CRC_FFPE_DIA_CRC26	20241001_CRC_FFPE_DIA_CRC27	20241001_CRC_FFPE_DIA_CRC4	20241001_CRC_FFPE_DIA_CRC5	20241001_CRC_FFPE_DIA_CRC7	20241001_CRC_FFPE_DIA_CRC8	20241001_CRC_FFPE_DIA_CRC9
C1QC	4191022.884619774	9147152.731539074	9.42052e+06	7064701.582035786	2723110.154733127	1935824.2107509521	2802553.5655431175	4835929.144013345	2221673.7799601117	2402268.1993781393	3862985.482723986	3157169.6851525647	3362982.1949963807	2285539.143449745	2.50406e+06	9.0208e+06	9976342.979383377	7063602.462281297	5568083.401882938	5308022.778539294
CEACAM5	197510893.9619478	46346393.67993704	50595022.60452979	56523842.15329543	44259666.36740965	23231316.731243517	68387748.61345212	197310852.84931123	79295692.65956074	40216747.99911923	48009371.94819929	26636204.890160043	5.33357e+07	40430536.73839876	46001080.349283785	11308622.081149248	5543446.153347256	196418896.16597983	235648020.43116382	190641015.88675678
CPQ	7073691.295645526	3.92897e+06	3229116.1543338145	2539717.122233127	3127404.037759477	1769553.2262930034	3857966.094909609	6353722.367147448	5801001.414720875	3922691.4792611552	1137133.1890239054	1029880.7280369434	3747944.9715138394	4.46951e+06	2474427.196633716	6553257.301653075	6163665.280157066	7060446.672150181	8527276.553862454	7808133.579840357
ELF3	82014599.99999912	7296570.000000145	4315540.0000001015	749507.0000000014	1357350.0000000037	3242110.000000107	2486039.9999999735	25451199.999999214								17237600.000000067	20517499.999999948	40591100.00000116	16434500.000000287	12699500.000000013
ITGAV	2039763.4387096611	2153350.805101198	1581473.731766958	1576555.9861311933	1123672.8496807716	1187348.2204769403	1549538.1422008886	1387037.914267858	1696320.259477865	1528784.7889223539	2472596.037942958	1680200.6964059307	2717862.453109347	2065234.954832834	2000706.7941724185	1260631.5739471023	1441924.7165037761	1395823.108852607	2023177.379812253	1854891.4085694184
ITGB1	11008425.036170576	7000911.144302311	7.38259e+06	8852666.627685772	6730180.174579915	3179324.4019477353	7033816.813506851	14879362.540105632	3976303.4157461645	4.66848e+06	5917653.863910332	4.68728e+06	10944975.81435523	8.39264e+06	8.48722e+06	15767992.954110198	15524801.529932354	10757866.171788841	14294338.794455774	12825190.56786611
KPNA2		6825479.973065735		4981113.6903265575		2982147.561847448			4297652.895311633		3830955.810493659		5055822.672008684	3325743.3433900154	3618751.407825157			10196324.885284675
KRT20	13686911.898293525	13223867.497070298	13924270.983440323	12893346.54931196	7.19226e+06	4345406.381171271	9044854.130546112	17852835.10311085	5552248.567687719	6.39996e+06	9865234.853736138	6798409.368654616	8.52615e+06	6959043.420338704	7036326.962487267	6595349.655048544	6.77791e+06	9184312.388982289	16076971.610837966	16881801.70484668
MMP9	3078838.959824462	4.84825e+06	5891697.503080972	8.86003e+06	2148401.279487311	647553.3591580635	1498299.007716977	3554701.157044004	1073615.6247524987	1362286.6749279306	3144657.027352107	3879146.0299734566	2862242.5996426474	1571814.4435011847	1879038.4845153529	3703568.342985411	3946468.2924681795	2285035.8804183393	3162574.6698705787	2923588.8068318777
MUC1	1349250.848452373	50770482.62263074	57312326.20519947	65317305.32519595	1301552.9377178873	1687944.4833880274	1607174.8509268828	2527183.1206508786	949488	5111470.037657255	26322729.542232107	22778666.288925495	7635495.382817284	5.00493e+06	4289601.8547089035	4102517.5283832285	4063735.5210113707	4449097.123756043	7863408.489829206	6999138.101780988
PFN1	34858213.49574931	26697726.43599366	24209192.494612705	26489209.81593391	38427015.54970192	20416799.418384213	32103382.942877065	3.64538e+07	3.35367e+06	9204536.139242753	3735002.7244978165	1.61661e+06	2.54903e+07	11614908.706529351	17473966.60385028	33476412.91240898	36682831.63567882	56106514.350073814	54764432.631629884	59806883.931448184
S100A8	15197566.508841569	94030727.95046607	140468144.5307366	124302583.83411834	45839925.73446904	2.01114e+07	35688518.775435805	10813828.764525237	13629148.830004346	14317437.782764649	31346983.118192695	39511181.149697155	5.08699e+07	15232238.223932326	27683496.490277644	13578207.330872152	19303165.927205417	94650823.24550547	103367374.92277667	105116610.71642207
S100A9	14856106.132262168	24802013.62578292	29327532.672598045	31797865.616617016	21622047.24522587	17996955.623262722	31704497.907521017	2413357.6270624483		1179079.0953406815	12978738.750812506	3634184.9525822382	9260569.266677484	6.49496e+06	15346233.217058448	2021292.9243562806	2808891.820484037	8.27244e+07	25617158.775957666	69696152.39001642
SATB1	683624									269682.9999999999										1226749.9999999893
TIMP1	2.63038e+06	4977181.898900109	5635627.830106715	8408689.288770763	5549838.719903028	3131282.0273942356	6267902.508139776	7018044.324947831	1142163.0433130867	1906603.0423969487	3085095.171535403	3829700.9635232287	3575208.146359999	2623179.8190452037	2749284.874731893	4711121.934487733	4510660.153596423	4624511.681678717	6860115.998841882	5518593.957190031
TP53										152992.00000000047			651880.0000000217

## Sheet: Library-free DIA-MS
Gene	20241001_CRC_FFPE_DIA_CRC1	20241001_CRC_FFPE_DIA_CRC10	20241001_CRC_FFPE_DIA_CRC11	20241001_CRC_FFPE_DIA_CRC12	20241001_CRC_FFPE_DIA_CRC13	20241001_CRC_FFPE_DIA_CRC15	20241001_CRC_FFPE_DIA_CRC22	20241001_CRC_FFPE_DIA_CRC23	20241001_CRC_FFPE_DIA_CRC24	20241001_CRC_FFPE_DIA_CRC4	20241001_CRC_FFPE_DIA_CRC5	20241001_CRC_FFPE_DIA_CRC8	20241001_CRC_FFPE_DIA_CRC9	20241001_CRC_FFPE_DIA_CRC21	20241001_CRC_FFPE_DIA_CRC25	20241001_CRC_FFPE_DIA_CRC27	20241001_CRC_FFPE_DIA_CRC14	20241001_CRC_FFPE_DIA_CRC2	20241001_CRC_FFPE_DIA_CRC26	20241001_CRC_FFPE_DIA_CRC7
C1QC	5306885.309845218	11564045.650157498	11834820.127301624	8.13602e+06	3237313.563442216	3814875.158146031	2878464.720528687	6633725.459904141	4713882.613824221	10495404.26955643	10381819.038692435	6515707.745384395	6.2212e+06	2424948.5104829175	4.81223e+06	3308309.3074014843	3127437.9946774216	5020410.360730024	2817396.8451043544	5839045.2864157995
CEACAM5	311591068.0394968	69490415.78990027	75597299.87709634	82632396.96703252	64666614.387972675	87062679.04574943	97953752.63867792	72930437.89408119	45180062.591177024	17407118.415579066	8206746.505441287	324798731.8388641	262840546.4845948	114121836.65144722	81071571.80121912	68966883.08590706	35241889.32921001	283704087.3031253	70379967.43265846	248590279.95806378
CPQ	4418450.459738399	3662744.191401368	3.53244e+06	2944873.511202251	2848592.7556330473	3015485.5669394895	2369232.884543753	1940058.0076731064	1415080.3756244672	5.755e+06	6039494.774908788	6523535.855962811	5776589.931000459	4.4616e+06	2583270.1443088166	2221214.6424516765	1609398.1864022538	5620607.857219086	1937518.6633882967	5328784.0867370665
CXCL10		2702510.0000000875	1567959.9999999602														961128.9999999994			6627069.999999846
EGF	8759859.999999903	7268289.999999923	6361360.000000018	6195520.000000165	7296359.999999827	5813260				19829799.999999322	18872200.00000018	12830100.00000044	11508999.999999825				3860350.0000000927	16140899.999999924		10647299.99999976
ELF3	8723489.999999927	871537.9999999794	830782.0000000092							2435050.0000000084								4811600.000000073		3028929.999999993
ITGAV	2578311.3219063445	1844692.6905751522	1796375.716799572	1252610.4897344937	1753010.6626539405	1753574.2010110582	1538236.9561829483	1278397.6267012001	1716824.3461618342	1412188.7240984424	1690599.571014512	1808583.054657765	2339430.5463823867	620336.0830680375	3861678.4476433136	2805854.310997097	1287110.5948200799	1748531.3907999254	1518125.9327799052	1936718.6555627473
ITGB1	11031107.19510366	5620220.030627157	6710211.264991703	8530853.657952767	5822554.911647233	6214963.225676038	4326649.878801692	5993721.887216394	4451949.7592218295	14055013.638344772	14342539.725232081	12771529.755640341	10854054.338804606	3558756.879398649	10409564.336642712	8044612.133790122	3.07209e+06	1.30454e+07	7586122.938722263	9330966.697620418
ITGB6	3859055.402822927	1516413.8312554895	1180876.7754847573	529278.8704402688	496901.36466595763	438080.13112280227				1611630.3311366418	1818144.4392129532	1416361.0936966795	1210506.9591405257				644998.7211320277	2244213.5419309065		1839007.8687697214
KRT20	13271325.342797458	10216983.347203001	12212376.801871832	11069191.768419027	4897964.202477681	7332596.874881901	4704835.614688074	6279897.473046601	4545449.352056355	6549200.355241626	5.41979e+06	12639805.517899793	12591628.288542703	4193363.1518416996	6713542.275163736	5553029.963441993	3557284.2800458316	16151393.540873948	5901938.122606045	7009719.6118036425
MIA	10836564.430091856	8.55389e+06	7408029.1445439095	7036830.984791816	5079022.660933495	6229209.052611428				15792159.891250009	13341858.973473469	13294356.466740897	11524866.058255782				3627226.197288535	15990366.083534913		12431908.357494703
MMP3	197773.00000000102	441056.00000001263	727419.0000000172
MMP9	2677527.6508020284	2863968.440379805	3498603.552589909	4724831.670789532	1599265.5422552994	1280298.319620748	1057554.4808370166	2007035.3723154503	2016640.0100431163	2921343.028878339	2660367.1861058054	2365691.945964573	2116123.720871263	655789.0569297383	1420041.187736604	1190993.8394393162	1022532.5135129334	2710453.7912369934	1122034.1166998441	2531448.9848975865
MUC1	7480960.521153133	8082861.889393911	30999100.101364672	7.82942e+06	1236949.6823405188	1527401.8933146466	4363197.477090479	14217672.13542529	15476821.576900944	3879607.8634580267	3565543.709091861	9542806.181392716	6610741.984080931	959223.5648910883	4806257.724153445	4055095.8407902485	1673907.5355620447	3909745.5797623424	4708195.840892787	4529759.072951824
PFN1	35497097.86304724	25739268.315282177	26520491.08163103	24605530.524352826	40541757.34069281	33990694.55684586	1.64654e+07	6661220.860110132	3843069.227077767	39775418.585638195	40822775.568183236	55104095.16773559	55535975.21553075	3848697.2332086214	28528393.664312568	18546313.731577087	20323611.52173556	37148691.604063995	13903107.513359267	49399563.581382304
PTEN	5786179.999999935	2346929.9999999693	1822980.000000053	906410.0000000024							3430349.9999998854	4143849.999999949	3226559.9999999553					2859760.000000051		7018259.999999847
S100A8	20514344.10357797	132851274.58825637	195023117.01026016	183965969.40999794	57273033.91649358	4.42569e+07	19587229.29581272	78375486.30863008	8.90779e+07	17464772.275927406	22618615.785499074	1.30821e+08	132762741.97981857	17996491.611688677	50452145.73514095	37188441.45489075	24861598.82409032	9070583.202859614	38808287.63563928	119902459.32131323
S100A9	8097420.8365361225	6564517.703648352	22862137.340539515	7.71655e+06	12899364.098779269	13298471.52196942	1376292.9286197927	4673262.398409816	6716877.211707108	1972209.9586542384	2657495.7997062304	21284912.608787656	49128804.05282218	1587287.419461222	7063531.585819355	6227164.063058301	11510918.914416963	1739715.9575872768	5152609.458784949	75266297.96302995
TIMP1	3479227.061693213	5499461.830426522	7057139.447701435	7685892.160485311	3971346.8941094438	5998042.244668935	1805976.9943990454	2581988.572924555	3967336.474872116	5280455.139346065	4907378.064077498	7737827.783110274	6446574.243018713	1707129.3654519327	2880931.8539815056	2822164.593204732	2495824.2388202166	6119806.949145574	1930793.9144429546	5784263.274691616
TP53	1005209.9999999683		302447.00000001007
TYMS	7291735.735025206	609915.9842623756	518341.81545321754							1497042.2605889754	987682.0887690096	515917.1056346314					218791.59076063777	2548311.830861271		1489453.847920842
